# Supplementary material for: The First Myriapod Genome Sequence Reveals Conservative Arthropod Gene Content and Genome Organisation in the Centipede Strigamia maritima
Source: PLoS Biol. 2014 Nov 25;12(11):e1002005. doi: 10.1371/journal.pbio.1002005 (PMC4244043; doi:10.1371/journal.pbio.1002005)
Supplement: File S5 — Raw data for Figure S28. (XLSX) [file pbio.1002005.s069.xlsx]

## Sheet: FigS28_raw_data
	ID	N	n	c	a	g	t	gg	cg	cn	nt	tt	ct	ag	ga	nn	cc	tn	at	tg	ta	gc	nc	aa	ca	ac	tc	ng	gn	gt	na	an	CpGoe	ApAoe	ApGoe	ApCoe	ApToe	GpAoe	GpGoe	GpCoe	GpToe	CpAoe	CpCoe	CpToe	TpAoe	TpGoe	TpCoe	TpToe
1	Smar_temp_006128:	9212	0	1591	3050	1582	2989	260	359	0	0	1126	419	430	517	0	267	0	964	533	828	325	0	1159	497	545	502	0	0	480	0	0	1.31393	1.14772	0.820949	1.03462	0.974104	0.987048	0.957005	1.18949	0.93511	0.943497	0.971684	0.811656	0.836678	1.03836	0.972437	1.16102
2	Smar_temp_000465:	3006	0	623	1020	619	744	138	159	0	0	285	89	142	229	0	170	0	238	180	148	120	0	437	205	202	131	0	0	132	0	0	1.23939	1.26261	0.676062	0.955547	0.942742	1.09027	1.08265	0.935387	0.861587	0.969738	1.31662	0.577189	0.586243	1.17489	0.84957	1.5477
3	Smar_temp_003434:	2347	0	395	800	446	706	109	42	0	0	252	115	129	168	0	77	0	242	165	176	72	0	295	161	133	113	0	0	97	0	0	0.559539	1.08182	0.848551	0.98782	1.00562	1.10509	1.28609	0.95921	0.723012	1.19578	1.15827	0.967852	0.73136	1.22987	0.95102	1.1866
4	Smar_temp_011006:	4808	120	768	1548	809	1563	135	171	2	1	648	185	213	270	116	138	0	463	290	374	138	0	628	272	241	251	0	0	266	3	2	1.32328	1.26003	0.817758	0.974651	0.920059	1.03659	0.991748	1.06791	1.01144	1.10002	1.12492	0.740996	0.743201	1.10269	1.00535	1.27533
5	Smar_temp_013117:	17272	0	3088	5101	3602	5481	632	1026	0	0	2404	649	804	1145	0	483	0	1411	1139	1030	807	0	1996	930	890	908	0	0	1017	0	0	1.5932	1.32493	0.755787	0.975888	0.871675	1.07634	0.841341	1.25313	0.889734	1.01975	0.874853	0.662293	0.636304	0.996467	0.926598	1.38216
6	Smar_temp_001944:	5722	0	867	1907	981	1967	180	93	0	0	782	254	288	297	0	131	0	600	420	482	173	0	739	389	279	283	0	0	331	0	0	0.625666	1.16276	0.880888	0.965567	0.915259	0.908416	1.07024	1.16387	0.981528	1.34626	0.997197	0.852233	0.735258	1.24544	0.949535	1.1565
7	Smar_temp_007430:	2137	20	372	676	427	642	102	123	1	0	280	75	92	152	19	79	0	191	109	144	76	0	285	94	108	109	1	0	96	0	0	1.65477	1.33277	0.681111	0.91778	0.940494	1.12531	1.1955	1.02246	0.748364	0.798809	1.21996	0.671101	0.709064	0.849705	0.975333	1.45175
8	Smar_temp_004555:	2720	42	442	871	465	900	103	65	1	4	361	109	114	112	38	98	3	251	183	250	75	0	339	169	166	103	0	0	175	0	0	0.860215	1.21544	0.765601	1.17283	0.870927	0.75217	1.29569	0.992556	1.1374	1.19403	1.36443	0.745299	0.867458	1.18939	0.704274	1.21225
9	Smar_temp_012705:	10602	0	2276	2961	2376	2989	433	851	0	0	1186	390	511	761	0	385	0	848	581	562	617	0	988	650	613	660	0	0	565	0	0	1.66839	1.19472	0.770059	0.964356	1.01583	1.1468	0.813173	1.20963	0.843459	1.02256	0.78796	0.607791	0.673224	0.867344	1.02857	1.40741
10	Smar_temp_005395:	784	0	114	266	143	261	28	17	0	0	94	34	34	50	0	13	0	86	64	72	18	0	94	50	51	31	0	0	47	0	0	0.817568	1.04155	0.700773	1.31856	0.971164	1.03055	1.0735	0.865661	0.987273	1.29271	0.784241	0.89588	0.813067	1.34437	0.816831	1.08184
11	Smar_temp_012440:	23747	61	4693	6607	4635	7751	954	1127	1	3	3244	1322	1090	1361	57	900	2	1945	1463	1468	1081	0	2435	1343	1137	1574	1	1	1237	0	0	1.23036	1.32464	0.845242	0.870792	0.901916	1.05539	1.05453	1.18014	0.817657	1.02856	0.970399	0.863042	0.680727	0.967043	1.02756	1.28225
12	Smar_temp_010220:	5122	0	999	1627	859	1637	128	220	0	0	624	230	187	286	0	178	0	521	324	350	183	0	620	371	298	339	0	0	262	0	0	1.31312	1.19965	0.685331	0.93908	1.00194	1.04815	0.888512	1.09228	0.954331	1.16912	0.913542	0.720366	0.673087	1.18017	1.06176	1.19269
13	Smar_temp_011032:	3784	0	624	1306	605	1249	106	66	0	0	513	187	197	176	0	103	0	337	236	302	111	0	560	268	212	197	0	0	212	0	0	0.661538	1.24238	0.94345	0.984372	0.781764	0.842879	1.09584	1.11259	1.06162	1.24439	1.00097	0.907916	0.700571	1.1818	0.956468	1.24435
14	Smar_temp_003777:	31269	20	5021	10031	5264	10933	982	835	0	0	4838	1414	1423	1570	19	859	0	3011	2024	2510	1041	0	4036	1913	1560	1561	0	0	1670	1	1	0.987858	1.25423	0.842672	0.96851	0.858502	0.929723	1.10814	1.23157	0.907351	1.18767	1.06543	0.805441	0.715656	1.09969	0.889175	1.26561
15	Smar_temp_000237:	1587	0	242	601	309	435	56	55	0	0	148	49	106	139	0	45	0	165	91	119	40	0	250	93	80	77	0	0	73	0	0	1.16726	1.09842	0.905837	0.872925	1.00161	1.18784	0.930782	0.848913	0.86189	1.01478	1.21944	0.7387	0.722371	1.07441	1.16082	1.24125
16	Smar_temp_007421:	704	0	117	193	168	226	45	37	0	0	101	24	38	49	0	17	0	54	48	40	26	0	64	39	37	37	0	0	47	0	0	1.32519	1.20959	0.825068	1.15354	0.871567	1.0639	1.12245	0.931217	0.871471	1.21589	0.874279	0.638983	0.645605	0.890013	0.985099	1.39212
17	Smar_temp_004680:	5530	0	719	1934	1155	1722	255	234	0	0	837	148	359	480	0	121	0	498	307	391	181	0	847	216	229	187	0	0	239	0	0	1.55822	1.25226	0.888753	0.9107	0.826923	1.1883	1.05706	1.20529	0.66452	0.859001	1.29435	0.661036	0.64925	0.853588	0.835227	1.56093
18	Smar_temp_006163:	3594	0	549	1044	702	1299	180	110	0	0	611	155	154	198	0	120	0	317	258	260	108	0	421	164	151	170	0	0	216	0	0	1.0258	1.38822	0.755199	0.946852	0.840094	0.97097	1.31273	1.00715	0.851306	1.02837	1.43092	0.781139	0.689036	1.01684	0.856733	1.30137
19	Smar_temp_000969:	252	0	54	71	62	65	12	14	0	0	18	11	12	22	0	14	0	23	24	12	15	0	21	15	14	11	0	0	13	0	0	1.05376	1.04979	0.68696	0.920188	1.2559	1.25943	0.786681	1.12903	0.812903	0.985915	1.20988	0.789744	0.655255	1.50074	0.789744	1.07361
20	Smar_temp_012599:	4879	304	899	1325	1083	1268	256	294	0	1	434	186	232	340	303	178	1	400	301	309	240	0	435	241	257	223	0	0	247	0	0	1.4733	1.20889	0.788814	1.05266	1.1616	1.15602	1.06491	1.20269	0.877567	0.987125	1.07456	0.796095	0.897334	1.06942	0.954458	1.31699
21	Smar_temp_008906:	839	0	149	266	174	250	36	35	0	0	100	31	47	58	0	27	0	77	56	52	39	0	100	56	41	42	0	0	41	0	0	1.13265	1.18577	0.851979	0.867916	0.971474	1.05138	0.997622	1.26209	0.790782	1.18545	1.02036	0.698228	0.65606	1.08009	0.945987	1.3424
22	Smar_temp_009015:	5116	0	714	1665	915	1822	174	147	0	0	790	207	259	311	0	101	0	537	335	455	142	0	639	259	229	242	0	0	288	0	0	1.15114	1.17924	0.869751	0.985493	0.905612	1.04437	1.06326	1.11199	0.883799	1.1146	1.01357	0.814056	0.767325	1.02803	0.951698	1.21748
23	Smar_temp_012603:	2036	0	364	650	372	650	77	85	0	0	251	87	85	117	0	67	0	205	125	167	71	0	241	124	119	107	0	0	107	0	0	1.27806	1.16136	0.715715	1.02402	0.987882	0.985161	1.13288	1.06756	0.900959	1.06705	1.02956	0.748656	0.804762	1.05252	0.920761	1.20955
24	Smar_temp_005042:	1205	0	168	447	185	405	28	21	0	0	171	42	64	75	0	28	0	137	72	104	27	0	190	77	55	58	0	0	55	0	0	0.814189	1.14584	0.932584	0.882537	0.911895	1.09287	0.985829	1.04681	0.884551	1.23555	1.19544	0.743827	0.692242	1.15796	1.02719	1.25624
25	Smar_temp_001511:	5098	0	835	1668	915	1680	165	129	0	0	648	226	261	302	0	138	0	535	360	418	178	0	606	342	265	254	0	0	270	0	0	0.86076	1.1104	0.871813	0.969981	0.973304	1.00876	1.00471	1.18772	0.895433	1.25182	1.00903	0.82132	0.76045	1.19391	0.923077	1.17046
26	Smar_temp_008444:	2793	0	497	911	576	809	119	116	0	0	296	112	175	191	0	95	0	243	166	205	108	0	341	174	151	142	0	0	158	0	0	1.13175	1.14759	0.931468	0.931479	0.920895	1.01663	1.00178	1.0537	0.947015	1.07336	1.07419	0.778008	0.776887	0.994965	0.986403	1.26318
27	Smar_temp_013119:	9337	37	1478	2640	1863	3319	397	520	0	10	1541	314	377	563	19	229	10	884	569	658	334	0	996	415	374	541	0	0	569	8	8	1.76329	1.33432	0.715701	0.894954	0.941995	1.06881	1.068	1.13257	0.85921	0.993064	0.9788	0.597662	0.701168	0.85921	1.02973	1.30616
28	Smar_temp_000219:	11575	0	1840	3943	1969	3823	341	265	0	0	1519	532	605	703	0	301	0	1159	758	968	311	0	1529	742	650	578	0	0	613	0	0	0.846649	1.13835	0.901994	1.03703	0.889966	1.0481	1.01808	0.993614	0.942609	1.18381	1.02909	0.875408	0.743302	1.16557	0.951101	1.20301
29	Smar_temp_003615:	395	0	52	133	65	145	15	13	0	0	59	14	16	19	0	4	0	52	21	41	11	0	51	21	13	24	0	0	20	0	0	1.51923	1.13884	0.731058	0.742481	1.06508	0.868132	1.40237	1.2855	0.838196	1.19939	0.58432	0.733422	0.839772	0.880106	1.25729	1.10844
30	Smar_temp_009267:	1758	0	271	691	260	536	44	48	0	0	212	53	93	104	0	50	0	203	75	167	44	0	299	120	95	82	0	0	68	0	0	1.19762	1.10086	0.910019	0.891857	0.963545	1.01766	1.14426	1.09781	0.857807	1.12656	1.19688	0.641447	0.79267	0.946111	0.992427	1.29725
31	Smar_temp_007363:	4633	0	701	1644	805	1483	141	97	0	0	614	169	265	288	0	96	0	470	302	368	146	0	648	339	260	199	0	0	230	0	0	0.79638	1.11079	0.927706	1.04524	0.893135	1.00822	1.00807	1.19867	0.892592	1.36283	0.905102	0.753164	0.699306	1.17201	0.886862	1.29345
32	Smar_temp_001643:	3240	0	592	1010	671	967	119	93	0	0	354	167	220	236	0	117	0	263	239	205	132	0	353	215	174	169	0	0	183	0	0	0.758549	1.12118	1.05178	0.942869	0.872475	1.12827	0.856341	1.07665	0.913791	1.16504	1.08165	0.945177	0.680066	1.19342	0.956497	1.22658
33	Smar_temp_012453:	3065	576	350	872	427	840	67	61	0	0	295	100	125	156	575	54	1	311	174	254	70	0	325	135	110	116	0	0	134	1	0	1.25102	1.31003	1.02895	1.10469	1.30135	1.28414	1.12629	1.4356	1.14506	1.35575	1.3511	1.04252	1.06284	1.48687	1.20932	1.28143
34	Smar_temp_006587:	3896	0	588	1278	715	1315	139	113	0	0	562	148	200	238	0	99	0	400	263	331	133	0	480	228	197	159	0	0	205	0	0	1.04716	1.14498	0.852731	1.02136	0.927304	1.01475	1.05931	1.2325	0.849456	1.18208	1.11558	0.745723	0.767344	1.08979	0.801148	1.2662
35	Smar_temp_006475:	1255	0	186	395	223	451	43	31	0	0	182	58	47	69	0	30	0	138	102	109	38	0	149	67	60	58	0	0	73	0	0	0.937967	1.19849	0.669637	1.02491	0.972186	0.983085	1.08518	1.14977	0.91093	1.14448	1.08828	0.867725	0.767886	1.27281	0.867725	1.12295
36	Smar_temp_003231:	5810	0	993	1869	1042	1906	190	284	0	0	845	223	256	375	0	177	0	564	312	424	203	0	760	309	288	325	0	0	274	0	0	1.59469	1.26407	0.763729	0.901592	0.919863	1.11874	1.0167	1.13987	0.80156	0.967333	1.04292	0.684556	0.691528	0.912725	0.997671	1.35141
37	Smar_temp_000637:	2347	0	389	753	462	743	103	76	0	0	288	110	119	139	0	71	0	219	164	181	94	0	300	132	114	110	0	0	126	0	0	0.99251	1.24178	0.802829	0.913426	0.918699	0.937758	1.13257	1.22758	0.861495	1.05765	1.10122	0.893238	0.75929	1.12131	0.893238	1.22441
38	Smar_temp_003374:	3399	418	498	996	492	995	54	126	0	0	411	129	124	167	417	61	1	303	188	245	119	1	401	182	167	150	0	0	152	0	0	1.74794	1.37397	0.860099	1.1444	1.03923	1.15836	0.758254	1.65084	1.05537	1.24719	0.836031	0.884888	0.840301	1.30533	1.02894	1.41106
39	Smar_temp_003099:	2643	0	500	831	496	816	84	94	0	0	320	101	149	142	0	111	0	232	169	207	108	0	288	194	161	120	0	0	162	0	0	1.00178	1.10227	0.955434	1.02412	0.904261	0.910548	0.902429	1.15098	1.05789	1.23404	1.17349	0.654272	0.806819	1.1036	0.777353	1.27018
40	Smar_temp_004175:	3670	0	553	1167	732	1218	128	119	0	0	503	148	218	252	0	82	0	349	267	280	134	0	431	203	169	168	0	0	218	0	0	1.07889	1.16145	0.936571	0.961074	0.901101	1.08264	0.876706	1.21488	0.897355	1.15443	0.984078	0.806409	0.722946	1.09905	0.915383	1.24434
41	Smar_temp_007958:	41526	0	7519	13358	6971	13678	1268	996	0	0	5201	2059	2099	1993	0	1432	0	4029	2608	3571	1321	0	4763	3031	2467	2298	0	0	2389	0	0	0.789086	1.10845	0.936043	1.01997	0.9157	0.888773	1.08355	1.04657	1.04044	1.25315	1.05182	0.831369	0.811607	1.13582	0.927871	1.15441
42	Smar_temp_001431:	27176	231	4589	9433	4349	8574	764	547	0	0	3044	1227	1282	1391	230	879	0	2836	1756	2340	727	0	3765	1935	1549	1434	0	0	1467	1	1	0.744844	1.14988	0.849248	0.972454	0.952924	0.921453	1.09774	0.989948	1.06916	1.21478	1.13433	0.847478	0.786263	1.27979	0.990451	1.12529
43	Smar_temp_008665:	2402	0	338	715	439	910	85	65	0	0	403	113	114	127	0	42	0	233	175	211	66	0	258	118	109	121	0	0	161	0	0	1.05222	1.21222	0.872383	1.08337	0.860164	0.971865	1.05941	1.0684	0.968039	1.17282	0.883057	0.882457	0.778947	1.05222	0.944931	1.16895
44	Smar_temp_009477:	496	0	78	142	114	162	30	26	0	0	79	17	18	40	0	11	0	47	40	28	25	0	49	24	27	15	0	0	19	0	0	1.45029	1.20532	0.55152	1.2091	1.01339	1.2256	1.14497	1.39451	0.510288	1.07476	0.896778	0.6673	0.603721	1.07429	0.588794	1.49307
45	Smar_temp_006035:	10963	20	1777	3664	1815	3687	354	312	0	0	1556	461	442	578	19	326	1	1130	707	869	342	0	1537	678	555	554	0	0	540	1	0	1.06052	1.25514	0.728651	0.9345	0.917021	0.952851	1.17809	1.1625	0.884654	1.14161	1.13181	0.771382	0.705213	1.15824	0.926998	1.25485
46	Smar_temp_002553:	3015	435	440	859	429	852	68	45	0	0	344	121	125	136	434	71	0	242	191	155	80	0	363	203	127	162	0	0	145	1	1	0.71877	1.48323	1.0227	1.01308	0.996942	1.11269	1.11399	1.27781	1.19608	1.61934	1.10571	0.973151	0.638537	1.57552	1.3029	1.42878
47	Smar_temp_002683:	1168	0	216	345	244	363	53	80	0	0	155	43	52	70	0	43	0	97	59	85	53	0	140	50	55	64	0	0	68	0	0	1.77292	1.37383	0.721502	0.86205	0.904667	0.971252	1.03977	1.17456	0.896717	0.783682	1.07647	0.640547	0.79275	0.778034	0.953372	1.37392
48	Smar_temp_011986:	189	0	40	57	45	47	4	16	0	0	17	5	9	15	0	6	0	13	16	6	14	0	22	13	12	8	0	0	12	0	0	1.68	1.27978	0.663158	0.994737	0.917133	1.10526	0.373333	1.47	1.07234	1.07763	0.70875	0.50266	0.423292	1.42979	0.804255	1.4545
49	Smar_temp_011623:	7439	773	919	2028	1198	2521	249	93	0	0	1090	309	325	333	772	132	0	695	531	585	188	0	723	385	284	315	0	0	427	1	1	0.628384	1.30773	0.995115	1.13357	1.01125	1.01961	1.29063	1.27028	1.05175	1.53671	1.16267	0.992167	0.851196	1.30791	1.01143	1.27584
50	Smar_temp_002980:	1798	0	222	652	309	615	48	27	0	0	255	69	103	122	0	26	0	192	131	158	40	0	272	100	84	71	0	0	99	0	0	0.707688	1.15044	0.919223	1.04344	0.860931	1.08879	0.903887	1.04843	0.93668	1.24219	0.948543	0.908679	0.708474	1.23945	0.935018	1.21221
51	Smar_temp_001452:	2955	0	403	994	536	1022	92	87	0	0	404	124	147	171	0	59	0	307	209	289	86	0	401	133	139	119	0	0	187	0	0	1.19016	1.1993	0.815312	1.02537	0.893015	0.948424	0.946271	1.17648	1.00875	0.98111	1.07349	0.889658	0.840655	1.12743	0.853785	1.14298
52	Smar_temp_001492:	1930	0	376	602	443	509	99	48	0	0	141	112	141	154	0	80	0	143	155	104	76	0	207	136	111	109	0	0	113	0	0	0.556169	1.10239	1.02041	0.946446	0.900698	1.11449	0.97361	0.880601	0.967195	1.15961	1.09212	1.12946	0.655053	1.32668	1.0992	1.05037
53	Smar_temp_003526:	444	0	105	140	90	109	21	10	0	0	35	30	28	32	0	24	0	27	31	20	20	0	46	41	38	23	0	0	17	0	0	0.469841	1.04204	0.986667	1.14776	0.785583	1.12762	1.15111	0.939683	0.769419	1.23837	0.966531	1.16383	0.581913	1.40306	0.892267	1.30797
54	Smar_temp_001383:	1006	0	137	351	202	316	34	27	0	0	117	35	63	77	0	23	0	98	78	67	25	0	154	52	35	54	0	0	66	0	0	0.981499	1.25749	0.893882	0.732215	0.888853	1.09252	0.838251	0.908795	1.04017	1.08786	1.23278	0.813314	0.607685	1.22929	1.25483	1.17872
55	Smar_temp_003026:	10521	0	1555	3414	1900	3652	368	220	0	0	1506	482	541	624	0	260	0	1110	771	848	353	0	1348	593	415	527	0	0	554	0	0	0.783422	1.2168	0.87748	0.822453	0.936668	1.0121	1.0725	1.25704	0.840006	1.17522	1.13128	0.892982	0.715581	1.16903	0.976352	1.18801
56	Smar_temp_010156:	489	0	114	133	95	147	21	35	0	0	59	22	15	36	0	24	0	43	24	26	15	0	37	33	37	38	0	0	23	0	0	1.58033	1.02284	0.58053	1.19331	1.07549	1.39327	1.13784	0.677285	0.805371	1.06431	0.903047	0.641962	0.650299	0.840387	1.10884	1.33514
57	Smar_temp_009607:	1000	0	159	298	169	374	33	21	0	0	170	49	37	53	0	24	0	113	78	82	41	0	97	65	50	44	0	0	42	0	0	0.781512	1.09229	0.734681	1.05525	1.01389	1.05238	1.15542	1.52581	0.664494	1.37183	0.94933	0.824	0.735743	1.23406	0.739919	1.21536
58	Smar_temp_003223:	9222	224	1271	3005	1640	3082	335	232	0	0	1334	345	468	554	223	206	0	919	604	778	267	0	1185	488	432	365	1	0	484	0	1	1.02642	1.21019	0.875755	1.04308	0.915089	1.03668	1.14864	1.18126	0.883068	1.1783	1.17598	0.812206	0.774689	1.10201	0.85929	1.29514
59	Smar_temp_012201:	2233	0	365	686	453	729	65	53	0	0	252	85	154	125	0	71	0	201	181	179	72	0	225	156	105	117	0	0	191	0	0	0.71577	1.06764	1.10659	0.936399	0.897497	0.898207	0.707303	0.972367	1.29151	1.39122	1.19004	0.713325	0.799264	1.22389	0.98187	1.05885
60	Smar_temp_001518:	1920	0	321	669	275	655	42	41	0	0	266	81	73	91	0	71	0	215	119	166	49	0	283	128	97	104	0	0	93	0	0	0.891759	1.21405	0.761843	0.867245	0.942046	0.949694	1.06631	1.06576	0.991312	1.14441	1.32297	0.739673	0.727347	1.26845	0.949704	1.19042
61	Smar_temp_007505:	1004	0	212	355	158	279	24	57	0	0	91	46	37	46	0	40	0	98	40	72	44	0	167	69	52	76	0	0	44	0	0	1.7085	1.33043	0.662293	0.693702	0.993407	0.823391	0.96523	1.31884	1.00213	0.920489	0.893556	0.780821	0.72985	0.911029	1.29005	1.17373
62	Smar_temp_001916:	5573	0	899	1949	852	1873	150	158	0	0	809	218	238	290	0	175	0	596	306	486	163	0	825	348	290	271	0	0	249	0	0	1.1496	1.21037	0.798757	0.922392	0.909883	0.973275	1.1516	1.18598	0.869583	1.10687	1.20672	0.721519	0.741952	1.06864	0.896935	1.28517
63	Smar_temp_003811:	3976	0	806	1436	782	952	149	186	0	0	261	135	253	308	0	182	0	378	194	275	147	0	549	303	255	222	0	0	178	0	0	1.17332	1.05855	0.895789	0.875986	1.09938	1.09053	0.968767	0.927304	0.950654	1.04088	1.1139	0.699533	0.799812	1.03611	1.15034	1.14502
64	Smar_temp_000164:	3544	0	711	1115	846	872	190	120	0	0	231	175	262	290	0	157	0	261	274	187	160	0	378	259	214	180	0	0	205	0	0	0.707025	1.07755	0.984351	0.956672	0.951356	1.08955	0.94082	0.9427	0.984829	1.15784	1.10066	1.00034	0.681623	1.31631	1.02892	1.07665
65	Smar_temp_006859:	1954	0	341	605	346	662	81	84	0	0	308	82	76	101	0	72	0	168	105	157	60	0	244	103	116	92	0	0	104	0	0	1.39115	1.30258	0.709425	1.09868	0.819635	0.942789	1.32208	0.993677	0.887205	0.975556	1.2099	0.709784	0.765968	0.895735	0.796343	1.37328
66	Smar_temp_001504:	20229	40	3302	6901	3860	6126	708	625	1	1	2407	796	1130	1304	38	521	1	1867	1396	1394	793	0	2843	1359	1061	927	1	0	1055	0	0	0.991951	1.20761	0.858131	0.941891	0.893367	0.990268	0.961243	1.25859	0.902532	1.20644	0.966625	0.796037	0.667034	1.19425	0.927043	1.29747
67	Smar_temp_003952:	4526	0	724	1615	641	1546	84	97	0	0	650	203	207	234	0	122	0	499	252	442	129	0	637	302	271	202	0	0	194	0	0	0.945997	1.10537	0.905012	1.04899	0.904551	1.02306	0.92529	1.25808	0.886031	1.16899	1.05341	0.820848	0.801226	1.15093	0.816804	1.23086
68	Smar_temp_010249:	12042	0	2230	3864	2284	3664	422	525	0	0	1381	534	572	793	0	443	0	1166	765	839	486	0	1504	728	621	679	0	0	583	0	0	1.24124	1.21303	0.780479	0.867857	0.991755	1.08203	0.974134	1.14904	0.83891	1.01739	1.07274	0.787009	0.713622	1.1008	1.00071	1.23874
69	Smar_temp_002310:	3359	0	595	1076	609	1079	103	114	0	0	370	141	163	175	0	148	0	321	229	284	85	0	425	192	166	196	0	0	246	0	0	1.05677	1.23303	0.835542	0.870941	0.928713	0.897054	0.932852	0.787943	1.2575	1.00735	1.40423	0.737719	0.821665	1.1706	1.02548	1.0675
70	Smar_temp_009564:	587	0	95	176	149	167	47	36	0	0	70	12	36	41	0	13	0	48	30	38	24	0	62	34	29	29	0	0	37	0	0	1.4929	1.17491	0.805827	1.01812	0.958628	0.917747	1.24269	0.995267	0.872845	1.19366	0.84554	0.443996	0.758914	0.707712	1.07299	1.47334
71	Smar_temp_003325:	3062	0	441	1051	600	970	121	102	0	0	399	90	182	218	0	77	0	303	195	220	83	0	440	172	125	156	0	0	178	0	0	1.18036	1.2197	0.883736	0.825798	0.910067	1.05854	1.02917	0.960491	0.936488	1.1363	1.21232	0.644225	0.660775	1.02593	1.11666	1.29848
72	Smar_temp_003848:	1413	0	204	431	253	525	45	29	0	0	248	62	89	91	0	34	0	146	90	118	48	0	142	79	53	69	0	0	69	0	0	0.793943	1.08013	1.15328	0.851747	0.911714	1.1792	0.993376	1.31411	0.734026	1.26959	1.15441	0.817983	0.736864	0.957425	0.910336	1.27138
73	Smar_temp_012312:	249	0	49	89	47	64	7	6	0	0	20	10	20	19	0	7	0	19	14	16	6	0	27	26	22	14	0	0	15	0	0	0.648719	0.848756	1.19053	1.25613	0.830583	1.13101	0.789045	0.648719	1.24169	1.48452	0.725948	0.794005	0.699438	1.15891	1.11161	1.21582
74	Smar_temp_006834:	4907	80	664	1554	861	1748	164	122	0	0	783	195	218	281	79	102	1	513	357	388	159	0	639	245	183	219	0	0	257	1	0	1.04714	1.29842	0.7995	0.870258	0.926704	1.03055	1.08556	1.36471	0.837924	1.1651	1.13522	0.824406	0.700899	1.16396	0.925871	1.25746
75	Smar_temp_010494:	7985	0	1329	2565	1400	2691	267	187	0	0	1022	384	382	417	0	241	0	841	564	689	273	0	942	517	400	415	0	0	443	0	0	0.802534	1.14328	0.849421	0.936963	0.972904	0.927247	1.08775	1.17161	0.938938	1.21103	1.08954	0.857368	0.797064	1.1954	0.926583	1.12693
76	Smar_temp_004464:	1507	0	260	549	295	403	53	30	0	0	148	56	126	140	0	42	0	147	86	88	50	0	188	132	87	81	0	0	52	0	0	0.589439	0.939997	1.17244	0.918516	1.00127	1.30271	0.917794	0.982399	0.659158	1.39361	0.936302	0.805421	0.599402	1.09015	1.16498	1.3733
77	Smar_temp_006670:	5679	0	908	1814	1065	1892	168	166	0	0	712	281	284	360	0	110	0	564	447	442	202	0	660	351	305	291	0	0	335	0	0	0.974865	1.13905	0.83484	1.0516	0.933238	1.05825	0.841166	1.18628	0.944161	1.2102	0.757692	0.928905	0.731368	1.25982	0.961962	1.12956
78	Smar_temp_005498:	10497	0	1580	3201	1883	3833	344	266	0	0	1713	478	498	563	0	251	0	1012	775	840	346	0	1212	585	478	505	0	0	630	0	0	0.938511	1.24164	0.867278	0.992088	0.865807	0.980477	1.01841	1.22077	0.916256	1.21417	1.05542	0.828509	0.718654	1.12714	0.875308	1.2239
79	Smar_temp_008352:	38867	100	5726	12473	7074	13494	1368	870	0	1	5715	1787	1864	2234	95	904	2	3782	2969	3014	1261	1	5060	2164	1766	1794	3	2	2209	0	1	0.834803	1.26412	0.82109	0.961058	0.873355	0.984075	1.06252	1.20998	0.899437	1.17765	1.07163	0.898904	0.696005	1.20889	0.902426	1.21988
80	Smar_temp_001846:	360	0	61	132	74	93	14	15	0	0	26	16	17	33	0	10	0	35	28	23	11	0	55	20	24	16	0	0	16	0	0	1.19628	1.13636	0.626536	1.07303	1.02639	1.21622	0.92038	0.877271	0.836966	0.894188	0.967482	1.01534	0.674487	1.46469	1.01534	1.08221
81	Smar_temp_009181:	211	0	34	63	45	69	11	13	0	0	27	9	8	11	0	4	0	16	12	21	6	0	24	7	15	9	0	0	17	0	0	1.79281	1.27589	0.595414	1.47759	0.776628	0.818695	1.14617	0.827451	1.15523	0.689542	0.730104	0.809463	1.01932	0.815459	0.809463	1.1966
82	Smar_temp_005909:	3235	1	553	1105	573	1003	114	143	0	0	447	121	135	218	0	119	1	318	181	202	124	0	513	170	138	172	0	0	117	1	0	1.45993	1.35915	0.689749	0.730577	0.928193	1.11382	1.12323	1.26595	0.658574	0.899986	1.25884	0.705722	0.589607	1.01882	1.00317	1.43741
83	Smar_temp_012422:	2278	0	326	648	426	878	78	49	0	0	390	103	118	127	0	36	0	242	181	198	78	0	184	138	103	109	0	0	143	0	0	0.803753	0.998209	0.973758	1.1107	0.968946	1.04803	0.979105	1.27944	0.870935	1.48813	0.771651	0.819745	0.792774	1.10237	0.867497	1.15247
84	Smar_temp_002169:	777	0	144	269	126	238	15	36	0	0	100	27	33	52	0	26	0	78	42	51	26	0	111	54	47	45	0	0	33	0	0	1.54167	1.1919	0.756506	0.942766	0.946643	1.19207	0.734127	1.11343	0.855042	1.08318	0.974248	0.612132	0.618959	1.08824	1.02022	1.37173
85	Smar_temp_010128:	3119	0	578	902	553	1086	108	131	0	0	537	125	112	146	0	118	0	264	202	183	140	0	369	204	156	164	0	0	159	0	0	1.2783	1.41458	0.700328	0.933266	0.840588	0.912928	1.10151	1.36613	0.825767	1.22043	1.10165	0.621109	0.58268	1.04909	0.814895	1.42014
86	Smar_temp_010185:	13655	0	2568	4145	2561	4381	498	708	0	0	1867	587	560	768	0	464	0	1221	795	848	589	0	1719	809	644	871	0	0	706	0	0	1.47001	1.36621	0.720353	0.826148	0.918141	0.987913	1.03682	1.22293	0.859238	1.03782	0.96077	0.712462	0.637661	0.967556	1.05716	1.32828
87	Smar_temp_006295:	1428	0	312	470	234	412	45	57	0	0	140	85	71	61	0	67	0	130	61	126	71	0	179	103	89	85	0	0	57	0	0	1.11489	1.15714	0.921877	0.866694	0.958686	0.792035	1.17357	1.38872	0.844287	1.00303	0.982865	0.944268	0.929188	0.903535	0.944268	1.17777
88	Smar_temp_006648:	3299	0	536	1051	634	1078	124	81	0	0	398	145	158	197	0	73	0	337	271	258	116	0	360	236	196	151	0	0	197	0	0	0.786345	1.07518	0.782253	1.14781	0.981275	0.975341	1.01771	1.12612	0.950912	1.38206	0.838254	0.827879	0.751243	1.30811	0.862136	1.12987
89	Smar_temp_011708:	8429	0	1338	2969	1339	2783	250	183	0	0	1159	393	403	442	0	237	0	839	503	729	255	0	1273	524	454	392	0	0	392	0	0	0.860975	1.21726	0.854457	0.963309	0.855883	0.937147	1.17532	1.19972	0.886683	1.11184	1.11587	0.889609	0.74367	1.13776	0.887346	1.26134
90	Smar_temp_010765:	11813	20	2201	3844	2093	3655	352	555	0	0	1538	502	581	750	19	451	1	1037	605	794	413	0	1605	693	620	717	0	0	578	1	0	1.42319	1.28312	0.853068	0.865662	0.871903	1.10121	0.949215	1.05906	0.892548	0.967587	1.09976	0.737151	0.66759	0.934241	1.05286	1.36001
91	Smar_temp_000028:	2844	145	572	732	625	770	144	70	0	0	249	141	185	172	144	166	0	201	225	163	130	0	201	195	143	133	1	0	179	0	1	0.556867	1.06685	1.15003	0.971311	1.0142	1.06922	1.04841	1.03418	1.05782	1.32452	1.44293	0.910462	0.822461	1.32966	0.858805	1.19439
92	Smar_temp_000650:	8965	0	1310	2962	1655	3038	287	271	0	0	1304	362	503	600	0	169	0	892	594	711	289	0	1143	508	423	429	0	0	479	0	0	1.1206	1.16796	0.919889	0.977314	0.888674	1.09728	0.939369	1.19503	0.854083	1.1737	0.882865	0.815455	0.708349	1.05913	0.966381	1.26664
93	Smar_temp_002593:	5263	0	719	1914	768	1862	139	164	0	0	913	192	173	330	0	98	0	549	291	379	91	0	940	265	251	279	0	0	208	0	0	1.5631	1.35045	0.619407	0.959923	0.810745	1.18153	1.2403	0.867331	0.765519	1.01346	0.997704	0.75479	0.559694	1.07099	1.0968	1.38594
94	Smar_temp_004269:	2470	0	394	840	410	826	74	59	0	0	302	110	119	115	0	66	0	272	158	233	78	0	332	159	117	133	0	0	142	0	0	0.90213	1.16219	0.853455	0.873187	0.968292	0.824768	1.08733	1.19265	1.03567	1.18664	1.05014	0.834859	0.829456	1.15237	1.00942	1.09331
95	Smar_temp_005118:	2637	0	369	1025	513	730	74	83	0	0	293	85	192	255	0	45	0	253	163	178	85	0	436	156	143	96	0	0	99	0	0	1.15623	1.09433	0.962875	0.997002	0.891628	1.27882	0.741493	1.18409	0.697116	1.08764	0.871505	0.832108	0.627312	1.14778	0.939793	1.44988
96	Smar_temp_004291:	2728	0	502	906	545	775	127	103	0	0	264	107	158	155	0	89	0	252	157	203	112	0	345	203	151	150	0	0	151	0	0	1.02703	1.14659	0.872925	0.90571	0.979073	0.85635	1.16642	1.11677	0.975266	1.21761	0.963445	0.750279	0.788698	1.01402	1.05179	1.19907
97	Smar_temp_000221:	7198	0	1144	2294	1108	2652	237	219	0	0	1249	292	258	345	0	226	0	796	394	599	211	0	943	406	297	410	0	0	315	0	0	1.24363	1.28984	0.730631	0.814608	0.941798	0.977007	1.38957	1.1982	0.77163	1.11357	1.24299	0.69278	0.708715	0.96515	0.972739	1.27828
98	Smar_temp_004371:	2237	0	419	736	405	677	86	60	0	0	247	105	124	107	0	96	0	207	135	196	94	0	276	157	129	99	0	0	118	0	0	0.790948	1.13978	0.930582	0.935759	0.92933	0.803003	1.17288	1.23915	0.96273	1.13887	1.22323	0.828042	0.879945	1.10143	0.780726	1.20555
99	Smar_temp_003915:	6343	0	1046	2132	1082	2083	228	108	0	0	877	270	283	306	0	218	0	627	463	472	238	0	903	450	319	271	0	0	309	0	0	0.605284	1.26011	0.778156	0.907333	0.895542	0.841398	1.23531	1.33387	0.869634	1.27994	1.26383	0.786027	0.674156	1.30304	0.788938	1.28208
100	Smar_temp_001420:	2868	0	543	868	569	888	87	139	0	0	323	144	141	183	0	80	0	253	202	200	131	0	304	180	169	163	0	0	168	0	0	1.29027	1.15721	0.818778	1.02836	0.941384	1.06267	0.77068	1.21601	0.953593	1.0953	0.778161	0.856503	0.744177	1.14658	0.969514	1.17478
101	Smar_temp_000997:	3948	0	614	1375	633	1326	120	87	0	0	548	178	194	192	0	98	0	409	232	363	130	0	568	251	203	183	0	0	191	0	0	0.88374	1.1861	0.879979	0.949297	0.885634	0.870907	1.18236	1.32053	0.898387	1.17376	1.02628	0.863148	0.786027	1.09123	0.887394	1.23047
102	Smar_temp_008685:	5205	0	678	1863	1038	1626	211	165	0	0	677	172	329	368	0	94	0	480	333	434	162	0	813	247	240	182	0	0	297	0	0	1.22033	1.21923	0.885536	0.988984	0.824762	0.990509	1.01932	1.19814	0.915924	1.01783	1.06436	0.81208	0.745722	1.02694	0.859294	1.33281
103	Smar_temp_010222:	3328	0	665	1066	558	1039	91	86	0	0	411	181	184	148	0	124	0	287	197	235	159	0	408	274	186	196	0	0	160	0	0	0.771305	1.19489	1.02946	0.873207	0.862368	0.828044	0.972649	1.42602	0.918446	1.28634	0.933172	0.871816	0.70612	1.13084	0.944066	1.26705
104	Smar_temp_011226:	5098	0	807	1514	988	1789	198	204	0	0	786	209	233	296	0	108	0	464	352	375	164	0	558	285	259	276	0	0	330	0	0	1.30437	1.24103	0.794096	1.08069	0.873336	1.00881	1.03407	1.04861	0.951802	1.18917	0.845428	0.73801	0.705821	1.01526	0.974597	1.25199
105	Smar_temp_000982:	23937	0	3362	7952	4323	8300	741	644	0	0	3620	939	1356	1507	0	494	0	2415	1582	2051	750	0	3109	1285	1072	1046	0	0	1325	0	0	1.06065	1.17689	0.944208	0.959821	0.875855	1.04935	0.949112	1.23523	0.883939	1.15053	1.04617	0.805489	0.743842	1.05539	0.897275	1.25783
106	Smar_temp_012914:	11981	0	1764	4034	2004	4179	377	408	0	0	1944	413	513	705	0	309	0	1164	706	862	265	0	1833	634	524	666	0	0	657	0	0	1.38279	1.34953	0.760286	0.882246	0.827252	1.04484	1.12471	0.898137	0.939914	1.06745	1.18975	0.671231	0.612621	1.01001	1.08242	1.33366
107	Smar_temp_008242:	3882	0	560	1126	797	1399	136	215	0	0	720	101	150	333	0	92	0	394	296	212	144	0	429	151	153	171	0	0	184	0	0	1.87003	1.31352	0.648859	0.941934	0.970947	1.44047	0.831147	1.25248	0.640615	0.929621	1.13885	0.500462	0.522439	1.03056	0.847317	1.42808
108	Smar_temp_012612:	2897	0	309	903	476	1209	63	70	0	0	533	103	100	190	0	45	0	403	243	316	53	0	305	91	94	117	0	0	170	0	0	1.37874	1.08361	0.673991	0.975956	1.0694	1.28058	0.805518	1.0439	0.855784	0.944808	1.36535	0.798732	0.838536	1.22327	0.907297	1.05639
109	Smar_temp_002845:	11243	63	1725	3737	1968	3750	450	281	0	1	1639	472	470	663	62	342	0	1074	767	754	291	0	1690	630	501	590	0	0	564	0	1	0.930624	1.36058	0.718508	0.873791	0.861652	1.01356	1.3063	0.963742	0.859221	1.09878	1.2922	0.820359	0.604922	1.16848	1.02545	1.31038
110	Smar_temp_012208:	9231	0	1549	2865	1769	3048	384	347	0	0	1257	402	439	527	0	275	0	891	599	722	359	0	1090	525	445	470	0	0	498	0	0	1.16896	1.22582	0.799578	0.92562	0.941861	0.959858	1.13272	1.20938	0.85258	1.09202	1.05798	0.785974	0.763214	1.02549	0.918925	1.24898
111	Smar_temp_002850:	3146	0	461	1018	553	1114	120	74	0	0	481	117	145	183	0	82	0	345	214	265	79	0	381	188	146	154	0	0	171	0	0	0.913197	1.15661	0.810315	0.97873	0.957073	1.02267	1.2345	0.974899	0.873262	1.26028	1.21387	0.716735	0.735143	1.09285	0.943394	1.21936
112	Smar_temp_000605:	3373	0	525	1146	617	1085	121	157	0	0	498	120	159	258	0	88	0	318	180	202	89	0	527	159	142	205	0	0	149	0	0	1.63483	1.3535	0.758479	0.796087	0.862639	1.23074	1.07209	0.926748	0.750737	0.891394	1.07691	0.710573	0.547966	0.90693	1.2139	1.42688
113	Smar_temp_004193:	7772	0	1152	2519	1408	2693	236	222	0	0	1198	279	450	457	0	217	0	752	499	668	251	0	960	434	356	328	0	0	464	0	0	1.06373	1.17584	0.986085	0.953459	0.861561	1.00142	0.925208	1.20268	0.951068	1.16236	1.27083	0.698953	0.765323	1.02281	0.821709	1.28386
114	Smar_temp_004051:	2613	0	451	839	505	818	111	103	0	0	331	102	128	182	0	76	0	258	163	174	85	0	312	170	140	150	0	0	127	0	0	1.1817	1.15816	0.789398	0.966783	0.982299	1.12243	1.13731	0.975193	0.803338	1.17395	0.976337	0.722453	0.662481	1.03106	1.06243	1.29259
115	Smar_temp_008711:	3131	0	486	986	617	1042	120	102	0	0	443	134	169	201	0	82	0	295	225	242	126	0	376	167	146	132	0	0	170	0	0	1.06503	1.21092	0.869777	0.953944	0.899002	1.03447	0.986947	1.31563	0.827902	1.09115	1.08699	0.828484	0.737486	1.09575	0.816118	1.27747
116	Smar_temp_005346:	9762	0	1541	3453	1541	3227	249	104	0	0	1261	497	459	596	0	227	0	1031	729	747	257	0	1396	713	567	490	0	0	438	0	0	0.42753	1.14296	0.842078	1.04021	0.903237	1.09342	1.02361	1.05649	0.859827	1.30806	0.933167	0.975649	0.654431	1.43108	0.961907	1.1821
117	Smar_temp_012542:	2709	0	370	907	460	972	83	92	0	0	430	86	113	147	0	59	0	299	172	246	72	0	380	133	115	124	0	0	157	0	0	1.46432	1.25135	0.733706	0.92832	0.91877	0.954468	1.0626	1.14599	0.951228	1.07362	1.1675	0.647798	0.755911	1.04211	0.934034	1.23295
118	Smar_temp_002989:	1035	0	162	332	208	333	39	39	0	0	131	45	62	69	0	20	0	95	68	87	38	0	117	58	57	47	0	0	62	0	0	1.19792	1.09863	0.929246	1.09689	0.889368	1.03416	0.932993	1.1672	0.926455	1.11613	0.788752	0.863363	0.814474	1.01611	0.901735	1.22271
119	Smar_temp_005975:	4916	0	933	1507	1036	1440	194	166	0	0	511	261	334	377	0	198	0	393	342	294	190	0	528	308	251	293	0	0	275	0	0	0.844265	1.14293	1.05168	0.877588	0.890284	1.18708	0.888575	0.966327	0.906196	1.07688	1.11819	0.955011	0.666014	1.12698	1.0721	1.21146
120	Smar_temp_005836:	1643	0	275	575	242	551	35	33	0	0	215	92	84	93	0	55	0	167	90	150	38	0	237	95	86	96	0	0	76	0	0	0.814711	1.17774	0.991822	0.893584	0.866033	1.09809	0.981917	0.938152	0.936449	0.987099	1.19491	0.997565	0.777874	1.10895	1.04094	1.16352
121	Smar_temp_011968:	22512	20	3349	7550	3706	7887	754	489	0	1	3485	940	910	1183	19	580	0	2275	1552	1818	582	0	3209	1340	1156	1031	0	1	1186	0	0	0.886957	1.26733	0.732155	1.02922	0.860076	0.951802	1.23588	1.05564	0.913443	1.19304	1.16416	0.801152	0.687304	1.19533	0.87871	1.26123
122	Smar_temp_010115:	366	0	56	112	78	120	13	8	0	0	48	14	25	28	0	7	0	35	32	24	14	0	32	27	19	16	0	0	23	0	0	0.67033	0.933673	1.04739	1.10874	0.953125	1.17308	0.782051	1.17308	0.899359	1.57557	0.816964	0.7625	0.653571	1.25128	0.871429	1.22
123	Smar_temp_003598:	1134	0	190	359	218	367	39	38	0	0	134	43	57	61	0	30	0	116	84	90	44	0	129	78	57	59	0	0	74	0	0	1.04037	1.13505	0.825918	0.947632	0.998414	0.883877	0.930603	1.20464	1.04887	1.29676	0.942382	0.699297	0.774631	1.19061	0.959501	1.1282
124	Smar_temp_006998:	1736	0	270	576	305	585	54	55	0	0	257	61	100	109	0	47	0	175	96	143	50	0	217	107	84	88	0	0	92	0	0	1.15944	1.13544	0.98816	0.937654	0.901591	1.07709	1.00773	1.05404	0.895121	1.19439	1.11923	0.67044	0.736728	0.93404	0.967192	1.30368
125	Smar_temp_009524:	11389	0	1594	3714	2084	3997	418	278	0	0	1736	466	583	668	0	248	0	1143	805	951	347	0	1493	602	495	504	0	0	651	0	0	0.953113	1.23271	0.857856	0.952271	0.876912	0.98293	1.09614	1.18968	0.890092	1.15812	1.11163	0.833008	0.729609	1.10065	0.900935	1.23756
126	Smar_temp_008760:	2039	0	270	632	327	810	65	34	0	0	362	91	83	89	0	33	0	238	145	210	54	0	220	112	91	92	0	0	119	0	0	0.785208	1.12307	0.818899	1.08737	0.947965	0.878097	1.23947	1.24709	0.916076	1.3383	0.923004	0.848418	0.836439	1.11623	0.857741	1.12501
127	Smar_temp_007199:	1150	0	221	362	205	362	38	58	0	0	145	42	44	67	0	37	0	117	65	78	42	0	132	84	68	74	0	0	58	0	0	1.47224	1.15839	0.681849	0.977476	1.02675	1.03827	1.03986	1.06611	0.898801	1.20747	0.871194	0.603735	0.684503	1.00728	1.06372	1.27247
128	Smar_temp_004784:	3924	0	575	1240	686	1423	127	139	0	0	712	136	184	244	0	104	0	380	236	283	120	0	517	196	158	192	0	0	195	0	0	1.38278	1.3194	0.848791	0.869554	0.845057	1.12557	1.05897	1.19376	0.783853	1.07869	1.23432	0.652222	0.629345	0.948663	0.920783	1.37975
129	Smar_temp_011161:	3458	0	583	1127	734	1014	151	179	0	0	426	125	221	271	0	89	0	291	183	222	140	0	443	190	171	183	0	0	172	0	0	1.44648	1.20609	0.923841	0.899971	0.880554	1.13285	0.969192	1.13133	0.799134	0.999968	0.905478	0.731187	0.671763	0.850241	1.07046	1.43271
130	Smar_temp_003556:	2503	0	409	885	396	813	61	76	0	0	313	116	102	170	0	78	0	281	157	215	62	0	360	139	141	128	0	0	103	0	0	1.17451	1.15047	0.728488	0.97502	0.977537	1.21415	0.973644	0.958151	0.800778	0.96119	1.1671	0.873182	0.747938	1.2206	0.963512	1.18529
131	Smar_temp_007750:	2766	20	500	891	450	905	85	75	0	0	397	119	109	135	19	122	1	250	181	192	91	0	378	184	153	134	0	0	139	1	0	0.922	1.31701	0.751949	0.949939	0.857563	0.931313	1.16104	1.11869	0.944074	1.14241	1.34981	0.727412	0.658608	1.22933	0.819103	1.34074
132	Smar_temp_001376:	5907	0	1088	2034	971	1814	204	191	0	0	687	259	242	322	0	252	0	604	334	485	181	0	841	386	346	308	0	0	264	0	0	1.06795	1.20077	0.723789	0.923556	0.966976	0.963058	1.27808	1.01204	0.885349	1.03033	1.25751	0.775176	0.776462	1.1201	0.921831	1.23324
133	Smar_temp_003012:	5083	0	718	1672	899	1794	149	131	0	0	758	227	246	297	0	93	0	508	373	444	153	0	664	267	253	219	0	0	300	0	0	1.03159	1.2073	0.831877	1.07122	0.860845	1.00434	0.937102	1.20483	0.945495	1.1305	0.916968	0.895775	0.752392	1.17557	0.864206	1.19714
134	Smar_temp_007904:	7076	237	967	2319	1189	2364	232	123	0	0	998	304	346	422	236	158	0	724	488	551	197	0	962	382	285	327	0	0	338	1	1	0.75698	1.26579	0.887935	0.899302	0.934498	1.08297	1.16121	1.2124	0.850893	1.20538	1.19562	0.940995	0.711199	1.22851	1.01219	1.26364
135	Smar_temp_009023:	11597	0	1964	3662	1879	4092	341	407	0	0	1716	524	445	546	0	348	0	1204	686	970	344	0	1461	685	552	719	0	0	648	0	0	1.279	1.26345	0.749999	0.890072	0.93179	0.920223	1.12007	1.08103	0.977368	1.10453	1.04627	0.756136	0.750695	1.03468	1.03752	1.18848
136	Smar_temp_009260:	1235	20	221	447	213	334	43	66	0	0	138	33	55	79	19	50	1	117	49	77	45	0	217	72	57	69	0	0	46	1	0	1.73157	1.34126	0.713415	0.712594	0.967829	1.02472	1.17051	1.18061	0.798544	0.900118	1.26431	0.552131	0.636948	0.850623	1.15446	1.52775
137	Smar_temp_003349:	4178	0	609	1409	670	1490	105	125	0	0	647	173	199	238	0	88	0	462	241	397	119	0	550	223	197	205	0	0	208	0	0	1.27993	1.15747	0.880716	0.959194	0.919418	1.05332	0.977256	1.21849	0.870504	1.08579	0.991326	0.796546	0.790063	1.00861	0.943884	1.21759
138	Smar_temp_010523:	4851	0	908	1596	783	1564	116	175	0	0	614	207	188	218	0	184	0	473	304	393	178	0	642	342	293	253	0	0	270	0	0	1.19405	1.22265	0.729784	0.980799	0.919227	0.846239	0.917837	1.21452	1.06954	1.14482	1.08262	0.707097	0.763755	1.20422	0.86423	1.21766
139	Smar_temp_012049:	34022	312	4792	10612	6194	12112	1341	621	0	2	5365	1514	1666	1914	306	839	1	3277	2566	2565	986	0	4311	1818	1353	1614	0	0	1953	4	5	0.711809	1.3024	0.862316	0.905198	0.867408	0.99068	1.18918	1.13018	0.885676	1.2163	1.24305	0.887469	0.678944	1.16367	0.946086	1.24422
140	Smar_temp_009541:	2181	0	324	740	344	773	43	30	0	0	300	116	118	106	0	44	0	225	152	221	63	0	279	134	117	100	0	0	132	0	0	0.587048	1.11121	1.01099	1.0643	0.857881	0.908179	0.792515	1.2328	1.08266	1.21894	0.914152	1.01016	0.84263	1.2467	0.870826	1.09501
141	Smar_temp_009783:	27042	0	4028	9048	4491	9475	689	572	0	0	3812	1237	1315	1480	0	598	0	2911	1915	2439	807	0	3508	1620	1314	1309	0	0	1515	0	0	0.855071	1.15876	0.875123	0.974972	0.918225	0.984929	0.923787	1.20637	0.962785	1.20202	0.996692	0.876476	0.769341	1.21699	0.927491	1.14824
142	Smar_temp_011057:	3675	0	627	1195	680	1173	134	107	0	0	454	182	192	238	0	107	0	353	247	274	124	0	451	231	198	198	0	0	184	0	0	0.922284	1.16064	0.868324	0.971152	0.925478	1.07636	1.06499	1.06882	0.847751	1.13301	1.00024	0.909417	0.71836	1.13801	0.989366	1.2126
143	Smar_temp_012031:	2573	0	425	813	561	774	134	109	0	0	320	87	156	182	0	73	0	223	162	162	101	0	312	156	121	130	0	0	144	0	0	1.17629	1.21454	0.880057	0.901043	0.911828	1.02673	1.09552	1.08996	0.853294	1.16168	1.03988	0.680502	0.662405	0.959955	1.01684	1.37438
144	Smar_temp_001841:	3068	0	605	1038	614	811	129	61	0	0	267	170	201	227	0	129	0	249	223	168	133	0	397	245	190	153	0	0	125	0	0	0.503804	1.13045	0.967577	0.928231	0.907479	1.09274	1.0498	1.09846	0.770151	1.19693	1.08127	1.06299	0.612275	1.37395	0.956689	1.24545
145	Smar_temp_006390:	2759	0	595	918	531	715	98	128	0	0	253	110	158	193	0	114	0	231	147	151	120	0	332	242	197	164	0	0	120	0	0	1.11776	1.08694	0.894276	0.995081	0.97099	1.09238	0.958934	1.0479	0.872032	1.22238	0.888429	0.713381	0.634717	1.06824	1.06359	1.3654
146	Smar_temp_008388:	780	0	155	223	218	184	57	43	0	0	59	30	59	77	0	38	0	46	59	31	35	0	70	44	47	35	0	0	49	0	0	0.992601	1.09795	0.946641	1.06061	0.874439	1.23545	0.935527	0.807931	0.952832	0.992912	1.23371	0.820477	0.589296	1.14729	0.957223	1.35929
147	Smar_temp_010460:	4283	0	666	1510	676	1431	137	70	0	0	549	240	201	243	0	108	0	459	267	385	113	0	634	248	215	230	0	0	183	0	0	0.665925	1.19092	0.843375	0.915662	0.909796	1.0196	1.28403	1.07499	0.810238	1.05621	1.04285	1.07856	0.763119	1.18215	1.03362	1.14826
148	Smar_temp_003019:	4349	0	879	1267	704	1499	103	130	0	0	632	296	197	202	0	161	0	345	274	291	173	0	481	292	243	302	0	0	226	0	0	0.913632	1.30311	0.96052	0.948921	0.790006	0.984899	0.903819	1.21583	0.931373	1.14027	0.906228	0.976991	0.666353	1.12919	0.996795	1.22322
149	Smar_temp_005844:	5107	0	750	1503	947	1907	199	158	0	0	865	219	245	245	0	122	0	499	345	461	179	0	545	251	213	236	0	0	324	0	0	1.13609	1.2321	0.879069	0.964995	0.889113	0.879069	1.13323	1.28709	0.916242	1.13715	1.10765	0.781984	0.821405	0.975628	0.842686	1.21473
150	Smar_temp_000914:	1994	0	340	642	381	631	62	90	0	0	242	90	106	122	0	43	0	193	123	158	92	0	245	117	97	108	0	0	105	0	0	1.38536	1.18528	0.864114	0.8861	0.949988	0.994546	0.851661	1.41615	0.870884	1.0688	0.741713	0.836487	0.77771	1.02018	1.00378	1.21194
151	Smar_temp_003786:	14257	40	2223	4734	2275	4985	340	330	0	0	2129	685	703	669	38	349	1	1399	902	1293	494	1	1912	859	719	660	0	0	771	1	1	0.930296	1.21635	0.930623	0.974068	0.845186	0.885614	0.936579	1.39263	0.96925	1.16373	1.00687	0.88128	0.781148	1.13393	0.849117	1.22144
152	Smar_temp_004588:	6792	20	1048	2310	1179	2235	223	196	0	0	892	281	338	392	19	175	1	713	422	584	215	0	936	396	322	336	0	0	349	1	0	1.0774	1.19138	0.842924	0.9034	0.937989	0.977593	1.08962	1.18185	0.899563	1.11101	1.08221	0.814827	0.768283	1.08772	0.974312	1.21285
153	Smar_temp_006516:	3292	0	617	1134	514	1027	83	110	0	0	406	110	131	156	0	126	0	346	190	255	110	0	451	271	205	176	0	0	165	0	0	1.14184	1.15454	0.739869	0.964529	0.978031	0.881066	1.03422	1.14184	1.02899	1.27506	1.08958	0.571475	0.720803	1.18489	0.914359	1.2672
154	Smar_temp_007018:	21136	0	3210	6683	3853	7390	701	743	0	0	3206	872	992	1244	0	490	0	2085	1417	1697	681	0	2636	1105	969	1070	0	0	1227	0	0	1.26972	1.24746	0.814262	0.954707	0.892304	1.02111	0.998028	1.16377	0.910802	1.0887	1.0051	0.776944	0.726254	1.05184	0.95336	1.24079
155	Smar_temp_012993:	3782	0	492	1272	546	1472	89	38	0	0	688	159	139	180	0	78	0	425	279	333	77	0	542	217	166	171	0	0	200	0	0	0.534992	1.26691	0.756931	1.00318	0.858451	0.980199	1.12908	1.08406	0.941133	1.31138	1.21867	0.83032	0.672622	1.31288	0.892986	1.20087
156	Smar_temp_006355:	1879	0	300	630	317	632	60	50	0	0	225	95	96	97	0	39	0	208	111	189	55	0	227	116	99	107	0	0	104	0	0	0.987907	1.07466	0.90323	0.984238	0.981595	0.912638	1.12191	1.0867	0.975402	1.15325	0.814233	0.941482	0.89193	1.04105	1.06041	1.05846
157	Smar_temp_001295:	2197	0	320	751	362	764	58	62	0	0	324	80	106	117	0	53	0	232	135	203	58	0	306	125	107	102	0	0	128	0	0	1.17588	1.19199	0.856618	0.978192	0.888351	0.945513	0.972391	1.10002	1.01681	1.14275	1.13712	0.718914	0.777307	1.07241	0.916615	1.21952
158	Smar_temp_002170:	4045	0	631	1390	684	1340	99	89	0	0	480	167	204	218	0	96	0	470	292	375	145	0	518	279	198	192	0	0	222	0	0	0.83411	1.08447	0.867916	0.913145	1.0207	0.927479	0.855936	1.35894	0.979739	1.2867	0.975284	0.798915	0.814386	1.28867	0.918514	1.08131
159	Smar_temp_008870:	6928	0	968	2257	1183	2520	214	113	0	0	1135	309	363	395	0	145	0	709	493	579	207	0	882	401	303	313	0	0	366	0	0	0.683638	1.19954	0.941886	0.960823	0.863619	1.02492	1.05938	1.25233	0.850558	1.27158	1.07207	0.877588	0.705268	1.1457	0.888948	1.23823
160	Smar_temp_001881:	2043	0	299	692	338	714	57	40	0	0	273	96	86	115	0	30	0	233	155	187	54	0	257	133	116	99	0	0	111	0	0	0.808613	1.09645	0.75118	1.14538	0.96343	1.00448	1.01932	1.09163	0.939672	1.31324	0.685563	0.918693	0.773225	1.31216	0.947402	1.09404
161	Smar_temp_004849:	3857	0	569	1547	546	1195	88	35	0	0	447	145	202	218	0	101	0	463	221	361	100	0	679	288	202	166	0	0	140	0	0	0.434523	1.09431	0.922397	0.885112	0.96599	0.995459	1.13854	1.24149	0.827594	1.26194	1.20322	0.822503	0.75318	1.30642	0.941624	1.20732
162	Smar_temp_004011:	917	0	131	321	143	322	23	23	0	0	142	37	49	56	0	18	0	99	48	83	20	0	128	53	44	49	0	0	44	0	0	1.12587	1.13912	0.978868	0.959502	0.878302	1.11871	1.0314	0.979021	0.876254	1.15576	0.961832	0.804348	0.736354	0.955914	1.06522	1.25587
163	Smar_temp_006047:	1287	0	194	417	212	464	39	40	0	0	211	60	64	71	0	26	0	135	68	112	44	0	166	68	51	73	0	0	58	0	0	1.2517	1.22861	0.931723	0.811355	0.897963	1.03363	1.11679	1.37687	0.758844	1.08181	0.889096	0.857847	0.744976	0.88968	1.04371	1.26132
164	Smar_temp_012128:	4253	0	726	1397	821	1309	164	155	0	0	501	182	208	292	0	136	0	407	294	286	146	0	566	253	215	228	0	0	219	0	0	1.10598	1.23344	0.771293	0.901573	0.946572	1.08278	1.03479	1.04176	0.866676	1.06092	1.09739	0.814499	0.665159	1.16348	1.02036	1.24352
165	Smar_temp_005438:	2636	0	461	878	505	792	89	141	0	0	332	90	131	185	0	64	0	232	144	156	94	0	371	166	143	160	0	0	137	0	0	1.59651	1.26862	0.778809	0.931292	0.879455	1.09984	0.919925	1.06434	0.90292	1.08108	0.793823	0.649773	0.591358	0.949055	1.15515	1.39519
166	Smar_temp_006061:	22078	648	3652	6690	3851	7237	713	770	0	1	3197	929	983	1248	646	664	2	1977	1385	1484	757	0	2667	1289	1062	1169	0	0	1133	1	0	1.20878	1.31562	0.842391	0.959682	0.901533	1.06948	1.06146	1.18837	0.897548	1.16481	1.09917	0.776044	0.67672	1.09718	0.976528	1.34768
167	Smar_temp_011157:	1703	0	283	591	298	531	67	49	0	0	185	75	85	87	0	56	0	181	97	161	54	0	239	103	85	88	0	0	90	0	0	0.989482	1.1653	0.821921	0.865485	0.982226	0.84126	1.28486	1.09045	0.968604	1.04876	1.19078	0.849953	0.873692	1.04394	0.997278	1.11737
168	Smar_temp_012160:	1987	0	385	564	415	623	152	80	0	0	277	84	78	68	0	104	0	171	105	147	104	0	232	117	82	94	0	0	91	0	0	0.994899	1.4492	0.662164	0.750364	0.967001	0.577271	1.75366	1.29337	0.699364	1.07064	1.39415	0.69587	0.831281	0.806958	0.778712	1.41808
169	Smar_temp_006077:	11738	0	1765	3954	1925	4094	316	213	0	0	1736	519	581	601	0	288	0	1174	814	1025	343	0	1583	745	615	519	0	0	665	0	0	0.735865	1.18851	0.895989	1.0344	0.85129	0.926832	1.00097	1.18498	0.990461	1.25305	1.08517	0.84308	0.743248	1.21238	0.84308	1.21576
170	Smar_temp_008300:	3115	302	384	777	395	1257	67	71	0	0	663	144	99	112	301	66	1	305	158	291	71	1	270	103	102	144	0	0	145	0	0	1.4581	1.39309	1.00479	1.06489	0.972751	1.13673	1.33764	1.4581	0.909691	1.07533	1.39425	0.929296	0.9281	0.991249	0.929296	1.30708
171	Smar_temp_006300:	2052	0	373	662	376	641	101	62	0	0	248	79	92	95	0	74	0	205	120	167	71	0	242	158	122	106	0	0	109	0	0	0.907136	1.13312	0.758437	1.01384	0.991323	0.783168	1.46596	1.03882	0.928021	1.31301	1.09142	0.678012	0.807566	1.02167	0.909738	1.23855
172	Smar_temp_007757:	4338	0	637	1394	685	1622	132	143	0	0	808	165	166	230	0	123	0	441	244	372	115	0	585	206	201	198	0	0	208	0	0	1.42166	1.30593	0.754127	0.981936	0.846086	1.04487	1.22034	1.14329	0.812104	1.00636	1.31497	0.692761	0.713705	0.95266	0.831313	1.33229
173	Smar_temp_010632:	91823	20	14168	28567	16700	32368	3134	2234	0	1	13778	4589	4823	5222	19	2257	0	8830	6509	7408	3173	0	10848	5088	4065	4673	0	1	5170	0	0	0.866981	1.2206	0.928298	0.922229	0.876863	1.0051	1.03185	1.23139	0.878233	1.15432	1.03244	0.918851	0.735651	1.10569	0.93567	1.20755
174	Smar_temp_005819:	2388	0	416	705	478	789	90	76	0	0	290	101	106	132	0	69	0	228	205	176	86	0	227	170	144	117	0	0	170	0	0	0.912697	1.09064	0.751144	1.1725	0.97882	0.935387	0.940635	1.03279	1.07641	1.38421	0.952131	0.734827	0.755581	1.29803	0.851236	1.11244
175	Smar_temp_009793:	9285	0	1354	3102	1560	3269	244	261	0	0	1365	413	418	562	0	211	0	1003	636	837	265	0	1234	469	447	431	0	0	488	0	0	1.14731	1.19073	0.802032	0.988164	0.918388	1.07833	0.930942	1.16489	0.88851	1.0368	1.06863	0.86636	0.766391	1.15798	0.904119	1.186
176	Smar_temp_011567:	9490	0	1400	2984	1758	3348	309	218	0	0	1409	431	475	573	0	238	0	915	756	733	283	0	1164	513	429	450	0	0	593	0	0	0.840574	1.24057	0.859295	0.974533	0.869167	1.03658	0.948827	1.0912	0.956129	1.16535	1.15236	0.87263	0.696283	1.21894	0.911098	1.19291
177	Smar_temp_002657:	1289	0	275	363	363	288	85	54	0	0	83	54	119	117	0	70	0	81	105	44	91	0	104	97	58	56	0	0	70	0	0	0.69728	1.01736	1.16409	0.748931	0.998709	1.14453	0.831493	1.17505	0.863082	1.25252	1.19312	0.878864	0.542508	1.29462	0.911414	1.28987
178	Smar_temp_012367:	5606	0	917	1781	969	1939	181	208	0	0	834	218	236	317	0	160	0	602	344	466	186	0	668	330	275	295	0	0	285	0	0	1.31227	1.1806	0.766615	0.943958	0.977255	1.02973	1.08065	1.17347	0.850347	1.13275	1.06668	0.687325	0.75648	1.02638	0.930096	1.24355
179	Smar_temp_001409:	1457	0	195	455	301	506	61	55	0	0	210	53	73	90	0	25	0	148	112	121	56	0	182	62	51	63	0	0	94	0	0	1.36528	1.28088	0.776613	0.837498	0.936611	0.957468	0.980972	1.3901	0.899229	1.01813	0.957922	0.782619	0.765743	1.07142	0.930283	1.19503
180	Smar_temp_005235:	9565	0	1445	3245	1708	3167	297	304	0	0	1339	359	525	605	0	231	0	973	581	781	310	0	1308	551	438	466	0	0	496	0	0	1.17816	1.18813	0.906028	0.893463	0.905597	1.04409	0.973791	1.20141	0.877063	1.12397	1.05818	0.750349	0.726898	1.02737	0.973991	1.27694
181	Smar_temp_000523:	630	0	84	293	120	133	17	15	0	0	42	14	59	71	0	16	0	60	29	48	15	0	134	39	39	14	0	0	17	0	0	0.9375	0.983354	1.05717	0.998294	0.970002	1.27218	0.74375	0.9375	0.671053	0.998294	1.42857	0.789474	0.776001	1.14474	0.789474	1.49584
182	Smar_temp_008720:	32615	0	5036	10264	6076	11239	1174	891	0	0	4838	1491	1768	1951	0	847	0	3030	2243	2525	1071	0	3980	1807	1485	1633	0	0	1880	0	0	0.949711	1.23216	0.924624	0.937004	0.856674	1.02033	1.03717	1.14157	0.897904	1.14018	1.08925	0.859175	0.713895	1.07128	0.941001	1.24919
183	Smar_temp_010637:	29390	0	5326	9644	5290	9130	963	1225	0	0	3454	1351	1366	1741	0	973	0	2887	1735	2243	1147	0	3883	1777	1508	1698	0	0	1438	0	0	1.27785	1.22702	0.786932	0.862864	0.963648	1.00296	1.01138	1.19648	0.875048	1.01678	1.00812	0.81655	0.748688	1.05578	1.02628	1.21781
184	Smar_temp_009878:	1483	0	238	486	277	482	51	45	0	0	195	61	80	103	0	37	0	148	101	108	45	0	179	95	78	78	0	0	78	0	0	1.01227	1.12388	0.881282	1.00005	0.936957	1.13465	0.985716	1.01227	0.866381	1.21801	0.968699	0.788582	0.683725	1.12185	1.00835	1.24475
185	Smar_temp_009939:	18525	40	3083	6155	2899	6348	521	455	0	1	2851	759	852	855	38	591	2	1813	1071	1463	600	0	2558	1278	932	960	0	0	923	1	0	0.943079	1.25084	0.884548	0.909856	0.859589	0.887663	1.14842	1.24362	0.929126	1.24763	1.15186	0.718438	0.693645	1.07811	0.908697	1.31063
186	Smar_temp_012549:	456	0	73	140	98	145	15	14	0	0	49	26	22	39	0	10	0	44	47	27	18	0	50	23	23	22	0	0	26	0	0	0.892368	1.16327	0.731195	1.02622	0.988374	1.29621	0.712203	1.14733	0.834342	1.02622	0.855695	1.12008	0.606502	1.50823	0.947756	1.06273
187	Smar_temp_004684:	8977	0	1469	2875	1658	2975	335	288	0	0	1267	377	446	537	0	260	0	868	589	655	324	0	1140	543	421	464	0	0	462	0	0	1.06149	1.23811	0.839931	0.894857	0.911016	1.01131	1.09397	1.19418	0.840817	1.15417	1.08159	0.774397	0.68746	1.07195	0.953104	1.28509
188	Smar_temp_011825:	2232	0	304	728	358	842	60	45	0	0	371	105	97	119	0	41	0	246	156	208	58	0	287	113	98	107	0	0	120	0	0	0.92289	1.20869	0.830714	0.98836	0.895748	1.01912	1.04491	1.1895	0.888547	1.13964	0.990218	0.915583	0.75738	1.15511	0.933023	1.168
189	Smar_temp_007725:	4393	0	735	1616	642	1400	79	164	0	0	493	206	172	251	0	127	0	506	227	420	117	0	706	238	231	260	0	0	195	0	0	1.5268	1.18764	0.728305	0.854367	0.982522	1.06282	0.842012	1.08924	0.953087	0.880257	1.03274	0.879454	0.815532	1.10949	1.10999	1.10497
190	Smar_temp_003655:	318	0	82	76	97	63	24	26	0	0	14	16	23	26	0	21	0	16	24	12	30	0	18	19	18	13	0	0	17	0	0	1.03948	0.990997	0.992132	0.918485	1.06266	1.12154	0.811138	1.1994	0.884634	0.969512	0.993159	0.984901	0.796992	1.2489	0.800232	1.12169
191	Smar_temp_010440:	824	0	143	276	150	255	39	26	0	0	98	36	35	38	0	27	0	74	50	59	26	0	124	54	43	47	0	0	47	0	0	0.998788	1.34131	0.696618	0.89774	0.866382	0.756329	1.42827	0.998788	1.0125	1.12739	1.08797	0.813492	0.690764	1.07712	1.06206	1.24186
192	Smar_temp_008366:	13203	20	2114	4254	2479	4336	457	563	0	1	1878	484	641	844	19	359	1	1281	818	985	486	0	1718	707	614	654	0	0	692	0	0	1.4184	1.25343	0.802521	0.901444	0.916927	1.05667	0.981829	1.22441	0.849988	1.03798	1.06061	0.697146	0.705054	1.00475	0.942011	1.31883
193	Smar_temp_006417:	2204	0	354	631	463	756	113	77	0	0	276	122	119	131	0	59	0	198	154	197	58	0	207	96	107	129	0	0	160	0	0	1.03542	1.14584	0.897735	1.05575	0.914799	0.988263	1.16179	0.779929	1.00746	0.947219	1.03766	1.00472	0.910179	0.969682	1.06237	1.06433
194	Smar_temp_004850:	10017	1	1994	3449	1752	2821	303	493	0	0	1123	419	442	556	0	394	0	814	513	636	428	0	1569	688	624	548	1	1	464	0	0	1.4136	1.32122	0.732711	0.908874	0.838042	0.921691	0.988808	1.22722	0.940413	1.00209	0.992621	0.746145	0.654785	1.03972	0.975866	1.41355
195	Smar_temp_004857:	1000	0	162	341	200	297	38	47	0	0	121	36	50	91	0	30	0	101	65	66	32	0	134	49	55	45	0	0	39	0	0	1.45062	1.15238	0.733138	0.995619	0.997265	1.33431	0.95	0.987654	0.656566	0.887006	1.14312	0.748223	0.651678	1.09428	0.935279	1.37174
196	Smar_temp_000454:	4786	0	870	1522	1143	1251	285	142	0	0	388	201	380	330	0	195	0	361	336	339	227	0	520	332	260	188	0	0	301	0	0	0.683432	1.07435	1.04543	0.93975	0.907419	0.907874	1.04406	1.09253	1.00748	1.19999	1.23302	0.883878	0.852119	1.12463	0.826712	1.18656
197	Smar_temp_004449:	8267	0	1462	2690	1359	2756	240	218	0	0	1047	403	387	391	0	257	0	869	514	692	291	0	1022	584	411	503	0	0	437	0	0	0.907063	1.1676	0.875159	0.863953	0.969028	0.884205	1.07429	1.2108	0.964563	1.22761	0.994	0.826849	0.771654	1.13452	1.03202	1.13956
198	Smar_temp_000018:	8199	0	1246	2654	1500	2799	280	223	0	0	1184	339	434	467	0	200	0	836	563	677	314	0	1026	484	357	375	0	0	439	0	0	0.978265	1.19428	0.893837	0.885136	0.922706	0.961802	1.02032	1.37747	0.857297	1.20002	1.05622	0.796966	0.747215	1.09945	0.881599	1.2391
199	Smar_temp_012949:	702	0	137	227	167	171	31	47	0	0	62	27	37	77	0	22	0	54	52	21	31	0	87	41	48	36	0	0	28	0	0	1.44211	1.18524	0.685167	1.08351	0.976582	1.42589	0.780308	0.951178	0.688308	0.925496	0.822846	0.809066	0.379782	1.27829	1.07876	1.48846
200	Smar_temp_012075:	13403	0	2242	4292	2284	4585	426	286	0	0	1875	741	636	696	0	348	0	1282	936	1037	475	0	1691	867	682	737	0	0	687	0	0	0.748577	1.23034	0.869568	0.949929	0.873154	0.951602	1.09451	1.24327	0.879272	1.20761	0.927919	0.966152	0.706288	1.19796	0.960936	1.19543
201	Smar_temp_009297:	2708	0	455	872	417	964	77	50	0	0	438	143	129	141	0	86	0	248	161	203	64	0	351	176	144	161	0	0	135	0	0	0.713627	1.25004	0.960696	0.982841	0.798926	1.05006	1.19913	0.913442	0.90943	1.20125	1.12493	0.882869	0.65396	1.08458	0.993999	1.27635
202	Smar_temp_007388:	997	0	187	305	205	300	33	71	0	0	123	30	41	59	0	26	0	83	60	71	49	0	114	60	67	45	0	0	64	0	0	1.84654	1.2218	0.65377	1.17119	0.904383	0.940792	0.782891	1.27437	1.03753	1.04883	0.741285	0.533155	0.773628	0.972683	0.799733	1.36257
203	Smar_temp_013182:	6440	20	1031	2053	1167	2169	209	140	0	0	923	309	343	354	19	178	0	570	474	474	236	0	821	404	318	298	1	1	367	0	0	0.749349	1.25444	0.921977	0.967532	0.824351	0.951545	0.988304	1.26319	0.93373	1.22919	1.07842	0.889869	0.685513	1.20596	0.858191	1.26348
204	Smar_temp_006336:	1900	0	315	608	335	642	63	87	0	0	290	62	70	124	0	53	0	202	115	130	60	0	242	112	94	107	0	0	88	0	0	1.56645	1.24383	0.652985	0.93254	0.983255	1.15672	1.06661	1.08031	0.777421	1.11111	1.01487	0.582505	0.632788	1.01595	1.00529	1.33685
205	Smar_temp_010996:	1572	0	209	553	277	533	47	45	0	0	220	54	75	106	0	34	0	172	110	135	37	0	235	76	70	68	0	0	87	0	0	1.22191	1.20801	0.769678	0.952093	0.917336	1.08781	0.962921	1.00468	0.926328	1.0337	1.2236	0.762031	0.720002	1.17122	0.959595	1.21736
206	Smar_temp_013223:	5015	0	733	1626	925	1731	179	187	0	0	801	140	229	297	0	119	0	497	330	376	156	0	666	287	233	224	0	0	293	0	0	1.38314	1.26329	0.763562	0.980398	0.885543	0.990296	1.04916	1.15385	0.917698	1.20761	1.11073	0.553347	0.669948	1.03358	0.885356	1.34063
207	Smar_temp_010952:	12132	0	1870	4152	1914	4196	363	232	0	0	1716	576	567	569	0	305	0	1260	752	1163	337	0	1662	757	663	565	0	0	644	0	0	0.786388	1.16963	0.865598	1.03597	0.877425	0.868651	1.20214	1.1423	0.972839	1.18285	1.05815	0.89059	0.809877	1.13599	0.873582	1.18244
208	Smar_temp_010141:	7475	411	1123	2339	1043	2559	157	299	0	2	1355	231	211	364	409	210	2	662	376	424	212	0	1167	383	299	402	0	0	309	0	0	1.90818	1.59449	0.646516	0.850888	0.826739	1.11532	1.0788	1.35295	0.865396	1.08993	1.24472	0.60086	0.529513	1.05304	1.04565	1.54671
209	Smar_temp_001861:	7173	0	1142	2333	1308	2390	255	229	0	0	1043	317	374	441	0	197	0	655	450	535	237	0	959	398	345	362	0	0	375	0	0	1.09967	1.26383	0.879124	0.928836	0.842616	1.03661	1.06912	1.13809	0.860452	1.07153	1.08351	0.833098	0.688243	1.03254	0.951361	1.30975
210	Smar_temp_012396:	2923	0	500	988	465	970	79	118	0	0	395	133	103	155	0	98	0	303	165	239	92	0	443	151	139	171	0	0	138	0	0	1.4835	1.32653	0.655324	0.822464	0.924151	0.986167	1.06795	1.15663	0.8943	0.893468	1.14582	0.801565	0.72895	1.06927	1.03058	1.22711
211	Smar_temp_003609:	2076	0	456	628	368	624	56	83	0	0	216	125	103	110	0	97	0	173	126	155	93	0	212	151	140	126	0	0	109	0	0	1.02682	1.11595	0.925246	1.01492	0.916493	0.988127	0.858459	1.15053	0.98542	1.09466	0.968433	0.911985	0.821135	1.13911	0.919281	1.15163
212	Smar_temp_009655:	919	0	156	298	147	318	29	14	0	0	134	46	39	43	0	24	0	98	65	74	34	0	108	72	53	45	0	0	40	0	0	0.56105	1.11765	0.818176	1.04773	0.950382	0.902091	1.23333	1.36255	0.786377	1.42334	0.906312	0.852161	0.717635	1.27786	0.833636	1.21777
213	Smar_temp_004571:	3272	0	435	957	666	1214	130	89	0	0	537	109	168	253	0	87	0	368	279	245	82	0	308	150	113	153	0	0	200	0	0	1.00517	1.10037	0.862455	0.888159	1.03641	1.29882	0.958977	0.926112	0.809376	1.17897	1.50437	0.675355	0.689999	1.12908	0.947975	1.1922
214	Smar_temp_006545:	1268	0	220	416	274	358	44	59	0	0	124	54	86	98	0	32	0	90	85	69	42	0	174	75	65	80	0	0	90	0	0	1.24107	1.27492	0.956696	0.900568	0.766276	1.09019	0.74314	0.883477	1.1634	1.03912	0.838347	0.869375	0.587479	1.09876	1.28796	1.2268
215	Smar_temp_003057:	1198	0	187	386	230	395	54	49	0	0	175	30	59	80	0	30	0	122	68	98	28	0	129	78	75	54	0	0	68	0	0	1.36485	1.03722	0.796148	1.24477	0.958589	1.07952	1.22291	0.779912	0.896687	1.29456	1.02777	0.486563	0.770014	0.896687	0.875814	1.34369
216	Smar_temp_011377:	795	0	124	275	156	240	26	15	0	0	90	32	42	50	0	25	0	69	73	48	30	0	124	52	40	29	0	0	49	0	0	0.61647	1.30354	0.778322	0.932551	0.831136	0.926573	0.849359	1.23294	1.04046	1.21232	1.2926	0.854839	0.578182	1.55008	0.774698	1.24219
217	Smar_temp_002928:	3011	20	356	1009	518	1108	97	96	0	1	548	54	125	185	19	52	1	330	200	220	61	0	450	154	103	139	0	0	175	0	0	1.56748	1.33089	0.720112	0.86339	0.888779	1.06577	1.08849	0.996003	0.918077	1.29089	1.23542	0.412206	0.592519	1.04923	1.06105	1.34404
218	Smar_temp_008305:	9194	0	1404	3047	1739	3004	307	321	0	0	1244	375	473	618	0	230	0	881	638	721	310	0	1230	478	462	401	0	0	504	0	0	1.20877	1.21805	0.820717	0.992903	0.884928	1.07231	0.933348	1.16735	0.887024	1.02729	1.07275	0.817464	0.724215	1.12286	0.874142	1.26743
219	Smar_temp_009313:	13957	445	2056	4109	2450	4897	461	589	0	0	2515	393	505	909	444	365	1	1300	895	750	391	0	1739	709	564	736	0	0	689	1	0	1.63199	1.43754	0.700134	0.931777	0.901715	1.26024	1.07192	1.08338	0.801521	1.17133	1.20514	0.544793	0.52022	1.04116	1.02027	1.46376
220	Smar_temp_001256:	12346	20	1961	3969	2315	4081	492	338	0	0	1688	549	682	708	19	340	1	1143	803	948	413	0	1577	734	567	641	0	0	701	1	0	0.919209	1.23594	0.916386	0.899395	0.871214	0.951322	1.13342	1.12318	0.916066	1.1643	1.09157	0.846943	0.722582	1.04936	0.988872	1.25131
221	Smar_temp_004543:	3640	0	638	1202	515	1285	94	111	0	0	575	173	137	162	0	105	0	384	172	327	106	0	464	249	216	211	0	0	153	0	0	1.22969	1.16899	0.805583	1.02525	0.904951	0.952587	1.29007	1.1743	0.841555	1.18189	0.938965	0.76811	0.770622	0.946062	0.936828	1.26754
222	Smar_temp_004501:	13961	52	2733	3755	2857	4564	623	724	0	14	2013	754	646	841	38	559	14	1069	864	799	679	0	1418	696	621	874	0	0	714	0	0	1.29451	1.40402	0.840676	0.844809	0.870841	1.09444	1.06558	1.21405	0.764467	0.946839	1.04484	0.843923	0.65089	0.92507	0.978234	1.34918
223	Smar_temp_003575:	1606	0	247	467	258	634	39	34	0	0	287	81	69	63	0	34	0	165	116	135	55	0	170	98	62	96	0	0	101	0	0	0.856856	1.25187	0.919725	0.863224	0.895001	0.839749	0.940959	1.38609	0.991649	1.36445	0.895015	0.8307	0.732273	1.13892	0.984534	1.1467
224	Smar_temp_012662:	3904	0	497	1373	675	1359	138	114	0	0	657	129	194	239	0	93	0	359	229	342	84	0	632	160	188	131	0	0	214	0	0	1.32664	1.30884	0.817217	1.07558	0.751129	1.00678	1.18245	0.977527	0.910752	0.915383	1.46987	0.745631	0.71556	0.97459	0.757191	1.38879
225	Smar_temp_002401:	2368	0	413	781	544	630	125	77	0	0	208	100	180	190	0	72	0	178	162	156	85	0	270	164	152	104	0	0	144	0	0	0.811565	1.0482	1.00324	1.1159	0.856663	1.05897	1.00022	0.895884	0.994958	1.20399	0.999572	0.910104	0.750783	1.11933	0.946508	1.24098
226	Smar_temp_006270:	18020	0	3046	5911	3218	5845	561	558	0	0	2375	786	963	1138	0	550	0	1750	1136	1372	585	0	2248	1152	949	962	0	0	934	0	0	1.02582	1.15939	0.912292	0.949796	0.912741	1.07808	0.976215	1.07546	0.894811	1.15297	1.06821	0.795542	0.715589	1.08833	0.973678	1.25271
227	Smar_temp_009542:	1750	0	306	559	298	587	57	51	0	0	227	82	74	102	0	57	0	201	116	135	63	0	206	116	77	109	0	0	76	0	0	0.978747	1.15367	0.777395	0.787763	1.07197	1.07154	1.12326	1.20904	0.760322	1.18676	1.0653	0.7989	0.719982	1.16049	1.06195	1.15289
228	Smar_temp_007291:	1626	0	224	626	280	496	62	10	0	0	168	63	101	92	0	45	0	182	107	167	43	0	260	106	82	54	0	0	83	0	0	0.259247	1.07881	0.936935	0.95085	0.953094	0.853446	1.28587	1.11476	0.97176	1.22915	1.45827	0.922001	0.874543	1.25275	0.790287	1.11037
229	Smar_temp_000187:	13237	0	2347	4377	2340	4173	441	436	0	0	1609	571	645	711	0	443	0	1274	818	1062	468	0	1706	897	752	684	0	0	719	0	0	1.05087	1.17873	0.833598	0.968987	0.923281	0.918897	1.0661	1.12799	0.974662	1.15583	1.06455	0.771728	0.769643	1.10886	0.924452	1.22306
230	Smar_temp_012305:	7046	20	969	2446	1149	2462	209	182	0	0	1171	277	344	426	19	159	1	699	413	566	199	0	1102	351	300	311	0	0	315	1	0	1.15178	1.29781	0.862431	0.891833	0.817853	1.06801	1.11545	1.25937	0.784594	1.04344	1.19314	0.818108	0.662239	1.02869	0.918525	1.3612
231	Smar_temp_000973:	497	0	124	143	86	144	18	19	0	0	47	31	19	28	0	36	0	48	30	34	22	0	42	38	33	33	0	0	18	0	0	0.885503	1.02078	0.767848	0.924938	1.15851	1.13157	1.20957	1.02532	0.722384	1.06508	1.16363	0.862847	0.82061	1.20397	0.918515	1.12649
232	Smar_temp_003393:	1332	0	223	458	230	421	46	46	0	0	170	43	65	83	0	40	0	151	73	110	44	0	171	94	70	68	0	0	57	0	0	1.19462	1.08585	0.82191	0.912918	1.04312	1.04952	1.15826	1.14268	0.784096	1.22592	1.07141	0.610079	0.759888	1.00419	0.964775	1.27758
233	Smar_temp_009559:	32674	0	5371	10446	5606	11251	1049	802	0	0	4622	1596	1581	1694	0	932	0	3233	2174	2812	1063	0	3898	2041	1734	1642	0	0	1800	0	0	0.870299	1.1672	0.882127	1.00983	0.898808	0.945176	1.09062	1.15353	0.932461	1.18861	1.05562	0.862957	0.781765	1.12621	0.887829	1.19303
234	Smar_temp_003827:	1483	0	260	507	335	381	79	28	0	0	114	52	121	118	0	45	0	135	107	90	57	0	163	135	88	70	0	0	80	0	0	0.476739	0.9404	1.05651	0.990017	1.03643	1.03032	1.04395	0.970505	0.929526	1.51878	0.987204	0.778478	0.690957	1.24324	1.04795	1.16465
235	Smar_temp_002792:	1789	0	227	614	251	697	42	34	0	0	359	59	70	113	0	48	0	206	105	141	23	0	273	86	64	92	0	0	73	0	0	1.06755	1.2955	0.81258	0.821478	0.861145	1.31174	1.19265	0.722169	0.746495	1.10386	1.66648	0.66712	0.589425	1.07373	1.04025	1.32202
236	Smar_temp_007937:	4491	0	662	1450	763	1616	154	106	0	0	776	183	199	232	0	98	0	445	303	342	165	0	601	275	205	194	0	0	212	0	0	0.942468	1.28375	0.8078	0.959116	0.852891	0.941756	1.188	1.46705	0.77217	1.28662	1.00428	0.768236	0.655481	1.10362	0.814414	1.33451
237	Smar_temp_004226:	545	0	76	183	108	178	24	12	0	0	69	19	34	36	0	8	0	58	38	44	16	0	65	37	25	27	0	0	32	0	0	0.796784	1.05781	0.937563	0.979652	0.970406	0.992714	1.1214	1.06238	0.907199	1.44988	0.754848	0.765449	0.73617	1.0773	1.08774	1.18688
238	Smar_temp_004985:	465	0	62	175	87	141	20	11	0	0	52	16	24	26	0	6	0	49	32	42	17	0	77	29	24	15	0	0	24	0	0	0.948276	1.16914	0.733005	1.02857	0.923404	0.794089	1.2287	1.46552	0.909758	1.24286	0.725806	0.851064	0.791489	1.21301	0.797872	1.21624
239	Smar_temp_000177:	1213	0	235	347	287	344	62	52	0	0	109	52	72	74	0	43	0	97	101	72	65	0	112	88	65	62	0	0	86	0	0	0.935221	1.12829	0.876964	0.966889	0.9857	0.901324	0.913038	1.16903	1.05662	1.30902	0.944482	0.780257	0.731653	1.24091	0.930307	1.1173
240	Smar_temp_012832:	5127	0	834	1554	1017	1722	224	190	0	0	689	208	246	268	0	122	0	494	357	396	194	0	575	314	238	280	0	0	331	0	0	1.1485	1.22076	0.798043	0.941506	0.946468	0.869413	1.11037	1.17268	0.96903	1.24216	0.899272	0.742553	0.758707	1.04515	0.999591	1.19129
241	Smar_temp_005878:	4113	0	612	1275	707	1519	118	123	0	0	695	176	206	212	0	93	0	399	260	360	128	0	483	220	186	204	0	0	249	0	0	1.16921	1.22204	0.939932	0.980415	0.847352	0.967308	0.970961	1.21674	0.953632	1.15963	1.02127	0.778686	0.764528	0.99576	0.902567	1.23888
242	Smar_temp_012574:	4727	20	697	1640	925	1445	169	145	1	1	552	173	299	344	19	105	0	459	312	366	153	0	657	273	224	215	0	0	259	0	0	1.06311	1.15468	0.93169	0.926311	0.91556	1.07191	0.93366	1.12177	0.915958	1.12894	1.02167	0.811953	0.730054	1.10339	1.00907	1.24965
243	Smar_temp_010298:	4272	0	782	1617	825	1048	135	121	0	0	344	172	317	327	0	124	0	361	252	275	192	0	650	365	288	177	0	0	171	0	0	0.801228	1.062	1.01514	0.972987	0.910054	1.04716	0.847339	1.27137	0.844913	1.23313	0.866242	0.896585	0.693254	1.24514	0.922649	1.33803
244	Smar_temp_004288:	390	0	83	92	141	74	39	45	0	0	15	10	34	41	0	11	0	21	23	14	32	0	19	17	18	22	0	0	28	0	0	1.49962	0.875473	1.0222	0.919329	1.203	1.23265	0.765052	1.06639	1.04658	0.868256	0.622732	0.634972	0.801998	0.859689	1.39694	1.0683
245	Smar_temp_009191:	41251	0	7251	12954	7692	13354	1573	1556	0	0	5433	1801	1983	2511	0	1272	0	3962	2579	2999	1450	0	4823	2621	2186	2343	0	0	2158	0	0	1.15082	1.18562	0.820945	0.960026	0.944787	1.03953	1.09669	1.07242	0.866633	1.15106	0.997989	0.767254	0.715148	1.0357	0.998154	1.25676
246	Smar_temp_006863:	14116	20	2358	4885	2275	4578	376	291	1	0	1770	662	683	678	19	413	0	1425	924	1192	500	1	2024	991	752	692	0	0	721	0	0	0.765737	1.19727	0.867534	0.921555	0.899469	0.861183	1.0255	1.3157	0.977214	1.21444	1.04851	0.865665	0.752398	1.25235	0.904895	1.19216
247	Smar_temp_008522:	3114	0	470	1064	516	1064	95	75	0	0	442	149	157	194	0	63	0	340	189	288	94	0	400	182	167	145	0	0	133	0	0	0.963013	1.10026	0.890486	1.03991	0.935221	1.10035	1.11107	1.20698	0.75436	1.13331	0.888103	0.927824	0.792187	1.07199	0.902916	1.21579
248	Smar_temp_007523:	2216	0	404	594	487	731	99	123	0	0	346	93	117	163	0	76	0	166	148	102	99	0	216	112	94	135	0	0	126	0	0	1.38537	1.3566	0.896273	0.86802	0.847177	1.24865	0.925011	1.11505	0.784321	1.03424	1.03186	0.697837	0.520554	0.921266	1.01299	1.43487
249	Smar_temp_010390:	2812	0	454	877	437	1044	88	82	0	0	483	123	107	125	0	79	0	292	160	241	78	0	340	170	138	159	0	0	146	0	0	1.16223	1.24307	0.785088	0.974628	0.896805	0.917158	1.29579	1.10554	0.899883	1.20063	1.07778	0.729733	0.740171	0.986174	0.943314	1.24612
250	Smar_temp_004527:	8113	0	1390	2919	1201	2603	177	187	0	0	1027	385	378	418	0	246	0	822	459	688	237	0	1240	572	478	429	0	0	369	0	0	0.908794	1.18069	0.874775	0.955786	0.877698	0.967343	0.995563	1.15179	0.957614	1.14374	1.03297	0.863283	0.734618	1.19118	0.961944	1.22971
251	Smar_temp_012508:	4442	0	722	1463	741	1516	125	114	0	0	601	199	193	228	0	137	0	442	309	399	114	0	563	272	264	207	0	0	274	0	0	0.946516	1.16842	0.790812	1.1102	0.885232	0.934224	1.01124	0.946516	1.08346	1.14384	1.16741	0.807598	0.799112	1.22185	0.840064	1.16159
252	Smar_temp_006082:	2777	0	402	990	412	973	73	52	0	0	435	112	129	125	0	83	0	287	158	257	75	0	453	155	121	123	0	0	138	0	0	0.871878	1.28352	0.87828	0.844306	0.827389	0.851047	1.19427	1.25752	0.955971	1.08155	1.42627	0.795161	0.740902	1.09452	0.873257	1.27597
253	Smar_temp_011046:	1442	0	203	515	232	492	44	34	0	0	212	60	71	79	0	27	0	148	83	131	37	0	222	82	74	65	0	0	72	0	0	1.04102	1.20699	0.856897	1.02069	0.842276	0.953448	1.1788	1.13288	0.909588	1.13103	0.944794	0.866274	0.745528	1.04855	0.938464	1.26291
254	Smar_temp_000292:	611	0	126	164	134	187	31	36	0	0	66	24	22	35	0	27	0	58	45	37	29	0	52	39	31	39	0	0	39	0	0	1.30277	1.18129	0.611667	0.916618	1.15554	0.973107	1.05486	1.04946	0.950954	1.15316	1.03912	0.622358	0.737153	1.09725	1.01133	1.15319
255	Smar_temp_002739:	3308	0	561	1121	588	1038	107	114	0	0	430	134	162	211	0	95	0	303	205	222	99	0	470	218	185	181	0	0	171	0	0	1.14322	1.23723	0.813013	0.973125	0.861401	1.05892	1.02375	0.992797	0.926802	1.14671	0.998535	0.76122	0.631125	1.11108	1.02821	1.3202
256	Smar_temp_011620:	3464	20	600	985	638	1221	141	168	0	1	568	135	129	164	19	96	1	306	200	234	122	0	385	201	164	218	0	0	211	0	0	1.52025	1.37457	0.711067	0.961245	0.881348	0.903992	1.19993	1.10399	0.938262	1.17811	0.923733	0.638329	0.673972	0.889348	1.03078	1.31976
257	Smar_temp_008508:	1042	0	208	334	152	348	24	46	0	0	150	45	39	50	0	50	0	113	43	99	38	0	117	67	64	56	0	0	40	0	0	1.51607	1.09285	0.800465	0.959926	1.01303	1.02624	1.08241	1.2524	0.787961	1.00492	1.20423	0.647795	0.887518	0.847058	0.806145	1.29063
258	Smar_temp_011636:	9639	2037	1600	2056	1475	2471	273	441	0	2	1164	348	377	463	2035	356	1	589	384	447	370	0	690	455	399	475	0	1	368	0	0	1.80119	1.57338	1.19828	1.16913	1.11751	1.47163	1.20951	1.5112	0.973229	1.33322	1.34042	0.848435	0.848093	1.01554	1.15806	1.83755
259	Smar_temp_010981:	33285	20	5078	11141	5470	11576	971	872	0	0	4845	1462	1582	1716	19	824	1	3453	2044	3074	967	0	4431	1919	1675	1612	1	0	1816	0	0	1.04492	1.18823	0.864059	0.985477	0.891174	0.937248	1.08017	1.15876	0.954594	1.12903	1.06363	0.827837	0.793359	1.07444	0.912772	1.20344
260	Smar_temp_010261:	1797	0	318	596	349	534	70	55	0	0	195	76	92	128	0	66	0	171	131	124	59	0	223	121	109	84	0	0	92	0	0	0.89055	1.12813	0.794812	1.03348	0.96551	1.10582	1.03275	0.955317	0.887093	1.14726	1.17284	0.804254	0.700136	1.26314	0.888912	1.22885
261	Smar_temp_010883:	4050	0	738	1109	845	1358	146	197	0	0	509	193	182	272	0	144	0	373	320	266	144	0	368	203	186	263	0	0	283	0	0	1.27941	1.21182	0.786571	0.920407	1.00307	1.17554	0.828122	0.9352	0.998815	1.00453	1.07079	0.779931	0.715328	1.1294	1.06281	1.11782
262	Smar_temp_011916:	13146	0	2518	4514	2123	3991	381	511	0	0	1585	514	599	720	0	548	0	1267	632	1013	398	0	1837	944	811	761	0	0	624	0	0	1.25663	1.18517	0.821692	0.937988	0.924543	0.987676	1.11127	0.978748	0.968159	1.09181	1.13622	0.672387	0.739196	0.980571	0.995499	1.30816
263	Smar_temp_012096:	964	0	126	293	194	351	46	30	0	0	157	30	46	48	0	20	0	87	72	74	23	0	125	46	34	48	0	0	77	0	0	1.18311	1.40363	0.780127	0.887805	0.815495	0.814046	1.17823	0.907053	1.09008	1.20115	1.21441	0.653914	0.69364	1.0193	1.04626	1.22846
264	Smar_temp_012559:	813	0	151	255	201	206	35	57	0	0	70	19	42	77	0	33	0	64	67	23	36	0	112	42	36	46	0	0	53	0	0	1.52684	1.40032	0.666198	0.760109	0.99052	1.22136	0.704314	0.964317	1.04065	0.886794	1.17666	0.496592	0.355968	1.31553	1.20228	1.34108
265	Smar_temp_006524:	5134	0	1036	1468	1147	1483	258	133	0	0	485	251	345	284	0	254	0	389	411	326	246	0	459	398	275	261	0	0	358	0	0	0.574625	1.09349	1.05193	0.928331	0.917357	0.865934	1.00681	1.06284	1.08052	1.34355	1.21498	0.838743	0.768787	1.24049	0.872159	1.13218
266	Smar_temp_002728:	1121	0	180	302	203	436	27	44	0	0	209	53	52	65	0	26	0	104	80	89	41	0	91	56	55	58	0	0	70	0	0	1.34986	1.11849	0.950837	1.1342	0.885412	1.18855	0.734475	1.25783	0.886587	1.15482	0.899568	0.757046	0.757709	1.01324	0.828466	1.23248
267	Smar_temp_006594:	1088	0	120	183	319	466	90	23	0	0	232	37	43	38	0	19	0	47	163	38	41	0	65	41	28	32	0	0	150	0	0	0.65371	2.11174	0.801412	1.38725	0.599639	0.708224	0.962255	1.16531	1.09785	2.03133	1.43556	0.719886	0.484814	1.193	0.622604	1.16237
268	Smar_temp_010622:	17603	0	2979	6045	2722	5857	476	364	0	0	2391	865	845	957	0	582	0	1820	1037	1469	509	0	2451	1168	929	959	0	0	780	0	0	0.790186	1.18069	0.90398	0.908104	0.904871	1.0238	1.13088	1.10496	0.861228	1.14173	1.15443	0.872684	0.73036	1.14499	0.967519	1.22692
269	Smar_temp_000325:	13675	0	2625	4194	2686	4170	534	337	0	0	1407	752	830	732	0	505	0	1197	985	1037	605	0	1393	1031	774	741	0	0	814	0	0	0.653615	1.08298	1.00756	0.961414	0.935959	0.888595	1.01218	1.1734	0.993824	1.28064	1.00221	0.939463	0.810852	1.2026	0.925721	1.10649
270	Smar_temp_001055:	1136	0	187	306	259	384	48	41	0	0	153	36	62	68	0	39	0	95	108	80	43	0	86	71	62	43	0	0	100	0	0	0.961658	1.04336	0.888687	1.23086	0.918437	0.974689	0.812868	1.00857	1.14221	1.40953	1.26695	0.569519	0.77342	1.23359	0.680258	1.17871
271	Smar_temp_001329:	2255	0	386	783	345	741	66	66	0	0	316	96	94	116	0	76	0	244	119	186	77	0	332	148	113	120	0	0	85	0	0	1.11759	1.22113	0.784682	0.843094	0.948323	0.968331	1.25041	1.30386	0.74977	1.10423	1.15023	0.756854	0.722902	1.04968	0.946068	1.29777
272	Smar_temp_006893:	3276	0	552	1152	561	1011	94	118	0	0	390	156	160	193	0	90	0	309	188	255	118	0	516	188	167	177	0	0	156	0	0	1.24831	1.27376	0.811052	0.860337	0.869158	0.978331	0.978467	1.24831	0.901062	0.968524	0.967628	0.915753	0.717266	1.08589	1.03903	1.24999
273	Smar_temp_001335:	9062	0	1502	2758	1688	3114	375	212	0	0	1262	446	471	425	0	313	0	800	630	708	283	0	1094	531	392	514	0	0	605	0	0	0.757735	1.30333	0.916808	0.857523	0.844114	0.827268	1.19264	1.01151	1.04301	1.16159	1.25727	0.864113	0.747041	1.08611	0.995861	1.17936
274	Smar_temp_001878:	333	0	75	101	65	92	10	19	0	0	27	16	17	24	0	20	0	30	19	29	12	0	27	20	26	17	0	0	19	0	0	1.29785	0.881384	0.8623	1.14297	1.07512	1.21736	0.788166	0.819692	1.05803	0.879208	1.184	0.772174	1.03928	1.05803	0.820435	1.06226
275	Smar_temp_012797:	2425	0	497	739	418	771	62	108	0	0	321	110	120	122	0	85	0	216	128	149	110	0	275	193	128	173	0	0	124	0	0	1.26067	1.22111	0.942046	0.845125	0.91932	0.957747	0.8605	1.28402	0.933045	1.27429	0.834484	0.696135	0.634161	0.963144	1.09483	1.30951
276	Smar_temp_001265:	582	0	115	183	116	168	15	25	0	0	56	26	34	42	0	20	0	45	42	32	18	0	64	44	39	38	0	0	41	0	0	1.0907	1.11225	0.932165	1.07855	0.851874	1.1515	0.648781	0.785307	1.22445	1.21682	0.880151	0.78323	0.605777	1.25431	1.14472	1.15476
277	Smar_temp_001540:	1978	0	400	584	366	628	49	114	0	0	269	67	82	110	0	86	0	180	121	116	95	0	224	133	97	122	0	0	112	0	0	1.54025	1.29912	0.758833	0.821344	0.970792	1.01795	0.723536	1.28354	0.963837	1.12617	1.06317	0.527572	0.625622	1.04129	0.960653	1.34915
278	Smar_temp_004204:	16054	0	2695	5050	2913	5396	533	476	0	0	2291	766	804	887	0	443	0	1507	1100	1272	661	0	1881	1009	858	733	0	0	832	0	0	0.973399	1.1841	0.87742	1.01209	0.887837	0.967999	1.00839	1.35172	0.849756	1.19021	0.979196	0.845632	0.749389	1.12348	0.809201	1.26318
279	Smar_temp_002154:	1524	0	283	422	290	529	50	84	0	0	241	65	73	93	0	43	0	142	83	104	66	0	134	91	72	101	0	0	81	0	0	1.55984	1.14674	0.90907	0.918795	0.969405	1.15813	0.906064	1.22559	0.804667	1.16125	0.81824	0.661693	0.709987	0.824536	1.02817	1.31247
280	Smar_temp_001741:	5916	0	950	1841	1151	1974	220	155	0	0	776	242	358	321	0	123	0	571	418	523	225	0	567	430	344	257	0	0	385	0	0	0.838612	0.9897	0.999498	1.16361	0.92953	0.896198	0.982427	1.21734	1.00246	1.45452	0.80628	0.763436	0.851391	1.08838	0.810757	1.17814
281	Smar_temp_004600:	471	0	100	124	127	120	22	39	0	0	42	14	31	52	0	26	0	29	35	14	17	0	36	21	28	29	0	0	35	0	0	1.44638	1.10276	0.927165	1.06355	0.917944	1.55525	0.642445	0.630472	1.08169	0.797661	1.2246	0.5495	0.443145	1.08169	1.13825	1.37375
282	Smar_temp_000405:	1353	0	299	412	289	353	58	85	0	0	131	56	68	100	0	70	0	104	78	64	69	0	159	88	81	79	0	0	62	0	0	1.33091	1.26736	0.772701	0.88964	0.967518	1.13633	0.939572	1.08038	0.822275	0.966523	1.05938	0.71786	0.595396	1.03447	1.0127	1.42239
283	Smar_temp_000889:	5387	0	861	1774	903	1849	179	169	0	0	752	255	237	294	0	125	0	579	318	498	167	0	669	312	288	281	0	0	263	0	0	1.17096	1.14516	0.796992	1.01574	0.9509	0.988674	1.18256	1.1571	0.848551	1.10039	0.908345	0.862873	0.817873	1.026	0.950853	1.18493
284	Smar_temp_011923:	3589	0	582	1245	582	1180	114	75	0	0	495	166	170	198	0	103	0	355	223	300	105	0	508	238	212	162	0	0	164	0	0	0.794674	1.17625	0.842035	1.05007	0.867262	0.980723	1.2079	1.11254	0.857062	1.17885	1.09135	0.867514	0.732898	1.1654	0.84661	1.27589
285	Smar_temp_009590:	2989	0	625	897	552	915	111	106	0	0	330	170	133	164	0	120	0	265	202	198	128	0	306	229	192	185	0	0	149	0	0	0.918359	1.13674	0.802871	1.02366	0.965069	0.990007	1.08886	1.10896	0.881763	1.22092	0.918221	0.888533	0.72107	1.19541	0.966933	1.17814
286	Smar_temp_007257:	6868	20	1403	1972	1555	1918	345	178	1	0	586	352	472	363	19	349	0	469	559	427	336	0	658	523	372	346	1	0	511	0	0	0.560354	1.1621	1.05715	0.92344	0.851623	0.813017	0.979915	1.05775	1.17672	1.29828	1.2177	0.898394	0.775359	1.28725	0.88308	1.09403
287	Smar_temp_002756:	6323	0	1086	1991	1187	2059	227	364	0	0	898	198	244	407	0	190	0	624	352	432	214	0	818	333	305	377	0	0	339	0	0	1.78543	1.30477	0.652816	0.891912	0.962454	1.08892	1.0187	1.04968	0.877033	0.973792	1.01863	0.559889	0.666315	0.910665	1.06605	1.33933
288	Smar_temp_012590:	3081	0	648	878	734	821	167	93	0	0	239	143	226	178	0	167	0	209	248	180	158	0	274	245	169	154	0	0	230	0	0	0.602426	1.0951	1.08046	0.915185	0.893306	0.850983	0.955028	1.02348	1.17593	1.32675	1.22534	0.828151	0.769355	1.26796	0.891855	1.09245
289	Smar_temp_003662:	3267	0	514	1034	571	1148	100	92	0	0	502	155	173	181	0	73	0	301	206	285	100	0	374	194	185	155	0	0	190	0	0	1.02409	1.14282	0.957279	1.1372	0.828425	1.00155	1.00202	1.11314	0.946945	1.19252	0.902705	0.858175	0.784389	1.02669	0.858175	1.24443
290	Smar_temp_004345:	8076	0	1668	2323	1499	2586	298	442	0	0	970	370	286	426	0	365	0	768	473	535	297	0	871	490	398	608	0	0	478	0	0	1.42765	1.30352	0.663302	0.829534	1.03248	0.987996	1.07105	0.959301	0.99585	1.02129	1.05949	0.692745	0.719238	0.985433	1.13835	1.17142
291	Smar_temp_006850:	407	0	48	143	71	145	16	3	0	0	52	21	29	21	0	6	0	50	23	53	12	0	50	18	14	16	0	0	22	0	0	0.358275	0.995159	1.16251	0.830128	0.981432	0.84182	1.29181	1.4331	0.869743	1.06731	1.0599	1.22802	1.04032	0.909276	0.935632	1.00661
292	Smar_temp_009853:	1816	0	298	550	310	658	49	63	0	0	282	82	78	103	0	49	0	201	120	148	65	0	195	104	75	108	0	0	93	0	0	1.23845	1.17064	0.83078	0.830995	1.00861	1.09706	0.925952	1.27777	0.827964	1.15231	1.00203	0.75943	0.742658	1.06834	1.00022	1.18281
293	Smar_temp_001876:	2537	0	381	898	494	764	94	87	0	0	324	79	162	191	0	79	0	240	150	190	88	0	381	136	115	99	0	0	121	0	0	1.1727	1.19865	0.926472	0.852741	0.887487	1.09232	0.977225	1.18618	0.813365	1.00846	1.38069	0.68854	0.702594	1.0083	0.862854	1.40825
294	Smar_temp_002560:	19549	0	3415	6515	3141	6478	527	500	0	0	2491	903	878	885	0	632	0	2001	1236	1712	645	0	2537	1380	1099	1039	0	0	1083	0	0	0.911247	1.16847	0.838758	0.965644	0.926865	0.845445	1.04424	1.17551	1.0405	1.21255	1.0594	0.797959	0.793	1.1875	0.918139	1.16042
295	Smar_temp_004443:	662	0	103	190	135	234	31	17	0	0	90	33	34	39	0	18	0	71	53	57	24	0	58	35	27	34	0	0	40	0	0	0.809349	1.0636	0.877505	0.913337	1.05717	1.00655	1.12604	1.14261	0.83824	1.18396	1.1232	0.906398	0.848718	1.11067	0.933864	1.0881
296	Smar_temp_002950:	26472	365	3671	8534	5010	8892	1056	722	0	2	3902	992	1411	1724	363	622	2	2505	1821	2016	739	0	3458	1335	1160	1150	0	0	1491	0	0	1.03921	1.25692	0.873622	0.980184	0.873861	1.06742	1.11372	1.06368	0.885987	1.12806	1.22182	0.804479	0.703275	1.08208	0.932611	1.3064
297	Smar_temp_009329:	1885	0	303	654	297	631	39	87	0	0	274	59	67	114	0	44	0	208	103	141	54	0	286	113	92	113	0	0	90	0	0	1.82235	1.26044	0.650207	0.875143	0.950096	1.10632	0.833418	1.13111	0.905249	1.0749	0.903397	0.58169	0.644056	1.03601	1.11408	1.29719
298	Smar_temp_005601:	11143	0	1885	3619	1906	3733	335	219	0	0	1426	564	572	561	0	344	0	1115	779	923	382	0	1377	758	554	605	0	0	628	0	0	0.679222	1.17154	0.924031	0.904924	0.919667	0.906261	1.02755	1.18476	0.983515	1.23814	1.07879	0.893124	0.761303	1.22	0.95805	1.14026
299	Smar_temp_012273:	2021	0	349	773	360	539	69	80	0	0	193	61	107	140	0	57	0	206	104	157	71	0	324	151	136	85	0	0	79	0	0	1.28685	1.09585	0.777084	1.01883	0.99923	1.01675	1.076	1.14208	0.822815	1.1312	0.94578	0.655363	0.761549	1.0832	0.913211	1.3426
300	Smar_temp_012923:	20769	573	3456	6553	3768	6419	791	742	0	0	2695	821	866	1178	569	691	1	1806	1369	1353	702	0	2815	1202	1062	1001	0	0	1097	4	3	1.18341	1.36149	0.728421	0.973927	0.891714	0.990854	1.1571	1.11961	0.941985	1.10232	1.20156	0.768631	0.668045	1.17555	0.937149	1.35844
301	Smar_temp_013016:	5365	0	922	1702	1004	1737	198	254	0	0	811	184	255	363	0	174	0	496	297	353	197	0	675	310	275	276	0	0	246	0	0	1.47211	1.25013	0.800602	0.940182	0.900103	1.13968	1.05382	1.14175	0.756783	1.05984	1.09814	0.616392	0.640597	0.913677	0.924588	1.44209
302	Smar_temp_006116:	2337	0	463	675	432	767	91	102	0	0	299	128	100	114	0	79	0	218	139	179	106	0	229	153	128	150	0	0	121	0	0	1.19177	1.17459	0.80144	0.957159	0.984048	0.913642	1.13955	1.23851	0.853424	1.1441	0.861239	0.84235	0.808002	0.98038	0.987128	1.18779
303	Smar_temp_002745:	569	0	74	182	83	230	17	15	0	0	93	16	19	24	0	12	0	94	32	80	15	0	46	31	22	25	0	0	27	0	0	1.38961	0.790182	0.715676	0.929462	1.27774	0.904012	1.40412	1.38961	0.804767	1.3097	1.2469	0.5349	1.08743	0.953798	0.835781	1.00032
304	Smar_temp_005624:	5843	0	986	1803	1209	1845	260	139	0	0	653	280	321	363	0	188	0	551	488	401	224	0	660	379	271	303	0	0	361	0	0	0.681314	1.18628	0.860437	0.890702	0.967822	0.973017	1.03934	1.09795	0.945628	1.24567	1.1299	0.899333	0.704349	1.2783	0.973207	1.12087
305	Smar_temp_006281:	4273	0	740	1433	714	1386	114	130	0	0	521	193	211	242	0	157	0	455	259	386	141	0	544	260	223	219	0	0	217	0	0	1.05135	1.13198	0.881193	0.898586	0.978892	1.01066	0.955523	1.14031	0.936982	1.04768	1.22509	0.804073	0.830445	1.11833	0.912393	1.1589
306	Smar_temp_009538:	10454	0	1636	3584	1772	3462	311	315	0	0	1440	416	520	591	0	299	0	1040	626	857	303	0	1530	606	494	539	0	0	566	0	0	1.13592	1.2452	0.855961	0.880761	0.876235	0.972833	1.03542	1.09264	0.964513	1.08045	1.16785	0.767831	0.722052	1.06676	0.994858	1.256
307	Smar_temp_003122:	15194	0	2663	5250	2430	4851	415	325	0	0	1821	674	735	697	0	542	0	1557	955	1364	519	0	2067	1122	890	711	0	0	799	0	0	0.763094	1.13945	0.875374	0.967234	0.928903	0.830117	1.06784	1.2186	1.02987	1.21937	1.16126	0.792738	0.813759	1.23094	0.836256	1.17576
308	Smar_temp_005422:	1712	0	237	557	292	626	53	24	0	0	261	97	81	101	0	24	0	183	134	154	53	0	209	92	83	77	0	0	85	0	0	0.593723	1.15329	0.852611	1.07641	0.898515	1.06313	1.06418	1.31114	0.796096	1.19313	0.731507	1.11932	0.756127	1.25502	0.888529	1.14024
309	Smar_temp_010022:	12718	20	2024	4099	2214	4361	417	451	0	0	1932	480	502	690	19	357	0	1244	844	955	401	0	1716	736	636	630	0	0	705	1	1	1.27999	1.29891	0.703505	0.974962	0.885065	0.966969	1.08193	1.13809	0.928633	1.12826	1.10832	0.691614	0.679451	1.11173	0.907743	1.29197
310	Smar_temp_011383:	6683	20	1149	2029	1069	2416	185	223	0	1	1133	266	248	389	19	252	0	694	413	473	173	0	759	408	327	396	0	0	322	0	1	1.21333	1.23211	0.764123	0.937383	0.946132	1.19856	1.0819	0.941282	0.833207	1.16958	1.27565	0.640378	0.644842	1.06868	0.953344	1.2972
311	Smar_temp_012404:	26435	0	4951	7926	4588	8970	883	723	0	0	3406	1686	1125	1302	0	912	0	2395	1857	1941	920	0	3053	1629	1353	1766	0	0	1483	0	0	0.841398	1.28469	0.817814	0.911444	0.890509	0.946483	1.1089	1.07066	0.952587	1.09737	0.983532	1.00358	0.721703	1.19282	1.0512	1.11902
312	Smar_temp_006151:	55599	43	8756	16516	11226	19058	2417	1940	0	2	8229	2605	2847	3591	38	1434	0	4979	4022	3882	1976	0	6263	2777	2421	2925	0	0	3242	3	5	1.09733	1.27656	0.853738	0.930789	0.879482	1.07684	1.06633	1.11769	0.842515	1.06766	1.03993	0.867944	0.68571	1.04522	0.974563	1.25968
313	Smar_temp_008805:	8050	20	1373	2493	1564	2600	327	285	0	1	990	408	397	474	19	260	1	723	555	619	285	0	980	420	393	434	0	0	478	0	0	1.0684	1.26934	0.819648	0.924263	0.897922	0.978622	1.07614	1.0684	0.946267	0.987762	1.11027	0.920052	0.76876	1.0987	0.978682	1.17892
314	Smar_temp_012554:	945	0	208	284	255	198	55	46	0	0	54	39	92	88	0	53	0	57	62	38	64	0	87	70	47	44	0	0	48	0	0	0.81957	1.01933	1.2005	0.751879	0.957907	1.1483	0.799308	1.14027	0.898396	1.11982	1.15766	0.894886	0.638604	1.16043	1.00962	1.30165
315	Smar_temp_001148:	3149	0	436	1026	537	1150	109	50	0	0	499	150	158	180	0	81	0	329	220	285	76	0	405	155	133	146	0	0	172	0	0	0.672484	1.21153	0.903042	0.936247	0.878058	1.02878	1.19028	1.02218	0.877059	1.09111	1.34179	0.942062	0.760628	1.12182	0.916941	1.18817
316	Smar_temp_001438:	5989	0	1034	2069	979	1907	174	119	0	0	722	298	301	355	0	221	0	598	385	498	161	0	820	396	349	302	0	0	289	0	0	0.704041	1.14722	0.889975	0.977009	0.907704	1.04964	1.08727	0.952526	0.927083	1.10858	1.23796	0.905106	0.755914	1.23504	0.917255	1.18902
317	Smar_temp_001365:	1884	0	279	633	377	595	75	96	0	0	283	52	106	125	0	31	0	158	100	117	75	0	290	100	78	95	0	0	102	0	0	1.71952	1.36355	0.836839	0.832085	0.790346	0.986838	0.994167	1.34337	0.856688	1.06678	0.750299	0.590151	0.585256	0.83989	1.07816	1.50603
318	Smar_temp_012655:	1427	0	256	459	296	416	73	54	0	0	157	55	69	76	0	39	0	130	100	94	73	0	180	108	79	65	0	0	74	0	0	1.01692	1.21919	0.724717	0.959397	0.971541	0.798239	1.18895	1.37472	0.857572	1.31158	0.849197	0.736976	0.702499	1.15888	0.870972	1.2946
319	Smar_temp_007895:	3506	0	482	1197	611	1216	106	107	0	0	516	112	172	226	0	81	0	390	226	316	82	0	473	182	162	157	0	0	197	0	0	1.27382	1.1574	0.824527	0.984432	0.939396	1.08339	0.995486	0.976197	0.929615	1.10597	1.22237	0.669961	0.761152	1.06646	0.939141	1.22347
320	Smar_temp_006625:	4303	0	844	1500	713	1246	133	178	0	0	468	195	158	242	0	196	0	380	244	244	135	0	738	275	224	289	0	0	203	0	0	1.2728	1.41138	0.635693	0.761352	0.874874	0.973657	1.12576	0.965324	0.983241	0.934696	1.18397	0.797894	0.561761	1.18183	1.18252	1.29712
321	Smar_temp_003161:	1528	0	270	448	324	486	68	68	0	0	178	68	85	97	0	42	0	145	103	114	64	0	144	92	73	91	0	0	95	0	0	1.18775	1.0963	0.894786	0.922156	1.0176	1.02111	0.989788	1.11788	0.921862	1.16217	0.880329	0.791831	0.800044	0.999492	1.05966	1.15152
322	Smar_temp_003356:	18385	20	3295	5265	3603	6202	875	669	0	0	2804	944	879	1007	19	718	1	1439	1180	1163	706	0	2130	964	816	1054	0	0	1015	1	0	1.03602	1.41269	0.851902	0.864769	0.810204	0.975957	1.23921	1.09332	0.835091	1.02161	1.21584	0.849275	0.654807	0.970844	0.948237	1.34023
323	Smar_temp_007221:	1065	0	166	353	244	302	56	22	0	0	96	58	81	87	0	37	0	81	85	60	33	0	156	49	35	61	0	0	67	0	0	0.578461	1.33329	1.00154	0.636114	0.809195	1.07573	1.00175	0.867692	0.968339	0.890559	1.43	1.23215	0.599403	1.22849	1.29588	1.121
324	Smar_temp_008898:	3357	0	607	1124	603	1023	107	157	0	0	413	142	148	219	0	103	0	315	191	212	125	0	488	205	172	207	0	0	152	0	0	1.43994	1.2967	0.733043	0.846301	0.919644	1.08471	0.987872	1.14645	0.827184	1.00867	0.93845	0.767671	0.618935	1.03942	1.11907	1.3248
325	Smar_temp_011274:	1579	0	190	527	290	572	48	56	0	0	258	38	65	107	0	27	0	183	121	128	41	0	223	69	56	65	0	0	93	0	0	1.60479	1.26784	0.671563	0.883092	0.958576	1.1055	0.901213	1.17494	0.88526	1.0881	1.18097	0.552098	0.670479	1.15179	0.944378	1.24512
326	Smar_temp_011365:	596	0	119	109	143	225	24	23	0	0	89	47	25	39	0	18	0	48	71	19	39	0	19	31	16	46	0	0	41	0	0	0.805547	0.953118	0.955925	0.735178	1.16648	1.49124	0.699496	1.36593	0.759472	1.42441	0.757574	1.0462	0.461733	1.31518	1.02394	1.04778
327	Smar_temp_007014:	1819	0	308	589	336	586	61	82	0	0	257	68	97	121	0	43	0	173	96	128	66	0	225	114	94	105	0	0	88	0	0	1.44131	1.17974	0.891559	0.942529	0.911729	1.11215	0.982843	1.16008	0.812977	1.14307	0.824517	0.68532	0.674574	0.886884	1.05821	1.36135
328	Smar_temp_008346:	8917	20	1570	2854	1607	2866	298	283	0	1	1088	393	433	476	19	275	0	888	593	700	338	0	1059	619	472	485	0	0	495	0	1	1.00021	1.15933	0.841854	0.939306	0.968058	0.925456	1.02897	1.19459	0.958367	1.23184	0.994838	0.778817	0.763109	1.1481	0.961136	1.18112
329	Smar_temp_009284:	6372	0	1083	2000	1316	1973	270	329	0	0	863	203	319	481	0	192	0	559	398	345	217	0	815	359	307	366	0	0	348	0	0	1.47091	1.29829	0.77229	0.903141	0.902673	1.16449	0.993408	0.970177	0.854028	1.05612	1.04309	0.605364	0.557106	0.976733	1.09144	1.41264
330	Smar_temp_012199:	7447	0	1409	2303	1367	2368	276	297	0	0	941	370	348	422	0	260	0	667	446	497	280	0	902	482	385	484	0	0	389	0	0	1.14831	1.26648	0.823186	0.883562	0.910818	0.998232	1.0999	1.08258	0.894913	1.10617	0.975288	0.825829	0.678675	1.02604	1.08027	1.24971
331	Smar_temp_008232:	1154	0	295	319	222	318	56	83	0	0	120	60	40	62	0	66	0	93	43	59	60	0	112	86	73	96	0	0	44	0	0	1.46254	1.27011	0.651812	0.895192	1.05796	1.01031	1.31126	1.05726	0.719248	1.05461	0.875197	0.738088	0.671182	0.702901	1.18094	1.36941
332	Smar_temp_009092:	1458	0	210	459	312	477	66	54	0	0	201	55	78	117	0	36	0	138	114	97	46	0	180	65	62	65	0	0	83	0	0	1.20165	1.24567	0.794118	0.937815	0.918979	1.19118	0.988536	1.02363	0.813135	0.983193	1.1902	0.800539	0.645949	1.11684	0.946092	1.288
333	Smar_temp_001677:	3922	0	805	1247	697	1173	148	73	0	0	419	249	194	251	0	168	0	353	282	239	146	0	441	315	258	233	0	0	152	0	0	0.510272	1.11228	0.875407	1.00801	0.946494	1.13261	1.19482	1.02054	0.729156	1.23071	1.01678	1.03422	0.640827	1.35278	0.967764	1.19433
334	Smar_temp_003217:	2202	0	380	740	424	658	107	78	0	0	267	92	115	145	0	75	0	200	124	153	73	0	306	135	118	114	0	0	99	0	0	1.06601	1.23048	0.807082	0.924026	0.904461	1.01762	1.3106	0.997679	0.781377	1.05715	1.1437	0.810206	0.691912	0.978695	1.00395	1.35793
335	Smar_temp_007790:	3200	0	463	1061	643	1033	144	135	0	0	453	104	155	235	0	68	0	321	208	229	108	0	441	156	144	143	0	0	155	0	0	1.45108	1.2536	0.727035	0.938029	0.937215	1.10228	1.11453	1.16087	0.746742	1.0162	1.01507	0.695828	0.668605	1.00208	0.956764	1.35846
336	Smar_temp_009400:	5637	0	912	1732	1078	1915	221	185	0	0	826	240	299	331	0	168	0	542	373	441	219	0	640	319	250	275	0	0	307	0	0	1.06073	1.20263	0.902719	0.892165	0.921151	0.999331	1.07202	1.25568	0.838299	1.1384	1.13859	0.774632	0.749497	1.01852	0.8876	1.26967
337	Smar_temp_003504:	3876	0	621	1248	661	1346	120	130	0	0	588	153	167	209	0	91	0	418	244	321	146	0	471	247	192	192	0	0	186	0	0	1.22754	1.17213	0.784665	0.960238	0.964496	0.982006	1.06454	1.37862	0.810308	1.23531	0.914623	0.709477	0.740678	1.06298	0.890325	1.25797
338	Smar_temp_003679:	1643	0	239	537	297	570	68	55	0	0	269	50	60	94	0	43	0	170	114	113	54	0	238	91	68	74	0	0	81	0	0	1.27305	1.35602	0.618099	0.870511	0.912509	0.968355	1.26658	1.2499	0.786124	1.16495	1.23683	0.603024	0.60655	1.1064	0.892476	1.36032
339	Smar_temp_000779:	4813	0	894	1544	886	1489	174	177	0	0	588	219	219	261	0	178	0	433	316	340	201	0	622	320	270	245	0	0	249	0	0	1.07552	1.25577	0.770511	0.941445	0.906487	0.91828	1.06684	1.22135	0.90842	1.11579	1.07192	0.791822	0.711791	1.15285	0.885829	1.27645
340	Smar_temp_009351:	6590	0	1010	2099	1071	2410	188	175	0	0	1075	295	266	306	0	143	0	690	442	584	228	0	812	397	330	309	0	0	349	0	0	1.06614	1.21455	0.779768	1.02581	0.898887	0.897026	1.0801	1.38902	0.891055	1.23408	0.923802	0.798673	0.760797	1.1285	0.836576	1.21972
341	Smar_temp_010427:	2699	0	475	887	507	830	98	99	0	0	307	123	124	158	0	85	0	255	186	198	106	0	362	168	146	138	0	0	145	0	0	1.10952	1.24184	0.744206	0.935273	0.934849	0.948262	1.02899	1.18797	0.930004	1.0762	1.0168	0.842047	0.725883	1.19297	0.944736	1.20278
342	Smar_temp_001731:	6165	20	937	2053	1135	2020	237	180	1	1	852	224	343	328	19	147	0	577	375	534	204	0	805	385	328	258	0	0	366	0	0	1.04345	1.17747	0.907491	1.05118	0.857766	0.867805	1.1342	1.18257	0.984163	1.23386	1.03222	0.729609	0.793842	1.00836	0.840353	1.28727
343	Smar_temp_001811:	15567	0	2552	4974	2989	5052	627	593	0	0	2108	613	771	970	0	439	0	1512	998	1172	573	0	1925	906	766	774	0	0	819	0	0	1.21019	1.21122	0.807286	0.939393	0.936672	1.01565	1.0925	1.16937	0.844305	1.11108	1.04932	0.740153	0.726045	1.02884	0.934549	1.28573
344	Smar_temp_000990:	6396	0	1079	2109	1241	1967	264	206	0	0	803	262	384	452	0	233	0	576	387	457	200	0	823	377	326	320	0	0	325	0	0	0.983971	1.18346	0.938407	0.91628	0.888076	1.10458	1.0964	0.955312	0.851561	1.05962	1.28003	0.789558	0.704602	1.01401	0.964345	1.32744
345	Smar_temp_011902:	4189	0	687	1355	677	1470	129	115	0	0	639	192	192	194	0	97	0	421	241	390	136	0	487	283	254	200	0	0	218	0	0	1.03577	1.11112	0.876766	1.143	0.885392	0.885899	1.17902	1.22491	0.917616	1.27351	0.860932	0.796411	0.820197	1.01443	0.829595	1.23873
346	Smar_temp_011909:	2604	0	407	830	451	916	99	81	0	0	398	108	114	137	0	61	0	278	157	214	84	0	323	156	115	147	0	0	131	0	0	1.14909	1.22092	0.793033	0.886475	0.952165	0.953031	1.26743	1.19165	0.825734	1.20252	0.958919	0.754353	0.732962	0.98962	1.02676	1.23519
347	Smar_temp_003564:	3500	0	412	1247	544	1297	73	70	0	0	638	69	116	213	0	65	0	418	285	286	87	0	540	208	173	87	0	0	171	0	0	1.09313	1.21543	0.598495	1.17856	0.904561	1.09896	0.863362	1.3586	0.848253	1.41699	1.34025	0.451939	0.61891	1.41375	0.569836	1.32742
348	Smar_temp_002579:	14106	215	2365	4085	2592	4849	553	462	0	2	2146	743	640	804	212	453	1	1232	936	937	508	0	1637	707	575	829	1	1	725	0	1	1.06311	1.38378	0.852623	0.839554	0.877345	1.07111	1.16107	1.16896	0.813682	1.03229	1.14246	0.913922	0.667266	1.05049	1.01971	1.28745
349	Smar_temp_009970:	2446	0	440	783	380	843	47	106	0	0	357	128	82	113	0	85	0	221	145	176	83	0	372	121	107	165	0	0	137	0	0	1.55069	1.48414	0.674101	0.759671	0.818954	0.928944	0.796136	1.21422	1.04608	0.859068	1.07392	0.844085	0.652198	1.10717	1.08808	1.22877
350	Smar_temp_002146:	1186	0	182	357	285	362	80	37	0	0	126	49	80	83	0	34	0	98	88	93	34	0	119	62	60	54	0	0	88	0	0	0.846	1.10738	0.932527	1.09521	0.899361	0.967497	1.16811	0.777405	1.01161	1.13171	1.21737	0.882065	0.853475	1.01161	0.972072	1.14035
351	Smar_temp_001871:	2037	181	420	421	564	451	184	119	0	0	110	114	116	141	180	91	0	107	145	71	118	1	112	96	85	125	0	0	120	0	1	1.02332	1.2872	0.995148	0.979216	1.14793	1.20962	1.17829	1.01472	0.960985	1.10594	1.05083	1.22594	0.761712	1.16119	1.34424	1.10162
352	Smar_temp_011432:	4745	0	754	1532	794	1665	150	178	0	0	732	203	188	237	0	124	0	478	278	390	155	0	656	248	210	265	0	0	252	0	0	1.4108	1.32624	0.733356	0.862632	0.889183	0.924497	1.12898	1.2285	0.904486	1.01873	1.03494	0.767267	0.725484	0.997806	1.00161	1.25291
353	Smar_temp_002941:	3570	0	674	1131	712	1053	119	174	0	0	431	139	169	223	0	136	0	268	250	169	155	0	514	225	179	203	0	0	215	0	0	1.29443	1.43452	0.749225	0.838299	0.803363	0.988622	0.838022	1.15308	1.02376	1.05373	1.06878	0.699189	0.506599	1.19042	1.02112	1.38768
354	Smar_temp_000299:	4015	0	877	1224	865	1049	181	229	0	0	350	171	215	264	0	176	0	308	240	219	199	0	440	301	261	240	0	0	220	0	0	1.21201	1.17917	0.815317	0.976214	0.963118	1.00113	0.971252	1.05323	0.973457	1.12583	0.918754	0.746288	0.684814	1.06195	1.04742	1.27703
355	Smar_temp_002183:	1407	0	263	425	343	376	67	91	0	0	126	55	79	138	0	40	0	129	106	64	72	0	145	77	71	80	0	0	66	0	0	1.41934	1.12949	0.762497	0.893733	1.13581	1.33196	0.801273	1.12299	0.720039	0.96926	0.813659	0.782552	0.563504	1.15643	1.13826	1.25398
356	Smar_temp_005994:	6076	0	835	1906	1154	2181	249	119	0	0	934	235	346	337	0	159	0	602	440	553	158	0	693	322	265	253	0	0	410	0	0	0.750365	1.15906	0.955796	1.01171	0.879905	0.930934	1.13607	0.996283	0.989783	1.22932	1.38561	0.78405	0.808285	1.06221	0.844104	1.19304
357	Smar_temp_009724:	1902	0	233	631	325	713	51	32	0	0	300	74	86	117	0	23	0	235	156	178	53	0	231	104	78	79	0	0	104	0	0	0.80375	1.10348	0.79762	1.00907	0.993481	1.08513	0.918362	1.33121	0.853633	1.34542	0.805799	0.847221	0.752509	1.28045	0.904466	1.12241
358	Smar_temp_010752:	312	0	57	104	38	113	0	8	0	0	49	25	17	6	0	12	0	30	13	51	23	0	34	12	22	0	0	0	9	0	0	1.15235	0.980769	1.34211	1.15789	0.79646	0.473684	0	3.31302	0.653936	0.631579	1.15235	1.21099	1.35398	0.944574	0	1.19727
359	Smar_temp_001676:	487	0	88	138	90	171	16	18	0	0	81	22	25	31	0	17	0	43	31	30	17	0	45	31	25	29	0	0	25	0	0	1.10682	1.15076	0.980274	1.00255	0.887406	1.21554	0.961975	1.04533	0.791098	1.24317	1.06909	0.711988	0.61912	0.980962	0.93853	1.34903
360	Smar_temp_004732:	12772	0	2190	4676	2166	3740	419	504	0	0	1473	501	587	712	0	413	0	1201	656	940	471	0	2252	772	635	671	0	0	564	0	0	1.35702	1.31546	0.740226	0.79198	0.877114	0.897854	1.14066	1.26817	0.889217	0.962848	1.09982	0.781234	0.6865	1.03427	1.04632	1.34499
361	Smar_temp_012417:	5828	0	902	1925	1052	1949	202	281	0	0	883	171	235	367	0	157	0	590	334	428	178	0	837	293	262	304	0	0	305	0	0	1.72585	1.31639	0.676302	0.879394	0.916493	1.05618	1.06375	1.09324	0.866946	0.983445	1.12462	0.566888	0.664846	0.949376	1.0078	1.35474
362	Smar_temp_005208:	610	0	97	199	126	188	23	23	0	0	74	22	41	44	0	16	0	58	39	45	25	0	73	36	26	30	0	0	34	0	0	1.14793	1.12447	0.997448	0.821634	0.945686	1.07043	0.883724	1.24775	0.875549	1.13765	1.0373	0.735907	0.733722	1.00431	1.00351	1.27716
363	Smar_temp_003363:	2643	0	481	844	429	889	74	88	0	0	381	121	128	122	0	86	0	250	139	198	96	0	337	186	128	171	0	0	137	0	0	1.12714	1.25038	0.934345	0.833335	0.880629	0.890548	1.06271	1.22961	0.949421	1.21094	0.982439	0.747887	0.697458	0.963281	1.05693	1.27414
364	Smar_temp_004516:	2555	0	372	829	429	925	80	54	0	0	413	122	122	139	0	56	0	260	173	215	80	0	334	140	112	124	0	0	130	0	0	0.864539	1.24173	0.876474	0.927922	0.866299	0.998605	1.11062	1.2808	0.837019	1.1599	1.03393	0.90587	0.716363	1.11388	0.920721	1.23327
365	Smar_temp_009515:	420	0	100	129	95	96	14	20	0	0	27	19	21	32	0	23	0	28	40	15	28	0	44	38	35	14	0	0	21	0	0	0.884211	1.11051	0.719706	1.13953	0.949612	1.0967	0.651524	1.23789	0.967105	1.23721	0.966	0.83125	0.508721	1.84211	0.6125	1.23047
366	Smar_temp_005158:	18585	0	3317	5823	3394	6051	624	797	0	0	2463	838	891	1087	0	590	0	1763	1082	1439	696	0	2205	1092	963	1067	0	0	987	0	0	1.31572	1.20859	0.83788	0.926609	0.92991	1.02219	1.00675	1.14899	0.893184	1.05073	0.996606	0.77595	0.759013	0.979154	0.987994	1.25018
367	Smar_temp_002100:	7216	0	1445	2121	1204	2446	194	312	0	0	938	406	214	375	0	300	0	711	483	499	244	0	820	427	375	526	0	0	391	0	0	1.29407	1.31531	0.604704	0.882916	0.988938	1.05965	0.965707	1.01203	0.958055	1.00535	1.03677	0.828893	0.694065	1.18348	1.07389	1.13132
368	Smar_temp_004743:	4628	0	731	1448	735	1714	101	113	0	0	745	252	219	213	0	119	0	444	302	411	148	0	576	247	208	256	0	0	273	0	0	0.973346	1.27139	0.952317	0.909433	0.827936	0.926226	0.865247	1.27482	1.0029	1.07995	1.03064	0.93082	0.766401	1.10944	0.945595	1.17362
369	Smar_temp_005230:	9255	0	1478	3154	1436	3187	217	233	0	0	1309	405	389	428	0	249	0	973	597	868	291	0	1266	591	526	412	0	0	500	0	0	1.01602	1.17784	0.794895	1.0443	0.895871	0.874589	0.973929	1.26894	1.01114	1.17335	1.05494	0.795747	0.799194	1.2073	0.809501	1.19276
370	Smar_temp_008716:	5288	0	855	1852	982	1599	181	187	0	0	631	216	313	358	0	164	0	487	300	404	178	0	802	288	249	264	0	0	265	0	0	1.17776	1.23647	0.910088	0.831541	0.869623	1.04093	0.992538	1.12107	0.892437	0.961782	1.18632	0.83547	0.721412	1.01031	1.02113	1.30504
371	Smar_temp_003806:	753	0	158	238	158	199	42	16	0	0	56	35	44	46	0	37	0	65	56	49	27	0	72	70	56	38	0	0	43	0	0	0.482615	0.957136	0.881076	1.12137	1.03342	0.921125	1.26686	0.814413	1.0298	1.40171	1.11605	0.83821	0.779042	1.34114	0.910057	1.06482
372	Smar_temp_005924:	2174	0	364	545	433	832	74	77	0	0	383	124	99	107	0	43	0	173	183	139	100	0	178	120	94	127	0	0	152	0	0	1.06209	1.30283	0.912033	1.03012	0.829442	0.985732	0.858056	1.37934	0.917259	1.31505	0.705546	0.890136	0.66643	1.10433	0.911672	1.20285
373	Smar_temp_009460:	24130	167	4527	7868	4024	7544	773	810	0	9	3106	1001	1040	1144	156	1013	8	2193	1401	1739	872	0	3280	1702	1352	1290	0	0	1235	2	3	1.07294	1.27851	0.792626	0.915923	0.891518	0.871889	1.15192	1.15506	0.981668	1.15303	1.19274	0.70726	0.706954	1.11362	0.911454	1.31691
374	Smar_temp_004317:	617	0	94	188	115	220	19	14	0	0	82	31	33	31	0	12	0	69	49	56	27	0	63	37	22	33	0	0	38	0	0	0.799075	1.09979	0.941767	0.768108	1.02933	0.88469	0.886427	1.54107	0.926719	1.29182	0.837936	0.924903	0.835397	1.19498	0.984574	1.04533
375	Smar_temp_008773:	10048	0	1537	3284	1916	3311	396	360	0	0	1438	378	510	646	0	266	0	976	650	775	355	0	1329	533	469	447	0	0	519	0	0	1.22832	1.23822	0.814425	0.933631	0.901918	1.03161	1.08389	1.21126	0.822039	1.06104	1.13139	0.746343	0.716175	1.02953	0.88258	1.31801
376	Smar_temp_006651:	2866	0	500	892	567	907	114	112	0	0	372	125	138	193	0	91	0	273	203	197	123	0	331	171	150	135	0	0	137	0	0	1.13225	1.19227	0.782001	0.963901	0.96709	1.09367	1.01628	1.24345	0.763495	1.09885	1.04322	0.789967	0.697863	1.13131	0.853164	1.296
377	Smar_temp_007068:	3403	0	570	1307	508	1018	52	92	0	0	390	140	179	196	0	90	0	341	185	281	113	0	582	248	204	162	0	0	147	0	0	1.08121	1.1594	0.917436	0.931841	0.872154	1.00457	0.685706	1.32801	0.967315	1.13283	0.942659	0.821046	0.718695	1.21737	0.950067	1.28065
378	Smar_temp_011762:	4312	21	683	1363	702	1543	111	127	0	2	648	167	183	196	19	134	1	474	281	400	142	0	511	255	194	213	0	0	252	0	1	1.14215	1.18606	0.824702	0.898595	0.971841	0.883287	0.971242	1.27705	1.00317	1.18114	1.23863	0.683296	0.820119	1.11862	0.871509	1.1736
379	Smar_temp_005987:	1231	0	195	431	258	347	61	18	0	0	122	50	69	78	0	41	0	108	110	67	52	0	199	86	54	48	0	0	67	0	0	0.440429	1.31873	0.763854	0.790933	0.888945	0.863487	1.1281	1.27235	0.921263	1.25963	1.32731	0.909628	0.551475	1.51252	0.873243	1.24727
380	Smar_temp_001230:	5186	0	917	1473	1019	1777	192	135	0	0	658	359	270	260	0	148	0	433	422	395	240	0	543	274	227	302	0	0	327	0	0	0.749243	1.29786	0.932866	0.871538	0.857887	0.898316	0.958927	1.33199	0.936523	1.05199	0.912758	1.14254	0.782599	1.2086	0.961131	1.08065
381	Smar_temp_000090:	1106	0	174	383	177	372	29	28	0	0	146	54	45	55	0	28	0	109	75	108	30	0	155	64	73	43	0	0	63	0	0	1.00552	1.16866	0.734168	1.21152	0.846135	0.897317	1.02378	1.07734	1.05823	1.06215	1.02286	0.922692	0.838373	1.2598	0.734736	1.16687
382	Smar_temp_010546:	7140	0	934	2531	1345	2330	275	165	0	0	1003	257	388	495	0	162	0	696	517	545	201	0	1140	350	306	265	0	0	374	0	0	0.937806	1.27063	0.813796	0.924231	0.842674	1.03822	1.08539	1.14242	0.852102	1.05713	1.32593	0.843196	0.659852	1.17791	0.869443	1.31913
383	Smar_temp_008466:	18175	0	2509	6043	3250	6373	635	402	0	0	2691	723	944	1078	0	400	0	1967	1269	1615	546	0	2367	983	765	798	0	0	991	0	0	0.896017	1.17806	0.873596	0.917028	0.928287	0.997602	1.09265	1.21698	0.869603	1.17835	1.15487	0.821804	0.762168	1.11355	0.907053	1.2042
384	Smar_temp_004264:	2604	0	504	874	558	668	120	43	0	0	186	134	204	193	0	112	0	210	191	164	107	0	301	215	158	127	0	0	138	0	0	0.398148	1.02609	1.08924	0.93402	0.936639	1.03051	1.00358	0.990741	0.964072	1.27098	1.14815	1.03643	0.731471	1.33433	0.982285	1.08543
385	Smar_temp_010823:	7367	0	1256	2507	1095	2509	225	166	0	0	1072	301	320	332	0	282	0	802	384	646	204	0	1021	507	363	407	0	0	334	0	0	0.889191	1.19676	0.858761	0.849285	0.939312	0.890964	1.38244	1.09274	0.895617	1.18619	1.31692	0.703666	0.756603	1.02969	0.951469	1.25454
386	Smar_temp_008745:	3454	0	609	1120	643	1082	114	130	0	0	429	159	171	215	0	112	0	320	228	239	140	0	458	208	170	186	0	0	174	0	0	1.14667	1.26111	0.820143	0.860867	0.912068	1.03117	0.952369	1.23487	0.86384	1.0533	1.04305	0.833441	0.6812	1.13193	0.974969	1.26568
387	Smar_temp_012896:	22573	20	3714	7077	4698	7064	1104	912	0	1	2960	830	1045	1520	19	729	0	1969	1637	1389	771	0	2926	1242	1136	1078	0	0	1303	0	1	1.17986	1.31876	0.709485	0.975611	0.889068	1.03198	1.1291	0.997445	0.886278	1.06664	1.19298	0.714126	0.627179	1.11346	0.927503	1.339
388	Smar_temp_006348:	1894	0	328	604	325	637	65	58	0	0	274	80	87	107	0	68	0	184	114	141	53	0	234	122	99	108	0	0	99	0	0	1.03051	1.21485	0.839419	0.946465	0.905777	1.03239	1.16554	0.94167	0.905717	1.16635	1.19713	0.725198	0.694101	1.04295	0.979017	1.27894
389	Smar_temp_003944:	3252	0	547	1200	587	918	95	109	0	0	330	124	190	247	0	101	0	329	193	261	110	0	478	213	202	134	0	0	135	0	0	1.10396	1.07948	0.877172	1.00077	0.971231	1.14032	0.896598	1.11408	0.814711	1.05527	1.09773	0.803049	0.77049	1.16473	0.867811	1.27344
390	Smar_temp_002412:	966	0	155	260	205	346	33	47	0	0	156	39	50	67	0	27	0	86	75	63	39	0	87	42	37	52	0	0	65	0	0	1.42886	1.24322	0.906191	0.886898	0.923477	1.2143	0.758548	1.18565	0.885239	1.00675	1.08562	0.70248	0.676501	1.02143	0.93664	1.25878
391	Smar_temp_000337:	1738	0	269	610	283	576	54	23	0	0	207	84	89	94	0	49	0	200	117	160	50	0	242	113	78	92	0	0	85	0	0	0.525096	1.13033	0.896032	0.826156	0.989299	0.946371	1.17185	1.14151	0.906275	1.19687	1.1769	0.942224	0.791439	1.24746	1.03196	1.08436
392	Smar_temp_012870:	4293	0	622	1569	731	1371	137	103	0	0	583	169	220	299	0	101	0	440	271	318	115	0	703	249	206	199	0	0	179	0	0	0.972502	1.22594	0.823461	0.906181	0.878119	1.11916	1.10064	1.0858	0.766759	1.09533	1.12073	0.850785	0.63464	1.16085	1.00181	1.33154
393	Smar_temp_012158:	5532	40	1204	1360	1196	1732	299	379	0	1	791	252	201	298	38	282	1	395	317	277	306	0	492	291	270	346	0	0	293	1	1	1.45601	1.47153	0.68361	0.91218	0.927668	1.01351	1.15635	1.17556	0.782475	0.983127	1.07616	0.668511	0.650542	0.846569	0.917876	1.45869
394	Smar_temp_004727:	477	0	93	153	101	130	27	6	0	0	35	23	27	28	0	24	0	44	41	23	18	0	61	40	20	31	0	0	28	0	0	0.304695	1.24298	0.83343	0.670462	1.0552	0.864298	1.26252	0.914085	1.01721	1.34092	1.32362	0.907444	0.551584	1.48949	1.22308	0.98787
395	Smar_temp_000978:	6066	0	868	2206	1001	1991	159	121	0	0	752	262	319	357	0	131	0	635	402	567	143	0	928	353	324	270	0	0	342	0	0	0.844761	1.15675	0.876301	1.02641	0.877	0.980688	0.962568	0.998354	1.04093	1.11828	1.05471	0.919629	0.783085	1.22355	0.947709	1.15074
396	Smar_temp_003935:	4259	0	677	1387	652	1543	126	70	0	0	645	218	193	195	0	123	0	456	263	411	108	0	516	265	222	224	0	0	223	0	0	0.675413	1.14236	0.908952	1.00692	0.907465	0.918371	1.26236	1.04207	0.944059	1.20196	1.14297	0.888811	0.817913	1.1134	0.913274	1.15381
397	Smar_temp_000936:	3622	0	629	1152	604	1237	91	128	0	0	491	181	155	207	0	118	0	371	230	272	112	0	470	202	156	243	0	0	194	0	0	1.22031	1.28275	0.806846	0.779776	0.942975	1.07753	0.903475	1.06777	0.940467	1.00971	1.08026	0.842571	0.691346	1.11499	1.13119	1.16223
398	Smar_temp_008270:	21084	604	3603	5798	4499	6580	1127	953	0	1	2894	813	1031	1247	602	783	1	1627	1386	1240	879	0	2257	1054	882	1059	1	1	1245	0	0	1.23955	1.41556	0.833331	0.890183	0.899159	1.00792	1.17394	1.1433	0.886708	1.06378	1.2717	0.723025	0.685284	0.98713	0.9418	1.40929
399	Smar_temp_007548:	2281	0	441	716	481	643	126	118	0	0	286	77	102	155	0	85	0	159	135	74	79	0	325	161	129	148	0	0	121	0	0	1.26889	1.44605	0.675565	0.931887	0.787768	1.02659	1.24224	0.84951	0.89239	1.16305	0.996935	0.619393	0.366634	0.995642	1.19052	1.57786
400	Smar_temp_001282:	13316	20	2260	4333	2314	4389	428	299	0	0	1702	641	668	681	19	398	0	1299	918	1085	459	0	1646	921	719	684	1	0	746	0	1	0.76133	1.16742	0.887152	0.9777	0.909554	0.904417	1.06437	1.16873	0.978101	1.25238	1.03762	0.860514	0.759712	1.20361	0.918239	1.17653
401	Smar_temp_002749:	742	0	129	257	149	207	31	41	0	0	69	20	46	45	0	23	0	71	30	60	26	0	107	45	32	48	0	0	47	0	0	1.58275	1.20205	0.891338	0.716195	0.990282	0.871961	1.03608	1.00369	1.13069	1.00715	1.02554	0.555743	0.836858	0.72172	1.33378	1.19485
402	Smar_temp_007833:	1067	1	187	292	213	374	42	47	0	1	168	44	46	58	0	37	1	98	78	75	50	0	99	59	48	52	0	0	63	0	0	1.25904	1.23889	0.78915	0.937953	0.957494	0.995016	0.987767	1.33941	0.843828	1.1529	1.12897	0.67128	0.732776	1.04474	0.793331	1.28154
403	Smar_temp_005761:	4325	0	694	1432	685	1514	123	87	0	0	633	207	198	206	0	93	0	466	277	375	148	0	544	306	224	229	0	0	208	0	0	0.791508	1.14736	0.873007	0.974836	0.929615	0.90828	1.13373	1.34647	0.867427	1.3317	0.835122	0.852062	0.748081	1.15518	0.942619	1.19437
404	Smar_temp_008787:	428	0	62	172	50	144	7	5	0	0	47	25	12	13	0	3	0	51	26	45	9	0	84	29	24	26	0	0	21	0	0	0.690323	1.21525	0.597209	0.963241	0.881298	0.646977	1.1984	1.24258	1.24833	1.16392	0.334027	1.19848	0.777616	1.54556	1.24642	0.9701
405	Smar_temp_003384:	1640	0	261	625	340	414	65	73	0	0	152	56	124	150	0	39	0	142	78	124	62	0	258	93	100	60	0	0	63	0	0	1.34911	1.08319	0.956988	1.00536	0.900019	1.15765	0.922145	1.14582	0.734015	0.934989	0.938918	0.849945	0.785932	0.908781	0.910656	1.45441
406	Smar_temp_002043:	1843	0	308	641	299	595	57	85	0	0	251	54	60	103	0	51	0	214	97	141	63	0	278	118	88	106	0	0	76	0	0	1.70107	1.24696	0.576962	0.821484	1.0341	0.990452	1.17505	1.26079	0.787319	1.10154	0.990818	0.543064	0.681349	1.00487	1.06602	1.30667
407	Smar_temp_002955:	1574	0	233	452	259	630	43	34	0	0	336	64	72	73	0	48	0	115	110	102	29	0	190	87	75	81	0	0	114	0	0	0.886805	1.4638	0.968053	1.12091	0.635658	0.981498	1.00896	0.756392	1.09969	1.30026	1.39166	0.686259	0.563801	1.0611	0.868547	1.33249
408	Smar_temp_006743:	609	0	101	210	97	201	12	21	0	0	77	25	24	33	0	19	0	64	40	51	17	0	89	36	32	33	0	0	35	0	0	1.3054	1.22905	0.717526	0.918812	0.923383	0.986598	0.776703	1.05675	1.09325	1.03366	1.1343	0.749963	0.735821	1.24942	0.989951	1.16069
409	Smar_temp_000479:	621	0	80	245	82	214	12	3	0	0	90	29	37	30	0	9	0	66	30	69	11	0	107	38	35	25	0	0	29	0	0	0.283994	1.10699	1.1437	1.10893	0.781728	0.927327	1.10827	1.04131	1.02627	1.20398	0.873281	1.05193	0.817261	1.06166	0.906834	1.22041
410	Smar_temp_007681:	476	0	86	118	128	144	35	25	0	0	50	18	27	29	0	14	0	39	41	30	27	0	29	29	22	23	0	0	37	0	0	1.08103	0.991382	0.8509	1.03193	1.09251	0.91393	1.01685	1.16751	0.955512	1.36027	0.901028	0.69186	0.840395	1.05881	0.884044	1.14776
411	Smar_temp_003584:	2488	0	439	793	579	677	123	82	0	0	224	119	162	194	0	89	0	179	212	127	108	0	323	149	128	114	0	0	154	0	0	0.802641	1.27793	0.877837	0.914793	0.829548	1.05124	0.912848	1.05714	0.977471	1.06488	1.14898	0.996195	0.588562	1.34561	0.954338	1.21596
412	Smar_temp_009863:	3044	0	458	1101	484	1001	69	67	0	0	382	133	150	171	0	72	0	334	198	276	92	0	468	185	149	145	0	0	152	0	0	0.920044	1.17521	0.856847	0.899452	0.922507	0.976805	0.896609	1.26334	0.955012	1.11677	1.04483	0.883073	0.762311	1.24403	0.962749	1.16049
413	Smar_temp_009744:	2371	0	364	729	434	844	104	60	0	0	358	106	107	107	0	61	0	233	163	199	76	0	285	137	103	124	0	0	147	0	0	0.900517	1.27151	0.801859	0.920322	0.897878	0.801859	1.30914	1.14065	0.951517	1.22412	1.09159	0.818076	0.766857	1.05508	0.956994	1.1916
414	Smar_temp_006380:	1797	0	225	657	295	620	46	61	0	0	276	46	83	101	0	45	0	194	104	177	44	0	306	73	73	63	0	0	104	0	0	1.65148	1.27391	0.769553	0.887407	0.85584	0.936445	0.949865	1.19123	1.0218	0.887407	1.59733	0.592559	0.780844	1.0218	0.811548	1.29025
415	Smar_temp_006243:	4169	0	665	1316	741	1447	132	159	0	0	613	188	198	252	0	94	0	433	252	348	144	0	491	224	193	234	0	0	213	0	0	1.34521	1.18196	0.846492	0.919415	0.947972	1.07735	1.00223	1.2183	0.82818	1.06709	0.886169	0.814516	0.76188	0.979819	1.01381	1.22055
416	Smar_temp_009577:	2009	0	336	598	371	704	81	59	0	0	283	99	87	100	0	59	0	202	144	164	70	0	215	118	94	113	0	0	120	0	0	0.950865	1.20786	0.787815	0.939869	0.963957	0.905534	1.18227	1.12814	0.923027	1.17984	1.04991	0.84082	0.782618	1.10763	0.959724	1.14715
417	Smar_temp_011136:	4775	0	672	1637	908	1558	168	143	0	0	658	186	279	343	0	93	0	471	318	365	154	0	678	250	208	217	0	0	243	0	0	1.11906	1.20811	0.896279	0.902857	0.881816	1.10188	0.972996	1.20514	0.820212	1.08516	0.983372	0.8483	0.683361	1.07336	0.989684	1.29439
418	Smar_temp_011993:	3003	0	507	896	595	1005	135	132	0	0	418	125	130	196	0	85	0	311	198	225	113	0	310	165	144	164	0	0	151	0	0	1.31403	1.15958	0.732274	0.951923	1.03715	1.10404	1.14513	1.12489	0.758314	1.09075	0.993021	0.736701	0.75035	0.994346	0.966552	1.24279
419	Smar_temp_009485:	22604	0	3721	7041	4210	7632	886	759	0	0	3220	1015	1055	1351	0	644	0	2177	1509	1714	753	0	2673	1303	1136	1188	0	0	1220	0	0	1.09518	1.21875	0.804491	0.980098	0.915738	1.03021	1.12994	1.08652	0.858271	1.12418	1.05136	0.807892	0.72098	1.06158	0.945592	1.24958
420	Smar_temp_002586:	21766	1	3619	6872	4266	7008	862	811	0	1	2957	912	1205	1431	0	599	1	1926	1388	1491	762	0	2653	1297	1087	1171	0	0	1211	0	0	1.14338	1.22278	0.894668	0.951341	0.870478	1.06246	1.03097	1.0743	0.881674	1.13513	0.99547	0.782692	0.673875	1.01054	1.00497	1.31051
421	Smar_temp_004699:	1956	0	323	662	360	611	63	68	0	0	216	79	101	105	0	50	0	200	128	167	75	0	263	126	98	100	0	0	116	0	0	1.14386	1.17384	0.828953	0.896467	0.967163	0.861782	0.950833	1.26161	1.03153	1.1526	0.937419	0.782983	0.807581	1.13824	0.991117	1.13172
422	Smar_temp_012014:	2455	0	455	732	520	748	121	130	0	0	299	106	116	163	0	88	0	213	152	164	106	0	275	130	128	133	0	0	130	0	0	1.3489	1.25998	0.748161	0.943494	0.955033	1.0513	1.09858	1.09987	0.820521	0.958236	1.04355	0.764618	0.735331	0.959379	0.959379	1.31196
423	Smar_temp_002228:	3973	0	600	1334	647	1392	127	96	0	0	603	141	164	217	0	109	0	456	260	340	112	0	523	254	191	188	0	0	191	0	0	0.982504	1.16764	0.754922	0.94808	0.975637	0.998891	1.20535	1.14625	0.842575	1.2608	1.20294	0.670729	0.727449	1.14696	0.894306	1.2364
424	Smar_temp_007701:	6516	0	1036	2007	1160	2313	225	206	0	0	1029	285	289	336	0	178	0	641	440	534	241	0	769	367	307	310	0	0	358	0	0	1.11694	1.24398	0.80886	0.962083	0.899738	0.940405	1.08955	1.30671	0.869422	1.15011	1.08064	0.77498	0.749548	1.06856	0.842961	1.25327
425	Smar_temp_004622:	10767	0	1687	3967	1747	3366	325	247	0	0	1195	474	473	594	0	267	0	1159	702	997	290	0	1676	699	659	471	0	0	538	0	0	0.902368	1.14669	0.734853	1.06024	0.934548	0.922839	1.14655	1.05946	0.985077	1.12459	1.01013	0.89876	0.803921	1.28536	0.893072	1.13562
426	Smar_temp_008186:	11284	0	1850	3742	1974	3718	336	497	0	0	1656	448	507	710	0	345	0	1080	634	871	393	0	1601	560	554	557	0	0	534	0	0	1.53568	1.29017	0.774498	0.90302	0.875939	1.0846	0.972989	1.21433	0.821009	0.9128	1.13747	0.734954	0.706428	0.974756	0.913771	1.35178
427	Smar_temp_008742:	3083	0	475	1135	487	986	70	80	0	0	355	129	150	157	0	76	0	338	187	300	96	0	488	189	159	144	0	0	164	0	0	1.06621	1.16789	0.836643	0.909246	0.931145	0.875686	0.909942	1.27945	1.05296	1.0808	1.03848	0.849166	0.82646	1.20063	0.947906	1.12577
428	Smar_temp_000763:	3337	0	667	942	640	1088	131	135	0	0	420	184	143	161	0	138	0	273	230	227	137	0	345	209	181	211	0	0	211	0	0	1.05532	1.2974	0.791519	0.961298	0.888872	0.891151	1.06725	1.07095	1.01118	1.11001	1.0351	0.846095	0.739098	1.10224	0.970251	1.18399
429	Smar_temp_010871:	16979	261	2549	5228	2867	6074	543	448	0	3	2911	760	800	963	256	438	2	1546	1075	1222	507	0	2138	903	740	864	0	0	854	2	3	1.04086	1.32815	0.906231	0.942841	0.82663	1.09088	1.12165	1.17794	0.83266	1.15052	1.14458	0.833453	0.653391	1.04814	0.947504	1.33969
430	Smar_temp_009582:	995	0	143	318	161	373	33	30	0	0	192	38	42	53	0	18	0	90	56	77	23	0	131	57	54	48	0	0	52	0	0	1.29653	1.28896	0.816243	1.18155	0.75497	1.03002	1.26673	0.994006	0.861572	1.2472	0.875837	0.708862	0.645919	0.927847	0.895405	1.37311
431	Smar_temp_009145:	4174	0	746	1202	771	1455	167	152	0	0	561	229	173	194	0	128	0	413	279	375	157	0	395	237	221	240	0	0	252	0	0	1.10307	1.14114	0.779183	1.02873	0.985678	0.873766	1.17263	1.13935	0.937639	1.10321	0.96003	0.880615	0.894986	1.0381	0.922915	1.10609
432	Smar_temp_006020:	6166	0	988	2146	1199	1833	209	291	0	0	777	192	352	482	0	177	0	555	347	413	199	0	922	328	316	296	0	0	309	0	0	1.51468	1.23445	0.843524	0.918976	0.86997	1.15505	0.89642	1.03581	0.866923	0.953873	1.11805	0.65371	0.647383	0.973535	1.0078	1.42593
433	Smar_temp_001358:	544	0	116	161	91	176	19	19	0	0	72	25	18	22	0	32	0	51	35	41	21	0	57	40	35	28	0	0	28	0	0	0.979159	1.19625	0.66835	1.01949	0.979108	0.816873	1.24816	1.08223	0.951049	1.16513	1.2937	0.666144	0.787126	1.18881	0.746082	1.26446
434	Smar_temp_001960:	3838	0	716	1269	727	1126	132	93	0	0	378	191	239	251	0	146	0	357	263	271	144	0	460	286	212	214	0	0	200	0	0	0.68571	1.09633	0.994276	0.895501	0.9589	1.0442	0.95854	1.06174	0.937696	1.20808	1.09303	0.909258	0.727904	1.23307	1.01875	1.14425
435	Smar_temp_013131:	18986	21	2883	6423	3210	6449	591	664	0	0	2929	612	679	1104	19	475	0	1993	1276	1345	601	1	2842	1131	907	899	0	0	914	1	2	1.36223	1.30792	0.625259	0.929947	0.913504	1.01662	1.08896	1.23299	0.838267	1.15961	1.08502	0.624954	0.616489	1.17027	0.918028	1.33711
436	Smar_temp_011446:	3478	0	575	1126	678	1099	115	173	0	0	463	152	180	257	0	79	0	310	210	250	132	0	447	171	188	176	0	0	174	0	0	1.5434	1.2262	0.820038	1.00991	0.871275	1.17083	0.870098	1.17762	0.812178	0.918585	0.831038	0.83658	0.702641	0.980215	0.968672	1.33326
437	Smar_temp_007595:	38060	40	5893	11822	6902	13403	1525	979	0	1	6038	1675	1728	1962	38	1030	1	3624	2670	2786	1350	1	4864	2209	1604	1908	0	0	2065	0	1	0.916094	1.32459	0.806021	0.876286	0.87049	0.91517	1.2184	1.26326	0.849595	1.20681	1.12884	0.807133	0.669202	1.09851	0.919409	1.27926
438	Smar_temp_002451:	1204	0	173	383	269	379	67	44	0	0	149	52	64	74	0	22	0	106	93	85	56	0	169	55	44	51	0	0	72	0	0	1.13836	1.38713	0.74792	0.799529	0.879214	0.864783	1.1148	1.44883	0.850291	0.999411	0.885028	0.954871	0.70503	1.09829	0.936508	1.24892
439	Smar_temp_008597:	783	0	126	216	157	284	39	27	0	0	146	28	44	40	0	21	0	60	47	49	27	0	76	50	36	42	0	0	50	0	0	1.0687	1.27546	1.01592	1.03571	0.765845	0.923567	1.23887	1.0687	0.878039	1.43849	1.03571	0.612676	0.62544	0.825357	0.919014	1.41735
440	Smar_temp_003713:	302	0	45	114	50	93	3	5	0	0	33	11	18	20	0	6	0	33	24	21	11	0	49	23	14	14	0	0	16	0	0	0.671111	1.13866	0.953684	0.824172	0.940011	1.05965	0.3624	1.47644	1.03914	1.354	0.894815	0.793787	0.598189	1.55871	1.01027	1.15227
441	Smar_temp_007354:	6021	0	999	1888	1083	2051	234	175	0	0	893	256	254	355	0	185	0	610	420	420	203	0	730	383	294	317	0	0	291	0	0	0.973896	1.23307	0.747949	0.938531	0.948486	1.04536	1.20123	1.12972	0.788801	1.22264	1.11612	0.752276	0.653056	1.13848	0.93153	1.27817
442	Smar_temp_007707:	1132	0	188	383	223	338	35	42	0	0	132	45	67	81	0	34	0	91	79	74	37	0	160	67	64	53	0	0	70	0	0	1.13405	1.23472	0.888009	1.00617	0.795742	1.07356	0.796718	0.999046	1.05129	1.05333	1.08895	0.801649	0.647087	1.18646	0.944165	1.30794
443	Smar_temp_011882:	10445	0	1718	3084	2157	3486	420	527	0	0	1498	372	422	705	0	284	0	982	788	705	397	0	1138	535	542	495	0	0	634	0	0	1.48541	1.24975	0.662608	1.06849	0.954065	1.10696	0.942882	1.11899	0.880684	1.05469	1.00503	0.648785	0.684945	1.0946	0.863303	1.28755
444	Smar_temp_010009:	1890	0	329	609	382	570	84	79	0	0	273	67	118	124	0	60	0	130	101	96	74	0	265	123	95	100	0	0	100	0	0	1.18804	1.35043	0.958657	0.896132	0.707804	1.0074	1.08796	1.11284	0.868008	1.16026	1.04766	0.675252	0.522686	0.876688	1.00784	1.58809
445	Smar_temp_003429:	546	0	98	193	113	142	20	25	0	0	48	15	26	45	0	17	0	54	42	29	23	0	77	41	35	23	0	0	25	0	0	1.23262	1.12867	0.650924	1.01036	1.07582	1.1266	0.855196	1.13401	0.850679	1.18357	0.966472	0.588531	0.577757	1.42914	0.902414	1.29974
446	Smar_temp_006713:	2756	0	424	873	563	896	111	112	0	0	401	104	158	215	0	72	0	270	182	181	116	0	340	136	104	132	0	0	121	0	0	1.29307	1.2295	0.885959	0.774341	0.951307	1.20558	0.965129	1.33925	0.661071	1.0126	1.10377	0.754464	0.637728	0.994338	0.957589	1.3766
447	Smar_temp_006008:	3694	0	690	1081	624	1299	117	119	0	0	589	199	160	186	0	152	0	312	228	241	122	0	433	220	175	241	0	0	199	0	0	1.02096	1.36878	0.876207	0.866683	0.820761	1.01859	1.10998	1.0467	0.906893	1.08954	1.17935	0.820147	0.633985	1.03905	0.993243	1.28942
448	Smar_temp_003107:	12866	0	2330	4562	2007	3967	323	357	0	0	1429	602	584	668	0	423	0	1327	742	1108	407	0	1838	948	812	688	0	0	609	0	0	0.982219	1.13626	0.820642	0.982853	0.943402	0.93868	1.03169	1.11979	0.984127	1.14747	1.00247	0.837957	0.787709	1.19905	0.957666	1.16829
449	Smar_temp_007486:	1900	0	357	619	397	527	78	120	0	0	211	70	101	154	0	60	0	151	98	106	70	0	251	107	115	112	0	0	95	0	0	1.6087	1.24465	0.780897	0.988764	0.879487	1.19067	0.940302	0.938411	0.862732	0.91998	0.894475	0.706924	0.617388	0.889977	1.13108	1.44349
450	Smar_temp_005221:	5163	0	889	1799	886	1589	183	129	0	0	611	249	271	305	0	173	0	465	303	409	134	0	746	338	316	266	0	0	264	0	0	0.845583	1.19009	0.877822	1.02013	0.839847	0.987955	1.20361	0.878358	0.968163	1.09115	1.13017	0.910072	0.738704	1.11119	0.972206	1.24938
451	Smar_temp_004625:	2198	0	314	700	415	769	87	74	0	0	342	74	102	133	0	40	0	243	151	182	84	0	259	126	96	94	0	0	110	0	0	1.24819	1.1618	0.771759	0.96	0.992224	1.00631	1.11033	1.41687	0.75761	1.26	0.89172	0.673602	0.743147	1.03999	0.855657	1.27116
452	Smar_temp_012566:	17516	209	2924	5412	3157	5814	589	684	0	1	2580	656	751	1005	207	513	1	1636	1133	1127	621	0	2208	1071	816	973	0	0	941	1	1	1.29789	1.32044	0.769915	0.903212	0.910721	1.03031	1.03514	1.17835	0.897997	1.18547	1.05099	0.675906	0.627373	1.08122	1.00253	1.33692
453	Smar_temp_009469:	6242	0	972	2115	1062	2093	185	139	0	0	861	293	314	332	0	143	0	602	424	519	209	0	867	397	331	289	0	0	336	0	0	0.840519	1.20982	0.872607	1.00502	0.848869	0.922629	1.02387	1.2638	0.94356	1.20542	0.944773	0.898992	0.731832	1.19068	0.886719	1.22684
454	Smar_temp_001222:	3911	0	638	1297	628	1348	99	101	0	0	558	180	172	168	0	103	0	400	256	355	151	0	519	254	205	179	0	0	210	0	0	0.985891	1.20663	0.825879	0.968905	0.894783	0.806673	0.981756	1.47396	0.970192	1.2005	0.989655	0.818559	0.79412	1.18271	0.814011	1.201
455	Smar_temp_002500:	7300	0	1316	2389	1327	2268	294	197	0	0	861	362	373	387	0	292	0	654	462	567	255	0	970	465	391	378	0	0	391	0	0	0.823497	1.24069	0.858904	0.907878	0.881133	0.891142	1.21879	1.06595	0.948387	1.0797	1.23082	0.885386	0.763918	1.1206	0.924519	1.22191
456	Smar_temp_012245:	5652	0	805	1830	987	2030	208	175	0	0	924	210	251	321	0	130	0	599	353	476	162	0	743	290	236	277	0	0	296	0	0	1.24488	1.25397	0.78543	0.905456	0.911343	1.00447	1.20679	1.1524	0.834989	1.11264	1.13385	0.726323	0.724206	0.995781	0.958054	1.26731
457	Smar_temp_000381:	381	0	80	103	103	95	22	35	0	0	36	9	24	33	0	18	0	27	22	14	24	0	37	18	15	23	0	0	23	0	0	1.61833	1.32878	0.86191	0.693568	1.0513	1.18513	0.790084	1.10971	0.895554	0.832282	1.07156	0.451184	0.54512	0.856617	1.15303	1.51978
458	Smar_temp_012737:	870	20	140	292	123	295	18	25	0	1	130	34	36	35	19	31	0	90	44	76	28	0	130	50	36	45	0	1	40	0	0	1.26307	1.32647	0.872035	0.766145	0.908985	0.847812	1.0351	1.41463	0.959074	1.06409	1.37602	0.716223	0.767588	1.05498	0.947942	1.29963
459	Smar_temp_009860:	6707	0	1042	2406	1021	2238	156	175	0	0	875	280	323	342	0	157	0	752	367	667	191	0	967	430	364	329	0	0	331	0	0	1.10325	1.12038	0.88188	0.973792	0.936678	0.933755	1.00369	1.20412	0.971562	1.15036	0.969823	0.805302	0.830804	1.07723	0.946229	1.1717
460	Smar_temp_010797:	3349	0	599	1045	635	1070	129	138	0	0	444	145	171	197	0	134	0	295	197	253	122	0	413	182	166	176	0	0	186	0	0	1.21505	1.26658	0.863021	0.888137	0.883562	0.99424	1.07141	1.07417	0.916792	0.973741	1.25074	0.757657	0.757767	0.97101	0.919639	1.29876
461	Smar_temp_002334:	5327	0	830	1669	973	1855	210	150	0	0	813	270	259	296	0	144	0	502	354	426	198	0	681	266	226	262	0	0	269	0	0	0.989425	1.30232	0.849598	0.869074	0.863746	0.970969	1.18162	1.30604	0.793923	1.02289	1.1135	0.934167	0.73298	1.04479	0.906488	1.25859
462	Smar_temp_011309:	13479	0	2330	4187	2557	4405	520	611	0	0	1939	519	656	822	0	453	0	1237	769	983	505	0	1635	747	659	713	0	0	710	0	0	1.38233	1.2571	0.825901	0.910509	0.904021	1.03489	1.07201	1.14252	0.849649	1.03209	1.12472	0.68159	0.718393	0.920253	0.936365	1.34693
463	Smar_temp_002899:	3417	0	709	1103	578	1027	127	174	0	0	419	143	126	178	0	176	0	319	151	245	127	0	464	216	193	212	0	0	146	0	0	1.45084	1.3032	0.675324	0.843297	0.962254	0.954029	1.29895	1.05895	0.840426	0.943794	1.19637	0.671065	0.739035	0.869208	0.994865	1.35743
464	Smar_temp_012113:	6538	0	1175	2209	980	2174	145	213	0	0	905	307	261	358	0	249	0	655	360	519	170	0	927	405	366	390	0	0	307	0	0	1.20937	1.24203	0.788249	0.921918	0.891725	1.0812	0.987099	0.965228	0.942101	1.02016	1.17915	0.785753	0.706573	1.10474	0.998187	1.25191
465	Smar_temp_007745:	2428	0	397	863	420	748	82	65	0	0	297	105	128	165	0	55	0	255	145	191	83	0	336	171	144	115	0	0	90	0	0	0.946504	1.09538	0.85743	1.02049	0.959128	1.10528	1.12866	1.20861	0.695569	1.21183	0.847287	0.858511	0.718406	1.12064	0.940274	1.28885
466	Smar_temp_003203:	684	0	106	283	165	130	34	28	0	0	28	25	55	74	0	12	0	49	48	35	29	0	132	41	46	19	0	0	28	0	0	1.09503	1.12735	0.805654	1.04887	0.911008	1.08397	0.854215	1.13413	0.892867	0.934862	0.730509	1.24093	0.65072	1.53063	0.943106	1.13325
467	Smar_temp_006823:	5569	20	810	1896	953	1890	201	152	0	0	832	196	252	299	19	132	1	597	348	466	188	0	799	330	248	242	0	0	265	1	0	1.09659	1.23779	0.776688	0.899302	0.927794	0.921546	1.2325	1.3563	0.819348	1.19665	1.12042	0.712995	0.724207	1.07597	0.880331	1.29711
468	Smar_temp_007222:	255	0	36	88	64	67	20	0	0	0	19	11	14	25	0	6	0	25	30	8	7	0	35	19	13	10	0	0	12	0	0	0	1.15251	0.633878	1.0464	1.08124	1.13192	1.24512	0.77474	0.713619	1.52936	1.18056	1.16294	0.345997	1.78405	1.05721	1.0793
469	Smar_temp_009010:	25914	0	3912	7766	5127	9109	1059	745	0	0	3953	1222	1320	1609	0	597	0	2386	2003	1866	911	0	2942	1348	1118	1286	0	0	1548	0	0	0.962562	1.2641	0.859108	0.95363	0.874051	1.0472	1.04401	1.17704	0.858957	1.14982	1.01091	0.888661	0.683562	1.11143	0.935203	1.23458
470	Smar_temp_007301:	5926	0	879	1952	1114	1981	221	150	0	0	837	242	332	376	0	136	0	605	411	478	220	0	747	351	268	255	0	0	296	0	0	0.907776	1.16178	0.904763	0.925609	0.927156	1.02467	1.05532	1.33141	0.794847	1.21227	1.04309	0.823576	0.73253	1.10366	0.867818	1.26392
471	Smar_temp_006449:	4988	0	746	1585	833	1824	152	131	0	0	804	233	219	268	0	106	0	506	331	421	132	0	619	276	240	268	0	0	281	0	0	1.05151	1.22902	0.827363	1.01244	0.873017	1.01248	1.09265	1.05954	0.922493	1.16431	0.950068	0.85412	0.726364	1.08664	0.982421	1.2054
472	Smar_temp_012296:	408	0	74	136	80	118	14	6	0	0	37	20	28	29	0	11	0	39	32	28	15	0	41	37	27	21	0	0	22	0	0	0.413514	0.904412	1.05	1.09459	0.991525	1.0875	0.8925	1.03378	0.950847	1.5	0.819576	0.934494	0.711864	1.38305	0.981219	1.08417
473	Smar_temp_004829:	6389	96	1124	2108	1058	2003	192	113	0	0	786	351	322	311	94	195	0	564	431	464	253	0	866	465	353	322	0	0	302	2	2	0.607099	1.24512	0.922428	0.951855	0.853415	0.890917	1.09588	1.35926	0.910486	1.25386	0.986132	0.996077	0.702101	1.2994	0.91378	1.25168
474	Smar_temp_009007:	24214	126	3671	7671	4427	8319	836	633	1	1	3609	1099	1234	1486	124	538	1	2297	1724	1808	792	1	2976	1400	1163	1177	0	0	1313	0	0	0.94314	1.2246	0.879873	1.00002	0.871574	1.05956	1.03289	1.18004	0.863278	1.20381	0.966674	0.871382	0.686028	1.1335	0.933227	1.26273
475	Smar_temp_006494:	8346	0	1311	2877	1410	2748	222	299	0	0	1103	317	361	471	0	242	0	889	527	725	278	0	1228	453	398	393	0	0	439	0	0	1.34998	1.23822	0.742723	0.880682	0.938477	0.969037	0.931951	1.25517	0.945599	1.00238	1.17514	0.734376	0.765349	1.13515	0.91044	1.21905
476	Smar_temp_008017:	1811	0	347	615	287	562	48	65	0	0	230	76	77	97	0	70	0	189	97	127	75	0	255	135	94	108	0	0	67	0	0	1.18201	1.22098	0.790046	0.797704	0.990305	0.995252	1.05535	1.36386	0.752272	1.14564	1.05283	0.705775	0.665443	1.08911	1.00294	1.31878
477	Smar_temp_003194:	2197	0	483	798	378	538	83	44	0	0	169	97	141	146	0	140	0	185	110	167	61	0	282	202	190	92	0	0	87	0	0	0.529473	0.972912	1.02696	1.08301	0.946709	1.06338	1.27622	0.734042	0.939886	1.15141	1.31845	0.820111	0.854597	1.18836	0.777837	1.28278
478	Smar_temp_002635:	24654	21	4050	8193	4323	8067	835	783	0	1	3359	991	1126	1475	19	745	0	2529	1579	1925	824	1	3262	1531	1275	1204	0	2	1187	0	0	1.10258	1.19808	0.783786	0.947326	0.943368	1.02672	1.10155	1.16031	0.839152	1.13753	1.11978	0.747815	0.718064	1.11628	0.908546	1.27255
479	Smar_temp_012957:	3477	0	624	1118	642	1093	119	105	0	0	433	162	198	216	0	142	0	303	220	226	112	0	460	215	157	213	0	0	195	0	0	0.911327	1.27961	0.959164	0.782488	0.862155	1.04636	1.00388	0.972082	0.966238	1.07156	1.26801	0.825876	0.64306	1.09011	1.08587	1.26024
480	Smar_temp_001851:	14722	0	2307	4903	2470	5042	445	305	0	0	2076	658	679	816	0	367	0	1545	1041	1201	447	0	1909	977	770	723	0	0	762	0	0	0.787993	1.16909	0.825425	1.00219	0.920091	0.991969	1.07382	1.15486	0.900787	1.2716	1.01517	0.832803	0.715229	1.2306	0.915071	1.20223
481	Smar_temp_008648:	34071	0	5357	10578	6100	12036	1160	846	0	0	5186	1795	1727	1904	0	811	0	3205	2367	2597	1186	0	4172	1905	1473	1886	0	0	1850	0	0	0.882071	1.27035	0.911893	0.885651	0.857684	1.00535	1.06214	1.23657	0.858508	1.14539	0.962858	0.948518	0.694978	1.09843	0.996604	1.2197
482	Smar_temp_000798:	946	0	133	287	174	352	33	19	0	0	147	37	56	51	0	23	0	104	65	88	25	0	94	54	33	52	0	0	64	0	0	0.776683	1.07958	1.06084	0.817846	0.973868	0.966118	1.03111	1.02195	0.988506	1.33829	1.23003	0.74765	0.824042	1.00395	1.05075	1.12234
483	Smar_temp_011461:	954	0	204	311	181	258	35	55	0	0	99	39	43	67	0	41	0	80	48	52	38	0	122	69	66	59	0	0	40	0	0	1.42103	1.20334	0.728749	0.992434	0.95117	1.13549	1.0192	0.9818	0.817166	1.03754	0.939879	0.706908	0.618261	0.980599	1.06943	1.41888
484	Smar_temp_001219:	4888	0	746	1681	797	1664	128	128	0	0	722	186	237	266	0	124	0	520	304	420	167	0	686	308	237	218	0	0	236	0	0	1.05231	1.18664	0.864676	0.923789	0.908685	0.97048	0.984973	1.37294	0.869824	1.20054	1.08912	0.732406	0.733938	1.12045	0.858412	1.27456
485	Smar_temp_007170:	3315	0	623	1015	746	931	178	134	0	0	330	130	187	239	0	136	0	294	247	185	152	0	367	223	166	169	0	0	177	0	0	0.955788	1.18091	0.818691	0.870237	1.03137	1.04635	1.06029	1.08418	0.844828	1.16905	1.16157	0.743001	0.648992	1.17894	0.965901	1.26211
486	Smar_temp_000690:	14127	0	2435	4619	2689	4384	497	627	0	0	1764	564	655	1008	0	409	0	1374	910	937	502	0	1839	834	751	773	0	0	682	0	0	1.35278	1.21769	0.744993	0.943285	0.958558	1.14649	0.971012	1.08309	0.817284	1.04754	0.974485	0.746379	0.653689	1.09051	1.02296	1.2966
487	Smar_temp_009369:	2936	0	528	933	541	934	102	119	0	0	334	137	126	168	0	109	0	286	194	236	94	0	365	163	155	170	0	0	177	0	0	1.22313	1.23108	0.732905	0.923788	0.963593	0.977207	1.0232	0.966168	1.02845	0.971467	1.14793	0.815635	0.795133	1.12723	1.0121	1.12411
488	Smar_temp_006609:	1965	0	277	602	386	700	89	50	0	0	289	80	95	115	0	49	0	203	152	166	55	0	223	98	80	93	0	0	127	0	0	0.918894	1.20913	0.803345	0.942706	0.946595	0.972471	1.17376	1.01078	0.923594	1.15481	1.25487	0.810727	0.774063	1.1054	0.94247	1.15895
489	Smar_temp_006937:	6653	0	1194	2290	1045	2124	198	263	0	0	915	282	258	373	0	229	0	631	326	494	178	0	1003	420	397	389	0	0	296	0	0	1.40234	1.27247	0.717275	0.96598	0.863092	1.03699	1.20629	0.949111	0.887235	1.02194	1.06867	0.739789	0.675701	0.977157	1.02049	1.34937
490	Smar_temp_000721:	5163	20	946	1632	937	1628	155	135	0	1	603	258	269	278	19	152	1	460	378	356	198	0	597	400	306	290	0	0	306	0	0	0.786331	1.15727	0.908228	1.02332	0.893893	0.938614	0.911496	1.15328	1.03569	1.33768	0.876927	0.864921	0.691795	1.27938	0.972198	1.17466
491	Smar_temp_009376:	4376	0	549	1555	614	1658	94	140	0	0	832	100	126	290	0	79	0	571	254	331	75	0	703	230	155	240	0	0	155	0	0	1.81746	1.27225	0.577496	0.794523	0.969167	1.32916	1.09111	0.973639	0.666279	1.17897	1.14699	0.480751	0.561811	1.09184	1.1538	1.32444
492	Smar_temp_012326:	2815	0	539	897	536	843	104	89	0	0	290	133	142	156	0	107	0	270	201	192	126	0	338	210	147	159	0	0	150	0	0	0.867191	1.18252	0.831399	0.855883	1.00513	0.913368	1.01902	1.22771	0.934496	1.22269	1.03678	0.823974	0.714759	1.25222	0.985052	1.14874
493	Smar_temp_011988:	21558	0	4330	6555	4410	6263	909	1202	0	0	2387	937	1010	1393	0	920	0	1773	1289	1236	943	0	2655	1271	1117	1350	0	0	1165	0	0	1.35702	1.33207	0.753214	0.848401	0.931027	1.03884	1.00762	1.06462	0.909313	0.965369	1.05784	0.744865	0.649041	1.0061	1.07318	1.31189
494	Smar_temp_002999:	2631	0	410	882	406	933	68	71	0	0	389	112	111	119	0	66	0	293	156	257	81	0	346	160	132	131	0	0	138	0	0	1.1222	1.1702	0.815547	0.960378	0.936781	0.874326	1.08537	1.28025	0.9585	1.16409	1.03299	0.770324	0.821682	1.08352	0.901004	1.17573
495	Smar_temp_010824:	5948	0	819	1809	1185	2135	345	166	0	0	1000	207	257	319	0	154	0	559	417	436	151	0	761	292	232	282	0	0	369	0	0	1.01737	1.38318	0.713095	0.931401	0.860887	0.885125	1.46135	0.925434	0.867523	1.17228	1.3656	0.704141	0.671461	0.980372	0.959264	1.30489
496	Smar_temp_009000:	8018	0	1274	2638	1461	2645	290	278	0	0	1141	332	404	530	0	208	0	784	489	611	253	0	1040	456	409	404	0	0	388	0	0	1.19754	1.19826	0.84047	0.975765	0.90091	1.1026	1.08934	1.08985	0.805048	1.08789	1.02752	0.789967	0.702113	1.01461	0.961285	1.30768
497	Smar_temp_008357:	2700	0	463	792	496	949	110	137	0	0	380	112	76	119	0	74	0	286	173	243	95	0	290	140	140	153	0	0	171	0	0	1.61073	1.24828	0.522361	1.03083	1.0274	0.817907	1.20724	1.11693	0.980871	1.03083	0.932038	0.688232	0.872928	0.992343	0.940173	1.13924
498	Smar_temp_005938:	6054	0	994	1764	1085	2211	229	247	0	0	962	284	219	351	0	185	0	668	390	475	208	0	659	278	217	384	0	0	297	0	0	1.38651	1.28213	0.692721	0.749233	1.03689	1.11025	1.17766	1.16759	0.749515	0.959848	1.13355	0.782322	0.737308	0.984212	1.05779	1.19135
499	Smar_temp_007628:	2386	0	356	741	433	856	81	57	0	0	371	116	127	128	0	45	0	223	168	206	79	0	269	138	121	111	0	0	145	0	0	0.882282	1.16892	0.944426	1.09443	0.838848	0.951863	1.03081	1.22281	0.933419	1.24819	0.847194	0.908248	0.7749	1.08148	0.8691	1.20808
500	Smar_temp_011354:	2929	0	412	1018	450	1049	74	56	0	0	475	138	128	166	0	59	0	284	192	240	58	0	452	159	153	142	0	0	152	0	0	0.884703	1.2775	0.818406	1.06848	0.778959	1.06137	1.07035	0.9163	0.943137	1.11038	1.01807	0.935246	0.658275	1.19133	0.962354	1.26433
501	Smar_temp_004454:	6631	0	1182	2157	1265	2027	228	274	0	0	851	219	358	424	0	208	0	631	405	484	288	0	769	480	399	287	0	0	325	0	0	1.21513	1.09599	0.870004	1.03773	0.956984	1.0304	0.944785	1.27721	0.840462	1.2484	0.987205	0.606111	0.734041	1.04735	0.794309	1.37341
502	Smar_temp_013045:	4809	0	803	1495	863	1648	181	299	0	0	801	175	190	297	0	138	0	458	193	381	171	0	625	191	221	273	0	0	214	0	0	2.07491	1.34478	0.708201	0.8853	0.893968	1.10703	1.16872	1.18666	0.723603	0.765123	1.02921	0.635946	0.743672	0.652596	0.992075	1.41832
503	Smar_temp_002692:	3562	20	580	1016	714	1232	153	164	0	1	570	151	161	203	19	110	1	294	236	238	141	0	419	155	142	187	0	0	216	0	0	1.41062	1.44584	0.790547	0.858342	0.836637	0.996777	1.06903	1.21279	0.874659	0.936923	1.16474	0.752718	0.677277	0.955646	0.932174	1.33766
504	Smar_temp_004570:	4377	0	607	1539	667	1564	105	61	0	0	653	169	212	219	0	88	0	512	289	410	113	0	620	289	194	212	0	0	230	0	0	0.659465	1.14575	0.903957	0.908973	0.931046	0.933805	1.03303	1.22163	0.965032	1.35409	1.0454	0.77918	0.745564	1.21258	0.977433	1.16847
505	Smar_temp_001111:	284	0	44	103	57	80	14	5	0	0	24	8	19	20	0	9	0	31	18	25	6	0	36	22	16	13	0	0	17	0	0	0.566188	0.96371	0.919094	1.00265	1.06845	0.967467	1.22376	0.679426	1.05877	1.37864	1.32025	0.645455	0.86165	1.12105	1.04886	1.065
506	Smar_temp_000900:	5017	0	871	1735	746	1665	147	108	0	0	637	243	209	222	0	165	0	544	282	443	136	0	715	355	267	302	0	0	241	0	0	0.833894	1.19166	0.810125	0.886416	0.944777	0.860516	1.32521	1.05009	0.973438	1.17857	1.09117	0.840655	0.769368	1.13904	1.04477	1.1528
507	Smar_temp_006121:	10466	0	2279	2876	2260	3051	458	538	0	0	1127	526	581	633	0	515	0	779	683	581	550	0	962	699	554	660	0	0	619	0	0	1.09323	1.21725	0.935534	0.884621	0.929153	1.01927	0.938489	1.11761	0.939552	1.11616	1.03777	0.791735	0.692988	1.03669	0.993432	1.26713
508	Smar_temp_012517:	4365	0	828	1358	810	1369	160	193	0	0	534	190	185	260	0	164	0	420	272	294	165	0	522	281	230	269	0	0	225	0	0	1.25611	1.23554	0.734127	0.892857	0.986121	1.03175	1.06447	1.07387	0.885683	1.09084	1.04416	0.731651	0.690285	1.07069	1.03586	1.24371
509	Smar_temp_000907:	5421	0	829	1699	1200	1693	256	223	0	0	636	211	292	378	0	130	0	500	429	400	220	0	655	265	251	228	0	0	346	0	0	1.2152	1.23008	0.776404	0.966062	0.942321	1.00507	0.963733	1.19885	0.923246	1.01995	1.02545	0.814986	0.753857	1.14472	0.880649	1.20288
510	Smar_temp_012083:	1974	0	300	685	319	670	64	40	0	0	282	80	88	105	0	52	0	208	127	179	50	0	272	128	116	82	0	0	100	0	0	0.825078	1.14429	0.794966	1.11428	0.894633	0.948539	1.2415	1.03135	0.923595	1.22955	1.14053	0.785672	0.769901	1.17297	0.805313	1.24007
511	Smar_temp_012249:	3389	2695	78	161	156	299	47	15	0	0	166	27	35	40	2694	10	1	57	59	37	20	0	56	26	12	36	0	0	49	1	0	4.17776	7.32163	4.72269	3.23841	4.01282	5.39736	6.54516	5.57035	3.56018	7.01656	5.57035	3.92346	2.60481	4.28675	5.23128	6.2927
512	Smar_temp_000094:	2005	0	301	765	356	583	83	21	0	0	205	83	118	113	0	54	0	211	134	159	75	0	349	143	87	85	0	0	84	0	0	0.392932	1.19569	0.86873	0.75754	0.948564	0.83192	1.31308	1.40333	0.811475	1.24515	1.19502	0.948325	0.714795	1.2945	0.971177	1.20929
513	Smar_temp_001621:	3404	0	639	1020	791	954	169	95	0	0	330	164	277	253	0	144	0	263	250	193	172	0	337	236	142	181	0	0	197	0	0	0.639788	1.1026	1.16867	0.741612	0.920019	1.06742	0.91944	1.15835	0.88865	1.23254	1.20047	0.915765	0.675147	1.12773	1.01069	1.23426
514	Smar_temp_001152:	1634	0	271	478	316	569	65	40	0	0	234	74	90	81	0	46	0	157	121	135	66	0	150	111	80	79	0	0	104	0	0	0.76323	1.07272	0.973598	1.00912	0.943217	0.876238	1.06363	1.25933	0.945118	1.40016	1.02346	0.784156	0.811046	1.09961	0.837139	1.18098
515	Smar_temp_009609:	16971	0	2788	5502	3042	5639	564	624	0	0	2418	691	731	963	0	492	0	1652	1122	1241	637	0	2317	981	802	857	0	0	878	0	0	1.24865	1.29895	0.741216	0.887296	0.903639	0.976459	1.03435	1.27466	0.868642	1.08533	1.0742	0.745917	0.678823	1.11004	0.92511	1.2905
516	Smar_temp_012351:	7011	0	1021	2212	1351	2427	263	267	0	0	1040	258	345	459	0	175	0	722	476	579	222	0	852	321	292	332	0	0	407	0	0	1.35709	1.22081	0.809391	0.906467	0.942893	1.07684	1.01024	1.12837	0.87026	0.996493	1.17697	0.729969	0.756142	1.0178	0.939339	1.23787
517	Smar_temp_008887:	621	0	117	220	121	163	28	36	0	0	52	23	27	39	0	23	0	57	29	56	23	0	90	35	45	26	0	0	31	0	0	1.57915	1.15475	0.629865	1.08566	0.987089	0.909805	1.18762	1.0089	0.976069	0.844406	1.04339	0.748938	0.969771	0.913096	0.846626	1.2154
518	Smar_temp_008928:	3250	0	530	1092	529	1099	76	58	0	0	441	157	165	183	0	95	0	326	230	265	95	0	423	220	177	163	0	0	175	0	0	0.672326	1.15286	0.928301	0.993935	0.882837	1.02957	0.882644	1.10122	0.978291	1.2354	1.09915	0.876011	0.717644	1.28575	0.909489	1.18666
519	Smar_temp_007121:	591	0	142	151	139	159	22	38	0	0	52	31	34	45	0	34	0	36	45	21	32	0	45	39	35	41	0	0	40	0	0	1.13781	1.1664	0.957359	0.964695	0.886168	1.26709	0.672947	0.958152	1.06963	1.07495	0.996528	0.811454	0.516931	1.20334	1.07321	1.21562
520	Smar_temp_008006:	807	0	126	254	160	267	33	26	0	0	98	34	37	57	0	13	0	89	64	64	23	0	79	53	49	41	0	0	46	0	0	1.04077	0.988173	0.734719	1.23556	1.05906	1.13187	1.04027	0.920685	0.868961	1.33643	0.660809	0.815588	0.761568	1.20899	0.983503	1.10937
521	Smar_temp_001412:	2980	0	374	993	544	1069	125	94	0	0	464	103	123	168	0	50	0	334	202	274	82	0	423	127	113	129	0	0	168	0	0	1.37681	1.27837	0.678537	0.906721	0.937639	0.926782	1.25872	1.20105	0.860893	1.01906	1.06523	0.767722	0.769201	1.03512	0.961516	1.20998
522	Smar_temp_006603:	2279	0	307	786	370	816	70	42	0	0	344	74	109	120	0	48	0	284	149	220	66	0	302	143	90	103	0	0	114	0	0	0.842662	1.11405	0.854174	0.850014	1.00914	0.940375	1.1653	1.32418	0.860513	1.35058	1.16067	0.673205	0.781726	1.12471	0.937029	1.1774
523	Smar_temp_011833:	45056	0	6847	13865	8685	15659	1814	1138	0	0	6696	2064	2401	2579	0	1220	0	4244	3331	3545	1637	0	5316	2425	1903	2087	0	0	2655	0	0	0.862233	1.24594	0.89837	0.903174	0.880733	0.964971	1.08355	1.24031	0.879596	1.15092	1.1725	0.867357	0.735673	1.10355	0.877022	1.23038
524	Smar_temp_004198:	3863	0	647	1364	586	1266	85	106	0	0	501	172	172	207	0	124	0	399	223	336	100	0	575	245	217	206	0	0	194	0	0	1.08001	1.19389	0.831268	0.949874	0.892585	1.00042	0.956199	1.01888	1.01017	1.07244	1.14429	0.811176	0.75165	1.16118	0.971525	1.20752
525	Smar_temp_001159:	3864	20	573	1352	760	1159	171	75	0	0	459	164	243	260	19	87	0	336	271	282	129	1	562	247	209	147	0	0	200	0	1	0.665473	1.18801	0.913804	1.04244	0.828545	0.977733	1.14395	1.14461	0.877344	1.23198	1.02388	0.954208	0.695386	1.1888	0.855296	1.32033
526	Smar_temp_000063:	1403	0	284	439	250	430	51	29	0	0	160	81	81	74	0	56	0	112	89	91	48	0	155	118	90	90	0	0	77	0	0	0.573056	1.12839	1.03547	1.01279	0.83242	0.945986	1.14485	0.948507	1.00494	1.32787	0.974112	0.930585	0.676342	1.16155	1.03398	1.21406
527	Smar_temp_008973:	7621	0	1409	2483	1380	2349	265	259	0	0	898	353	399	446	0	297	0	703	457	580	274	0	957	500	424	414	0	0	394	0	0	1.01513	1.18296	0.88742	0.923613	0.91856	0.991953	1.06047	1.07392	0.926288	1.08917	1.14011	0.812817	0.757845	1.0744	0.953275	1.24029
528	Smar_temp_001262:	5809	0	876	1997	980	1956	196	203	0	0	921	175	262	370	0	149	0	613	318	449	167	0	830	348	292	268	0	0	247	0	0	1.37362	1.20899	0.777676	0.969621	0.911622	1.09824	1.18551	1.13002	0.74852	1.15558	1.12792	0.593289	0.66773	0.963682	0.90858	1.39837
529	Smar_temp_006693:	510	0	75	169	110	156	20	8	0	0	59	25	33	47	0	12	0	46	49	30	17	0	61	30	28	18	0	0	26	0	0	0.494545	1.08925	0.905325	1.12663	0.88985	1.2894	0.842975	1.05091	0.772727	1.2071	1.088	1.08974	0.580337	1.45629	0.784615	1.23644
530	Smar_temp_001444:	1588	0	254	589	276	469	44	46	0	0	168	47	71	104	0	38	0	188	115	132	61	0	230	123	100	54	0	0	66	0	0	1.04199	1.0528	0.693561	1.06145	1.08074	1.01592	0.917244	1.38178	0.809678	1.30559	0.935334	0.62653	0.758816	1.4108	0.719843	1.21287
531	Smar_temp_002320:	6800	0	1110	2352	1172	2166	213	187	0	0	836	260	373	395	0	208	0	722	399	586	216	0	915	455	341	345	0	0	348	0	0	0.977462	1.12475	0.920138	0.888184	0.963719	0.974409	1.05447	1.12905	0.932185	1.18511	1.14796	0.735361	0.782187	1.0688	0.975768	1.21171
532	Smar_temp_001611:	1182	0	230	378	264	310	55	25	0	0	69	74	87	96	0	50	0	91	97	76	36	0	124	81	76	68	0	0	76	0	0	0.48666	1.02578	1.03048	1.03326	0.917921	1.13709	0.932765	0.700791	1.09765	1.10124	1.1172	1.22676	0.766615	1.40095	1.12729	0.848678
533	Smar_temp_011816:	1079	0	189	362	162	366	17	41	0	0	165	51	56	65	0	30	0	101	48	87	31	0	142	67	62	66	0	0	49	0	0	1.44487	1.16921	1.03035	0.977784	0.822533	1.19595	0.698941	1.09246	0.891705	1.05664	0.90619	0.795516	0.708518	0.873507	1.02949	1.32906
534	Smar_temp_009102:	11943	20	2192	3953	2021	3757	371	337	0	0	1496	544	629	616	19	454	1	1123	684	904	440	0	1575	857	625	672	0	0	594	1	0	0.908524	1.20376	0.94031	0.861442	0.903078	0.920876	1.08481	1.1862	0.934313	1.18121	1.12847	0.788916	0.726966	1.07588	0.974543	1.26579
535	Smar_temp_010652:	10186	0	1688	3363	1647	3488	350	260	0	0	1436	458	427	420	0	303	0	1067	610	863	351	0	1413	667	455	579	0	0	526	0	0	0.952601	1.2726	0.785256	0.816424	0.926541	0.772383	1.31427	1.28601	0.932651	1.19682	1.08318	0.792356	0.749396	1.08159	1.00169	1.20228
536	Smar_temp_010601:	16388	0	2980	5601	2501	5306	414	384	0	0	2114	844	764	796	0	613	0	1597	939	1308	540	0	2357	1139	882	945	0	0	751	0	0	0.844359	1.23127	0.893799	0.86599	0.880639	0.931236	1.08467	1.18738	0.927438	1.11832	1.13124	0.874752	0.721275	1.15961	0.979432	1.23054
537	Smar_temp_011753:	9031	20	1338	3135	1476	3062	273	275	0	1	1294	353	414	497	19	197	0	953	514	787	245	0	1338	513	428	467	0	0	461	0	1	1.25755	1.22947	0.808002	0.92148	0.896574	0.969992	1.13169	1.12036	0.921182	1.10448	0.993779	0.778125	0.740402	1.02709	1.02942	1.24641
538	Smar_temp_008915:	893	0	168	322	136	267	17	31	0	0	94	35	42	52	0	36	0	100	46	66	29	0	137	66	42	61	0	0	38	0	0	1.21162	1.17994	0.856458	0.693323	1.03869	1.06038	0.820772	1.13345	0.934512	1.08951	1.13903	0.696785	0.685533	1.13125	1.2144	1.17749
539	Smar_temp_003865:	6455	0	1099	2087	1199	2070	238	198	0	0	831	265	305	362	0	231	0	611	458	447	236	0	872	405	298	334	0	0	363	0	0	0.969939	1.29231	0.786782	0.838672	0.912945	0.93382	1.06865	1.15609	0.94409	1.13981	1.23456	0.751924	0.667899	1.19117	0.947708	1.25186
540	Smar_temp_004886:	1026	0	166	364	177	319	32	33	0	0	128	46	48	57	0	31	0	99	64	78	42	0	173	56	44	48	0	0	46	0	0	1.15234	1.33965	0.764388	0.74712	0.874763	0.907711	1.04797	1.46661	0.835875	0.95088	1.15423	0.891264	0.689207	1.16296	0.930015	1.29055
541	Smar_temp_011081:	1690	0	292	488	340	570	85	53	0	0	220	81	81	72	0	49	0	152	121	134	66	0	172	109	82	95	0	0	117	0	0	0.902196	1.22061	0.825036	0.972519	0.923497	0.733365	1.24265	1.12349	1.02028	1.29274	0.971219	0.822459	0.814136	1.05516	0.964612	1.14435
542	Smar_temp_000076:	306	0	78	71	84	73	16	28	0	0	23	13	18	22	0	18	0	18	22	9	26	0	20	19	15	19	0	0	19	0	0	1.30769	1.21404	0.923541	0.828819	1.0627	1.12877	0.693878	1.21429	0.948141	1.04984	0.905325	0.69863	0.531352	1.09785	1.02107	1.3207
543	Smar_temp_001419:	14274	0	2719	4453	2620	4482	487	791	0	0	1804	614	549	809	0	486	0	1313	793	999	572	0	1816	828	775	886	0	0	751	0	0	1.58494	1.30724	0.671683	0.913662	0.939044	0.989784	1.01268	1.14612	0.912877	0.976145	0.938347	0.719172	0.714474	0.963931	1.03776	1.28185
544	Smar_temp_006305:	1969	0	323	565	627	454	243	114	0	0	148	53	149	164	0	37	0	152	121	115	119	0	168	118	96	70	0	0	101	0	0	1.10836	1.03623	0.828163	1.03578	1.16677	0.911535	1.21707	1.15697	0.698624	1.27314	0.698301	0.711645	0.882753	0.836966	0.939908	1.41383
545	Smar_temp_012183:	7674	20	1365	2183	1633	2473	362	491	0	0	1113	249	327	519	19	231	0	691	453	473	331	0	796	394	369	434	0	1	419	1	0	1.69038	1.28182	0.70393	0.950302	0.98225	1.11725	1.04174	1.13954	0.796206	1.01469	0.951412	0.566062	0.672365	0.860815	0.986631	1.39659
546	Smar_temp_011549:	776	0	117	282	152	225	35	25	0	0	78	33	39	54	0	16	0	71	53	57	20	0	127	43	44	37	0	0	43	0	0	1.09087	1.23927	0.706047	1.03485	0.868337	0.977604	1.17555	0.872695	0.975673	1.01134	0.907006	0.972764	0.697116	1.20257	1.09067	1.19561
547	Smar_temp_003747:	1933	0	298	632	347	656	61	46	0	0	266	89	107	117	0	49	0	201	133	168	69	0	232	114	91	89	0	0	100	0	0	0.859892	1.12276	0.943125	0.933985	0.937145	1.03127	0.979271	1.28984	0.849178	1.17005	1.06658	0.880039	0.783286	1.12941	0.880039	1.19483
548	Smar_temp_009775:	3335	0	480	1153	478	1224	94	55	0	0	489	164	117	133	0	68	0	410	212	361	89	0	466	193	160	162	0	0	161	0	0	0.799446	1.16902	0.707986	0.964151	0.968878	0.804804	1.37204	1.29365	0.917725	1.16301	0.984288	0.93093	0.853085	1.20843	0.919577	1.08853
549	Smar_temp_010433:	2360	20	472	719	504	645	115	131	0	1	230	89	122	152	19	109	0	182	136	139	94	0	284	143	130	139	0	0	143	0	1	1.2996	1.2965	0.794534	0.904033	0.926179	0.989911	1.06844	0.93254	1.03814	0.994437	1.15466	0.689922	0.707356	0.987326	1.07752	1.30473
550	Smar_temp_003972:	3686	0	576	1191	689	1230	115	102	0	0	515	163	226	240	0	78	0	356	246	295	137	0	422	233	187	174	0	0	196	0	0	0.947357	1.09659	1.01516	1.00476	0.895753	1.07804	0.892924	1.27243	0.852486	1.25192	0.866573	0.848038	0.742268	1.06996	0.905268	1.25474
551	Smar_temp_004998:	18665	583	3056	6267	2900	5859	512	319	0	0	2271	849	974	940	582	622	0	1814	1093	1529	521	0	2532	1266	947	966	1	1	925	0	0	0.671842	1.2033	1.0003	0.922922	0.922109	0.96538	1.13632	1.09727	1.01613	1.23381	1.24312	0.885032	0.777235	1.20068	1.007	1.2348
552	Smar_temp_008506:	14953	0	2319	4757	2813	5064	556	513	0	0	2166	610	799	902	0	396	0	1421	945	1147	488	0	1907	800	629	806	0	0	867	0	0	1.17591	1.26012	0.892837	0.8526	0.882055	1.00793	1.05066	1.11861	0.910089	1.08439	1.10109	0.776719	0.711975	0.991966	1.02629	1.26299
553	Smar_temp_006694:	765	0	124	247	151	243	23	19	0	0	85	37	42	58	0	15	0	77	67	51	26	0	84	53	43	40	0	0	44	0	0	0.776276	1.05329	0.861463	1.07402	0.981407	1.18964	0.771677	1.06227	0.917341	1.32379	0.746293	0.939367	0.650022	1.39686	1.01553	1.1012
554	Smar_temp_000796:	1604	0	276	550	276	502	51	38	0	0	194	69	89	99	0	68	0	153	98	129	40	0	220	101	87	81	0	0	86	0	0	0.800147	1.16655	0.940422	0.919289	0.888852	1.04609	1.07388	0.84226	0.995612	1.06722	1.43184	0.798805	0.749424	1.13453	0.937727	1.23481
555	Smar_temp_003961:	14416	0	2008	4774	2501	5133	436	335	0	0	2229	606	766	837	0	310	0	1489	964	1283	419	0	1896	757	623	656	0	0	809	0	0	0.961639	1.19927	0.924863	0.936886	0.875963	1.01059	1.00486	1.20277	0.908465	1.1384	1.10836	0.847583	0.754775	1.08252	0.917516	1.21959
556	Smar_temp_003694:	847	0	139	265	193	250	40	51	0	0	98	32	44	66	0	19	0	77	57	50	44	0	112	37	31	45	0	0	43	0	0	1.61021	1.35086	0.728673	0.712827	0.984438	1.09301	0.909555	1.3892	0.754839	0.850794	0.832928	0.779971	0.639245	1.0006	1.09683	1.3281
557	Smar_temp_001868:	3243	0	514	1079	544	1106	95	78	0	0	452	131	156	159	0	98	0	338	215	303	105	0	410	207	174	136	0	0	185	0	0	0.904648	1.14206	0.861889	1.01745	0.918517	0.878464	1.04105	1.2178	0.99716	1.21041	1.20295	0.747309	0.823404	1.15886	0.775832	1.19833
558	Smar_temp_003426:	3217	0	561	1046	589	1021	115	72	0	0	376	151	161	172	0	92	0	308	241	242	116	0	385	246	191	162	0	0	186	0	0	0.70098	1.13201	0.840679	1.0471	0.927779	0.898116	1.0664	1.12936	0.995	1.34863	0.940401	0.848085	0.728969	1.28922	0.909866	1.16035
559	Smar_temp_008947:	1823	0	311	566	361	585	63	53	0	0	230	68	96	107	0	65	0	165	149	112	69	0	222	125	83	94	0	0	121	0	0	0.860587	1.2633	0.856514	0.859583	0.908444	0.954656	0.881278	1.12039	1.0445	1.29455	1.22512	0.681364	0.616641	1.2862	0.941886	1.22519
560	Smar_temp_013206:	3365	0	500	1144	557	1164	90	76	0	0	462	141	161	163	0	82	0	364	230	318	107	0	461	201	157	154	0	0	197	0	0	0.918276	1.18532	0.850217	0.92361	0.91983	0.860779	0.976151	1.29284	1.02245	1.18246	1.10372	0.815232	0.803588	1.19373	0.890395	1.14742
561	Smar_temp_000042:	2369	0	431	774	443	721	81	58	0	0	237	138	131	138	0	68	0	211	173	192	90	0	277	167	154	119	0	0	134	0	0	0.719635	1.09538	0.90509	1.09362	0.895718	0.953453	0.977783	1.11667	0.993873	1.18594	0.8672	1.05204	0.815061	1.28313	0.907193	1.08005
562	Smar_temp_007074:	14650	20	2679	4055	3020	4876	668	633	0	0	2060	721	674	889	19	523	1	1243	1045	895	610	0	1467	802	671	875	0	0	852	1	0	1.1462	1.30703	0.806306	0.904892	0.920988	1.06351	1.073	1.10456	0.847631	1.08155	1.06756	0.808605	0.663141	1.03964	0.981317	1.26934
563	Smar_temp_007736:	2183	0	383	724	375	701	69	94	0	0	269	97	77	118	0	61	0	229	134	180	82	0	295	131	122	118	0	0	106	0	0	1.42873	1.22857	0.61912	0.960453	0.984992	0.948781	1.07113	1.24634	0.880259	1.03131	0.907791	0.788694	0.774229	1.11278	0.959442	1.19501
564	Smar_temp_001809:	1248	0	196	416	214	422	43	42	0	0	170	62	53	72	0	28	0	125	76	115	34	0	165	64	73	60	0	0	65	0	0	1.24967	1.1899	0.742991	1.11735	0.888626	1.00935	1.17181	1.01163	0.898259	0.979592	0.909621	0.935487	0.817536	1.05027	0.90531	1.19135
565	Smar_temp_009134:	4031	0	572	1292	613	1554	101	116	0	0	749	191	181	193	0	63	0	409	215	394	114	0	502	202	199	196	0	0	205	0	0	1.33357	1.21225	0.921231	1.08544	0.82115	0.982307	1.08346	1.31057	0.867471	1.10181	0.776178	0.866162	0.791035	0.909787	0.888836	1.25024
566	Smar_temp_001276:	6229	0	893	2075	1055	2206	219	166	0	0	946	259	296	336	0	139	0	705	374	593	204	0	817	329	257	292	0	0	296	0	0	1.09755	1.18196	0.842247	0.863937	0.959365	0.956064	1.22562	1.34879	0.792231	1.10597	1.08575	0.818957	0.806955	1.001	0.923303	1.21087
567	Smar_temp_005000:	1485	0	206	460	288	531	54	36	0	0	210	51	79	72	0	31	0	159	119	141	51	0	158	88	63	61	0	0	111	0	0	0.901092	1.10884	0.88553	0.987284	0.966654	0.807065	0.966797	1.27655	1.07786	1.37906	1.08481	0.692365	0.857222	1.15554	0.828122	1.106
568	Smar_temp_010005:	12768	779	1743	4068	1963	4215	371	344	1	2	1907	495	535	683	775	243	2	1247	710	1013	344	0	1712	660	573	583	2	1	564	0	0	1.2837	1.32088	0.855412	1.03181	0.928562	1.09205	1.2293	1.2837	0.87033	1.18847	1.02126	0.860267	0.754317	1.09563	1.0132	1.3705
569	Smar_temp_007531:	1746	0	544	384	488	330	122	224	0	0	76	90	54	128	0	122	0	80	88	31	154	0	116	108	133	135	0	0	84	0	0	1.47324	1.37354	0.503138	1.11164	1.10227	1.19262	0.894467	1.01285	0.91073	0.902688	0.719791	0.875334	0.427131	0.954098	1.313	1.21851
570	Smar_temp_000256:	893	0	186	260	178	269	38	45	0	0	95	40	41	59	0	37	0	77	54	59	24	0	78	64	64	61	0	0	56	0	0	1.21375	1.03038	0.791119	1.1818	0.983143	1.13844	1.07101	0.647336	1.0444	1.1818	0.955053	0.713915	0.753317	1.0071	1.08872	1.17239
571	Smar_temp_005469:	1762	0	205	609	293	655	44	30	0	0	286	68	85	106	0	17	0	205	134	169	46	0	243	90	76	66	0	0	96	0	0	0.880047	1.15446	0.839344	1.07263	0.905527	1.04671	0.903074	1.3494	0.88139	1.27022	0.712766	0.892318	0.746507	1.23027	0.866073	1.1746
572	Smar_temp_000226:	1501	0	261	515	210	515	35	26	0	0	223	81	60	70	0	59	0	152	89	136	46	0	215	94	88	67	0	0	59	0	0	0.712023	1.21676	0.832732	0.982688	0.860221	0.971521	1.19127	1.25973	0.818853	1.04969	1.30002	0.90452	0.769671	1.23522	0.748183	1.26203
573	Smar_temp_001821:	2412	0	333	860	390	829	69	56	0	0	332	97	114	144	0	50	0	281	150	233	58	0	353	130	111	114	0	0	119	0	0	1.04006	1.15121	0.819821	0.934884	0.950672	1.03556	1.0942	1.0772	0.88778	1.09491	1.08757	0.847521	0.78828	1.11905	0.996055	1.16522
574	Smar_temp_004534:	2194	0	341	761	480	612	98	63	0	0	208	82	152	211	0	51	0	210	167	145	59	0	259	145	139	92	0	0	112	0	0	0.844465	0.981222	0.912965	1.1752	0.989281	1.26734	0.933212	0.790848	0.836492	1.22593	0.962272	0.862074	0.683075	1.24727	0.967205	1.21842
575	Smar_temp_007641:	2474	0	409	846	511	708	111	99	0	0	271	96	145	194	0	63	0	220	156	173	85	0	328	151	152	108	0	0	121	0	0	1.1719	1.13379	0.829806	1.0868	0.908696	1.11022	1.05167	1.00618	0.827429	1.07965	0.931738	0.82019	0.714566	1.06677	0.922714	1.33753
576	Smar_temp_008824:	4958	0	747	1579	869	1763	179	172	0	0	776	179	200	272	0	126	0	521	317	383	131	0	654	270	203	287	0	0	287	0	0	1.3137	1.30053	0.722661	0.853296	0.927918	0.982819	1.17522	1.00055	0.928787	1.13493	1.11953	0.673886	0.682136	1.02587	1.08048	1.23784
577	Smar_temp_001943:	3646	0	478	1265	538	1365	81	75	0	0	648	108	124	211	0	61	0	455	258	277	93	0	543	234	142	182	0	0	153	0	0	1.06333	1.23719	0.664302	0.856222	0.960738	1.13038	1.02032	1.31853	0.759614	1.41096	0.973399	0.603504	0.584889	1.28092	1.01702	1.26802
578	Smar_temp_004932:	1495	0	196	586	227	486	33	22	0	0	200	44	99	88	0	18	0	173	73	156	37	0	230	112	83	57	0	0	69	0	0	0.739234	1.00132	1.11264	1.08035	0.908141	0.989009	0.957422	1.24326	0.935036	1.45783	0.700489	0.69056	0.818902	0.989241	0.894589	1.2659
579	Smar_temp_004958:	9837	20	1781	3345	1588	3103	267	228	1	1	1218	493	485	503	19	334	0	937	608	705	363	0	1412	725	511	572	0	0	454	0	0	0.793018	1.24138	0.898168	0.843769	0.888023	0.931503	1.04153	1.26257	0.90633	1.19713	1.03581	0.877534	0.66815	1.21376	1.01815	1.24436
580	Smar_temp_002307:	1325	0	194	431	386	314	105	96	0	0	111	22	91	155	0	31	0	113	94	43	58	0	187	45	39	66	0	0	68	0	0	1.69863	1.33384	0.724757	0.618019	1.10634	1.23448	0.93375	1.02625	0.743375	0.713098	1.09138	0.478528	0.420995	1.02761	1.43558	1.49169
581	Smar_temp_004472:	13578	0	2200	4321	2391	4666	436	254	0	0	1814	680	720	830	0	410	0	1374	981	1081	328	0	1555	855	672	790	0	0	797	0	0	0.655643	1.13083	0.946247	0.959838	0.925323	1.09081	1.03553	0.846657	0.969996	1.22122	1.1502	0.899451	0.728002	1.19393	1.04495	1.13132
582	Smar_temp_008646:	3634	0	544	1105	748	1237	170	97	0	0	544	158	231	260	0	103	0	336	250	275	118	0	383	186	155	168	0	0	199	0	0	0.866276	1.13988	1.01562	0.937034	0.893289	1.14313	1.10416	1.05382	0.781568	1.12444	1.26481	0.853244	0.731115	0.981869	0.907247	1.29195
583	Smar_temp_002854:	1966	0	311	659	397	599	62	85	0	0	251	68	120	154	0	49	0	179	129	128	80	0	268	109	91	91	0	0	101	0	0	1.35348	1.21324	0.901756	0.872929	0.891506	1.15725	0.773382	1.27386	0.835002	1.0456	0.995999	0.717638	0.637502	1.06649	0.960368	1.37532
584	Smar_temp_007769:	7344	0	1050	2237	1325	2732	262	240	0	0	1296	263	291	418	0	160	0	784	532	559	256	0	872	387	289	345	0	0	389	0	0	1.26689	1.27973	0.721014	0.903598	0.942111	1.03568	1.09598	1.35135	0.789197	1.21001	1.0658	0.673315	0.671735	1.07931	0.883246	1.27519
585	Smar_temp_003241:	9657	41	1608	3259	1658	3091	293	282	1	0	1237	388	469	560	38	343	0	951	614	738	291	0	1364	594	473	501	0	0	514	3	2	1.02146	1.24019	0.838197	0.871632	0.911674	1.00083	1.0293	1.05406	0.968549	1.09461	1.28104	0.753857	0.707482	1.15698	0.973408	1.2503
586	Smar_temp_009531:	3437	0	581	1134	584	1138	132	112	0	0	482	137	164	178	0	100	0	367	176	285	122	0	438	232	164	195	0	0	152	0	0	1.13451	1.17065	0.851133	0.855528	0.97744	0.923791	1.33023	1.23581	0.786082	1.21026	1.01819	0.712167	0.759048	0.910201	1.01367	1.27921
587	Smar_temp_011300:	12644	373	2097	3911	2180	4083	470	476	1	4	1864	483	515	739	368	441	3	1136	719	801	375	1	1674	696	585	695	0	0	596	0	1	1.31655	1.38377	0.763743	0.901891	0.899489	1.09593	1.25046	1.0372	0.846632	1.07302	1.26802	0.71327	0.634234	1.02136	1.02634	1.41375
588	Smar_temp_005891:	345	0	22	110	131	82	59	10	0	0	23	1	31	43	0	0	0	38	31	28	9	0	27	11	13	0	0	0	20	0	0	1.19709	0.769835	0.742193	1.85331	1.45344	1.02949	1.18612	1.07738	0.642338	1.56818	0	0.191242	1.07095	0.995625	0	1.1801
589	Smar_temp_012828:	7470	0	1207	2477	1276	2510	222	233	0	0	1017	326	342	420	0	222	0	769	479	646	237	0	985	426	380	368	0	0	397	0	0	1.1301	1.19924	0.808295	0.949447	0.923947	0.992643	1.01853	1.14951	0.925948	1.06438	1.13831	0.803817	0.776164	1.1172	0.907376	1.20585
590	Smar_temp_007872:	360	0	62	102	93	103	16	34	0	0	30	5	15	25	0	10	0	25	28	16	9	0	47	13	14	29	0	0	43	0	0	2.12279	1.6263	0.56926	0.796964	0.856653	0.948767	0.665973	0.561915	1.61604	0.740038	0.936524	0.281867	0.548258	1.0523	1.63483	1.018
591	Smar_temp_003968:	10358	0	1554	3510	1667	3627	245	237	0	0	1534	465	517	591	0	231	0	1095	668	923	298	0	1374	621	523	502	0	0	533	0	0	0.947627	1.15518	0.915216	0.993161	0.890913	1.04621	0.91321	1.19153	0.913103	1.17926	0.9908	0.854536	0.750971	1.14438	0.922531	1.20783
592	Smar_temp_012721:	480	0	100	181	105	94	18	31	0	0	27	12	29	41	0	17	0	37	27	16	27	0	83	40	32	24	0	0	18	0	0	1.41714	1.21608	0.732439	0.848619	1.04385	1.03552	0.783673	1.23429	0.87538	1.06077	0.816	0.612766	0.451393	1.31307	1.22553	1.46673
593	Smar_temp_001391:	246	0	55	71	68	52	12	11	0	0	10	7	24	15	0	15	0	17	21	13	23	0	20	22	9	8	0	0	18	0	0	0.723529	0.975997	1.22287	0.566965	1.13272	0.764292	0.638408	1.51283	1.25226	1.38592	1.21983	0.602098	0.866197	1.46097	0.688112	0.909763
594	Smar_temp_005280:	10565	0	1854	3418	2271	3022	656	272	0	0	1123	448	673	694	0	463	0	885	670	766	355	0	1286	671	573	463	0	0	566	0	0	0.682514	1.16296	0.916	0.955306	0.905204	0.944582	1.34381	0.890781	0.871313	1.11869	1.42309	0.844779	0.783487	1.03141	0.873064	1.29915
595	Smar_temp_002439:	1331	0	344	360	330	297	81	97	0	0	85	65	71	103	0	80	0	81	81	56	80	0	98	102	109	75	0	0	66	0	0	1.13731	1.00647	0.795463	1.1715	1.00833	1.15398	0.99	0.937984	0.896296	1.09627	0.899811	0.846792	0.697119	1.1	0.977067	1.28258
596	Smar_temp_004842:	2872	0	469	950	422	1031	82	49	0	0	456	133	103	117	0	80	0	324	188	234	105	0	392	207	130	153	0	0	118	0	0	0.711042	1.24745	0.73788	0.837976	0.950052	0.838174	1.32243	1.52366	0.778924	1.33431	1.04455	0.789959	0.686148	1.241	0.90875	1.23206
597	Smar_temp_005864:	1979	0	269	674	325	711	47	29	0	0	303	88	118	118	0	37	0	214	131	183	54	0	258	115	83	94	0	0	106	0	0	0.65646	1.12395	1.06607	0.905966	0.883751	1.06607	0.880596	1.22237	0.907818	1.25525	1.01191	0.910556	0.755731	1.12193	0.972639	1.18618
598	Smar_temp_011526:	2554	0	401	841	497	815	88	86	0	0	299	105	138	170	0	50	0	257	185	196	84	0	314	160	132	135	0	0	154	0	0	1.10209	1.13386	0.843233	0.999665	0.957636	1.03877	0.909894	1.07646	0.971019	1.21172	0.794149	0.820556	0.730337	1.16648	1.055	1.14968
599	Smar_temp_007175:	1283	0	277	365	308	333	56	53	0	0	88	62	100	79	0	74	0	89	99	80	79	0	117	88	58	66	0	0	94	0	0	0.797025	1.12675	1.14126	0.736007	0.939463	0.901592	0.757379	1.18802	1.17587	1.1167	1.23737	0.862371	0.844461	1.23842	0.918008	1.01817
600	Smar_temp_010412:	6402	40	1082	1934	1205	2141	218	283	1	1	905	243	249	355	38	233	0	627	455	501	266	0	755	321	303	280	0	1	365	1	0	1.38959	1.29226	0.684024	0.926989	0.969416	0.975215	0.961165	1.30612	0.905743	0.982058	1.27414	0.671549	0.774605	1.12908	0.773802	1.26395
601	Smar_temp_006843:	4686	0	829	1237	903	1717	162	165	0	0	813	210	211	218	0	117	0	363	365	271	192	0	410	337	252	268	0	0	331	0	0	1.03287	1.25559	0.885171	1.15154	0.800883	0.914537	0.930983	1.20188	1.0004	1.53995	0.797773	0.691348	0.597904	1.10316	0.882292	1.29227
602	Smar_temp_005699:	5649	305	868	1864	1007	1605	185	259	0	1	702	151	236	400	304	149	1	505	327	313	177	0	843	308	280	262	0	0	245	0	0	1.67387	1.37059	0.710245	0.977606	0.953547	1.20381	1.03059	1.14392	0.856314	1.07537	1.11717	0.612285	0.59101	1.14292	1.06238	1.53943
603	Smar_temp_010467:	12221	0	1657	3941	2372	4251	522	267	0	0	1830	482	625	715	0	248	0	1176	958	960	371	0	1606	660	534	503	0	0	763	0	0	0.830196	1.26369	0.817082	0.999353	0.85786	0.934742	1.13383	1.15357	0.924752	1.23516	1.10386	0.836258	0.700294	1.16109	0.872692	1.23759
604	Smar_temp_001191:	10514	0	1958	3383	1726	3447	284	366	0	0	1379	521	450	525	0	401	0	997	626	786	368	0	1402	670	534	655	0	0	549	0	0	1.13866	1.28799	0.810285	0.847607	0.898918	0.945332	1.00232	1.14489	0.970193	1.06348	1.09973	0.811618	0.708675	1.10627	1.02036	1.22025
605	Smar_temp_007554:	8423	0	1208	2822	1487	2906	298	294	0	0	1325	319	391	498	0	177	0	823	504	685	252	0	1221	418	386	392	0	0	439	0	0	1.37859	1.29142	0.78483	0.95374	0.845306	0.999604	1.13517	1.18165	0.855706	1.03281	1.02166	0.765411	0.703566	0.982405	0.940568	1.32157
606	Smar_temp_006951:	1166	0	210	379	190	387	27	47	0	0	158	40	51	66	0	42	0	122	65	89	31	0	144	80	62	75	0	0	66	0	0	1.37348	1.16891	0.825802	0.908305	0.969858	1.06868	0.872078	0.905915	1.04659	1.17201	1.11048	0.57389	0.707519	1.03074	1.07604	1.23008
607	Smar_temp_010649:	2118	0	317	681	381	739	71	64	0	0	318	80	99	140	0	58	0	230	147	162	59	0	263	115	88	112	0	0	111	0	0	1.12233	1.20112	0.808145	0.863381	0.967971	1.14283	1.03594	1.03465	0.834987	1.12828	1.22246	0.72329	0.681788	1.10579	1.01261	1.23329
608	Smar_temp_000124:	9739	0	1561	3363	1585	3230	284	324	0	0	1485	311	449	516	0	302	0	958	528	796	309	0	1427	624	528	421	0	0	476	0	0	1.27534	1.22881	0.82036	0.979532	0.858916	0.942775	1.10097	1.2163	0.905502	1.15763	1.20702	0.600716	0.713671	1.00442	0.813188	1.38623
609	Smar_temp_005056:	376	0	64	120	56	136	8	9	0	0	50	18	12	11	0	10	0	42	27	35	11	0	46	27	19	24	0	0	26	0	0	0.944196	1.20111	0.671429	0.930208	0.967647	0.615476	0.959184	1.15402	1.28361	1.32187	0.917969	0.777574	0.806373	1.33298	1.03676	1.01644
610	Smar_temp_008724:	3614	0	567	1214	660	1173	120	114	0	0	475	155	198	228	0	95	0	337	228	282	105	0	500	203	179	188	0	0	206	0	0	1.10095	1.22609	0.893081	0.939809	0.855266	1.0284	0.995592	1.01403	0.961642	1.06582	1.06794	0.842246	0.715683	1.06434	1.02156	1.24763
611	Smar_temp_012102:	1653	0	274	523	360	496	77	99	0	0	181	45	77	148	0	56	0	171	107	101	36	0	199	74	75	107	0	0	99	0	0	1.65903	1.2026	0.67602	0.865131	1.08965	1.29936	0.982106	0.603285	0.916482	0.853596	1.23299	0.547335	0.643592	0.990541	1.30144	1.21615
612	Smar_temp_002248:	2700	0	423	920	496	861	90	59	0	0	344	106	171	199	0	63	0	280	176	194	76	0	331	195	137	147	0	0	131	0	0	0.759266	1.05588	1.01179	0.950509	0.954401	1.17746	0.987741	0.978037	0.828229	1.35291	0.950656	0.785825	0.661263	1.11273	1.08978	1.2529
613	Smar_temp_012176:	1112	0	137	412	172	391	24	16	0	0	170	38	58	66	0	12	0	131	74	94	29	0	180	71	43	53	0	0	52	0	0	0.75505	1.17919	0.910138	0.847141	0.904278	1.03567	0.902109	1.36853	0.859811	1.39877	0.71096	0.788844	0.648871	1.22358	1.10023	1.23652
614	Smar_temp_007966:	12699	0	1860	4253	2185	4401	486	364	0	0	2029	472	517	716	0	308	0	1275	818	914	357	0	1906	716	555	640	0	0	625	0	0	1.13738	1.33814	0.706502	0.890952	0.865034	0.978443	1.29272	1.11551	0.825366	1.14941	1.13056	0.732229	0.62011	1.08024	0.992854	1.3303
615	Smar_temp_002509:	5121	0	823	1603	992	1703	203	163	0	0	733	228	266	340	0	142	0	480	360	351	187	0	621	290	236	258	0	0	262	0	0	1.02242	1.2376	0.856626	0.91608	0.900426	1.09494	1.0564	1.17296	0.7942	1.12569	1.0736	0.833058	0.658436	1.09127	0.942671	1.29428
616	Smar_temp_005383:	10393	0	1652	3301	1848	3592	399	188	0	0	1546	482	527	617	0	305	0	1030	734	770	298	0	1237	677	507	541	0	0	534	0	0	0.64001	1.17983	0.897851	0.966258	0.90281	1.05118	1.21425	1.01448	0.836072	1.29025	1.1615	0.844193	0.674916	1.14921	0.947527	1.24531
617	Smar_temp_010707:	4317	0	776	1583	822	1136	176	125	0	0	356	161	287	321	0	187	0	425	234	338	131	0	620	303	250	208	0	0	194	0	0	0.845977	1.0681	0.952163	0.878576	1.02026	1.06496	1.12448	0.886584	0.896879	1.06483	1.3406	0.788439	0.811408	1.0818	1.0186	1.1909
618	Smar_temp_000623:	10915	0	1935	3425	2468	3087	523	556	0	0	1136	399	653	832	0	350	0	926	735	700	487	0	1263	630	582	516	0	0	626	0	0	1.27079	1.17518	0.843201	0.958529	0.955955	1.07434	0.937206	1.11308	0.896843	1.03758	1.0203	0.729086	0.722644	1.053	0.942879	1.30115
619	Smar_temp_005664:	1590	0	215	548	256	571	38	21	0	0	233	61	64	87	0	35	0	183	133	136	37	0	227	98	74	69	0	0	93	0	0	0.60665	1.20188	0.725365	0.998642	0.92989	0.986043	0.921936	1.06886	1.01159	1.32253	1.20389	0.790046	0.691066	1.44668	0.893659	1.13627
620	Smar_temp_008138:	7509	0	1100	2215	1531	2663	322	292	0	0	1205	263	383	466	0	179	0	718	534	555	265	0	827	366	287	369	0	0	477	0	0	1.30196	1.26573	0.848071	0.884499	0.914033	1.03186	1.03154	1.18157	0.878525	1.12797	1.11084	0.674177	0.706529	0.983506	0.945899	1.27593
621	Smar_temp_006141:	6599	0	1023	2168	1141	2267	199	171	0	0	935	299	310	386	0	169	0	681	461	549	205	0	849	384	327	322	0	0	351	0	0	0.966747	1.19198	0.82698	0.972951	0.914354	1.02972	1.0087	1.15897	0.895464	1.14255	1.06565	0.85079	0.737123	1.17609	0.916235	1.20057
622	Smar_temp_006614:	1300	0	200	428	347	325	91	57	0	0	104	35	113	105	0	26	0	110	86	82	75	0	158	82	46	53	0	0	76	0	0	1.06772	1.12128	0.989119	0.698598	1.02804	0.919093	0.982485	1.4049	0.876081	1.24533	0.845	0.7	0.766355	0.991354	1.06	1.28
623	Smar_temp_004041:	2702	0	486	887	582	747	122	57	0	0	208	149	194	214	0	101	0	238	209	187	94	0	306	179	148	143	0	0	152	0	0	0.544504	1.0509	1.01541	0.927656	0.97055	1.12009	0.973194	0.897954	0.944681	1.12196	1.1554	1.10896	0.762575	1.29894	1.0643	1.00718
624	Smar_temp_002445:	6052	0	1095	1896	1003	2058	186	190	0	0	830	335	247	285	0	189	0	569	380	481	209	0	749	381	331	366	0	0	323	0	0	1.04698	1.26097	0.786062	0.964883	0.882526	0.906994	1.11895	1.15168	0.947011	1.11064	0.953965	0.899672	0.746037	1.11413	0.982925	1.186
625	Smar_temp_012907:	8999	20	1363	2981	1721	2914	341	362	0	1	1247	314	448	637	19	231	0	878	570	643	270	0	1245	456	408	454	0	0	473	0	1	1.38876	1.26078	0.785831	0.903642	0.909572	1.11735	1.03606	1.03581	0.84876	1.00995	1.11896	0.71144	0.666122	1.02282	1.02864	1.32154
626	Smar_temp_009336:	2032	0	388	678	371	595	78	97	0	0	252	68	91	112	0	84	0	179	105	112	85	0	314	139	93	126	0	0	96	0	0	1.36927	1.38801	0.735126	0.718365	0.901634	0.90477	1.15152	1.19988	0.883698	1.07369	1.13381	0.598527	0.564151	0.966545	1.10904	1.44641
627	Smar_temp_012466:	18858	0	3295	6239	3117	6207	544	413	0	0	2487	969	924	973	0	621	0	1839	1236	1487	688	0	2486	1292	990	996	0	0	912	0	0	0.758322	1.20439	0.896016	0.908156	0.895531	0.943532	1.0559	1.26326	0.888939	1.18519	1.07864	0.893475	0.724119	1.20475	0.91837	1.21733
628	Smar_temp_008239:	6104	0	1012	1842	1190	2060	273	183	0	0	798	321	288	352	0	172	0	601	445	483	224	0	671	336	282	334	0	0	340	0	0	0.927552	1.20714	0.801993	0.923408	0.96679	0.980213	1.17675	1.13536	0.846602	1.10023	1.02514	0.939879	0.776971	1.10805	0.977942	1.14784
629	Smar_temp_005934:	10451	0	1877	3072	1946	3556	351	396	0	0	1403	489	465	566	0	367	0	1002	734	845	367	0	1036	624	569	574	0	0	662	0	0	1.13304	1.1473	0.812918	1.0313	0.958611	0.989487	0.968678	1.05007	0.999796	1.13099	1.08867	0.765668	0.80841	1.10853	0.89876	1.15956
630	Smar_temp_001016:	1575	0	181	566	270	558	46	47	0	0	229	44	74	87	0	16	0	203	103	185	55	0	219	74	69	41	0	0	82	0	0	1.51473	1.07669	0.762662	1.0608	1.01234	0.896643	0.993827	1.77256	0.857228	1.13767	0.769207	0.686152	0.922575	1.07676	0.639369	1.15837
631	Smar_temp_001206:	6828	21	1032	2325	1244	2206	219	277	0	0	998	223	356	505	19	151	0	663	391	481	198	0	956	381	347	336	0	0	322	2	2	1.47324	1.20755	0.840427	0.987462	0.88263	1.19218	0.966266	1.05307	0.801168	1.08422	0.96808	0.668826	0.640339	0.972847	1.00774	1.40027
632	Smar_temp_006450:	675	0	135	238	122	180	23	16	0	0	61	34	36	48	0	29	0	52	47	30	18	0	103	56	46	42	0	0	33	0	0	0.655738	1.2274	0.836892	0.966387	0.819328	1.11586	1.04307	0.737705	1.01434	1.17647	1.07407	0.944444	0.472689	1.44467	1.16667	1.27083
633	Smar_temp_000388:	9891	0	1476	3399	1578	3438	239	185	0	0	1396	452	417	550	0	223	0	1111	737	843	309	0	1389	616	482	462	0	0	479	0	0	0.785631	1.18916	0.768985	0.950276	0.940367	1.01425	0.949345	1.31222	0.873299	1.21446	1.01245	0.881021	0.713528	1.34368	0.900513	1.16819
634	Smar_temp_002275:	1048	0	188	349	240	271	55	46	0	0	77	51	78	89	0	31	0	86	61	77	39	0	123	60	62	56	0	0	56	0	0	1.06844	1.05832	0.975931	0.990307	0.952939	1.11356	1.00069	0.905851	0.902337	0.958361	0.919194	1.04907	0.853213	0.982903	1.15192	1.09879
635	Smar_temp_008053:	3844	0	529	1325	699	1291	107	139	0	0	561	124	195	282	0	70	0	421	258	304	125	0	543	196	165	168	0	0	185	0	0	1.44499	1.18892	0.809329	0.90489	0.94607	1.17041	0.841808	1.29945	0.788046	1.0749	0.961546	0.697948	0.683148	1.099	0.945607	1.29388
636	Smar_temp_002048:	6457	0	1167	2000	1283	2007	263	284	0	0	816	233	324	415	0	229	0	582	412	428	229	0	737	420	357	351	0	0	376	0	0	1.22476	1.1897	0.815303	0.987639	0.936217	1.04429	1.03165	0.987572	0.942854	1.16193	1.08574	0.642345	0.688489	1.03313	0.967653	1.30806
637	Smar_temp_007654:	399	0	52	162	85	100	18	2	0	0	22	6	21	18	0	17	0	30	44	27	7	0	89	27	21	7	0	0	42	0	0	0.180543	1.35311	0.608497	0.994658	0.738889	0.521569	0.994048	0.6319	1.97153	1.27885	2.50851	0.460385	0.665	2.06541	0.537115	0.8778
638	Smar_temp_010206:	5181	0	878	1633	963	1707	182	259	0	0	737	174	197	316	0	158	0	527	325	349	196	0	680	287	228	296	0	0	269	0	0	1.58706	1.32114	0.649034	0.823887	0.9795	1.04109	1.01679	1.20102	0.847825	1.03709	1.0619	0.601499	0.648663	1.02432	1.02324	1.31043
639	Smar_temp_007967:	4197	0	613	1238	795	1551	179	115	0	0	740	148	213	254	0	111	0	419	288	291	118	0	453	239	152	232	0	0	244	0	0	0.990397	1.2405	0.908303	0.840623	0.915842	1.08314	1.18866	1.01623	0.83052	1.32177	1.23977	0.653324	0.636062	0.980285	1.02413	1.29106
640	Smar_temp_009067:	25552	0	5174	8636	3911	7831	696	770	0	0	3064	1337	1160	1244	0	1132	0	2347	1285	1873	888	0	3583	1935	1546	1608	0	0	1083	0	0	0.972302	1.22757	0.877571	0.884088	0.886764	0.94112	1.16268	1.1213	0.903542	1.10654	1.08048	0.843165	0.707673	1.07207	1.01407	1.27667
641	Smar_temp_012268:	7823	20	1348	2617	1598	2240	359	362	0	0	826	294	435	529	19	225	1	723	441	570	313	0	1050	467	408	402	0	0	397	1	0	1.31467	1.19938	0.813733	0.904774	0.96485	0.989575	1.0998	1.13671	0.867639	1.03561	0.96867	0.761698	0.76067	0.9638	1.04151	1.28783
642	Smar_temp_003897:	441	0	67	128	102	144	23	13	0	0	43	25	28	32	0	9	0	43	38	40	14	0	36	20	21	22	0	0	33	0	0	0.838894	0.968994	0.945772	1.07987	1.02881	1.08088	0.974913	0.903424	0.990809	1.02845	0.884161	1.14272	0.957031	1.14093	1.0056	0.914497
643	Smar_temp_006763:	6362	0	1138	2174	1074	1976	189	153	0	0	789	319	362	344	0	228	0	567	369	481	240	0	911	438	333	337	0	0	301	0	0	0.796413	1.22629	0.986367	0.85632	0.839712	0.937321	1.04243	1.24928	0.902337	1.12633	1.12007	0.902516	0.712348	1.10619	0.953442	1.28557
644	Smar_temp_010537:	1051	0	179	329	194	349	48	48	0	0	138	33	36	54	0	42	0	119	62	79	33	0	139	56	34	70	0	0	59	0	0	1.45274	1.34966	0.592799	0.606782	1.08925	0.889199	1.34042	0.998762	0.915857	0.999406	1.37767	0.555186	0.723117	0.962426	1.17767	1.19078
645	Smar_temp_001758:	16397	136	2482	5379	2866	5534	498	406	0	1	2282	670	818	982	135	416	0	1662	1144	1295	467	0	2111	990	786	813	0	0	919	0	1	0.935863	1.19633	0.870042	0.965347	0.915492	1.04448	0.994126	1.07647	0.95009	1.2159	1.10727	0.799831	0.713335	1.1827	0.970541	1.2218
646	Smar_temp_006053:	13717	0	2359	4114	2752	4492	611	640	0	0	1958	552	634	809	0	458	0	1191	867	958	542	0	1639	708	650	709	0	0	790	0	0	1.35227	1.32834	0.768132	0.918714	0.88403	0.980155	1.10663	1.1452	0.876593	1.00069	1.12893	0.714547	0.711084	0.962033	0.917778	1.33104
647	Smar_temp_001578:	4138	0	617	1342	913	1266	245	120	0	0	436	148	261	291	0	111	0	433	287	348	128	0	464	238	183	195	0	0	249	0	0	0.881487	1.06611	0.88147	0.914543	1.05461	0.982789	1.21623	0.940253	0.891426	1.18941	1.20654	0.784031	0.847585	1.02747	1.03301	1.12567
648	Smar_temp_001073:	21770	0	3582	6695	4178	7315	866	526	0	0	2894	1009	1112	1164	0	619	0	2097	1674	1613	834	0	2490	1428	995	1134	0	0	1314	0	0	0.765156	1.20936	0.865454	0.903245	0.932163	0.905925	1.08004	1.21319	0.93599	1.29631	1.05026	0.83832	0.717014	1.19243	0.942175	1.17741
649	Smar_temp_009597:	4891	0	785	1640	863	1603	163	117	0	0	611	215	254	287	0	143	0	543	328	408	179	0	636	309	207	256	0	0	234	0	0	0.844701	1.15656	0.877762	0.78642	1.01023	0.991802	1.07044	1.29232	0.827312	1.17393	1.135	0.835666	0.759068	1.15965	0.995026	1.16298
650	Smar_temp_010584:	2113	0	274	737	380	722	83	23	0	0	314	88	125	140	0	40	0	219	149	164	56	0	309	123	83	95	0	0	101	0	0	0.46676	1.20205	0.943101	0.868479	0.869639	1.05627	1.21454	1.13646	0.777858	1.28702	1.12579	0.939928	0.651236	1.14753	1.01469	1.27278
651	Smar_temp_012679:	3157	0	552	966	630	1009	122	188	0	0	441	112	147	213	0	100	0	294	173	224	133	0	376	152	148	171	0	0	162	0	0	1.70668	1.27206	0.76256	0.876234	0.952256	1.10493	0.970406	1.20739	0.804559	0.899916	1.03609	0.634837	0.725528	0.85919	0.96926	1.36751
652	Smar_temp_001177:	627	0	130	215	125	157	20	37	0	0	45	26	33	48	0	28	0	60	35	41	31	0	86	39	35	36	0	0	26	0	0	1.42763	1.16651	0.769898	0.785152	1.1145	1.11985	0.80256	1.19612	0.830675	0.874884	1.03882	0.798726	0.761576	1.11822	1.10593	1.14467
653	Smar_temp_008511:	50683	0	7409	16816	8951	17507	1589	1467	0	0	7424	2148	2619	3069	0	1082	0	5135	3276	4322	1493	0	6713	2711	2349	2485	0	0	2800	0	0	1.12114	1.20319	0.881868	0.955571	0.884033	1.03339	1.00518	1.14101	0.905601	1.10283	0.999011	0.839316	0.744068	1.05955	0.970996	1.22766
654	Smar_temp_009700:	1664	0	248	593	302	521	57	69	0	0	231	46	84	123	0	35	0	174	92	122	52	0	249	98	85	76	0	0	70	0	0	1.53301	1.17827	0.780497	0.961758	0.937152	1.14287	1.03995	1.15531	0.740298	1.10885	0.94693	0.592409	0.657084	0.972963	0.978763	1.41609
655	Smar_temp_006789:	1747	0	319	556	329	543	80	76	0	0	232	79	77	104	0	54	0	157	96	114	70	0	227	110	94	101	0	0	75	0	0	1.26509	1.28283	0.735382	0.925881	0.908485	0.993243	1.29119	1.16521	0.73343	1.08348	0.927055	0.796764	0.659665	0.93879	1.01865	1.37462
656	Smar_temp_001826:	2665	0	481	753	486	945	97	37	0	0	383	176	149	149	0	100	0	228	203	196	81	0	239	168	137	163	0	0	158	0	0	0.421811	1.12332	1.08506	1.00804	0.853897	1.08506	1.09445	0.923423	0.916825	1.23614	1.15188	1.03189	0.734051	1.17795	0.95567	1.14296
657	Smar_temp_001244:	797	0	106	237	177	277	39	25	0	0	110	38	44	55	0	11	0	70	69	59	24	0	90	32	33	38	0	0	59	0	0	1.06199	1.27704	0.835967	1.04693	0.849823	1.04496	0.992148	1.01951	0.959085	1.01521	0.78026	1.03147	0.716279	1.12164	1.03147	1.14259
658	Smar_temp_012188:	989	0	142	364	150	333	22	31	0	0	148	30	45	47	0	21	0	103	52	89	29	0	167	60	48	44	0	0	52	0	0	1.43939	1.24655	0.81511	0.918434	0.840404	0.851337	0.967022	1.34653	1.02959	1.14804	1.03	0.627458	0.726174	1.02959	0.920272	1.31999
659	Smar_temp_012475:	1316	0	176	481	213	446	45	33	0	0	197	42	65	81	0	20	0	156	69	129	36	0	190	81	69	51	0	0	51	0	0	1.15845	1.08074	0.834919	1.07262	0.956975	1.04044	1.3053	1.26376	0.706499	1.25917	0.84969	0.704138	0.791345	0.955852	0.855024	1.30332
660	Smar_temp_003691:	3579	0	671	1146	664	1098	140	86	0	0	385	185	205	193	0	159	0	316	233	286	119	0	425	241	199	194	0	0	212	0	0	0.690827	1.15819	0.964191	0.926206	0.898797	0.90775	1.13646	0.955912	1.0407	1.12169	1.2639	0.898687	0.813469	1.14379	0.942407	1.14293
661	Smar_temp_011172:	50807	0	8006	16066	8792	17943	1604	1345	0	0	7703	2483	2396	2769	0	1222	0	5067	3446	4136	1729	0	6205	2956	2397	2658	0	0	2690	0	0	0.970829	1.22138	0.861817	0.946822	0.893041	0.995981	1.05427	1.248	0.866349	1.16763	0.968643	0.878192	0.728956	1.10983	0.940087	1.21561
662	Smar_temp_000265:	6521	0	1073	2322	1257	1869	273	149	0	0	618	281	387	426	0	172	0	640	448	501	228	0	923	471	371	302	0	0	330	0	0	0.720386	1.11633	0.864625	0.971016	0.961662	0.951757	1.12669	1.10234	0.915975	1.23274	0.974189	0.913717	0.752801	1.24351	0.982001	1.15368
663	Smar_temp_006575:	447	0	80	161	125	81	31	37	0	0	24	7	38	49	0	10	0	27	19	18	22	0	67	26	28	20	0	0	23	0	0	1.6539	1.1554	0.844025	0.971739	0.925466	1.08835	0.886848	0.9834	1.01541	0.902329	0.698438	0.48287	0.616977	0.838815	1.37963	1.63512
664	Smar_temp_003333:	3915	0	809	1335	629	1142	88	122	0	0	401	239	165	178	0	143	0	339	254	261	200	0	591	304	240	226	0	0	163	0	0	0.938626	1.29825	0.769279	0.869988	0.870531	0.829889	0.870789	1.53873	0.888388	1.10198	0.855403	1.01278	0.670232	1.38436	0.957691	1.20377
665	Smar_temp_005146:	4863	0	732	1684	855	1592	152	126	0	0	645	209	258	294	0	121	0	504	319	400	174	0	713	276	209	228	0	0	234	0	0	0.979034	1.22267	0.871396	0.824513	0.914218	0.992987	1.01115	1.352	0.836009	1.08883	1.09816	0.87216	0.72557	1.13969	0.951448	1.23759
666	Smar_temp_012526:	1687	0	251	592	293	551	43	73	0	0	230	63	79	120	0	41	0	178	98	141	50	0	257	74	77	82	0	0	80	0	0	1.67454	1.2371	0.768339	0.874199	0.920581	1.1671	0.844984	1.14695	0.835961	0.840139	1.09787	0.768476	0.729224	1.02405	1.00024	1.27803
667	Smar_temp_011284:	1867	20	359	562	491	435	96	78	0	0	124	70	175	162	19	79	0	118	142	83	110	0	183	132	84	86	0	0	123	1	1	0.826158	1.08174	1.18404	0.777307	0.901158	1.09608	0.743451	1.16509	1.07517	1.22148	1.14441	0.836871	0.633865	1.24126	1.02816	1.22345
668	Smar_temp_011579:	3560	0	590	1061	644	1265	142	106	0	0	507	194	136	177	0	83	0	366	260	312	127	0	365	207	193	186	0	0	198	0	0	0.993157	1.15428	0.708578	1.09759	0.97079	0.922193	1.2189	1.18991	0.865244	1.17721	0.848837	0.925357	0.827558	1.13618	0.887198	1.12792
669	Smar_temp_004752:	10523	20	1313	3294	1887	4009	375	246	0	0	1914	412	496	593	19	162	1	1079	769	854	315	0	1353	493	365	471	0	0	604	1	0	1.04481	1.31217	0.839703	0.888064	0.859808	1.00392	1.10822	1.33787	0.840173	1.19949	0.988838	0.823637	0.680515	1.06969	0.941585	1.25317
670	Smar_temp_009707:	2482	0	450	745	542	745	124	169	0	0	331	79	105	175	0	85	0	204	144	135	112	0	317	117	118	135	0	0	131	0	0	1.71979	1.41758	0.64541	0.873605	0.912262	1.07568	1.04767	1.13975	0.805225	0.866201	1.04183	0.584871	0.603703	0.885133	0.999463	1.48019
671	Smar_temp_003250:	5324	0	1217	1628	1204	1275	278	306	0	0	359	238	285	386	0	298	0	399	335	282	260	0	584	375	360	299	0	0	279	0	0	1.11184	1.17312	0.774109	0.967377	1.0234	1.04844	1.02101	0.944701	0.967622	1.00768	1.07121	0.816609	0.723307	1.16184	1.02591	1.17574
672	Smar_temp_000728:	1203	0	166	473	180	384	19	11	0	0	87	73	49	69	0	9	0	174	101	142	42	0	188	73	61	54	0	0	50	0	0	0.442871	1.01088	0.692354	0.934601	1.15245	0.974947	0.705463	1.69096	0.870226	1.11846	0.392909	1.37768	0.940506	1.75786	1.01911	0.709778
673	Smar_temp_009919:	11582	20	1961	3812	2194	3595	349	606	0	0	1601	413	567	866	19	309	1	1035	672	736	433	0	1576	632	634	585	0	0	546	1	0	1.63133	1.25613	0.785194	0.982296	0.874726	1.19926	0.839722	1.16562	0.801753	0.979197	0.930651	0.678511	0.622028	0.986773	0.961088	1.43475
674	Smar_temp_012106:	2355	0	403	700	464	788	91	99	0	0	330	93	108	143	0	66	0	237	166	151	101	0	261	145	94	141	0	0	128	0	0	1.24682	1.2544	0.783067	0.784722	1.01185	1.03684	0.995397	1.27201	0.824435	1.21048	0.957028	0.689672	0.644679	1.06919	1.04563	1.25156
675	Smar_temp_003086:	1834	0	238	648	319	629	58	36	0	0	272	70	111	109	0	39	0	183	114	177	48	0	268	93	85	66	0	0	104	0	0	0.869629	1.17053	0.984819	1.0108	0.823426	0.967075	1.04531	1.15951	0.950586	1.10594	1.26273	0.85757	0.796429	1.04199	0.808566	1.26086
676	Smar_temp_012216:	4857	32	679	1592	852	1702	145	179	0	0	809	155	220	294	31	91	1	455	307	367	130	0	676	254	240	218	1	0	283	0	0	1.50284	1.29547	0.787786	1.07837	0.815599	1.05277	0.97019	1.09145	0.947884	1.14127	0.958672	0.651434	0.657857	1.02827	0.916211	1.35643
677	Smar_temp_006264:	1458	0	229	457	304	468	81	31	0	0	173	67	76	68	0	32	0	134	116	112	61	0	177	99	69	67	0	0	94	0	0	0.649247	1.23566	0.797593	0.961291	0.913483	0.713636	1.2779	1.27755	0.96331	1.37924	0.889686	0.911488	0.763508	1.18877	0.911488	1.15163
678	Smar_temp_000675:	10170	0	1521	3289	1716	3644	300	313	0	0	1665	411	477	524	0	262	0	1008	625	850	331	0	1380	535	424	504	0	0	560	0	0	1.2196	1.2974	0.859524	0.861973	0.855341	0.944215	1.03611	1.28974	0.91078	1.08763	1.15176	0.754146	0.72127	1.0165	0.924792	1.2752
679	Smar_temp_007980:	7796	0	1194	2643	1330	2629	268	249	0	0	1171	284	354	465	0	239	0	790	459	620	213	0	1135	422	364	378	0	0	384	0	0	1.22241	1.2667	0.785102	0.899232	0.886362	1.03128	1.18115	1.04567	0.856172	1.04252	1.30696	0.705335	0.695626	1.02339	0.938791	1.32083
680	Smar_temp_010854:	2666	0	415	966	433	852	78	79	0	0	339	100	133	148	0	70	0	298	143	231	92	0	420	166	114	139	0	0	115	0	0	1.17206	1.19993	0.847709	0.758123	0.965294	0.943315	1.10912	1.36494	0.831056	1.10393	1.08358	0.754002	0.748265	1.0334	1.04806	1.24503
681	Smar_temp_004484:	1010	0	146	418	183	263	36	18	0	0	84	27	81	82	0	26	0	112	48	95	25	0	165	75	59	36	0	0	40	0	0	0.68044	0.95379	1.0695	0.976437	1.02898	1.0827	1.08573	0.945056	0.839411	1.24123	1.23194	0.710193	0.872796	1.00729	0.946924	1.22656
682	Smar_temp_006561:	712	0	151	205	122	234	30	22	0	0	91	45	31	36	0	30	0	65	39	48	23	0	66	54	43	55	0	0	33	0	0	0.850288	1.11819	0.882527	0.989049	0.96477	1.02487	1.4351	0.888937	0.823035	1.24206	0.936801	0.906775	0.712445	0.972678	1.10828	1.18329
683	Smar_temp_010618:	408	0	62	134	106	106	16	18	0	0	35	17	30	46	0	6	0	29	42	13	18	0	53	21	22	16	0	0	25	0	0	1.11747	1.20428	0.861729	1.0804	0.833005	1.32132	0.58099	1.11747	0.907796	1.0313	0.636837	1.05539	0.373416	1.5251	0.993305	1.27091
684	Smar_temp_005029:	389	0	52	138	70	129	11	9	0	0	48	19	22	29	0	6	0	41	28	38	10	0	53	18	21	15	0	0	20	0	0	0.961813	1.0826	0.885921	1.13838	0.895911	1.16781	0.873265	1.06868	0.861573	0.975753	0.863166	1.10182	0.830356	1.2062	0.869857	1.12205
685	Smar_temp_008793:	1330	0	193	421	195	521	36	19	0	0	230	71	57	53	0	22	0	142	83	127	28	0	160	81	61	81	0	0	78	0	0	0.671449	1.20063	0.923442	0.998486	0.861034	0.858639	1.25917	0.989504	1.02111	1.32586	0.785524	0.939107	0.770079	1.08657	1.07138	1.12695
686	Smar_temp_011778:	6463	456	916	2009	1065	2017	203	188	0	0	866	218	281	342	455	140	1	589	392	475	176	0	822	370	316	283	1	0	344	0	0	1.24551	1.31627	0.848811	1.1098	0.939428	1.03307	1.15673	1.16601	1.03499	1.29945	1.07838	0.762587	0.757603	1.17941	0.989964	1.37575
687	Smar_temp_010859:	5883	0	992	1860	1070	1961	185	263	0	0	884	233	253	330	0	143	0	540	368	409	251	0	768	353	298	300	0	0	304	0	0	1.45767	1.30597	0.747864	0.950146	0.870968	0.975475	0.950611	1.39116	0.852336	1.12551	0.854893	0.704637	0.659677	1.03178	0.907258	1.35237
688	Smar_temp_004961:	7478	0	1157	2439	1420	2462	239	223	0	0	999	339	415	544	0	183	0	751	543	564	264	0	918	412	355	355	0	0	373	0	0	1.01501	1.154	0.896052	0.940738	0.935245	1.17458	0.886353	1.20162	0.797844	1.09179	1.02228	0.889946	0.702368	1.16147	0.93195	1.23247
689	Smar_temp_005276:	2414	0	296	757	404	957	71	41	0	0	431	101	109	137	0	35	0	290	183	228	61	0	272	119	85	115	0	0	135	0	0	0.827653	1.14581	0.860372	0.915732	0.966334	1.08139	1.05011	1.23139	0.842903	1.28203	0.964322	0.860706	0.759739	1.1426	0.980012	1.13603
690	Smar_temp_002063:	2733	0	447	919	490	877	108	95	0	0	342	104	133	161	0	70	0	296	154	248	86	0	331	178	158	133	0	0	135	0	0	1.18539	1.07112	0.807197	1.05117	1.00373	0.977134	1.22934	1.07309	0.858574	1.18423	0.957464	0.725046	0.840962	0.97941	0.927223	1.21525
691	Smar_temp_008707:	5999	0	1262	1972	933	1832	190	181	0	0	670	311	263	260	0	297	0	557	299	476	190	0	763	473	388	387	0	0	293	0	0	0.922182	1.17704	0.857524	0.935286	0.924915	0.847742	1.30939	0.968036	1.02835	1.14018	1.11871	0.806964	0.790412	1.0494	1.00416	1.19758
692	Smar_temp_001964:	519	0	107	164	120	128	26	18	0	0	41	23	44	46	0	25	0	43	32	26	27	0	50	41	26	29	0	0	21	0	0	0.72757	0.964827	1.16037	0.768977	1.06312	1.21311	0.937083	1.09136	0.70957	1.21262	1.13329	0.871568	0.642816	1.08125	1.09893	1.29877
693	Smar_temp_002388:	2678	0	423	918	449	888	97	58	0	0	353	124	116	135	0	76	0	282	177	222	88	0	396	165	124	135	0	0	129	0	0	0.817809	1.2584	0.753667	0.855164	0.926412	0.877113	1.28852	1.24081	0.866445	1.13792	1.13748	0.884054	0.729303	1.18884	0.962478	1.19883
694	Smar_temp_005539:	10408	0	1595	3521	1747	3545	275	245	0	0	1478	439	508	577	0	255	0	1070	719	862	336	0	1425	656	518	486	0	0	558	0	0	0.915124	1.19633	0.859552	0.959998	0.892214	0.976302	0.937809	1.25503	0.937761	1.21575	1.04324	0.808081	0.718774	1.20833	0.894595	1.22408
695	Smar_temp_009044:	9167	0	1642	2911	1711	2903	297	374	0	0	1203	381	454	564	0	308	0	842	586	631	372	0	1136	579	479	483	0	0	477	0	0	1.22033	1.22891	0.835585	0.918644	0.913377	1.03804	0.930002	1.2138	0.880336	1.11043	1.0472	0.73271	0.68449	1.0815	0.928868	1.30858
696	Smar_temp_011889:	3255	22	484	1055	545	1149	90	85	0	2	498	135	158	158	19	61	2	330	212	271	113	0	421	203	144	166	0	0	184	1	1	1.04889	1.2312	0.894456	0.917943	0.88612	0.894456	0.986281	1.3944	0.956428	1.29404	0.847598	0.790168	0.727692	1.10197	0.971614	1.22784
697	Smar_temp_003149:	3772	0	642	1171	677	1282	133	178	0	0	564	146	140	219	0	118	0	380	226	281	133	0	470	200	180	211	0	0	192	0	0	1.54478	1.29287	0.666123	0.903134	0.954795	1.04201	1.09458	1.15425	0.834442	1.00348	1.0799	0.669116	0.706046	0.982208	0.96701	1.29442
698	Smar_temp_004114:	1965	0	325	616	391	633	88	61	0	0	242	94	115	120	0	57	0	176	127	153	62	0	230	113	94	111	0	0	121	0	0	0.943262	1.19105	0.938216	0.922627	0.886933	0.979008	1.13108	0.958725	0.960655	1.10912	1.0604	0.897849	0.771027	1.00829	1.06023	1.18678
699	Smar_temp_012339:	3763	40	683	1140	729	1171	165	117	0	0	462	186	182	224	38	141	1	333	265	267	149	1	408	239	216	176	0	1	190	1	0	0.884243	1.18137	0.824087	1.04391	0.938678	1.01426	1.16832	1.12609	0.837536	1.15507	1.1374	0.875124	0.752634	1.16814	0.828074	1.26783
700	Smar_temp_000343:	477	0	72	133	119	153	30	17	0	0	47	21	24	38	0	12	0	52	48	33	18	0	39	22	17	25	0	0	33	0	0	0.946429	1.05167	0.723321	0.846805	1.21893	1.14526	1.01052	1.0021	0.864558	1.09586	1.10417	0.909314	0.773552	1.25754	1.08252	0.957709
701	Smar_temp_010162:	3092	0	512	990	517	1073	88	94	0	0	436	134	134	159	0	93	0	344	201	284	111	0	356	191	155	152	0	0	159	0	0	1.09801	1.1231	0.809503	0.94551	1.0013	0.96053	1.01798	1.29659	0.88623	1.16511	1.09694	0.754179	0.826652	1.12033	0.855487	1.17092
702	Smar_temp_003092:	1962	0	331	654	391	586	61	90	0	0	238	71	120	151	0	49	0	180	120	131	82	0	250	121	103	97	0	0	97	0	0	1.36438	1.14679	0.920716	0.933535	0.921502	1.15857	0.782844	1.24311	0.830608	1.09668	0.877484	0.718177	0.670648	1.02756	0.981172	1.35982
703	Smar_temp_006202:	3886	0	541	1415	600	1330	118	48	0	0	554	138	182	223	0	108	0	467	252	362	88	0	582	247	183	162	0	0	171	0	0	0.57464	1.12957	0.833041	0.928967	0.964299	1.0207	1.27374	1.05351	0.832714	1.25385	1.43394	0.745303	0.747486	1.22716	0.874921	1.21705
704	Smar_temp_011710:	960	0	130	320	154	356	28	15	0	0	162	34	48	50	0	16	0	110	63	84	26	0	120	65	42	46	0	0	50	0	0	0.719281	1.125	0.935065	0.969231	0.926966	0.974026	1.13341	1.24675	0.875529	1.5	0.908876	0.705272	0.707865	1.10317	0.954192	1.22712
705	Smar_temp_003145:	4667	20	668	1556	881	1542	169	141	1	1	640	180	235	311	19	75	0	476	336	344	155	0	629	271	216	222	0	0	245	0	0	1.11816	1.21247	0.800056	0.969852	0.925872	1.0588	1.01618	1.22918	0.841673	1.21681	0.784415	0.815548	0.669117	1.15429	1.00584	1.25617
706	Smar_temp_006351:	5926	0	909	1974	939	2104	134	152	0	0	913	274	280	321	0	125	0	619	372	517	186	0	778	358	297	301	0	0	298	0	0	1.0553	1.18317	0.895173	0.98086	0.883201	1.02625	0.900607	1.29135	0.893854	1.18232	0.896487	0.84899	0.737665	1.11582	0.93265	1.2222
707	Smar_temp_010592:	693	0	134	201	144	214	30	49	0	0	93	23	28	63	0	22	0	77	37	32	30	0	66	40	29	52	0	0	21	0	0	1.75979	1.1321	0.670398	0.746157	1.24055	1.5084	1.0026	1.07743	0.472255	1.02918	0.849076	0.555831	0.515553	0.832068	1.25666	1.40731
708	Smar_temp_004210:	1420	0	210	476	276	458	70	30	0	0	173	43	69	97	0	47	0	172	106	102	39	0	187	90	47	77	0	0	70	0	0	0.73499	1.17197	0.745798	0.667667	1.12033	1.04844	1.30487	0.955487	0.786343	1.27851	1.51338	0.634851	0.664379	1.19075	1.13683	1.17113
709	Smar_temp_011843:	1544	0	320	464	355	405	83	78	0	0	125	68	100	119	0	71	0	125	94	83	66	0	158	103	80	103	0	0	87	0	0	1.06014	1.1331	0.937348	0.831897	1.02703	1.11544	1.01688	0.897042	0.934293	1.07107	1.07055	0.810123	0.68195	1.00947	1.2271	1.17665
710	Smar_temp_006195:	1254	0	163	433	252	406	72	40	0	0	151	34	52	69	0	21	0	159	88	122	49	0	174	68	48	45	0	0	61	0	0	1.22115	1.16378	0.597603	0.852832	1.13418	0.792973	1.42177	1.49591	0.747654	1.20818	0.991155	0.644262	0.870249	1.07858	0.8527	1.14874
711	Smar_temp_000884:	2821	0	451	929	537	904	78	92	0	0	364	105	161	210	0	87	0	283	206	211	97	0	340	167	144	123	0	0	152	0	0	1.07162	1.11135	0.910414	0.969557	0.950617	1.1875	0.763043	1.12986	0.883291	1.12442	1.20662	0.72652	0.708764	1.19709	0.851066	1.25651
712	Smar_temp_011572:	7006	0	1058	2390	1239	2319	227	188	0	0	946	302	359	428	0	204	0	673	465	589	186	0	1008	364	349	319	0	0	398	0	0	1.00478	1.23633	0.849367	0.966968	0.85072	1.01262	1.03598	0.994091	0.970468	1.00853	1.27682	0.862364	0.744538	1.13384	0.910908	1.23242
713	Smar_temp_005596:	5633	0	815	1877	833	2108	130	112	0	0	950	280	236	263	0	92	0	605	355	507	167	0	775	331	260	296	0	0	273	0	0	0.929298	1.23912	0.850242	0.957395	0.861312	0.947515	1.05534	1.38565	0.875763	1.21884	0.780212	0.918057	0.721793	1.13881	0.970517	1.20427
714	Smar_temp_007715:	4807	20	858	1347	1054	1528	213	79	0	1	516	304	354	305	19	167	1	395	408	336	224	0	397	308	200	267	0	0	312	0	0	0.419927	1.05179	1.19859	0.831858	0.92253	1.03268	0.921664	1.19068	0.931247	1.28106	1.09048	1.11465	0.784734	1.21778	0.978982	1.06237
715	Smar_temp_009157:	5248	0	904	1602	993	1749	182	235	0	0	741	216	277	301	0	157	0	472	299	431	190	0	573	296	279	278	0	0	320	0	0	1.37386	1.17172	0.913822	1.01104	0.884064	0.992998	0.96865	1.11078	0.966952	1.07264	1.00822	0.716951	0.80727	0.903495	0.922742	1.27125
716	Smar_temp_005026:	2475	0	450	788	506	731	96	74	0	0	286	121	164	190	0	95	0	201	172	160	97	0	278	160	145	113	0	0	122	0	0	0.804348	1.10807	1.01799	1.01206	0.86363	1.17938	0.927995	1.05435	0.816333	1.11675	1.16111	0.910397	0.687467	1.1509	0.850205	1.32467
717	Smar_temp_008471:	10120	0	1776	3269	1605	3470	258	244	0	0	1421	507	427	503	0	300	0	1054	676	831	356	0	1209	725	579	541	0	0	488	0	0	0.866268	1.14492	0.823604	1.00926	0.940322	0.970194	1.01356	1.2639	0.886739	1.26375	0.962533	0.832561	0.741374	1.22835	0.888393	1.19431
718	Smar_temp_002253:	4110	20	735	1314	763	1278	166	96	0	0	452	214	222	242	19	139	1	390	278	337	133	0	448	286	253	210	1	0	222	0	0	0.70356	1.06642	0.91007	1.07666	0.954509	0.992059	1.17193	0.974724	0.935706	1.2171	1.0575	0.936348	0.824794	1.17174	0.918846	1.13741
719	Smar_temp_002832:	4624	41	777	1360	905	1541	176	239	0	3	697	150	184	245	38	142	2	414	306	296	208	0	573	246	187	240	0	0	276	0	1	1.57161	1.4325	0.691271	0.818275	0.913433	0.920442	0.99365	1.36777	0.915115	1.07645	1.08759	0.579276	0.653082	1.01458	0.926841	1.3572
720	Smar_temp_006326:	1588	0	314	524	336	414	72	54	0	0	114	76	104	110	0	59	0	127	106	114	56	0	174	125	119	80	0	0	97	0	0	0.812784	1.00632	0.938023	1.14851	0.929657	0.992139	1.01276	0.842887	1.10734	1.20642	0.950262	0.928398	0.834495	1.21009	0.977261	1.05622
721	Smar_temp_011476:	5946	0	1056	1891	1016	1983	176	206	0	0	847	274	290	299	0	212	0	538	344	488	218	0	740	364	322	304	0	0	323	0	0	1.14165	1.23048	0.897507	0.958794	0.853086	0.92536	1.0138	1.20816	0.953259	1.08385	1.1304	0.778017	0.773803	1.01524	0.863201	1.28075
722	Smar_temp_004334:	7405	24	1152	2623	1244	2362	256	155	0	0	1016	309	382	404	23	206	0	676	450	555	223	0	1181	482	383	340	0	0	361	1	1	0.80091	1.2711	0.866902	0.938584	0.807967	0.916828	1.22497	1.15228	0.909771	1.18119	1.14944	0.840913	0.663346	1.13406	0.925277	1.34852
723	Smar_temp_010611:	3165	0	459	1104	661	941	139	111	0	0	372	105	217	243	0	88	0	283	194	240	97	0	465	155	139	135	0	0	181	0	0	1.15793	1.2075	0.941159	0.868174	0.862187	1.05392	1.0069	1.01189	0.921003	0.968108	1.322	0.769415	0.731183	0.987153	0.989248	1.32965
724	Smar_temp_012135:	23071	221	3603	7756	3986	7505	869	477	0	2	3142	994	1155	1252	218	648	2	2143	1483	1757	641	0	3263	1484	1193	1121	1	0	1224	0	1	0.766273	1.25143	0.861933	0.984929	0.849376	0.93432	1.26186	1.02973	0.943974	1.22518	1.15163	0.848082	0.696385	1.14372	0.956439	1.28698
725	Smar_temp_001631:	15174	20	2016	5048	2555	5535	584	156	0	1	2532	601	682	815	19	396	0	1626	1133	1211	380	0	2158	863	581	659	0	0	775	0	1	0.459561	1.28503	0.802369	0.866296	0.883047	0.958843	1.35747	1.11944	0.831559	1.28677	1.47848	0.817272	0.657669	1.21569	0.896143	1.25409
726	Smar_temp_004030:	2929	0	486	948	565	930	114	109	0	0	363	134	146	189	0	91	0	288	196	220	117	0	386	152	128	150	0	0	145	0	0	1.16268	1.25803	0.798391	0.813738	0.956799	1.03353	1.04599	1.24802	0.808269	0.966314	1.12847	0.86837	0.730888	1.09256	0.972056	1.22931
727	Smar_temp_010374:	1321	0	208	407	233	473	46	44	0	0	209	42	69	64	0	32	0	138	74	116	39	0	136	90	63	74	0	0	84	0	0	1.19932	1.08456	0.961173	0.983073	0.946948	0.891523	1.11931	1.06304	1.00685	1.40439	0.977071	0.563933	0.795986	0.886987	0.993597	1.23403
728	Smar_temp_001975:	20895	48	3459	6910	3680	6798	626	871	0	8	2990	831	1025	1343	38	522	7	1966	1158	1470	709	0	2860	1235	1055	1173	0	0	1002	2	3	1.42976	1.25156	0.842249	0.922287	0.874514	1.10355	0.965875	1.16383	0.836915	1.07964	0.911616	0.738434	0.653884	0.967213	1.04234	1.35192
729	Smar_temp_006953:	4632	0	782	1536	904	1410	175	128	0	0	496	198	233	286	0	147	0	447	368	345	173	0	595	309	261	201	0	0	269	0	0	0.838694	1.16816	0.777257	1.00649	0.956017	0.954058	0.991904	1.13355	0.977537	1.1916	1.11345	0.831779	0.737866	1.3373	0.844382	1.15561
730	Smar_temp_006977:	12939	0	2315	4098	2265	4261	452	510	0	0	1831	575	534	655	0	424	0	1216	769	947	519	0	1689	806	658	714	0	0	639	0	0	1.2585	1.30133	0.744392	0.897436	0.901054	0.913065	1.13999	1.2807	0.856686	1.09929	1.02368	0.754234	0.701725	1.03097	0.936562	1.30487
731	Smar_temp_011213:	9003	0	1467	2781	1738	3017	341	450	0	0	1336	312	418	598	0	233	0	868	528	675	297	0	1036	472	459	478	0	0	501	0	0	1.58899	1.20599	0.778597	1.01291	0.931388	1.11388	1.01635	1.04873	0.860201	1.04159	0.974727	0.634653	0.724294	0.906559	0.972321	1.32143
732	Smar_temp_010268:	8130	0	1469	2610	1493	2558	305	325	0	0	964	375	358	478	0	250	0	781	505	608	271	0	1004	519	467	481	0	0	438	0	0	1.20474	1.19824	0.746919	0.990251	0.951044	0.997282	1.11243	1.00457	0.932404	1.10051	0.941861	0.811334	0.740377	1.07503	1.04067	1.19775
733	Smar_temp_008113:	2730	0	458	956	514	802	102	115	0	0	309	89	137	173	0	82	0	258	160	201	93	0	409	172	151	132	0	0	146	0	0	1.33362	1.22172	0.761136	0.941491	0.91865	0.961142	1.05399	1.07849	0.966892	1.07243	1.0672	0.661474	0.715692	1.05961	0.981063	1.31151
734	Smar_temp_011088:	6909	0	1086	2176	1279	2368	243	243	0	0	1033	301	351	398	0	178	0	662	442	544	266	0	869	364	293	349	0	0	372	0	0	1.20871	1.26799	0.87135	0.856632	0.887631	0.988027	1.02631	1.32311	0.848606	1.06421	1.04274	0.808668	0.729413	1.00829	0.937625	1.27278
735	Smar_temp_004424:	3273	0	531	1059	538	1145	100	61	0	0	494	159	146	175	0	96	0	322	231	260	93	0	408	215	182	160	0	0	170	0	0	0.698874	1.19073	0.838727	1.05932	0.869161	1.00532	1.13079	1.0655	0.903248	1.25139	1.11437	0.85594	0.701807	1.22736	0.861323	1.23328
736	Smar_temp_007235:	3639	0	632	1159	675	1173	136	177	0	0	517	140	143	229	0	110	0	342	219	237	136	0	488	205	186	200	0	0	173	0	0	1.50985	1.32201	0.665167	0.924048	0.915433	1.0652	1.08621	1.16011	0.795108	1.01844	1.00217	0.687219	0.634379	1.00652	0.981741	1.36734
737	Smar_temp_000140:	958	0	137	345	148	328	20	16	0	0	143	35	42	44	0	12	0	96	70	72	30	0	154	74	52	43	0	0	54	0	0	0.755968	1.2395	0.788014	1.05397	0.812725	0.825539	0.874726	1.41744	1.06567	1.49988	0.612499	0.746172	0.609544	1.38143	0.916726	1.27337
738	Smar_temp_012967:	7545	0	1318	2588	1230	2409	182	175	0	0	931	372	366	413	0	210	0	746	507	584	274	0	1029	561	447	387	0	0	360	0	0	0.814473	1.15917	0.867503	0.988751	0.902811	0.978904	0.907654	1.27523	0.916684	1.24092	0.912111	0.883995	0.706758	1.291	0.91964	1.21042
739	Smar_temp_000814:	14363	0	2333	4604	2615	4811	498	475	0	0	2020	655	703	855	0	419	0	1355	939	1080	481	0	1885	783	661	772	0	0	781	0	0	1.11828	1.27728	0.838675	0.883887	0.878646	1.02001	1.046	1.13241	0.891639	1.04702	1.10568	0.838178	0.700323	1.07202	0.987899	1.2535
740	Smar_temp_010732:	1752	0	300	501	316	635	58	52	0	0	255	82	63	95	0	57	0	200	143	127	64	0	169	109	69	110	0	0	98	0	0	0.961013	1.17963	0.697188	0.804311	1.10142	1.05132	1.01763	1.18278	0.855656	1.27058	1.1096	0.754142	0.699401	1.24856	1.01165	1.10797
741	Smar_temp_010609:	1652	0	222	577	320	533	59	61	0	0	225	53	90	106	0	37	0	163	110	138	63	0	261	71	62	60	0	0	92	0	0	1.41852	1.29509	0.805243	0.7996	0.875578	0.948397	0.951836	1.46503	0.891088	0.915671	1.24024	0.739956	0.741287	1.06543	0.837686	1.30839
742	Smar_temp_007435:	27975	0	4807	8947	5212	9009	1080	1217	0	0	3903	1134	1262	1761	0	934	0	2520	1652	1884	919	0	3780	1522	1385	1569	0	0	1452	0	0	1.35888	1.32101	0.75709	0.900883	0.874614	1.05645	1.11221	1.02614	0.865079	0.989995	1.13076	0.732542	0.653878	0.984236	1.01354	1.34529
743	Smar_temp_002938:	5744	108	813	1834	937	2052	175	186	0	1	988	203	234	311	107	140	1	575	342	461	166	0	777	284	248	259	0	0	285	0	0	1.40248	1.3269	0.782152	0.95538	0.877618	1.03953	1.14492	1.25168	0.851417	1.09406	1.21664	0.698944	0.703621	1.0217	0.891757	1.34777
744	Smar_temp_006756:	3944	0	581	1352	678	1333	111	114	0	0	558	175	191	261	0	86	0	394	262	324	101	0	561	206	206	188	0	0	205	0	0	1.14139	1.21045	0.821796	1.03431	0.862236	1.12298	0.952359	1.01124	0.894604	1.03431	1.00481	0.891187	0.709047	1.14335	0.957389	1.23854
745	Smar_temp_000278:	6219	0	869	2134	963	2253	150	123	0	0	991	250	285	325	0	123	0	696	405	596	171	0	839	373	314	261	0	0	316	0	0	0.91407	1.14576	0.862471	1.05302	0.900273	0.98352	1.00591	1.27078	0.905775	1.25088	1.01295	0.794108	0.770923	1.16088	0.829049	1.21415
746	Smar_temp_009640:	577	0	89	176	104	208	25	8	0	0	79	31	22	28	0	13	0	64	49	47	17	0	63	37	26	33	0	0	34	0	0	0.498704	1.17352	0.69351	0.957737	1.00874	0.882649	1.33367	1.05975	0.906897	1.36293	0.946976	0.966238	0.740794	1.307	1.02858	1.0536
747	Smar_temp_012288:	2215	20	380	755	354	706	52	77	0	0	269	97	101	117	19	73	0	226	123	206	70	0	298	133	129	108	1	1	114	0	0	1.26788	1.15797	0.837037	0.995939	0.93914	0.969637	0.919116	1.15262	1.01035	1.02682	1.11977	0.800861	0.856031	1.09011	0.89168	1.19541
748	Smar_temp_011110:	412	0	88	140	79	105	17	18	0	0	33	17	20	26	0	20	0	30	23	26	11	0	55	33	34	23	0	0	25	0	0	1.06674	1.15612	0.745027	1.13701	0.840816	0.968535	1.12226	0.651899	1.24171	1.10357	1.06405	0.758009	0.728707	1.14237	1.02554	1.2332
749	Smar_temp_009549:	13239	0	2181	4433	2191	4434	420	345	0	0	1797	596	627	694	0	388	0	1349	799	1175	385	0	1711	852	745	663	0	0	692	0	0	0.95582	1.15268	0.854639	1.02014	0.908602	0.945964	1.1583	1.06664	0.943025	1.16665	1.07988	0.815925	0.791407	1.08884	0.907648	1.21007
750	Smar_temp_008412:	5057	0	842	1615	943	1657	199	157	0	0	648	241	225	273	0	147	0	486	362	403	190	0	642	297	262	243	0	0	281	0	0	0.999928	1.24475	0.747122	0.974338	0.918405	0.906507	1.13168	1.2101	0.909421	1.1045	1.04854	0.873525	0.761558	1.17157	0.880774	1.1935
751	Smar_temp_008116:	7898	0	1508	2236	1637	2517	324	460	0	0	1128	310	387	498	0	314	0	637	466	481	373	0	832	424	379	442	0	0	442	0	0	1.47172	1.31431	0.835041	0.887735	0.893926	1.07455	0.954915	1.19337	0.847242	0.993139	1.09055	0.645051	0.675005	0.893246	0.919718	1.40624
752	Smar_temp_012192:	2142	0	432	659	433	618	84	132	0	0	243	80	94	146	0	75	0	177	123	128	84	0	239	145	149	124	0	0	118	0	0	1.51155	1.17882	0.705625	1.12108	0.930934	1.09597	0.959672	0.961894	0.94455	1.09098	0.860822	0.641855	0.673218	0.984574	0.994876	1.36285
753	Smar_temp_009413:	18117	0	3059	5285	3591	6182	802	667	0	0	2793	768	881	1124	0	610	0	1636	1241	1184	680	0	1963	1013	805	964	0	0	985	0	0	1.10006	1.27326	0.841011	0.902106	0.907184	1.07298	1.12676	1.1215	0.803856	1.1352	1.18102	0.735765	0.656544	1.01278	0.923538	1.32403
754	Smar_temp_004979:	30472	0	4616	9803	5325	10728	997	771	0	0	4580	1334	1486	1679	0	820	0	3108	2071	2586	943	0	3847	1691	1361	1491	0	0	1706	0	0	0.955806	1.21985	0.867443	0.916504	0.900542	0.980106	1.07141	1.16903	0.91	1.13873	1.17269	0.820866	0.749293	1.1047	0.917475	1.21263
755	Smar_temp_006438:	2721	0	482	953	413	873	54	87	0	0	339	129	128	153	0	76	0	290	144	224	91	0	386	189	149	166	0	0	115	0	0	1.18919	1.15646	0.884903	0.882622	0.948461	1.05774	0.861434	1.24386	0.867885	1.11957	0.890119	0.834175	0.732604	1.08674	1.07343	1.21032
756	Smar_temp_000425:	1155	0	200	331	228	396	52	47	0	0	159	56	55	64	0	33	0	110	74	99	41	0	103	64	62	64	0	0	71	0	0	1.19046	1.08583	0.841747	1.08172	0.969285	0.979488	1.15536	1.03849	0.90826	1.11662	0.952875	0.816667	0.872356	0.946637	0.933333	1.17109
757	Smar_temp_010657:	9204	0	1548	2870	1766	3020	308	517	0	0	1271	346	436	642	0	232	0	918	505	730	331	0	1044	453	471	514	0	0	485	0	0	1.74063	1.16658	0.791754	0.975764	0.974834	1.16584	0.908962	1.1144	0.836991	0.938473	0.891092	0.6812	0.775194	0.871506	1.01196	1.28265
758	Smar_temp_011728:	1918	0	338	645	312	623	45	68	0	0	243	100	90	101	0	59	0	185	109	167	71	0	265	111	104	104	0	0	95	0	0	1.23676	1.22173	0.857782	0.914967	0.883024	0.962622	0.886649	1.29133	0.93741	0.976552	0.990529	0.910844	0.797108	1.07555	0.947277	1.20082
759	Smar_temp_004428:	1619	0	272	632	350	365	74	114	0	0	113	40	79	159	0	50	0	152	83	80	57	0	324	68	76	89	0	0	60	0	0	1.93872	1.31328	0.578214	0.715772	1.06679	1.16375	0.978008	0.969359	0.760391	0.640427	1.09416	0.652297	0.56147	1.05187	1.45136	1.37322
760	Smar_temp_005327:	4965	0	889	1683	815	1578	141	143	0	0	582	222	231	243	0	168	0	528	300	472	185	0	611	356	312	224	0	0	246	0	0	0.979932	1.07101	0.83616	1.03535	0.987102	0.879597	1.05396	1.26774	0.949707	1.18136	1.05542	0.785712	0.882409	1.15818	0.792791	1.16045
761	Smar_temp_003258:	8189	0	1406	2776	1423	2584	234	227	0	0	994	366	428	442	0	260	0	807	534	671	330	0	1111	552	430	385	0	0	417	0	0	0.929109	1.18061	0.887259	0.902183	0.921282	0.916281	0.946318	1.35069	0.928687	1.15815	1.07704	0.824962	0.766022	1.18925	0.867788	1.21908
762	Smar_temp_003036:	14623	0	3002	4424	2933	4264	661	602	0	0	1561	771	754	872	0	631	0	1190	916	895	658	0	1659	998	821	892	0	0	741	0	0	0.999793	1.23952	0.849729	0.90397	0.922468	0.982711	1.12361	1.0928	0.866414	1.09886	1.02387	0.880771	0.693789	1.07103	1.019	1.25547
763	Smar_temp_012811:	1829	0	260	547	318	704	75	44	0	0	305	84	60	75	0	39	0	213	138	188	66	0	191	93	82	73	0	0	102	0	0	0.973343	1.16754	0.630885	1.05455	1.01166	0.788607	1.3565	1.46001	0.833324	1.19601	1.05519	0.839358	0.892918	1.12744	0.729442	1.12556
764	Smar_temp_007671:	2347	0	404	827	376	740	57	56	0	0	279	101	128	124	0	76	0	245	135	208	79	0	323	171	131	118	0	0	115	0	0	0.865231	1.10842	0.966117	0.920232	0.939598	0.935926	0.946264	1.22059	0.970044	1.20122	1.09286	0.792905	0.797699	1.13875	0.926365	1.19579
765	Smar_temp_009890:	2236	0	323	734	426	753	76	61	0	0	348	81	129	158	0	58	0	205	160	153	73	0	300	123	99	92	0	0	119	0	0	0.991264	1.24509	0.922478	0.933702	0.829344	1.12986	0.93641	1.18627	0.829496	1.16005	1.24307	0.744662	0.618974	1.11529	0.845789	1.37234
766	Smar_temp_008921:	7949	20	1111	2440	1523	2855	329	236	0	1	1314	307	369	481	19	202	0	752	589	587	232	0	1006	366	312	365	0	1	480	0	0	1.10869	1.34317	0.789313	0.914878	0.858093	1.02889	1.12748	1.0899	0.877501	1.07322	1.30088	0.769362	0.669815	1.07677	0.914714	1.28143
767	Smar_temp_000659:	1151	0	221	345	274	311	60	67	0	0	101	49	70	83	0	39	0	91	77	76	61	0	119	66	64	57	0	0	70	0	0	1.27352	1.15076	0.852322	0.966149	0.976196	1.01061	0.919868	1.15948	0.945502	0.996341	0.919084	0.820576	0.815285	1.04005	0.954547	1.20192
768	Smar_temp_010968:	1795	0	242	613	381	559	89	45	0	0	215	67	119	125	0	37	0	175	128	153	65	0	241	93	77	63	0	0	102	0	0	0.876066	1.15123	0.914589	0.931707	0.916706	0.960703	1.10054	1.26543	0.859662	1.12531	1.13406	0.889021	0.801463	1.07879	0.835945	1.23504
769	Smar_temp_002079:	1039	0	212	370	164	293	27	37	0	0	121	33	44	55	0	60	0	94	56	63	37	0	169	82	62	53	0	0	45	0	0	1.1057	1.28262	0.753395	0.821239	0.900895	0.941744	1.04302	1.1057	0.973008	1.08616	1.38706	0.551983	0.603791	1.21085	0.886519	1.46442
770	Smar_temp_002080:	4830	0	1113	1370	1083	1264	219	342	0	0	443	235	237	340	0	258	0	351	285	251	289	0	500	278	282	284	0	0	235	0	0	1.37041	1.2867	0.771519	0.893265	0.979009	1.10682	0.90185	1.15803	0.829162	0.880595	1.00595	0.806813	0.700089	1.00558	0.975042	1.33923
771	Smar_temp_002761:	4878	0	856	1550	932	1540	175	278	0	0	678	160	224	332	0	140	0	473	255	331	196	0	609	278	244	276	0	0	228	0	0	1.6998	1.2365	0.756384	0.89707	0.966608	1.12107	0.982761	1.19842	0.77489	1.02207	0.932014	0.592062	0.676421	0.866653	1.02131	1.39454
772	Smar_temp_000170:	4736	0	737	1577	816	1606	157	85	0	0	653	239	205	248	0	108	0	469	369	418	165	0	605	305	298	166	0	0	245	0	0	0.66938	1.15214	0.754473	1.21431	0.877016	0.912728	1.11669	1.29939	0.885405	1.24283	0.941674	0.956305	0.781647	1.33353	0.664212	1.19904
773	Smar_temp_009806:	14799	0	2443	4748	2630	4978	477	513	0	0	2077	682	725	869	0	410	0	1435	914	1160	500	0	1881	838	706	827	0	0	784	0	0	1.1816	1.23481	0.859219	0.900747	0.898501	1.02988	1.02056	1.15166	0.886212	1.06916	1.01664	0.829924	0.726315	1.03316	1.00637	1.24039
774	Smar_temp_008663:	1824	0	327	586	350	561	84	65	0	0	243	69	97	98	0	81	0	151	104	135	71	0	241	112	96	79	0	0	97	0	0	1.03591	1.28011	0.862643	0.913799	0.837802	0.871536	1.25074	1.13153	0.901085	1.0661	1.3817	0.686062	0.749028	0.966112	0.785491	1.40833
775	Smar_temp_003475:	420	0	67	138	102	113	20	14	0	0	38	20	32	42	0	7	0	36	36	19	21	0	50	26	19	20	0	0	19	0	0	0.860404	1.10271	0.954817	0.863076	0.969604	1.2532	0.807382	1.29061	0.692348	1.18105	0.654934	1.1095	0.511735	1.31182	1.1095	1.2499
776	Smar_temp_006538:	1224	0	264	342	338	280	74	60	0	0	78	52	108	108	0	66	0	75	96	46	81	0	101	86	57	60	0	0	75	0	0	0.823023	1.05694	1.14357	0.772727	0.958647	1.14357	0.792829	1.11108	0.969992	1.16587	1.15909	0.861039	0.58797	1.24159	0.993506	1.21776
777	Smar_temp_013149:	2557	0	364	927	447	819	97	58	0	0	324	101	135	152	0	51	0	277	156	225	81	0	396	154	118	114	0	0	117	0	0	0.911486	1.17833	0.833062	0.894194	0.932925	0.937966	1.24133	1.27294	0.817194	1.167	0.984233	0.866297	0.757791	1.08959	0.977801	1.23512
778	Smar_temp_000708:	2725	0	435	902	466	922	74	43	0	0	372	113	154	139	0	79	0	283	195	226	98	0	336	200	129	129	0	0	154	0	0	0.578043	1.12536	0.998377	0.895902	0.92729	0.901133	0.928595	1.3174	0.976721	1.389	1.13767	0.767759	0.740521	1.23676	0.876468	1.19247
779	Smar_temp_007128:	419	0	103	143	80	93	12	32	0	0	34	15	21	33	0	25	0	28	15	21	19	0	57	31	36	23	0	0	16	0	0	1.62718	1.16793	0.769143	1.0241	0.882172	1.20865	0.785625	0.966141	0.901075	0.881866	0.987369	0.656123	0.661629	0.844758	1.00605	1.64713
780	Smar_temp_002101:	5369	0	840	1848	1106	1575	244	243	0	0	638	150	310	423	0	121	0	528	309	389	180	0	710	325	300	239	0	0	259	0	0	1.40432	1.11621	0.814325	1.03761	0.973968	1.11116	1.07096	1.04024	0.798284	1.12408	0.920704	0.60873	0.717564	0.952393	0.96991	1.38087
781	Smar_temp_002132:	1054	0	236	355	172	291	25	43	0	0	95	56	52	62	0	51	0	95	52	72	40	0	134	86	73	72	0	0	45	0	0	1.11653	1.1207	0.897609	0.918381	0.969266	1.07023	0.890684	1.03863	0.947614	1.08193	0.965132	0.859456	0.734601	1.09502	1.10501	1.18244
782	Smar_temp_004394:	2532	0	366	887	427	852	71	89	0	0	371	78	109	178	0	62	0	286	158	198	61	0	373	137	119	124	0	0	117	0	0	1.44193	1.2004	0.728683	0.928124	0.958223	1.18996	0.985976	0.98829	0.814296	1.06851	1.17191	0.633341	0.663385	1.09965	1.00685	1.29407
783	Smar_temp_012865:	10088	21	1719	3324	1684	3340	289	262	0	1	1424	468	491	524	19	325	2	935	642	758	358	0	1377	664	521	514	0	0	512	1	0	0.913037	1.25724	0.884878	0.919826	0.84959	0.944351	1.02806	1.24758	0.918304	1.17229	1.10952	0.822297	0.688758	1.15147	0.903121	1.28772
784	Smar_temp_003271:	1530	0	212	506	291	521	60	36	0	0	220	66	83	89	0	31	0	154	112	131	60	0	206	79	63	58	0	0	81	0	0	0.892822	1.231	0.862434	0.898557	0.893766	0.924779	1.08407	1.48804	0.817421	1.12676	1.05531	0.914243	0.760282	1.13026	0.803426	1.24005
785	Smar_temp_007923:	1017	0	161	302	175	379	27	34	0	0	186	37	48	59	0	36	0	104	66	85	37	0	103	54	46	42	0	0	52	0	0	1.22726	1.14854	0.923671	0.962157	0.924077	1.13535	0.89662	1.33555	0.797346	1.12949	1.41245	0.616677	0.755255	1.01202	0.700011	1.31691
786	Smar_temp_005388:	2393	0	328	862	307	896	56	54	0	0	440	95	63	95	0	55	0	260	134	207	55	0	435	124	104	114	0	0	101	0	0	1.28329	1.40093	0.569689	0.880227	0.805565	0.859054	1.42185	1.30705	0.878654	1.0495	1.22337	0.773543	0.641354	1.16574	0.928252	1.31153
787	Smar_temp_009630:	30786	0	4814	9914	5224	10834	1020	647	0	0	4613	1516	1381	1612	0	797	0	3018	2176	2519	905	0	3929	1854	1585	1526	0	0	1687	0	0	0.792042	1.23066	0.820909	1.02242	0.865037	0.958222	1.15066	1.10788	0.917648	1.19594	1.05876	0.894865	0.722011	1.18364	0.900768	1.20993
788	Smar_temp_013125:	61704	104	11074	16280	13388	20858	2910	3285	0	1	9315	3079	3041	3951	101	1883	3	4866	4152	3626	2930	0	5874	2827	2498	3762	0	0	3597	2	0	1.36719	1.36754	0.860914	0.854962	0.884216	1.11854	1.00179	1.21944	0.794814	0.967565	0.947446	0.822519	0.658892	0.91745	1.00497	1.32115
789	Smar_temp_006394:	375	0	47	101	89	138	12	11	0	0	45	17	19	24	0	6	0	39	47	29	16	0	34	13	9	16	0	0	37	0	0	0.986134	1.24988	0.792635	0.710975	1.04929	1.00122	0.56811	1.43438	1.1297	1.02696	1.01856	0.982886	0.780241	1.43503	0.925069	0.886106
790	Smar_temp_011686:	4706	0	835	1455	828	1588	142	236	0	0	669	235	177	275	0	122	0	454	273	337	180	0	600	242	224	309	0	0	230	0	0	1.60638	1.33376	0.691404	0.867662	0.924686	1.07422	0.974719	1.2252	0.823188	0.937385	0.823453	0.834032	0.686386	0.977088	1.09666	1.24847
791	Smar_temp_001547:	2993	0	429	1023	624	917	111	129	0	0	359	121	175	246	0	46	0	257	209	210	87	0	434	133	156	139	0	0	180	0	0	1.4423	1.24121	0.820511	1.06389	0.819964	1.1534	0.853219	0.972712	0.941511	0.907038	0.748083	0.920588	0.67001	1.0932	1.05754	1.2778
792	Smar_temp_006502:	6294	0	1022	2172	1119	1981	222	176	0	0	760	265	305	403	0	190	0	668	415	486	206	0	892	391	306	320	0	0	288	0	0	0.968631	1.19007	0.789836	0.867636	0.977145	1.04362	1.11589	1.13374	0.81772	1.10865	1.14493	0.823829	0.710917	1.17831	0.994813	1.21891
793	Smar_temp_004966:	2102	0	344	677	369	712	64	62	0	0	296	105	107	105	0	68	0	184	136	169	73	0	293	109	92	111	0	0	127	0	0	1.02669	1.34376	0.900329	0.830373	0.802383	0.883501	0.988007	1.20885	1.01609	0.983812	1.20788	0.901122	0.736972	1.08809	0.952615	1.22734
794	Smar_temp_009154:	5505	0	1069	1710	1031	1695	220	269	0	0	593	266	234	291	0	186	0	562	308	449	246	0	621	348	292	345	0	0	274	0	0	1.34361	1.16911	0.730665	0.879359	1.0674	0.908648	1.13936	1.22873	0.863137	1.048	0.896014	0.808149	0.852782	0.970241	1.04816	1.13625
795	Smar_temp_000330:	2169	0	394	652	532	591	109	59	0	0	209	81	173	158	0	91	0	149	191	102	113	0	228	163	101	89	0	0	152	0	0	0.610525	1.16332	1.0818	0.85278	0.838708	0.988001	0.835339	1.16931	1.04859	1.37627	1.27148	0.754503	0.574149	1.31763	0.829022	1.29787
796	Smar_temp_001330:	1660	0	223	531	267	639	48	49	0	0	316	54	66	119	0	35	0	202	104	144	33	0	182	85	80	75	0	0	67	0	0	1.36612	1.0715	0.772763	1.1215	0.988244	1.39331	1.1177	0.920038	0.651885	1.19159	1.16833	0.629066	0.704491	1.01188	0.873703	1.28468
797	Smar_temp_008483:	18143	0	2801	5444	3471	6427	678	593	0	0	2846	781	903	1071	0	465	0	1716	1297	1339	638	0	2071	962	753	945	0	0	1084	0	0	1.10661	1.26781	0.86701	0.895927	0.889816	1.02831	1.02101	1.19059	0.881608	1.1446	1.07532	0.787116	0.694326	1.05484	0.9524	1.25005
798	Smar_temp_008131:	8271	20	1207	2559	1498	2987	277	279	0	1	1400	321	387	512	19	178	1	795	555	606	240	0	1012	429	364	425	0	0	469	0	0	1.27627	1.2782	0.835001	0.974724	0.86024	1.1047	1.02097	1.09787	0.86693	1.14878	1.01056	0.736411	0.65573	1.0259	0.975	1.29782
799	Smar_temp_008831:	19923	0	3387	6433	3463	6640	696	647	0	0	2918	825	908	1118	0	705	0	1913	1212	1498	666	0	2607	1210	1005	1011	0	0	983	0	0	1.09898	1.25507	0.812035	0.91895	0.892253	0.99984	1.15627	1.13126	0.851702	1.1064	1.22437	0.730845	0.698691	1.05011	0.895618	1.31857
800	Smar_temp_005578:	16813	0	3027	5316	3127	5343	641	635	0	0	2158	666	810	928	0	562	0	1625	1041	1203	665	0	2022	1163	859	941	0	0	893	0	0	1.12792	1.20297	0.819252	0.897513	0.961897	0.9386	1.10217	1.18121	0.898636	1.21514	1.03123	0.692344	0.7121	1.04757	0.978222	1.27094
801	Smar_temp_011234:	9220	0	1424	2684	1754	3358	421	259	0	0	1585	412	420	517	0	271	0	826	654	632	281	0	1052	482	386	486	0	0	535	0	0	0.956073	1.34642	0.822561	0.931163	0.844983	1.01253	1.26169	1.03728	0.83748	1.16275	1.2322	0.794397	0.646524	1.02376	0.93708	1.29598
802	Smar_temp_007730:	1137	0	165	361	244	367	59	33	0	0	144	45	62	80	0	25	0	119	90	90	46	0	128	62	51	43	0	0	59	0	0	0.931967	1.11675	0.800304	0.973508	1.02125	1.03265	1.12676	1.29911	0.749129	1.18348	1.04408	0.844934	0.772378	1.14274	0.807382	1.2156
803	Smar_temp_000887:	3335	0	569	1092	624	1050	114	108	0	0	420	142	191	198	0	103	0	311	211	266	134	0	411	216	179	153	0	0	177	0	0	1.01443	1.14946	0.934807	0.960758	0.904574	0.969067	0.976408	1.25865	0.900939	1.15935	1.06098	0.792652	0.773687	1.074	0.854055	1.27048
804	Smar_temp_008893:	1960	0	301	641	388	630	81	70	0	0	264	73	105	120	0	48	0	190	132	139	85	0	272	110	73	95	0	0	102	0	0	1.17478	1.2975	0.827476	0.741574	0.92217	0.945687	1.05458	1.42652	0.817869	1.11744	1.0384	0.754522	0.67464	1.05842	0.981912	1.3037
805	Smar_temp_008917:	3990	0	710	1377	604	1299	76	78	0	0	485	202	191	202	0	127	0	417	259	328	131	0	543	303	225	227	0	0	195	0	0	0.725725	1.14263	0.916295	0.918255	0.930178	0.969066	0.831214	1.21885	0.991657	1.23658	1.00522	0.87389	0.73165	1.31712	0.982045	1.14682
806	Smar_temp_012255:	3725	888	535	742	642	918	151	64	0	1	309	180	165	166	887	133	1	232	262	196	129	0	221	158	124	149	0	0	196	0	0	0.694093	1.49524	1.29024	1.16356	1.26873	1.29806	1.36469	1.39903	1.23881	1.48261	1.73089	1.36522	1.07185	1.65596	1.1301	1.36584
807	Smar_temp_002535:	4084	0	660	1387	727	1310	144	179	0	0	587	132	171	281	0	125	0	423	233	280	133	0	602	224	191	210	0	0	168	0	0	1.52356	1.278	0.692582	0.852116	0.950776	1.1381	1.1127	1.13203	0.720426	0.99934	1.17195	0.623511	0.629355	0.999162	0.99195	1.39695
808	Smar_temp_001480:	414	0	77	120	86	131	15	13	0	0	39	21	21	25	0	12	0	46	37	30	21	0	33	31	19	25	0	0	25	0	0	0.812745	0.94875	0.842442	0.851299	1.21145	1.00291	0.839643	1.3129	0.918693	1.38896	0.837915	0.861901	0.790076	1.35967	1.02607	0.940854
809	Smar_temp_007779:	7950	0	1360	2681	1424	2485	269	294	0	0	994	336	367	502	0	245	0	766	494	564	264	0	1130	485	418	432	0	0	389	0	0	1.20688	1.24983	0.764234	0.911397	0.914056	1.04536	1.05463	1.08373	0.873937	1.05748	1.05307	0.790389	0.673012	1.10983	1.01621	1.27968
810	Smar_temp_001094:	1575	0	260	521	311	483	71	81	0	0	214	50	92	117	0	47	0	138	67	109	42	0	212	82	78	93	0	0	81	0	0	1.57773	1.2301	0.894273	0.90691	0.863724	1.13728	1.15616	0.818081	0.849294	0.953418	1.09504	0.62709	0.682216	0.702502	1.16639	1.44477
811	Smar_temp_010457:	13489	0	2019	4576	2088	4806	367	213	0	0	1965	662	614	676	0	348	0	1488	894	1283	355	0	1821	796	653	663	0	0	690	0	0	0.681542	1.17305	0.866825	0.95339	0.912668	0.954355	1.13549	1.1359	0.927501	1.16217	1.15156	0.920275	0.786931	1.20172	0.921665	1.14756
812	Smar_temp_007518:	556	0	98	161	144	153	26	41	0	0	65	17	36	53	0	18	0	39	41	27	33	0	58	22	27	20	0	0	32	0	0	1.61536	1.24409	0.863354	0.951451	0.880283	1.27105	0.697145	1.30017	0.807553	0.775257	1.04207	0.630385	0.609426	1.03468	0.74163	1.54385
813	Smar_temp_009881:	1990	0	319	623	302	746	59	46	0	0	304	101	82	68	0	46	0	218	115	209	53	0	220	126	103	117	0	0	122	0	0	0.950196	1.12798	0.867305	1.03136	0.933432	0.719229	1.28733	1.09479	1.07762	1.26167	0.899559	0.844588	0.894896	1.01579	0.978384	1.08705
814	Smar_temp_001126:	2476	0	361	813	500	802	101	77	0	0	335	97	153	162	0	42	0	236	169	201	103	0	305	145	118	97	0	0	134	0	0	1.05624	1.14253	0.931926	0.995485	0.896185	0.986745	1.0003	1.4129	0.827392	1.22327	0.797968	0.829547	0.763276	1.0435	0.829547	1.28958
815	Smar_temp_012954:	2536	0	399	867	450	820	80	61	0	0	321	106	142	167	0	66	0	255	167	192	66	0	342	166	127	140	0	0	137	0	0	0.861576	1.15382	0.923009	0.931024	0.909613	1.08551	1.00188	0.932197	0.94155	1.21693	1.05135	0.821615	0.684885	1.14773	1.08515	1.21067
816	Smar_temp_012353:	17652	20	3348	5430	3251	5603	602	781	0	1	2328	828	821	1094	19	661	1	1571	1047	1146	681	0	2112	1078	925	1081	0	0	874	0	0	1.26661	1.26441	0.820957	0.898153	0.911485	1.09394	1.00544	1.10443	0.846969	1.04671	1.04094	0.779145	0.664903	1.01462	1.01722	1.30899
817	Smar_temp_003784:	6790	0	963	2249	1069	2509	202	158	0	0	1172	275	253	322	0	155	0	728	455	547	211	0	1005	375	262	335	0	0	334	0	0	1.04213	1.34914	0.714534	0.821401	0.876014	0.909407	1.20023	1.39171	0.845547	1.17567	1.13488	0.772815	0.658214	1.15187	0.941429	1.26414
818	Smar_temp_002469:	1686	0	306	552	322	506	68	55	0	0	178	93	96	121	0	53	0	154	103	124	52	0	201	105	101	100	0	0	81	0	0	0.941116	1.11218	0.910613	1.00813	0.929584	1.14775	1.10574	0.889782	0.838178	1.04806	0.954312	1.01267	0.748496	1.06583	1.08889	1.17213
819	Smar_temp_001144:	2272	0	350	843	323	756	53	53	0	0	308	96	91	114	0	54	0	258	126	214	62	0	367	147	126	108	0	0	94	0	0	1.06516	1.17333	0.759311	0.970249	0.919769	0.951225	1.15419	1.24603	0.874605	1.13196	1.00153	0.824308	0.762909	1.17234	0.927347	1.22438
820	Smar_temp_007889:	2896	0	509	924	480	983	87	68	0	0	405	141	135	156	0	106	0	285	190	223	85	0	352	193	152	165	0	0	152	0	0	0.806025	1.19398	0.881494	0.935949	0.908695	1.01861	1.09354	1.00753	0.932926	1.18841	1.18486	0.816106	0.711014	1.16616	0.955017	1.2138
821	Smar_temp_010354:	1519	0	256	522	296	445	47	87	0	0	203	39	71	114	0	46	0	138	91	77	70	0	246	84	66	74	0	0	65	0	0	1.744	1.37136	0.697998	0.750224	0.902415	1.12073	0.81484	1.40321	0.749582	0.954831	1.06619	0.520023	0.503521	1.04942	0.98671	1.55716
822	Smar_temp_002054:	1238	0	243	374	390	231	89	98	0	0	57	26	99	117	0	39	0	69	104	39	105	0	137	80	68	31	0	0	79	0	0	1.28019	1.21255	0.840271	0.9263	0.988749	0.993048	0.724405	1.37164	1.0856	1.08976	0.81766	0.573424	0.558858	1.42915	0.683698	1.32243
823	Smar_temp_011423:	560	0	94	205	86	175	17	19	0	0	73	28	28	33	0	15	0	57	22	55	19	0	84	32	35	25	0	0	17	0	0	1.31618	1.11933	0.889393	1.01713	0.889756	1.04821	1.28718	1.31618	0.632558	0.929943	0.950656	0.953191	0.858537	0.818605	0.851064	1.33486
824	Smar_temp_005261:	1998	0	296	716	339	647	82	64	0	0	287	61	94	132	0	64	0	215	99	150	42	0	327	107	79	111	0	0	83	0	0	1.27434	1.27443	0.773768	0.744763	0.927292	1.08657	1.42564	0.836283	0.756083	1.00873	1.45946	0.636399	0.646948	0.901834	1.15804	1.36984
825	Smar_temp_000023:	2659	0	481	831	528	819	113	108	0	0	297	122	125	163	0	88	0	252	182	175	105	0	330	163	123	165	0	0	147	0	0	1.13074	1.27066	0.757519	0.818234	0.984541	0.987804	1.07778	1.09933	0.903895	1.08433	1.01137	0.823473	0.683709	1.11911	1.11371	1.17735
826	Smar_temp_000557:	2784	0	711	810	682	581	152	157	0	0	95	173	206	305	0	163	0	197	167	73	109	0	213	218	193	246	0	0	116	0	0	0.901395	0.903813	1.03817	0.932979	1.1654	1.53709	0.909796	0.625809	0.815017	1.05383	0.897672	1.16592	0.431848	1.17334	1.6579	0.783503
827	Smar_temp_000599:	11410	40	1892	3429	2502	3547	624	591	0	0	1511	310	470	871	38	305	1	1111	817	523	393	2	1349	686	498	694	0	0	614	0	1	1.42451	1.30907	0.62507	0.875843	1.04225	1.15837	1.13735	0.947261	0.789415	1.20648	0.972172	0.527066	0.490635	1.05041	1.17995	1.37034
828	Smar_temp_009927:	1134	0	158	391	175	410	14	21	0	0	172	51	65	60	0	16	0	116	74	119	30	0	142	70	67	45	0	0	71	0	0	0.861266	1.05329	1.07724	1.22986	0.82056	0.994373	0.5184	1.23038	1.12215	1.28492	0.726807	0.892776	0.841782	1.16956	0.787743	1.16031
829	Smar_temp_006965:	340	0	50	95	73	122	16	17	0	0	45	6	13	16	0	6	0	41	27	32	10	0	26	21	15	18	0	0	30	0	0	1.58356	0.979501	0.637347	1.07368	1.20276	0.784427	1.02083	0.931507	1.1453	1.50316	0.816	0.334426	0.93874	1.03077	1.00328	1.02795
830	Smar_temp_011803:	5032	0	703	1662	893	1774	165	129	0	0	785	191	254	297	0	100	0	513	345	414	147	0	668	283	226	230	0	0	284	0	0	1.03401	1.2169	0.861176	0.973336	0.875535	1.00697	1.04117	1.17829	0.902098	1.21882	1.01819	0.770664	0.706572	1.09586	0.928025	1.25517
831	Smar_temp_012329:	28465	20	4645	8446	5768	9586	1224	1273	0	1	4225	1121	1383	1835	19	725	1	2619	1888	1989	1089	0	3095	1526	1349	1482	0	0	1620	0	0	1.35247	1.23501	0.808085	0.978783	0.920785	1.07219	1.04723	1.15699	0.833995	1.10721	0.956484	0.716628	0.69929	0.971965	0.947406	1.30877
832	Smar_temp_007210:	1162	0	185	368	230	379	48	48	0	0	153	42	56	78	0	29	0	122	78	93	41	0	130	66	60	55	0	0	62	0	0	1.31083	1.11546	0.768809	1.02409	1.01643	1.07084	1.05437	1.11967	0.826477	1.1265	0.984602	0.696056	0.774822	1.03976	0.911503	1.23771
833	Smar_temp_000387:	1279	0	207	455	225	392	46	55	0	0	174	38	64	80	0	35	0	123	59	94	42	0	202	79	65	65	0	0	57	0	0	1.51036	1.24796	0.79957	0.882678	0.88202	0.999463	1.16215	1.15337	0.826565	1.07279	1.04472	0.59896	0.674064	0.855567	1.02454	1.44826
834	Smar_temp_010349:	67809	60	12257	23109	10590	21793	1825	1532	1	0	8537	3463	3227	3306	57	2459	2	6603	4005	5450	2270	1	9550	4802	3728	3799	1	0	3189	1	0	0.800324	1.21263	0.894148	0.892479	0.889059	0.916037	1.10346	1.18586	0.936977	1.14959	1.10988	0.879101	0.733813	1.17673	0.964396	1.21887
835	Smar_temp_007453:	954	0	229	289	162	274	29	45	0	0	103	45	35	46	0	54	0	83	53	60	44	0	97	85	73	58	0	0	43	0	0	1.15721	1.10796	0.713187	1.0523	0.999949	0.937332	1.05418	1.13149	0.924169	1.22528	0.982361	0.684187	0.722855	1.13909	0.881841	1.30883
836	Smar_temp_004027:	14048	0	1990	4654	2303	5101	372	292	0	0	2148	618	677	710	0	307	0	1517	962	1350	403	0	1820	773	639	641	0	0	818	0	0	0.895056	1.18041	0.887325	0.96925	0.897673	0.930577	0.985302	1.2353	0.978179	1.1725	1.08905	0.855253	0.798852	1.15038	0.887083	1.15968
837	Smar_temp_013064:	23500	0	5395	6498	5528	6079	1130	2039	0	0	2261	937	1139	1687	0	1008	0	1726	1219	1111	1556	0	2290	1410	1343	1488	0	0	1155	0	0	1.60667	1.27451	0.74515	0.90027	1.02683	1.10366	0.868981	1.22608	0.807699	0.945183	0.813852	0.671404	0.660952	0.852455	1.06622	1.43782
838	Smar_temp_012615:	35067	20	5652	11351	6060	11984	1218	792	1	1	4946	1650	1656	1804	19	963	0	3473	2394	2929	1124	0	4372	2246	1849	1715	0	0	1914	0	0	0.810866	1.1899	0.844213	1.01065	0.895298	0.919662	1.16306	1.15077	0.9242	1.22764	1.05711	0.854237	0.755061	1.15597	0.887889	1.20767
839	Smar_temp_008570:	5268	0	777	1798	885	1808	147	94	0	0	800	218	289	342	0	129	0	548	355	386	154	0	733	336	227	267	0	0	242	0	0	0.720127	1.19446	0.956777	0.855975	0.888052	1.13224	0.988727	1.17978	0.796745	1.26699	1.12562	0.817491	0.625525	1.16878	1.00124	1.28926
840	Smar_temp_012779:	3780	0	711	1304	645	1120	87	124	0	0	427	176	214	253	0	146	0	334	219	292	122	0	494	265	261	182	0	0	183	0	0	1.02208	1.09815	0.961763	1.06411	0.864456	1.13704	0.790481	1.00559	0.957558	1.08041	1.09171	0.835443	0.755752	1.14593	0.863924	1.28672
841	Smar_temp_006792:	3273	0	518	1100	608	1047	131	76	0	0	407	147	178	194	0	95	0	319	222	265	109	0	441	200	162	152	0	0	174	0	0	0.789817	1.19289	0.871103	0.930548	0.906562	0.949405	1.15987	1.13276	0.894633	1.14882	1.1588	0.887129	0.7531	1.14143	0.917304	1.2152
842	Smar_temp_004146:	739	0	101	235	126	277	28	13	0	0	124	30	29	33	0	16	0	79	55	69	21	0	91	42	35	29	0	0	44	0	0	0.754911	1.21773	0.723776	1.08974	0.896858	0.823607	1.30335	1.21947	0.931637	1.30769	1.1591	0.792437	0.783332	1.16455	0.766022	1.19428
843	Smar_temp_007831:	1527	0	210	519	233	565	44	40	0	0	256	50	67	81	0	35	0	179	82	145	28	0	207	85	65	82	0	0	80	0	0	1.24831	1.17348	0.846039	0.91068	0.93213	1.02282	1.2376	0.87382	0.92795	1.19089	1.2119	0.643489	0.755077	0.951149	1.05532	1.22457
844	Smar_temp_004491:	2418	0	470	802	437	709	74	129	0	0	242	115	116	173	0	77	0	255	118	187	92	0	292	149	139	162	0	0	97	0	0	1.51868	1.09772	0.80031	0.891659	1.08437	1.19357	0.936969	1.08309	0.757008	0.955807	0.842852	0.834469	0.795202	0.920896	1.17551	1.16407
845	Smar_temp_001858:	4449	0	809	1560	758	1322	142	83	0	0	508	195	228	267	0	156	0	412	305	297	142	0	621	374	299	212	0	0	207	0	0	0.602175	1.13528	0.857834	1.05405	0.888799	1.00457	1.09954	1.03023	0.919035	1.31844	1.06045	0.81118	0.640712	1.35413	0.881898	1.29319
846	Smar_temp_012716:	3874	0	798	1197	880	999	166	328	0	0	390	133	208	331	0	136	0	299	178	197	206	0	467	201	222	234	0	0	177	0	0	1.80946	1.26267	0.764973	0.900359	0.96866	1.21734	0.830429	1.13643	0.779982	0.81519	0.827357	0.646313	0.638214	0.784389	1.13712	1.51389
847	Smar_temp_002982:	2660	0	492	841	454	873	72	99	0	0	320	134	111	123	0	76	0	265	172	245	104	0	289	183	176	136	0	0	154	0	0	1.17895	1.08689	0.773308	1.13144	0.960102	0.856909	0.929186	1.23849	1.03355	1.17644	0.835151	0.829864	0.887641	1.15436	0.84225	1.11687
848	Smar_temp_003929:	745	20	99	312	114	200	17	35	0	1	81	13	31	55	19	16	0	81	31	64	18	0	158	35	40	24	0	0	24	0	1	2.31038	1.20922	0.64932	0.964776	0.967067	1.15202	0.974531	1.1882	0.784211	0.844179	1.2162	0.489141	0.764103	1.01294	0.90303	1.50863
849	Smar_temp_000625:	1640	0	287	547	227	579	31	55	0	0	241	91	59	66	0	55	0	164	82	171	47	0	223	86	100	85	0	0	83	0	0	1.38452	1.22229	0.779261	1.04466	0.849223	0.871715	0.986629	1.18313	1.03566	0.898407	1.09507	0.8981	0.88547	1.02318	0.838885	1.17897
850	Smar_temp_008283:	9346	0	1497	2940	1538	3371	246	288	0	0	1457	397	392	475	0	261	0	987	612	805	287	0	1108	551	452	497	0	0	530	0	0	1.16907	1.19804	0.81023	0.959832	0.930758	0.981783	0.97196	1.16501	0.955403	1.17006	1.08849	0.735251	0.759129	1.10322	0.920453	1.19831
851	Smar_temp_012376:	2398	0	404	758	441	795	80	83	0	0	343	113	116	156	0	75	0	205	162	179	72	0	290	133	147	110	0	0	133	0	0	1.11714	1.21034	0.832146	1.15111	0.815768	1.11909	0.98642	0.969085	0.909694	1.04148	1.10191	0.843683	0.712305	1.10805	0.821284	1.30139
852	Smar_temp_009962:	10555	0	1575	3494	1875	3611	354	331	0	0	1601	397	523	654	0	263	0	1022	667	817	275	0	1438	584	511	526	0	0	591	0	0	1.18305	1.24329	0.842628	0.980112	0.854985	1.05369	1.06282	0.982899	0.921334	1.12013	1.11906	0.736785	0.683486	1.03981	0.976194	1.29597
853	Smar_temp_005084:	3756	0	502	1262	630	1362	112	91	0	0	614	142	192	226	0	78	0	412	235	341	98	0	503	191	154	172	0	0	194	0	0	1.08074	1.18625	0.907041	0.913026	0.900298	1.06766	1.05989	1.16388	0.849199	1.13239	1.16255	0.780069	0.74515	1.02867	0.944872	1.2432
854	Smar_temp_000541:	5589	0	1161	1658	1262	1508	254	181	0	0	499	269	427	350	0	281	0	370	400	325	288	0	552	430	308	284	0	0	370	0	0	0.690432	1.12229	1.14056	0.894269	0.827085	0.934885	0.891352	1.09859	1.08661	1.24849	1.16513	0.858722	0.726493	1.17472	0.906607	1.2264
855	Smar_temp_011240:	331	0	54	142	61	74	12	0	0	0	21	9	28	25	0	12	0	29	21	19	8	0	64	33	21	13	0	0	15	0	0	0	1.05059	1.06996	0.906495	0.913494	0.955322	1.06745	0.803886	1.09991	1.42449	1.36214	0.745495	0.598496	1.53988	1.07683	1.26936
856	Smar_temp_002817:	1778	0	318	640	298	522	60	62	0	0	196	73	84	108	0	52	0	181	91	131	58	0	270	131	104	104	0	0	72	0	0	1.16327	1.17202	0.783096	0.908569	0.963296	1.00684	1.2013	1.08822	0.822958	1.14445	0.914283	0.78191	0.697192	1.04013	1.11395	1.27893
857	Smar_temp_007848:	21938	60	2877	6800	3753	8448	695	459	0	2	3966	981	1076	1205	57	459	3	2238	1522	1936	592	0	2680	978	805	1021	1	0	1261	0	0	0.932591	1.27149	0.924958	0.902701	0.854662	1.03585	1.08249	1.20282	0.872529	1.0967	1.21655	0.885467	0.739332	1.05312	0.921571	1.21911
858	Smar_temp_001298:	2532	0	319	859	525	829	90	81	0	0	329	79	136	220	0	38	0	265	218	173	58	0	344	121	114	109	0	0	156	0	0	1.22461	1.18042	0.763572	1.05338	0.942241	1.23519	0.826776	0.876883	0.907558	1.11806	0.94551	0.75639	0.615123	1.26825	1.04363	1.21213
859	Smar_temp_010683:	1719	0	253	526	355	585	70	74	0	0	261	66	90	122	0	38	0	160	121	130	65	0	199	74	77	73	0	0	98	0	0	1.41631	1.2364	0.828522	0.994627	0.893829	1.12311	0.954811	1.24406	0.811181	0.955876	1.02051	0.766555	0.726236	1.00156	0.847856	1.31101
860	Smar_temp_007209:	6045	0	819	2101	1160	1965	214	135	0	0	846	261	395	435	0	98	0	548	416	458	201	0	883	325	274	245	0	0	310	0	0	0.85899	1.20922	0.979737	0.96258	0.802395	1.07895	0.961378	1.27894	0.822124	1.14175	0.883191	0.980371	0.670615	1.10324	0.920271	1.32447
861	Smar_temp_007785:	2749	0	470	866	485	928	104	92	0	0	385	125	117	151	0	95	0	271	172	211	83	0	345	158	132	160	0	0	147	0	0	1.10949	1.26461	0.765775	0.891524	0.926997	0.988307	1.21542	1.00095	0.897847	1.06713	1.18223	0.787842	0.721758	1.05054	1.00844	1.22897
862	Smar_temp_004953:	45699	426	6641	14358	8113	16161	1685	1373	0	0	7329	1749	1903	2520	424	1140	1	4544	3152	3530	1368	0	5926	2379	1985	2148	0	1	2539	2	0	1.16456	1.31365	0.746569	0.951349	0.894917	0.988626	1.16989	1.16032	0.884952	1.14018	1.18126	0.744723	0.695215	1.09861	0.914617	1.28237
863	Smar_temp_003293:	2952	0	467	894	660	931	155	91	0	0	314	140	193	199	0	85	0	267	221	261	96	0	282	151	151	135	0	0	210	0	0	0.871559	1.04157	0.965589	1.06767	0.946979	0.995607	1.05041	0.919447	1.00889	1.06767	1.15054	0.950556	0.925699	1.06173	0.916608	1.06942
864	Smar_temp_010033:	17055	40	3042	5866	2810	5297	573	359	0	1	2189	772	885	927	38	695	2	1578	993	1286	554	1	2437	1216	965	827	0	0	756	0	0	0.716276	1.20788	0.915686	0.922312	0.866137	0.959142	1.23764	1.10534	0.866238	1.16221	1.28091	0.817109	0.705863	1.1378	0.875322	1.33057
865	Smar_temp_002523:	4788	0	823	1478	1024	1463	234	263	0	0	598	186	225	310	0	118	0	393	301	299	194	0	614	255	246	265	0	0	286	0	0	1.4942	1.34578	0.711807	0.968311	0.870218	0.980712	1.06849	1.10219	0.914062	1.00374	0.834135	0.739644	0.662074	0.962003	1.05379	1.33772
866	Smar_temp_011415:	1471	0	221	471	266	513	46	28	0	0	199	74	79	73	0	30	0	146	113	126	54	0	184	88	62	75	0	0	93	0	0	0.700643	1.22008	0.92755	0.876176	0.888848	0.857103	0.956329	1.35124	1.00253	1.2436	0.903544	0.96014	0.767088	1.21813	0.973115	1.11232
867	Smar_temp_009132:	6380	0	1161	2215	1053	1951	161	198	0	0	723	320	282	326	0	220	0	605	412	524	263	0	942	422	386	292	0	0	303	0	0	1.0333	1.22497	0.771379	0.957639	0.893192	0.891736	0.926381	1.37251	0.940974	1.04695	1.04131	0.901324	0.773608	1.27948	0.822459	1.21184
868	Smar_temp_003919:	1965	0	319	664	375	607	79	28	0	0	244	85	115	118	0	46	0	173	153	127	73	0	258	160	117	83	0	0	105	0	0	0.459937	1.14986	0.90753	1.0854	0.843436	0.931205	1.10389	1.19912	0.906425	1.48431	0.888258	0.862585	0.619169	1.32079	0.842289	1.30129
869	Smar_temp_010449:	1100	0	175	364	192	369	33	33	0	0	165	37	49	57	0	30	0	109	77	83	45	0	149	75	56	44	0	0	57	0	0	1.08036	1.23702	0.771234	0.967033	0.892671	0.89715	0.984701	1.47321	0.884993	1.29513	1.07755	0.630275	0.67974	1.19552	0.749516	1.33298
870	Smar_temp_009105:	667	0	97	231	120	219	18	24	0	0	108	16	49	48	0	21	0	60	29	53	19	0	93	36	28	29	0	0	35	0	0	1.37526	1.16248	1.17904	0.83349	0.791081	1.15498	0.83375	1.08875	0.888318	1.07163	1.48868	0.502377	0.698788	0.736035	0.910559	1.50197
871	Smar_temp_011898:	13064	20	2489	3976	2411	4168	471	409	0	1	1634	712	644	710	19	479	0	1123	887	901	531	0	1475	889	733	746	0	0	698	0	1	0.890384	1.21892	0.877644	0.967629	0.885282	0.967589	1.05853	1.15598	0.907417	1.17356	1.01009	0.89661	0.710276	1.15312	0.939426	1.22878
872	Smar_temp_008456:	3339	0	502	1119	624	1094	116	105	0	0	430	142	183	231	0	78	0	345	220	272	100	0	438	177	152	172	0	0	177	0	0	1.11923	1.16797	0.87509	0.903496	0.940997	1.10462	0.99473	1.06593	0.865741	1.0521	1.03348	0.863344	0.741887	1.07606	1.04574	1.19964
873	Smar_temp_007376:	783	0	103	262	130	288	19	24	0	0	131	23	30	55	0	17	0	98	57	70	20	0	97	39	36	30	0	0	36	0	0	1.40344	1.10645	0.689665	1.04454	1.01694	1.26439	0.880296	1.16953	0.752885	1.13159	1.25469	0.6071	0.726384	1.19207	0.791869	1.23665
874	Smar_temp_005849:	1084	0	178	335	240	331	61	55	0	0	146	35	50	92	0	31	0	102	74	55	39	0	130	57	52	56	0	0	48	0	0	1.3956	1.25569	0.674129	0.945296	0.997141	1.2404	1.14799	0.989607	0.654985	1.03619	1.0606	0.643946	0.537674	1.00977	1.03031	1.44453
875	Smar_temp_011400:	1259	0	239	395	247	378	45	65	0	0	150	63	65	84	0	40	0	98	72	72	52	0	168	71	63	84	0	0	66	0	0	1.38626	1.35563	0.838774	0.840178	0.826348	1.08395	0.928633	1.10901	0.889981	0.946867	0.881637	0.877964	0.607113	0.970889	1.17062	1.3217
876	Smar_temp_011380:	20854	41	3321	6184	4029	7279	873	930	0	3	3756	633	991	1364	38	601	3	1867	1235	1304	772	0	2358	1157	967	981	0	0	1020	0	0	1.44946	1.28586	0.829462	0.981923	0.864953	1.14166	1.12153	1.20321	0.725305	1.17486	1.13639	0.546075	0.604124	0.878188	0.846287	1.47833
877	Smar_temp_008956:	7272	0	1092	2524	1316	2340	234	146	0	0	915	296	422	507	0	177	0	750	514	593	196	0	950	473	401	318	0	0	379	0	0	0.738802	1.08442	0.923892	1.058	0.923443	1.10998	0.982557	0.991817	0.894996	1.24797	1.0794	0.842378	0.730135	1.21379	0.904987	1.21519
878	Smar_temp_003045:	3119	0	538	1039	619	923	121	102	0	0	353	136	195	221	0	97	0	302	201	212	144	0	402	203	140	157	0	0	132	0	0	0.955306	1.16148	0.945679	0.78117	0.982212	1.07177	0.984962	1.34867	0.720604	1.1327	1.04526	0.854221	0.6895	1.09728	0.986123	1.29237
879	Smar_temp_009978:	19283	40	2779	6187	3431	6846	702	594	0	1	3127	712	889	1127	38	482	1	1969	1245	1515	564	0	2553	991	775	958	1	0	1037	0	1	1.2013	1.28607	0.807561	0.869176	0.896403	1.02376	1.14993	1.14063	0.851326	1.11142	1.2035	0.721654	0.689716	1.02208	0.97099	1.28656
880	Smar_temp_009589:	378	0	76	110	97	95	20	30	0	0	36	11	26	35	0	17	0	27	21	13	21	0	43	18	13	25	0	0	21	0	0	1.53825	1.34331	0.921087	0.587799	0.976651	1.23993	0.803486	1.07678	0.861422	0.813876	1.11253	0.5759	0.470239	0.861422	1.30886	1.50781
881	Smar_temp_001931:	2698	0	581	765	650	702	150	98	0	0	213	129	212	176	0	145	0	187	190	157	151	0	222	209	143	142	0	0	173	0	0	0.70013	1.02346	1.15028	0.868041	0.939475	0.954948	0.95787	1.07877	1.02291	1.26868	1.15893	0.853333	0.788757	1.12343	0.939328	1.16613
882	Smar_temp_010037:	1174	0	212	384	191	387	25	22	0	0	148	54	67	63	0	49	0	117	77	95	36	0	139	87	61	66	0	0	67	0	0	0.637854	1.10668	1.07245	0.879692	0.924297	1.00843	0.804528	1.04376	1.06414	1.25464	1.27995	0.772707	0.750498	1.22297	0.94442	1.16013
883	Smar_temp_004970:	2212	0	335	678	408	791	76	59	0	0	353	107	109	141	0	62	0	216	164	188	76	0	241	107	111	86	0	0	115	0	0	0.954843	1.15969	0.871609	1.08102	0.890908	1.12749	1.0099	1.22997	0.788218	1.04206	1.22204	0.893198	0.77542	1.12407	0.717897	1.24798
884	Smar_temp_001035:	19309	0	2637	6409	3503	6760	592	470	0	0	2948	863	1061	1199	0	345	0	1888	1380	1610	651	0	2640	959	820	821	0	0	1061	0	0	0.982443	1.24103	0.912525	0.936857	0.841443	1.03121	0.931539	1.36079	0.865144	1.09567	0.957985	0.934789	0.717544	1.12526	0.889296	1.24564
885	Smar_temp_005914:	1678	0	287	516	351	524	84	30	0	0	180	102	102	106	0	57	0	137	135	133	57	0	179	98	97	76	0	0	104	0	0	0.499717	1.12809	0.945008	1.09909	0.85022	0.982067	1.14408	0.949462	0.948827	1.11042	1.16119	1.1381	0.825396	1.23165	0.847993	1.10002
886	Smar_temp_003311:	5777	0	1043	1854	1015	1865	178	212	0	0	715	289	281	316	0	181	0	537	344	449	197	0	728	361	308	357	0	0	323	0	0	1.15688	1.22353	0.862647	0.920151	0.897198	0.970094	0.998137	1.07502	0.985735	1.07849	0.961197	0.858296	0.750171	1.04982	1.06025	1.18755
887	Smar_temp_007260:	1547	0	345	565	263	374	51	57	0	0	96	62	78	99	0	74	0	150	77	113	47	0	200	152	136	88	0	0	66	0	0	0.97183	0.969222	0.812046	1.07935	1.09815	1.03067	1.14064	0.801334	1.03802	1.20633	0.961798	0.743347	0.827273	1.21103	1.05507	1.06174
888	Smar_temp_011602:	1538	0	294	531	255	458	42	75	0	0	171	51	70	100	0	49	0	168	68	117	45	0	194	119	98	102	0	0	68	0	0	1.53862	1.0582	0.795096	0.965474	1.06244	1.13585	0.993403	0.923169	0.895488	1.17236	0.871882	0.582524	0.739916	0.895488	1.16505	1.25378
889	Smar_temp_001951:	1750	0	336	575	303	536	36	59	0	0	197	80	79	88	0	58	0	182	129	129	102	0	218	139	95	81	0	0	77	0	0	1.01416	1.15388	0.793514	0.860507	1.03342	0.883914	0.686207	1.7533	0.829701	1.25906	0.899058	0.777363	0.732479	1.39002	0.78708	1.19998
890	Smar_temp_003733:	2906	0	531	1017	491	867	77	112	0	0	319	121	149	172	0	104	0	301	152	252	116	0	399	194	167	144	0	0	126	0	0	1.24835	1.12105	0.86712	0.898662	0.992024	1.00097	0.928161	1.29294	0.860133	1.04396	1.07186	0.763778	0.830531	1.03762	0.908959	1.23324
891	Smar_temp_000826:	543	0	85	192	111	155	17	20	0	0	50	24	31	38	0	11	0	52	43	41	26	0	82	30	27	21	0	0	29	0	0	1.15103	1.20785	0.789837	0.898346	0.94879	0.968187	0.749209	1.49634	0.915257	0.998162	0.826713	0.989146	0.748085	1.35711	0.865503	1.13007
892	Smar_temp_001666:	534	0	103	135	146	150	37	29	0	0	45	22	34	45	0	20	0	48	46	28	28	0	29	32	24	31	0	0	35	0	0	1.02979	0.849712	0.921157	0.921683	1.26578	1.21918	0.926909	0.994281	0.853425	1.22891	1.00669	0.760388	0.73837	1.12164	1.07146	1.068
893	Smar_temp_000143:	1567	0	239	482	258	588	42	33	0	0	250	87	64	73	0	39	0	161	118	149	52	0	180	80	77	71	0	0	90	0	0	0.83862	1.21408	0.806459	1.04741	0.890165	0.919867	0.988733	1.32146	0.929639	1.08821	1.06989	0.970092	0.823817	1.21886	0.791684	1.13306
894	Smar_temp_005526:	35886	20	5430	11800	6546	12090	1350	1170	0	0	5383	1328	1694	2158	19	954	1	3440	2332	2682	1099	0	4980	1978	1685	1692	0	0	1939	1	0	1.18123	1.28348	0.78701	0.94372	0.865317	1.00258	1.13059	1.10955	0.879226	1.10782	1.16111	0.725934	0.674645	1.05743	0.92491	1.32159
895	Smar_temp_007237:	1564	0	276	467	305	516	61	88	0	0	196	70	63	104	0	37	0	159	93	120	48	0	161	81	84	107	0	0	91	0	0	1.63497	1.15459	0.691768	1.01927	1.03197	1.14197	1.02557	0.891803	0.904333	0.982869	0.759662	0.768734	0.778846	0.924209	1.17506	1.15131
896	Smar_temp_003810:	992	0	184	346	178	284	24	29	0	0	97	50	56	72	0	34	0	97	69	76	42	0	126	71	66	42	0	0	40	0	0	0.878359	1.04407	0.901994	1.0284	0.97924	1.15971	0.75142	1.27211	0.784934	1.10631	0.996219	0.949173	0.767239	1.35401	0.797306	1.19302
897	Smar_temp_012149:	576	0	98	177	159	142	45	38	0	0	50	21	46	58	0	13	0	40	30	32	25	0	60	26	30	30	0	0	31	0	0	1.4047	1.10313	0.941477	0.996195	0.916687	1.18708	1.02528	0.924143	0.790858	0.863369	0.779675	0.869215	0.733349	0.765347	1.24174	1.42829
898	Smar_temp_002826:	544	0	77	191	93	183	17	20	0	0	84	10	19	29	0	11	0	56	37	47	14	0	78	36	37	15	0	0	33	0	0	1.51934	1.16313	0.581884	1.3686	0.87157	0.888138	1.06926	1.06354	1.05482	1.33161	1.00928	0.386062	0.731497	1.18268	0.579093	1.36451
899	Smar_temp_010590:	761	0	88	267	135	271	28	10	0	0	112	26	38	44	0	12	0	86	58	64	16	0	119	40	23	37	0	0	47	0	0	0.640572	1.27031	0.802275	0.744935	0.904487	0.92895	1.16916	1.02492	0.977641	1.29554	1.17924	0.829671	0.673107	1.20645	1.18069	1.16055
900	Smar_temp_010045:	6615	40	927	2222	1148	2278	171	269	0	1	1062	166	199	532	38	153	1	763	509	381	159	1	969	339	290	324	0	0	286	0	1	1.67209	1.29827	0.516056	0.931331	0.997141	1.37961	0.858306	0.988338	0.723436	1.08869	1.17777	0.520001	0.497917	1.28751	1.01494	1.35378
901	Smar_temp_010147:	6345	0	972	1856	1216	2301	237	231	0	0	1058	224	273	385	0	177	0	612	475	459	187	0	671	340	299	309	0	0	407	0	0	1.24006	1.23594	0.767508	1.05162	0.909261	1.08238	1.01698	1.00386	0.922945	1.19582	1.1887	0.635472	0.681946	1.07715	0.876612	1.2679
902	Smar_temp_006816:	7799	0	1153	2463	1451	2732	298	236	0	0	1194	296	386	470	0	192	0	793	531	640	234	0	924	429	359	367	0	0	449	0	0	1.10016	1.18791	0.842354	0.985915	0.919109	1.02566	1.10388	1.09083	0.883359	1.17816	1.12637	0.732859	0.741778	1.04468	0.908647	1.24762
903	Smar_temp_013029:	4213	0	680	1469	951	1113	142	216	0	0	346	165	276	413	0	108	0	386	317	236	180	0	628	191	178	214	0	0	216	0	0	1.4072	1.22605	0.832335	0.750725	0.994631	1.24549	0.661483	1.17267	0.859745	0.805553	0.984005	0.918483	0.608116	1.26176	1.19125	1.17673
904	Smar_temp_003077:	19239	0	3172	6240	3443	6384	608	588	0	0	2524	881	1028	1124	0	516	0	1921	1218	1592	653	0	2338	1186	953	1050	0	0	1058	0	0	1.03583	1.1552	0.920564	0.926313	0.927753	1.00653	0.986761	1.15034	0.926058	1.15279	0.986656	0.837013	0.768861	1.0661	0.997575	1.19148
905	Smar_temp_012451:	8695	0	1465	3051	1531	2648	276	222	0	0	949	328	490	571	0	314	0	947	543	716	260	0	1164	600	450	440	0	0	424	0	0	0.860617	1.08727	0.912112	0.875391	1.0192	1.06289	1.02383	1.00793	0.909373	1.16719	1.27211	0.73517	0.770588	1.1646	0.986204	1.17679
906	Smar_temp_010435:	4002	0	664	1291	633	1414	119	83	0	0	578	207	153	188	0	113	0	435	277	339	131	0	503	261	200	220	0	0	194	0	0	0.790284	1.20779	0.74927	0.933712	0.953654	0.920672	1.18855	1.24732	0.867413	1.21849	1.0257	0.882328	0.743192	1.23852	0.93774	1.15693
907	Smar_temp_006226:	1284	0	230	478	248	328	47	77	0	0	127	36	75	109	0	48	0	117	49	81	44	0	218	69	67	71	0	0	48	0	0	1.73331	1.22508	0.812357	0.7825	0.958185	1.18062	0.981204	0.990463	0.757671	0.805858	1.16507	0.612725	0.663359	0.773456	1.20843	1.51573
908	Smar_temp_012491:	1012	0	128	319	183	382	27	26	0	0	186	33	60	59	0	22	0	97	70	83	31	0	129	47	32	43	0	0	66	0	0	1.12329	1.28289	1.04014	0.793103	0.805561	1.0228	0.81591	1.33931	0.955454	1.16487	1.35889	0.683001	0.689294	1.01336	0.889971	1.28993
909	Smar_temp_012726:	402	0	52	92	102	156	27	6	0	0	67	21	18	29	0	8	0	36	51	21	14	0	24	17	13	17	0	0	32	0	0	0.454751	1.13989	0.7711	1.09239	1.00836	1.24233	1.04325	1.06109	0.808446	1.42851	1.18935	1.04068	0.588211	1.28846	0.842456	1.10676
910	Smar_temp_009258:	8368	20	1425	2796	1493	2634	272	331	0	0	1089	314	382	498	19	278	0	810	507	618	301	0	1177	502	426	420	0	0	421	1	1	1.30189	1.25986	0.765752	0.894704	0.920352	0.998284	1.02111	1.1839	0.895835	1.05432	1.14561	0.700036	0.702194	1.07883	0.936355	1.31346
911	Smar_temp_013165:	2239	0	365	789	350	735	54	77	0	0	308	93	93	110	0	62	0	232	125	190	84	0	356	133	107	112	0	0	102	0	0	1.34953	1.28041	0.754036	0.831894	0.895731	0.89187	0.986988	1.47222	0.887767	1.03404	1.04198	0.77617	0.733573	1.08795	0.934742	1.27653
912	Smar_temp_012884:	643	0	86	271	152	134	30	25	0	0	38	17	56	69	0	9	0	53	41	27	26	0	139	35	23	28	0	0	26	0	0	1.22973	1.21699	0.87415	0.634558	0.938453	1.07708	0.83492	1.27892	0.820797	0.965631	0.78245	0.948542	0.47808	1.29433	1.5623	1.36077
913	Smar_temp_009415:	4514	0	596	1351	889	1678	224	109	0	0	788	200	211	264	0	107	0	394	344	327	105	0	580	180	165	219	0	0	296	0	0	0.928624	1.43443	0.793025	0.925005	0.784532	0.992221	1.2794	0.894546	0.895694	1.0091	1.35973	0.902721	0.651121	1.04094	0.988479	1.26329
914	Smar_temp_007792:	11574	0	1888	3624	2041	4021	468	343	0	0	1809	544	550	665	0	389	0	1077	680	875	317	0	1471	612	525	657	0	0	591	0	0	1.03023	1.29634	0.860627	0.888081	0.855415	1.04058	1.3003	0.952133	0.833478	1.03525	1.26307	0.829366	0.694975	0.958993	1.00164	1.29495
915	Smar_temp_005880:	18040	0	3417	5767	3090	5766	526	838	0	0	2317	843	739	1059	0	663	0	1711	986	1267	610	0	2368	1073	948	1196	0	0	895	0	0	1.43178	1.28445	0.748122	0.867861	0.928244	1.07207	0.993814	1.04223	0.906205	0.982294	1.02438	0.771871	0.687367	0.998344	1.09509	1.25723
916	Smar_temp_005842:	1836	0	281	638	361	556	65	82	0	0	211	55	94	144	0	35	0	207	120	129	68	0	255	109	82	96	0	0	83	0	0	1.48413	1.1502	0.749329	0.839768	1.07139	1.14791	0.915739	1.23074	0.759222	1.11628	0.813819	0.64633	0.667678	1.09767	1.12814	1.25316
917	Smar_temp_000473:	11240	23	2024	3471	2052	3670	431	351	0	0	1434	522	519	590	21	475	1	1120	751	893	436	0	1309	676	522	591	0	0	594	2	1	0.949917	1.22123	0.819034	0.835164	0.988243	0.931079	1.15051	1.17995	0.886562	1.08155	1.30328	0.789878	0.787947	1.12089	0.894288	1.19669
918	Smar_temp_012986:	598	0	82	223	110	183	15	18	0	0	78	18	37	55	0	13	0	65	40	39	18	0	95	33	25	26	0	0	22	0	0	1.19335	1.14239	0.901998	0.817565	0.952486	1.34081	0.741322	1.19335	0.653552	1.07919	1.15616	0.717313	0.571492	1.18828	1.03612	1.39282
919	Smar_temp_000871:	7572	0	1350	2429	1311	2482	238	244	0	0	967	384	353	385	0	234	0	733	476	605	289	0	951	488	392	434	0	0	398	0	0	1.04391	1.2205	0.839373	0.905181	0.92063	0.915464	1.04853	1.23644	0.926167	1.12686	0.972207	0.867773	0.759865	1.10768	0.980765	1.18859
920	Smar_temp_013090:	2888	0	607	853	603	825	121	218	0	0	368	93	128	217	0	113	0	238	136	138	139	0	314	183	173	182	0	0	126	0	0	1.72008	1.24632	0.718689	0.964952	0.976722	1.2184	0.961054	1.09675	0.73147	1.02073	0.885724	0.536337	0.566335	0.789523	1.04961	1.56148
921	Smar_temp_012984:	6805	0	1027	2398	1133	2247	173	139	0	0	913	296	375	401	0	170	0	698	446	590	219	0	985	422	339	298	0	0	340	0	0	0.81291	1.16564	0.939248	0.936717	0.881518	1.00437	0.917095	1.28077	0.908812	1.16606	1.09682	0.872863	0.745123	1.19215	0.878761	1.23053
922	Smar_temp_001018:	697	0	122	218	167	190	35	28	0	0	76	31	60	59	0	18	0	46	44	39	36	0	74	45	37	31	0	0	37	0	0	0.957888	1.0853	1.14871	0.969657	0.77407	1.12957	0.874718	1.23157	0.812764	1.17931	0.842919	0.93214	0.656277	0.96653	0.93214	1.46737
923	Smar_temp_000126:	26390	68	4314	8812	4391	8805	915	531	0	1	3617	1216	1283	1408	66	835	2	2655	1662	2168	753	0	3503	1732	1370	1356	0	0	1315	1	0	0.739759	1.1905	0.87504	0.951054	0.903026	0.960294	1.25237	1.04904	0.897578	1.20235	1.18404	0.844819	0.737386	1.13443	0.942084	1.2312
924	Smar_temp_009901:	30852	91	4647	9672	5802	10640	1116	794	0	1	4468	1481	1597	1847	89	755	0	2889	2295	2416	1038	1	3793	1616	1392	1461	0	1	1800	0	1	0.90856	1.25093	0.877999	0.955506	0.86611	1.01544	1.0228	1.18776	0.899573	1.10927	1.07866	0.924111	0.724306	1.14696	0.911631	1.21762
925	Smar_temp_012251:	4295	0	824	1339	827	1305	181	199	0	0	513	195	198	267	0	145	0	385	248	265	166	0	522	285	234	279	0	0	212	0	0	1.25425	1.25047	0.767966	0.910901	0.946309	1.03559	1.13666	1.04626	0.84369	1.10943	0.917227	0.778861	0.651355	0.986958	1.11437	1.29378
926	Smar_temp_007813:	7610	0	1269	2411	1355	2575	234	278	0	0	1159	288	420	431	0	279	0	679	423	598	240	0	958	424	354	395	0	0	449	0	0	1.23035	1.25417	0.978357	0.880499	0.8323	1.00398	0.969889	1.06217	0.979297	1.05461	1.31846	0.670715	0.733013	0.922589	0.919905	1.33019
927	Smar_temp_003052:	2908	0	521	857	519	1011	97	108	0	0	428	166	129	149	0	74	0	247	185	207	102	0	327	173	154	191	0	0	170	0	0	1.16148	1.29473	0.843405	1.00299	0.829009	0.974165	1.0472	1.09696	0.94216	1.12674	0.792776	0.91646	0.694757	1.02529	1.05448	1.21769
928	Smar_temp_010541:	963	0	172	303	227	261	32	69	0	0	81	32	58	100	0	24	0	90	68	52	37	0	103	47	51	60	0	0	58	0	0	1.70185	1.08038	0.812056	0.942379	1.09594	1.4001	0.598032	0.912586	0.942731	0.868466	0.781233	0.686447	0.633208	1.10527	1.28709	1.14507
929	Smar_temp_002694:	3047	0	609	939	506	993	113	149	0	0	453	131	117	144	0	158	0	292	127	245	132	0	379	171	150	168	0	0	117	0	0	1.4733	1.30973	0.750313	0.799247	0.954202	0.923462	1.34478	1.3052	0.70951	0.911141	1.29806	0.660051	0.800615	0.770152	0.846477	1.39982
930	Smar_temp_008932:	1807	0	304	610	356	537	95	35	0	0	200	57	91	117	0	85	0	207	135	137	71	0	228	127	83	65	0	0	73	0	0	0.58439	1.10722	0.757216	0.808785	1.14189	0.973563	1.35451	1.18548	0.690012	1.23754	1.662	0.630936	0.755744	1.27605	0.719488	1.25326
931	Smar_temp_008098:	2247	0	402	789	355	701	69	83	0	0	274	95	95	125	0	81	0	237	108	197	66	0	323	143	133	122	0	0	95	0	0	1.30685	1.16587	0.762116	0.942219	0.962845	1.00278	1.23026	1.03918	0.857789	1.01306	1.12625	0.7575	0.80034	0.97517	0.972789	1.2529
932	Smar_temp_007766:	5317	0	885	1785	1012	1635	203	222	0	0	666	207	280	352	0	158	0	484	307	379	179	0	756	298	265	283	0	0	277	0	0	1.31794	1.26157	0.824149	0.891931	0.881771	1.03607	1.05391	1.06266	0.890119	1.003	1.0726	0.760634	0.690478	0.986522	1.0399	1.32466
933	Smar_temp_000817:	5899	0	1045	2008	944	1902	165	179	0	0	764	291	298	279	0	176	0	559	302	485	213	0	846	398	305	351	0	0	287	0	0	1.07039	1.23772	0.927383	0.857429	0.863408	0.868254	1.09224	1.27371	0.942926	1.11887	0.950733	0.863664	0.749111	0.992208	1.04174	1.24581
934	Smar_temp_007578:	801	0	168	197	175	261	39	39	0	0	95	48	21	38	0	28	0	67	76	44	47	0	61	53	47	46	0	0	51	0	0	1.06255	1.25901	0.487919	1.13751	1.04376	0.882901	1.02005	1.28051	0.894384	1.28272	0.794643	0.876847	0.685454	1.33281	0.840312	1.11706
935	Smar_temp_010819:	10246	0	1469	3421	1768	3588	361	199	0	0	1567	415	524	594	0	253	0	1090	684	874	297	0	1350	602	456	463	0	0	516	0	0	0.785061	1.1819	0.887667	0.929703	0.909862	1.00625	1.18331	1.17167	0.83343	1.22737	1.20124	0.80673	0.729559	1.10478	0.900039	1.24715
936	Smar_temp_007596:	11320	41	2030	3863	1849	3537	392	306	0	0	1516	510	493	580	38	436	0	1036	658	805	402	0	1698	777	634	558	0	1	474	3	2	0.922858	1.28806	0.781325	0.915198	0.858314	0.919206	1.29795	1.21238	0.820451	1.12162	1.19768	0.804055	0.666934	1.13894	0.87973	1.37175
937	Smar_temp_011490:	2557	0	367	688	393	1109	76	96	0	0	598	106	104	105	0	44	0	269	117	252	76	0	211	120	104	142	0	0	136	0	0	1.70194	1.13982	0.98352	1.0532	0.901494	0.992977	1.25823	1.34737	0.797895	1.21523	0.835317	0.665946	0.844523	0.686424	0.892116	1.24328
938	Smar_temp_000521:	606	0	175	166	132	133	25	38	0	0	33	40	32	33	0	33	0	34	37	15	48	0	53	64	46	48	0	0	26	0	0	0.996883	1.16555	0.884995	0.959587	0.933237	0.912651	0.86949	1.25922	0.897471	1.33508	0.652996	1.04146	0.411722	1.27717	1.24975	1.13053
939	Smar_temp_004273:	2211	0	309	821	534	547	138	59	0	0	180	79	196	229	0	47	0	187	141	150	66	0	317	124	120	76	0	0	101	0	0	0.790571	1.03983	0.988463	1.04585	0.920661	1.15489	1.07	0.884368	0.764507	1.08071	1.08835	1.0334	0.738498	1.06728	0.994161	1.33011
940	Smar_temp_013020:	467	0	91	150	97	129	15	26	0	0	40	23	27	32	0	16	0	43	29	34	27	0	57	26	22	26	0	0	23	0	0	1.37555	1.18307	0.866598	0.752674	1.03778	1.02708	0.7445	1.42846	0.858387	0.889524	0.902306	0.914984	0.820568	1.08231	1.03433	1.12253
941	Smar_temp_008206:	1012	0	186	267	229	330	58	62	0	0	159	36	45	67	0	33	0	79	64	43	48	0	101	55	42	63	0	0	56	0	0	1.47307	1.43377	0.744811	0.855866	0.907366	1.10894	1.11928	1.14044	0.749927	1.12078	0.965314	0.593548	0.493883	0.85706	1.03871	1.47758
942	Smar_temp_002992:	2857	0	436	981	562	878	128	86	0	0	313	123	141	196	0	56	0	300	206	220	96	0	394	171	145	139	0	0	142	0	0	1.00273	1.16968	0.730675	0.968552	0.995103	1.01569	1.15784	1.11933	0.822182	1.14222	0.841638	0.917982	0.729742	1.19274	1.03739	1.16002
943	Smar_temp_006200:	3880	0	721	1152	917	1090	197	112	0	0	381	182	324	289	0	157	0	299	284	221	203	0	371	270	157	204	0	0	228	0	0	0.657272	1.08468	1.19002	0.733405	0.923898	1.06147	0.90899	1.19131	0.885056	1.26127	1.17182	0.898548	0.682881	1.10244	1.00716	1.24424
944	Smar_temp_006949:	6383	0	934	1946	1137	2366	212	173	0	0	1071	306	308	322	0	115	0	599	443	552	212	0	732	340	307	300	0	0	390	0	0	1.03983	1.23382	0.88853	1.07814	0.830413	0.928918	1.04674	1.27425	0.925368	1.19403	0.841451	0.883862	0.765255	1.05112	0.866532	1.22119
945	Smar_temp_009692:	3436	0	690	1070	629	1047	131	196	0	0	429	147	158	190	0	120	0	308	144	227	145	0	426	227	177	247	0	0	163	0	0	1.55171	1.27848	0.806633	0.823746	0.944655	0.970001	1.13769	1.14795	0.85044	1.05644	0.866037	0.699157	0.696223	0.751309	1.17477	1.34467
946	Smar_temp_000782:	3467	0	551	1193	562	1161	108	95	0	0	471	162	169	169	0	91	0	343	190	316	100	0	504	203	176	184	0	0	185	0	0	1.06363	1.22773	0.873904	0.92827	0.858569	0.873904	1.18551	1.11961	0.983008	1.07068	1.03918	0.877981	0.790985	1.00958	0.997213	1.21146
947	Smar_temp_011448:	1541	0	210	517	297	517	52	55	0	0	223	69	79	130	0	25	0	156	111	121	46	0	204	61	77	62	0	0	69	0	0	1.35891	1.17612	0.792835	1.09291	0.899386	1.30466	0.908433	1.13654	0.692476	0.86581	0.873583	0.979359	0.697601	1.11398	0.880004	1.28566
948	Smar_temp_005680:	1091	0	273	284	192	342	39	40	0	0	102	99	39	44	0	55	0	90	74	64	58	0	96	79	58	102	0	0	51	0	0	0.83257	1.29855	0.780315	0.816153	1.01093	0.880355	1.15422	1.20723	0.847359	1.11166	0.805123	1.15683	0.718886	1.2295	1.19189	0.951421
949	Smar_temp_000423:	9402	0	1468	3257	1602	3075	298	181	0	0	1248	435	516	579	0	241	0	971	607	788	304	0	1279	610	491	432	0	0	421	0	0	0.723619	1.13359	0.9298	0.965513	0.911542	1.04332	1.09172	1.21536	0.803516	1.19952	1.05144	0.906021	0.739748	1.15851	0.899773	1.24092
950	Smar_temp_013075:	12605	0	2015	4101	2220	4269	423	435	0	0	1808	561	558	739	0	314	0	1258	804	973	416	0	1684	704	601	684	0	0	642	0	0	1.22576	1.26213	0.772564	0.916753	0.905748	1.02316	1.08188	1.17222	0.853884	1.07387	0.974815	0.822062	0.700551	1.06935	1.0023	1.25052
951	Smar_temp_008043:	6096	0	972	2100	1136	1888	193	289	0	0	787	190	304	460	0	177	0	608	350	420	179	0	903	316	285	331	0	0	303	0	0	1.59551	1.24823	0.776821	0.851146	0.934818	1.17545	0.911687	0.988219	0.861206	0.943727	1.14205	0.631147	0.645763	0.994793	1.09952	1.34591
952	Smar_temp_007111:	9318	0	1626	3106	1710	2876	351	273	0	0	1088	415	497	554	0	315	0	928	589	733	360	0	1196	622	485	466	0	0	445	0	0	0.91489	1.15518	0.87193	0.894834	0.968011	0.97193	1.1185	1.20645	0.843136	1.1476	1.11018	0.826916	0.764604	1.11597	0.928537	1.22567
953	Smar_temp_006191:	17889	0	2695	5921	3162	6111	564	563	0	0	2615	705	937	1114	0	421	0	1874	1098	1507	567	0	2294	1006	816	890	0	0	917	0	0	1.18188	1.17055	0.8953	0.914792	0.926506	1.06442	1.00912	1.19028	0.848948	1.1278	1.03693	0.76578	0.745061	1.01652	0.96673	1.25266
954	Smar_temp_004166:	3797	0	638	1148	794	1217	182	128	0	0	486	190	232	251	0	102	0	329	252	262	149	0	416	218	170	217	0	0	212	0	0	0.959421	1.19853	0.966421	0.881306	0.894137	1.04557	1.09615	1.11683	0.833039	1.13015	0.951479	0.929144	0.712048	0.990216	1.06118	1.24594
955	Smar_temp_003844:	3366	0	636	1098	676	956	138	119	0	0	326	152	188	221	0	111	0	294	231	207	133	0	415	254	200	192	0	0	184	0	0	0.93166	1.15866	0.852556	0.964017	0.94276	1.00221	1.01648	1.04127	0.958357	1.2243	0.923683	0.841478	0.66378	1.20315	1.06292	1.20065
956	Smar_temp_009498:	3804	0	544	1298	672	1290	128	91	0	0	529	156	188	250	0	90	0	421	265	315	109	0	525	207	164	181	0	0	184	0	0	0.946921	1.18536	0.819888	0.883509	0.956441	1.09028	1.07823	1.13422	0.80742	1.11516	1.15687	0.845622	0.715627	1.16286	0.981139	1.20925
957	Smar_temp_009396:	2623	0	444	817	521	841	117	100	0	0	350	94	128	137	0	87	0	233	176	194	103	0	323	162	133	121	0	0	164	0	0	1.13391	1.26928	0.788767	0.961712	0.88948	0.844227	1.1306	1.16792	0.981767	1.17141	1.15758	0.660309	0.740597	1.0536	0.849972	1.298
958	Smar_temp_000436:	8257	20	1282	2755	1423	2777	204	235	0	0	1188	349	416	477	19	205	0	788	568	635	290	0	1149	493	400	386	0	0	452	1	1	1.06365	1.24997	0.876171	0.935131	0.850454	1.00465	0.831845	1.31258	0.944452	1.15255	1.02991	0.809438	0.685328	1.18683	0.895253	1.272
959	Smar_temp_010191:	7686	0	1374	2450	1471	2391	269	331	0	0	1008	304	386	456	0	257	0	698	485	524	366	0	988	482	377	374	0	0	380	0	0	1.25872	1.2651	0.823207	0.860774	0.91582	0.972493	0.955493	1.39182	0.830408	1.10051	1.04631	0.711226	0.687521	1.05986	0.874995	1.35519
960	Smar_temp_009693:	1561	0	243	452	368	498	90	70	0	0	196	58	80	117	0	42	0	147	128	94	64	0	167	73	57	80	0	0	97	0	0	1.22193	1.27598	0.75077	0.81009	1.01942	1.098	1.03741	1.11719	0.826223	1.03748	1.1103	0.748161	0.651873	1.09027	1.03195	1.23367
961	Smar_temp_002378:	762	0	99	248	138	277	20	9	0	0	118	34	52	43	0	13	0	70	57	67	20	0	94	43	31	35	0	0	55	0	0	0.501976	1.16461	1.15778	0.962121	0.776464	0.957398	0.800252	1.1155	1.09637	1.33456	1.01071	0.944754	0.743187	1.13624	0.972541	1.17186
962	Smar_temp_000594:	9318	0	1641	2761	1594	3322	288	293	0	0	1458	467	403	457	0	330	0	882	610	731	334	0	1021	551	454	523	0	0	515	0	0	1.04374	1.248	0.853244	0.933692	0.896036	0.967574	1.05618	1.1898	0.906237	1.13318	1.14188	0.798236	0.742633	1.07341	0.893956	1.23106
963	Smar_temp_007820:	7140	0	1145	2288	1231	2476	235	248	0	0	1151	288	308	406	0	232	0	663	440	523	215	0	981	377	336	362	0	0	374	0	0	1.25628	1.338	0.780791	0.915748	0.835613	1.02922	1.10726	1.08911	0.876115	1.02749	1.2635	0.725328	0.659164	1.03072	0.911697	1.34052
964	Smar_temp_012185:	3810	0	625	1164	698	1323	132	157	0	0	572	170	139	224	0	110	0	383	270	273	144	0	478	188	163	208	0	0	198	0	0	1.37116	1.34415	0.651826	0.853649	0.947569	1.05042	1.03226	1.25763	0.816911	0.984577	1.0729	0.783311	0.675421	1.11397	0.958404	1.24509
965	Smar_temp_007621:	4939	0	699	1652	830	1758	155	127	0	0	751	209	248	266	0	102	0	536	300	495	147	0	629	261	238	212	0	0	262	0	0	1.08115	1.13833	0.893311	1.01796	0.911538	0.958148	1.11126	1.25141	0.886836	1.11633	1.03106	0.840019	0.841812	1.01546	0.852077	1.20017
966	Smar_temp_006189:	5837	0	845	1935	1004	2053	188	145	0	0	862	223	273	323	0	138	0	621	398	508	145	0	764	339	277	285	0	0	347	0	0	0.997625	1.19103	0.820234	0.988853	0.912455	0.97046	1.08863	0.997625	0.982645	1.21018	1.12812	0.750324	0.74642	1.12707	0.958934	1.19377
967	Smar_temp_001988:	354	0	79	135	74	66	18	15	0	0	10	14	21	30	0	17	0	32	20	18	16	0	53	33	28	18	0	0	10	0	0	0.908313	1.02947	0.744144	0.929395	1.27138	1.06306	1.16362	0.968868	0.724816	1.09536	0.964269	0.950518	0.715152	1.44963	1.22209	0.812672
968	Smar_temp_009219:	6457	0	1151	1946	1329	2031	295	376	0	0	830	247	282	460	0	192	0	604	376	461	224	0	688	336	372	363	0	0	350	0	0	1.58715	1.1731	0.704064	1.0724	0.986768	1.14847	1.07846	0.945537	0.837267	0.968617	0.935796	0.682248	0.753146	0.899464	1.00266	1.29924
969	Smar_temp_001761:	745	0	114	217	156	258	32	15	0	0	99	35	50	41	0	24	0	70	59	62	29	0	73	40	23	38	0	0	54	0	0	0.628374	1.15494	1.10038	0.692659	0.931483	0.90231	0.979619	1.21486	0.999553	1.20462	1.37581	0.886543	0.825028	1.0921	0.962532	1.10803
970	Smar_temp_002478:	2153	0	307	789	398	659	65	72	0	0	278	68	153	169	0	48	0	206	108	168	57	0	332	119	97	105	0	0	107	0	0	1.26869	1.14823	1.049	0.862185	0.853	1.1587	0.883469	1.00438	0.878333	1.05773	1.0965	0.723651	0.69565	0.886542	1.1174	1.37822
971	Smar_temp_001999:	5960	0	1005	1778	1115	2062	228	213	0	0	951	257	287	358	0	206	0	559	387	439	234	0	652	328	280	285	0	0	295	0	0	1.13288	1.22922	0.862823	0.933913	0.908736	1.07627	1.09303	1.24458	0.764724	1.09401	1.21557	0.739137	0.713658	1.00321	0.819665	1.33306
972	Smar_temp_001525:	516	0	89	164	105	158	18	17	0	0	46	27	26	33	0	19	0	49	44	45	18	0	61	25	28	23	0	0	36	0	0	0.938684	1.17029	0.779094	0.98986	0.975764	0.98885	0.842449	0.9939	1.11971	0.883804	1.23772	0.990755	0.89611	1.36854	0.843977	0.950809
973	Smar_temp_012469:	5322	0	851	1721	1010	1740	174	192	0	0	777	170	279	333	0	138	0	526	365	364	236	0	673	351	242	234	0	0	267	0	0	1.18884	1.20928	0.854234	0.879387	0.934825	1.01957	0.907782	1.46129	0.808566	1.27547	1.01413	0.611005	0.646913	1.10534	0.841031	1.36583
974	Smar_temp_007401:	8039	0	1243	2685	1645	2466	350	189	0	0	935	342	495	584	0	196	0	748	611	549	270	0	1035	516	406	371	0	0	441	0	0	0.743065	1.15413	0.900942	0.977941	0.908168	1.06293	1.03977	1.06152	0.87394	1.2429	1.0198	0.896941	0.666557	1.21083	0.972998	1.23603
975	Smar_temp_003718:	40804	21	6521	12556	7701	14005	1464	1439	0	2	6119	1780	1966	2505	19	1059	2	3829	2832	2956	1456	0	4851	2243	1910	2096	0	0	2275	0	0	1.16924	1.25554	0.829636	0.951855	0.888492	1.05709	1.00728	1.18305	0.860704	1.11781	1.01618	0.79529	0.685919	1.07143	0.936476	1.27297
976	Smar_temp_013216:	1433	0	187	438	238	570	45	31	0	0	252	85	64	81	0	19	0	156	98	146	35	0	158	52	59	74	0	0	77	0	0	0.998135	1.1802	0.879782	1.03224	0.89541	1.11347	1.13843	1.12693	0.813364	0.909775	0.778604	1.14274	0.838012	1.03519	0.994859	1.11147
977	Smar_temp_004762:	6098	0	1026	1873	1141	2058	205	189	0	0	851	296	272	342	0	169	0	560	475	402	242	0	756	372	285	330	0	0	351	0	0	0.984501	1.31412	0.776127	0.904372	0.885915	0.975866	0.960218	1.26058	0.911514	1.18044	0.978993	0.854843	0.635961	1.23353	0.953035	1.22525
978	Smar_temp_006057:	324	0	49	106	67	102	10	15	0	0	39	12	21	26	0	13	0	30	21	32	10	0	38	9	16	10	0	0	21	0	0	1.48035	1.09576	0.95804	0.998075	0.899001	1.18614	0.721764	0.986902	0.99561	0.561417	1.75427	0.777911	0.958935	0.99561	0.648259	1.21453
979	Smar_temp_000412:	7094	0	1013	2321	1122	2638	185	126	0	0	1219	324	365	386	0	166	0	718	446	635	173	0	902	397	336	338	0	0	377	0	0	0.786429	1.18781	0.994297	1.01379	0.83189	1.0515	1.0425	1.07978	0.903576	1.19784	1.14757	0.860106	0.735724	1.06895	0.897271	1.24264
980	Smar_temp_001517:	732	0	130	184	170	248	39	28	0	0	94	41	47	49	0	18	0	65	56	51	34	0	40	43	31	47	0	0	48	0	0	0.927421	0.864839	1.09987	0.948662	1.04269	1.14668	0.98782	1.12615	0.833397	1.31589	0.779645	0.930893	0.81811	0.972296	1.06712	1.11876
981	Smar_temp_005766:	1170	0	184	394	222	370	38	44	0	0	140	33	66	74	0	27	0	135	74	103	47	0	136	80	57	53	0	0	62	0	0	1.26028	1.02502	0.882837	0.919913	1.08348	0.989848	0.902118	1.34621	0.883126	1.29111	0.933069	0.567127	0.826657	1.05405	0.91084	1.19649
982	Smar_temp_009165:	2299	0	426	658	580	635	102	180	0	0	235	74	124	245	0	58	0	193	174	77	100	0	221	114	119	149	0	0	133	0	0	1.67484	1.17349	0.746976	0.976001	1.06193	1.47588	0.697081	0.930468	0.830212	0.934993	0.734764	0.628908	0.423672	1.08614	1.26632	1.33986
983	Smar_temp_001701:	1028	0	172	318	224	314	34	23	0	0	101	49	82	58	0	32	0	81	85	86	49	0	105	68	49	42	0	0	83	0	0	0.613684	1.0674	1.1834	0.920945	0.833914	0.83704	0.696588	1.30741	1.21309	1.27805	1.11195	0.932677	0.88539	1.24232	0.799437	1.05307
984	Smar_temp_010450:	838	0	140	269	143	286	26	18	0	0	125	39	40	46	0	28	0	82	59	63	31	0	104	55	42	39	0	0	40	0	0	0.753447	1.20441	0.871396	0.934572	0.893181	1.00211	1.06548	1.2976	0.8196	1.22384	1.19714	0.816234	0.686225	1.20891	0.816234	1.28062
985	Smar_temp_005918:	1782	0	286	615	294	587	55	29	0	0	240	89	96	89	0	45	0	175	114	167	68	0	236	123	108	65	0	0	82	0	0	0.6146	1.11191	0.946142	1.09418	0.863838	0.877153	1.1339	1.44113	0.846713	1.24615	0.980366	0.944699	0.824349	1.17714	0.689949	1.2412
986	Smar_temp_002512:	3169	0	602	990	560	1017	88	206	0	0	444	115	121	193	0	95	0	286	145	185	108	0	426	186	156	243	0	0	171	0	0	1.93644	1.3774	0.691647	0.829498	0.900186	1.10321	0.88926	1.01522	0.951501	0.989016	0.830717	0.595254	0.582288	0.806829	1.2578	1.36039
987	Smar_temp_009490:	42772	80	6461	12875	7600	15756	1529	985	0	3	7097	2132	2077	2282	76	1018	3	4111	3009	3411	1375	1	4856	2326	1831	2235	0	1	2413	0	0	0.85799	1.25298	0.907894	0.941458	0.86679	0.997503	1.13224	1.1977	0.861901	1.19598	1.04306	0.895779	0.719197	1.07479	0.939056	1.22276
988	Smar_temp_008076:	651	0	192	229	95	135	12	40	0	0	32	28	22	37	0	46	0	53	21	22	25	0	92	78	61	60	0	0	21	0	0	1.42763	1.14208	0.658331	0.90318	1.11606	1.10719	0.865596	0.89227	1.06596	1.15489	0.812337	0.703241	0.46327	1.06596	1.50694	1.14305
989	Smar_temp_010272:	5588	0	975	1812	1112	1689	206	246	0	0	665	222	289	404	0	190	0	519	371	381	219	0	710	317	293	272	0	0	283	0	0	1.26789	1.20837	0.801477	0.926747	0.947624	1.1204	0.930924	1.12873	0.841993	1.00266	1.11687	0.753312	0.695654	1.10381	0.922977	1.30262
990	Smar_temp_006238:	2775	0	345	968	446	1016	72	74	0	0	444	90	118	149	0	39	0	324	182	257	67	0	419	142	107	132	0	0	158	0	0	1.33457	1.24087	0.758464	0.889103	0.914195	0.957721	1.00444	1.20833	0.96759	1.17993	0.909263	0.712513	0.725149	1.11457	1.04502	1.1936
991	Smar_temp_000750:	5734	0	803	2030	951	1950	165	116	0	0	771	246	294	315	0	116	0	634	376	585	172	0	804	325	297	218	0	0	299	0	0	0.871003	1.11872	0.87323	1.04473	0.918367	0.935603	1.04612	1.29149	0.924515	1.14322	1.03154	0.90083	0.847389	1.1626	0.798296	1.16263
992	Smar_temp_007051:	24072	53	3789	7310	4431	8489	801	844	1	2	3933	982	1095	1475	51	633	0	2248	1691	1651	830	0	2855	1329	1111	1214	0	1	1324	0	0	1.21012	1.28613	0.81378	0.965571	0.872036	1.09619	0.982067	1.19005	0.847309	1.15504	1.06137	0.734924	0.64045	1.08218	0.908552	1.31378
993	Smar_temp_004520:	2153	0	290	576	326	961	60	58	0	0	532	96	103	85	0	45	0	214	105	230	62	0	169	91	89	94	0	0	119	0	0	1.32086	1.09669	1.18098	1.14713	0.832361	0.974592	1.21551	1.41195	0.817805	1.17291	1.15202	0.741641	0.894594	0.721593	0.72619	1.24025
994	Smar_temp_008393:	10616	0	1857	3585	1687	3487	316	301	0	0	1465	475	430	529	0	374	0	1044	639	841	339	0	1508	707	602	542	0	0	503	0	0	1.02	1.24562	0.754788	0.959967	0.886585	0.928565	1.17874	1.14877	0.907741	1.1274	1.15135	0.778737	0.714193	1.15317	0.88858	1.27907
995	Smar_temp_004067:	5557	0	835	1799	1000	1923	187	111	0	0	797	282	305	287	0	137	0	514	397	452	196	0	754	305	225	277	0	0	330	0	0	0.738715	1.29464	0.942126	0.832349	0.825644	0.886525	1.03916	1.3044	0.953619	1.12829	1.09191	0.975941	0.726053	1.14723	0.958637	1.19768
996	Smar_temp_002149:	13270	0	2098	4199	2201	4772	457	341	0	0	2309	597	565	699	0	350	0	1271	838	978	449	0	1711	810	652	647	0	0	595	0	0	0.979941	1.28774	0.811248	0.982126	0.841725	1.00365	1.25183	1.2903	0.75174	1.22013	1.05518	0.791297	0.647684	1.05875	0.857569	1.34553
997	Smar_temp_000194:	803	0	149	273	161	220	32	12	0	0	67	41	58	59	0	29	0	68	59	52	26	0	94	67	52	42	0	0	44	0	0	0.401684	1.01279	1.05963	1.02653	0.909158	1.0779	0.99132	0.870316	0.997516	1.32264	1.04892	1.00436	0.695238	1.33758	1.02886	1.11159
998	Smar_temp_009697:	6095	308	1191	1722	1376	1498	330	396	1	1	539	223	308	426	307	247	0	415	342	278	300	0	693	324	306	338	0	0	320	0	0	1.47278	1.42443	0.792269	0.90939	0.980566	1.0958	1.06231	1.11574	0.946223	0.962884	1.06132	0.761825	0.656861	1.01128	1.15469	1.46399
999	Smar_temp_007146:	4925	0	820	1612	841	1652	147	126	0	0	682	230	252	268	0	134	0	478	316	418	165	0	596	330	286	235	0	0	261	0	0	0.899843	1.12959	0.915473	1.0656	0.884014	0.973599	1.0236	1.17837	0.925211	1.22954	0.981484	0.8362	0.77305	1.12018	0.854378	1.23075
1000	Smar_temp_001369:	405	0	87	123	93	102	22	14	0	0	29	26	33	33	0	22	0	26	24	21	17	0	43	25	20	28	0	0	21	0	0	0.700779	1.1511	1.16837	0.756939	0.839311	1.16837	1.03018	0.850945	0.896584	0.946173	1.17717	1.18661	0.677905	1.02467	1.27789	1.12889
1001	Smar_temp_005721:	195	0	29	90	36	40	9	1	0	0	10	5	16	15	0	7	0	17	10	14	4	0	44	16	12	6	0	0	8	0	0	0.186782	1.05926	0.962963	0.896552	0.920833	0.902778	1.35417	0.747126	1.08333	1.1954	1.62307	0.840517	0.758333	1.35417	1.00862	1.21875
1002	Smar_temp_002755:	22597	2188	4621	5706	4340	5742	995	1291	2	4	2246	963	1010	1173	2177	1137	5	1396	1043	1065	1038	3	2237	1228	1060	1383	1	2	1132	3	2	1.45463	1.55258	0.921617	0.908425	0.962811	1.07035	1.1937	1.16956	1.02647	1.0524	1.2032	0.820121	0.734523	0.945763	1.17781	1.53934
1003	Smar_temp_002527:	391	0	65	121	56	149	14	11	0	0	74	18	14	18	0	14	0	41	17	35	8	0	45	22	20	23	0	0	16	0	0	1.18159	1.20176	0.807851	0.994278	0.889179	1.03867	1.74554	0.859341	0.74976	1.09371	1.29562	0.726691	0.759055	0.79662	0.928549	1.30327
1004	Smar_temp_007809:	10889	0	1748	3302	2156	3683	396	423	0	0	1567	509	580	685	0	249	0	998	757	816	466	0	1234	567	489	543	0	0	609	0	0	1.22219	1.23239	0.887136	0.922525	0.893593	1.04774	0.927653	1.34643	0.835131	1.06968	0.887369	0.86092	0.730633	1.03809	0.918427	1.25792
1005	Smar_temp_003642:	3261	0	516	1113	565	1067	122	103	0	0	469	132	151	179	0	95	0	320	189	270	118	0	477	186	164	139	0	0	146	0	0	1.1521	1.25568	0.78304	0.931215	0.878701	0.92824	1.24627	1.31988	0.789752	1.05613	1.16352	0.781827	0.741404	1.02235	0.823287	1.34337
1006	Smar_temp_007190:	14338	1	2177	4863	2317	4980	414	571	0	1	2403	499	525	754	0	372	1	1324	807	1064	396	0	2309	735	704	705	0	0	753	0	0	1.62308	1.39992	0.668063	0.953451	0.783868	0.959466	1.1057	1.12564	0.935682	0.995436	1.12542	0.659935	0.629936	1.00278	0.932373	1.38926
1007	Smar_temp_002220:	4692	0	562	1548	794	1788	139	139	0	0	891	125	178	277	0	90	0	499	338	367	105	0	695	208	175	192	0	0	273	0	0	1.46156	1.36082	0.679495	0.943819	0.845902	1.05742	1.0345	1.10405	0.902262	1.1218	1.33699	0.583666	0.622136	1.11709	0.896511	1.30768
1008	Smar_temp_005885:	7271	0	1205	2309	1443	2314	337	289	0	0	923	288	349	467	0	252	0	697	468	530	233	0	935	376	327	393	0	0	406	0	0	1.20848	1.27514	0.761604	0.854537	0.948505	1.01911	1.17677	0.974309	0.884078	0.982587	1.26189	0.750994	0.721245	1.01908	1.02479	1.25334
1009	Smar_temp_001096:	1566	0	266	500	298	502	70	92	0	0	199	57	70	90	0	38	0	151	66	144	43	0	186	79	92	93	0	0	95	0	0	1.81753	1.1651	0.735705	1.08325	0.942096	0.945906	1.2344	0.849498	0.994478	0.93018	0.841031	0.668469	0.898422	0.690901	1.09066	1.23662
1010	Smar_temp_005887:	5225	0	1012	2044	719	1450	89	29	0	0	463	319	316	337	0	201	0	488	285	358	113	0	885	463	354	344	0	0	180	0	0	0.208245	1.1068	1.12348	0.894187	0.860314	1.19814	0.899536	0.811438	0.902115	1.16952	1.02547	1.13587	0.631132	1.42835	1.22489	1.15062
1011	Smar_temp_005573:	1384	0	227	462	238	457	34	55	0	0	180	50	50	88	0	34	0	155	99	113	43	0	172	88	85	65	0	0	72	0	0	1.40895	1.11527	0.629343	1.12173	1.01604	1.10764	0.830732	1.10154	0.916169	1.16132	0.913195	0.667059	0.740724	1.25973	0.867176	1.19282
1012	Smar_temp_009679:	2283	0	346	819	368	750	61	82	0	0	324	90	106	152	0	48	0	243	119	190	63	0	351	126	118	117	0	0	92	0	0	1.47027	1.19466	0.802934	0.950666	0.903165	1.15138	1.02835	1.12959	0.761	1.01512	0.915366	0.791792	0.706178	0.984337	1.02933	1.31501
1013	Smar_temp_001006:	6138	0	1132	2088	1069	1849	192	179	0	0	671	268	301	332	0	216	0	584	397	470	219	0	817	468	386	311	0	0	326	0	0	0.907937	1.15024	0.827723	1.00239	0.92848	0.912971	1.03127	1.11083	1.01235	1.21533	1.03464	0.78592	0.747235	1.23283	0.912019	1.20469
1014	Smar_temp_006709:	6838	0	1005	2321	1157	2355	209	82	0	0	915	324	345	370	0	143	0	739	521	596	201	0	898	456	338	323	0	0	377	0	0	0.482218	1.13987	0.878496	0.990842	0.924501	0.942155	1.0676	1.18202	0.94612	1.33676	0.968129	0.936089	0.745606	1.3075	0.9332	1.12815
1015	Smar_temp_000139:	8017	0	1290	2504	1439	2784	278	144	0	0	1065	419	395	384	0	230	0	782	622	647	258	0	975	497	352	450	0	0	518	0	0	0.621905	1.24666	0.878848	0.873636	0.899322	0.854374	1.0763	1.11425	1.0366	1.23351	1.10805	0.935335	0.744068	1.24472	1.00454	1.1016
1016	Smar_temp_007857:	2027	0	301	659	375	692	78	71	0	0	294	70	100	112	0	44	0	203	126	169	60	0	262	116	93	103	0	0	125	0	0	1.27501	1.22288	0.820233	0.950353	0.902315	0.918661	1.12431	1.07748	0.976397	1.18539	0.984404	0.681207	0.751189	0.984208	1.00235	1.24448
1017	Smar_temp_004779:	11339	0	2136	3653	1948	3602	339	562	0	0	1512	500	480	680	0	382	0	1054	567	759	393	0	1522	692	596	764	0	0	536	0	0	1.53151	1.29327	0.764852	0.866104	0.908285	1.08354	1.01297	1.07097	0.866177	1.00561	0.94937	0.736885	0.654068	0.916274	1.12596	1.32141
1018	Smar_temp_005608:	921	0	154	279	162	326	23	14	0	0	137	57	60	41	0	22	0	77	65	81	43	0	96	61	46	42	0	0	55	0	0	0.516835	1.13585	1.22262	0.986035	0.779702	0.835457	0.807156	1.58742	0.959157	1.30757	0.85436	1.04567	0.820206	1.13355	0.770496	1.18726
1019	Smar_temp_011940:	408	0	77	128	90	113	18	11	0	0	32	22	30	34	0	12	0	40	31	26	18	0	35	32	23	24	0	0	19	0	0	0.647619	0.871582	1.0625	0.95211	1.12832	1.20417	0.906667	1.05974	0.762242	1.32468	0.825772	1.03161	0.733407	1.24366	1.12539	1.02248
1020	Smar_temp_011975:	2593	0	357	898	392	946	53	73	0	0	429	83	100	131	0	37	0	307	166	246	81	0	356	164	134	105	0	0	127	0	0	1.35261	1.14472	0.736614	1.08383	0.937073	0.964965	0.894347	1.50084	0.888033	1.32648	0.75278	0.637267	0.750879	1.16074	0.806181	1.24302
1021	Smar_temp_007381:	3778	0	648	1130	906	1094	233	227	0	0	441	140	223	306	0	111	0	310	223	224	164	0	429	170	167	206	0	0	203	0	0	1.46078	1.26929	0.822925	0.861638	0.947388	1.12922	1.07241	1.05536	0.773771	0.877117	0.9987	0.746101	0.684564	0.850005	1.09783	1.39209
1022	Smar_temp_009753:	786	0	142	220	151	273	23	34	0	0	111	29	29	37	0	21	0	79	65	46	37	0	78	58	33	51	0	0	54	0	0	1.24634	1.26669	0.686153	0.830282	1.03387	0.875436	0.79286	1.35631	1.02962	1.45928	0.818588	0.587989	0.601998	1.23936	1.03405	1.17063
1023	Smar_temp_009463:	13321	0	2232	4312	2320	4457	468	302	0	0	1819	604	723	643	0	436	0	1260	827	1149	434	0	1629	890	700	662	0	0	774	0	0	0.776894	1.16708	0.962739	0.968862	0.873345	0.856212	1.15826	1.11646	0.997119	1.23184	1.16583	0.808792	0.796408	1.0654	0.886458	1.21979
1024	Smar_temp_002516:	2920	370	412	870	379	889	53	118	0	0	418	93	76	138	367	79	1	262	132	204	73	1	404	122	126	133	0	0	115	2	2	2.20662	1.55857	0.673036	1.02645	0.989152	1.22209	1.07741	1.36512	0.996643	0.993862	1.35899	0.741424	0.77018	1.14397	1.06032	1.54439
1025	Smar_temp_002663:	1158	0	166	418	226	348	38	15	0	0	134	53	81	79	0	19	0	99	91	80	47	0	180	79	58	42	0	0	62	0	0	0.463002	1.19297	0.992908	0.967948	0.788113	0.968391	0.86154	1.45074	0.912878	1.31841	0.798447	1.06242	0.636859	1.33987	0.841919	1.28131
1026	Smar_temp_007265:	737	0	126	236	168	207	49	26	0	0	63	27	39	54	0	29	0	78	54	60	26	0	77	44	41	30	0	0	39	0	0	0.905234	1.01891	0.724955	1.01618	1.17674	1.00378	1.27951	0.905234	0.826518	1.09053	1.34625	0.76294	0.905183	1.14441	0.847711	1.0836
1027	Smar_temp_001938:	2849	0	478	992	428	951	67	12	0	0	359	138	139	151	0	77	0	317	210	208	73	0	382	251	154	173	0	0	137	0	0	0.16711	1.10594	0.932721	0.925281	0.957325	1.01324	1.04203	1.01658	0.958934	1.50809	0.960124	0.864894	0.62815	1.4699	1.08425	1.1309
1028	Smar_temp_009502:	27640	467	4240	8638	5015	9280	1011	798	0	2	3986	1186	1332	1583	463	695	3	2568	1874	2084	883	0	3408	1561	1329	1332	0	0	1538	2	1	1.0373	1.26244	0.849881	1.00296	0.885466	1.01003	1.11109	1.14779	0.91343	1.17805	1.06854	0.833123	0.718579	1.11298	0.935682	1.27932
1029	Smar_temp_004772:	9439	0	1532	3136	1500	3271	256	260	0	0	1423	423	421	469	0	264	0	964	563	760	314	0	1321	585	430	524	0	0	461	0	0	1.06795	1.26788	0.844774	0.844811	0.887047	0.941091	1.07395	1.28975	0.88686	1.14934	1.06173	0.796759	0.699331	1.08309	0.987002	1.25536
1030	Smar_temp_007130:	2549	0	493	887	384	785	67	71	0	0	280	112	104	140	0	141	0	275	142	239	59	0	338	169	169	124	0	0	118	0	0	0.955983	1.09506	0.778302	0.985113	1.00672	1.04771	1.1582	0.794408	0.997817	0.985113	1.47875	0.737686	0.874932	1.20076	0.816723	1.15821
1031	Smar_temp_003631:	2200	0	462	722	378	638	66	72	0	0	261	102	116	140	0	118	0	167	124	140	64	0	271	170	167	113	0	0	108	0	0	0.907029	1.14371	0.935086	1.10144	0.797593	1.12855	1.01621	0.806248	0.985222	1.12122	1.21624	0.761308	0.668641	1.13118	0.843409	1.41066
1032	Smar_temp_007617:	1046	0	153	317	159	417	34	20	0	0	194	55	41	41	0	16	0	117	64	98	33	0	115	62	44	60	0	0	51	0	0	0.85995	1.19705	0.850862	0.948929	0.925811	0.850862	1.40675	1.41892	0.804579	1.33713	0.714939	0.90171	0.775465	1.00967	0.983684	1.16697
1033	Smar_temp_013204:	1332	0	174	402	231	525	42	30	0	0	244	54	67	66	0	27	0	143	92	129	39	0	143	63	48	60	0	0	84	0	0	0.994178	1.17866	0.961039	0.91405	0.902516	0.946695	1.04841	1.29243	0.922597	1.19969	1.18787	0.787389	0.814158	1.01046	0.874877	1.17917
1034	Smar_temp_000759:	9530	0	1587	3330	1684	2929	290	320	0	0	1098	399	513	570	0	256	0	945	561	805	338	0	1343	612	528	465	0	0	486	0	0	1.1411	1.1542	0.871814	0.952151	0.923339	0.968682	0.974556	1.20529	0.939005	1.10363	0.968677	0.818031	0.786548	1.08391	0.953344	1.21971
1035	Smar_temp_011697:	3186	0	469	1092	518	1107	90	63	0	0	470	129	167	174	0	90	0	343	198	309	89	0	421	187	160	130	0	0	165	0	0	0.826197	1.12482	0.940611	0.995337	0.904003	0.980037	1.06863	1.16717	0.916753	1.1633	1.30359	0.791617	0.814393	1.1001	0.797753	1.22194
1036	Smar_temp_003991:	6146	0	1101	2017	1203	1825	253	202	0	0	695	277	365	423	0	205	0	558	383	424	232	0	752	417	341	323	0	0	295	0	0	0.937327	1.13605	0.924515	0.943743	0.931661	1.07142	1.07444	1.07653	0.825821	1.15408	1.03937	0.847271	0.707929	1.07217	0.987973	1.28248
1037	Smar_temp_002637:	13063	741	1909	4400	2170	3843	434	511	0	0	1603	374	491	824	740	372	1	1304	734	867	351	1	2058	651	547	638	0	0	561	0	0	1.61138	1.38862	0.671757	0.850691	1.00739	1.12735	1.20396	1.10684	0.878771	1.01243	1.33344	0.665945	0.66979	1.14976	1.13602	1.41787
1038	Smar_temp_006006:	52454	40	8323	16850	9463	17778	1862	1495	0	0	7663	2355	2584	2951	38	1284	1	4909	3521	3924	1799	0	6784	3189	2571	2669	0	0	2851	2	1	0.99566	1.25333	0.850046	0.961614	0.859585	0.970776	1.09069	1.19812	0.888923	1.19276	0.972263	0.834847	0.687108	1.09782	0.94616	1.27178
1039	Smar_temp_010659:	1075	0	186	345	215	329	55	52	0	0	116	38	46	63	0	33	0	114	62	92	36	0	126	63	58	59	0	0	61	0	0	1.39785	1.138	0.666667	0.971638	1.07969	0.913043	1.27907	0.967742	0.927052	1.0554	1.02541	0.667549	0.871327	0.942249	1.03646	1.15206
1040	Smar_temp_002025:	1981	0	400	566	404	611	83	83	0	0	208	110	110	124	0	87	0	180	128	154	83	0	167	120	109	121	0	0	113	0	0	1.01747	1.03269	0.95297	0.95375	1.0311	1.07426	1.0074	1.01747	0.90686	1.05	1.07717	0.891612	0.88216	1.02724	0.980773	1.10374
1041	Smar_temp_000538:	917	0	148	324	168	277	30	22	0	0	91	36	66	69	0	33	0	99	50	87	18	0	110	57	48	49	0	0	51	0	0	0.811374	0.960886	1.11188	0.917918	1.01153	1.16242	0.974702	0.663851	1.00496	1.09003	1.38153	0.805249	0.888922	0.985259	1.09603	1.08755
1042	Smar_temp_007864:	13996	40	2333	4561	2443	4619	459	417	1	0	1943	569	681	739	38	401	0	1355	883	1137	493	0	1740	945	783	656	2	0	752	0	1	1.024	1.17067	0.855397	1.02989	0.900192	0.92825	1.07639	1.21063	0.932718	1.24297	1.03114	0.739015	0.755364	1.0952	0.852011	1.27462
1043	Smar_temp_003154:	1024	0	176	370	187	291	45	45	0	0	112	42	52	66	0	25	0	97	45	81	35	0	158	64	63	53	0	0	40	0	0	1.4001	1.18183	0.769591	0.990663	0.922523	0.976789	1.31774	1.08896	0.752706	1.00639	0.826446	0.839738	0.770354	0.846794	1.05967	1.35435
1044	Smar_temp_009675:	1580	0	235	445	315	585	60	41	0	0	245	76	77	86	0	29	0	157	137	115	62	0	154	89	56	88	0	0	107	0	0	0.87511	1.22873	0.867915	0.846091	0.952886	0.96936	0.955404	1.32334	0.917433	1.34468	0.829697	0.873468	0.697974	1.17466	1.01138	1.13113
1045	Smar_temp_003405:	1824	0	294	604	326	600	70	70	0	0	238	46	75	105	0	56	0	222	111	144	57	0	232	122	74	107	0	0	94	0	0	1.33216	1.15995	0.694755	0.760103	1.11735	0.972657	1.2014	1.08476	0.876564	1.25314	1.18173	0.475646	0.724768	1.03509	1.10639	1.20587
1046	Smar_temp_007204:	3146	0	448	1050	522	1126	97	72	0	0	519	143	153	168	0	60	0	312	200	271	105	0	438	173	147	135	0	0	152	0	0	0.968596	1.24984	0.878194	0.983125	0.830206	0.964291	1.11993	1.41254	0.813567	1.15701	0.940489	0.891822	0.721108	1.07048	0.84193	1.2878
1047	Smar_temp_004636:	4200	338	633	1286	592	1351	87	152	0	0	604	151	153	193	337	114	0	411	199	329	127	0	547	216	174	218	0	0	185	1	1	1.7036	1.38917	0.844069	0.897747	0.993562	1.06474	1.04262	1.4234	0.971503	1.11444	1.19494	0.741596	0.795333	1.04502	1.07065	1.38987
1048	Smar_temp_010862:	2606	0	537	767	622	680	134	176	0	0	246	116	153	216	0	105	0	187	159	123	141	0	287	140	139	152	0	0	131	0	0	1.37316	1.27135	0.835757	0.879467	0.934355	1.17989	0.902606	1.10009	0.807135	0.885794	0.948888	0.827845	0.614576	0.979653	1.08476	1.38641
1049	Smar_temp_005571:	253	0	48	84	40	81	5	9	0	0	28	16	8	16	0	6	0	29	18	20	11	0	30	17	16	15	0	0	8	0	0	1.18594	1.07568	0.602381	1.00397	1.07834	1.20476	0.790625	1.44948	0.624691	1.06672	0.658854	1.04115	0.74368	1.40556	0.97608	1.07971
1050	Smar_temp_004072:	24151	80	3927	8023	4116	8005	795	599	0	1	3236	1082	1114	1259	76	671	2	2358	1608	1883	735	0	3303	1575	1246	1275	0	0	1327	3	2	0.895005	1.23928	0.81472	0.955115	0.886708	0.920765	1.13332	1.09821	0.972679	1.20731	1.05084	0.831266	0.708088	1.17865	0.979542	1.21961
1051	Smar_temp_007107:	648	0	92	209	154	193	33	23	0	0	74	20	48	55	0	19	0	50	50	44	17	0	79	30	31	25	0	0	49	0	0	1.05195	1.17195	0.966383	1.04473	0.803233	1.10731	0.90167	0.777527	1.0683	1.01103	1.45463	0.729894	0.706845	1.0901	0.912368	1.28734
1052	Smar_temp_007897:	3583	0	555	1254	632	1142	109	98	0	0	482	141	202	235	0	68	0	338	223	276	107	0	495	248	218	161	0	0	181	0	0	1.00107	1.12786	0.913237	1.12231	0.845668	1.06243	0.977775	1.093	0.89855	1.27676	0.790988	0.797089	0.690545	1.10705	0.910151	1.32422
1053	Smar_temp_012230:	16658	173	2696	5416	2811	5562	503	386	0	0	2299	780	807	893	172	456	1	1636	1115	1320	567	0	2127	1074	846	827	0	0	847	1	0	0.848456	1.20791	0.882992	0.96515	0.904683	0.977091	1.0604	1.24631	0.902432	1.22526	1.04508	0.866496	0.72994	1.18797	0.918708	1.23794
1054	Smar_temp_008334:	580	0	94	208	124	154	35	31	0	0	55	16	30	48	0	18	0	59	28	45	17	0	85	29	33	26	0	0	24	0	0	1.54255	1.13952	0.674628	0.978928	1.06831	1.0794	1.32024	0.845916	0.728948	0.86027	1.18153	0.641061	0.81481	0.85044	1.04172	1.34508
1055	Smar_temp_004077:	7811	0	1241	2489	1513	2568	348	284	0	0	1054	297	312	459	0	233	0	797	569	569	287	0	1034	427	345	376	0	0	419	0	0	1.18145	1.3037	0.647139	0.872427	0.973969	0.952041	1.18743	1.19393	0.842339	1.07979	1.18173	0.727941	0.695343	1.14389	0.921569	1.24841
1056	Smar_temp_009341:	1180	0	194	418	195	373	28	18	0	0	120	64	73	69	0	35	0	125	76	119	34	0	152	77	67	58	0	0	64	0	0	0.561459	1.02653	1.0568	0.974942	0.946034	0.998896	0.868902	1.06053	1.03829	1.12046	1.09735	1.04364	0.900625	1.23297	0.9458	1.01776
1057	Smar_temp_003649:	623	0	128	187	124	184	25	10	0	0	56	21	38	44	0	33	0	71	51	30	19	0	48	64	29	47	0	0	36	0	0	0.392515	0.855157	1.02096	0.754804	1.28554	1.18216	1.01294	0.745779	0.982994	1.66578	1.25482	0.555494	0.543188	1.39258	1.24325	1.03048
1058	Smar_temp_007861:	535	0	94	168	112	161	23	22	0	0	51	25	26	39	0	20	0	52	41	45	17	0	56	27	33	24	0	0	33	0	0	1.11797	1.06151	0.739264	1.11797	1.02854	1.1089	0.980947	0.863887	0.979093	0.914704	1.21096	0.883772	0.890084	1.21645	0.848421	1.05262
1059	Smar_temp_007032:	413	0	51	153	82	127	10	9	0	0	39	18	30	36	0	6	0	47	33	39	13	0	59	18	16	16	0	0	23	0	0	0.888809	1.04092	0.987566	0.846854	0.998971	1.18508	0.614218	1.28384	0.912138	0.95271	0.95271	1.14775	0.828933	1.30872	1.02023	0.998636
1060	Smar_temp_008299:	2229	0	348	754	411	716	81	79	0	0	293	84	112	138	0	57	0	213	139	184	66	0	303	128	125	100	0	0	126	0	0	1.23116	1.18798	0.805592	1.06187	0.879438	0.992604	1.06884	1.02857	0.95439	1.08735	1.04912	0.751445	0.759702	1.05286	0.894577	1.27395
1061	Smar_temp_012412:	1380	240	228	270	250	392	52	77	0	1	164	48	41	57	239	36	1	99	80	70	62	0	76	67	53	77	0	0	79	0	0	1.86421	1.43868	0.838222	1.18811	1.29082	1.16533	1.14816	1.50105	1.11245	1.50195	0.955679	0.741139	0.912698	1.12653	1.18891	1.47282
1062	Smar_temp_006517:	1697	0	210	656	295	536	40	40	0	0	207	61	104	141	0	21	0	190	111	149	36	0	277	88	85	68	0	0	78	0	0	1.09572	1.09233	0.911988	1.04707	0.916995	1.23645	0.780006	0.98615	0.837124	1.08403	0.808095	0.919661	0.719117	1.19129	1.0252	1.22271
1063	Smar_temp_003168:	648	0	94	208	130	216	24	16	0	0	78	23	42	35	0	12	0	66	48	59	22	0	70	43	29	31	0	0	49	0	0	0.848445	1.04845	1.00651	0.961129	0.951923	0.838757	0.920237	1.16661	1.13077	1.42512	0.880036	0.734043	0.850962	1.10769	0.989362	1.08333
1064	Smar_temp_001027:	2169	0	372	734	379	684	82	56	0	0	242	100	124	148	0	94	0	253	117	209	60	0	254	122	102	116	0	0	89	0	0	0.86152	1.02259	0.966821	0.810253	1.09302	1.15395	1.23821	0.923057	0.744654	0.969126	1.47334	0.852434	0.902929	0.978927	0.988823	1.12192
1065	Smar_temp_000205:	5271	0	1060	1772	1041	1398	230	145	0	0	486	283	317	370	0	221	0	420	349	293	231	0	697	411	338	270	0	0	209	0	0	0.692635	1.17003	0.905812	0.948506	0.893658	1.05726	1.11871	1.10344	0.756975	1.15336	1.03675	1.00662	0.623433	1.26404	0.960381	1.31074
1066	Smar_temp_010367:	2461	0	409	800	422	830	84	57	0	0	387	94	118	139	0	102	0	238	163	173	89	0	332	156	111	107	0	0	110	0	0	0.812738	1.27664	0.860184	0.834875	0.882105	1.01327	1.16082	1.26901	0.772883	1.17334	1.5006	0.681456	0.641194	1.14527	0.7757	1.3825
1067	Smar_temp_002767:	3831	0	722	1287	601	1221	119	95	0	0	471	195	160	178	0	149	0	373	227	292	122	0	533	283	220	231	0	0	182	0	0	0.838734	1.23277	0.792463	0.907025	0.909341	0.881615	1.26215	1.07711	0.950153	1.16676	1.09502	0.847411	0.71187	1.18508	1.00386	1.21032
1068	Smar_temp_004093:	4324	193	760	1165	1007	1199	220	169	0	1	408	163	270	324	192	166	1	352	348	243	188	0	335	262	207	199	0	0	275	0	0	0.954837	1.06728	0.995163	1.01092	1.08964	1.1942	0.938101	1.06219	0.984849	1.27952	1.2427	0.773465	0.752223	1.24628	0.944291	1.22718
1069	Smar_temp_006800:	2884	0	466	944	585	889	118	129	0	0	371	78	149	209	0	86	0	286	188	201	104	0	361	173	147	129	0	0	154	0	0	1.36472	1.16831	0.778133	0.963728	0.982851	1.09147	0.99441	1.10024	0.854001	1.13418	1.14215	0.543003	0.690745	1.04255	0.898043	1.35383
1070	Smar_temp_003562:	16528	0	2238	5442	2882	5966	558	229	0	0	2641	687	822	943	0	380	0	1737	1273	1370	480	0	2187	942	695	682	0	0	901	0	0	0.586816	1.22054	0.866243	0.943162	0.884257	0.993755	1.11037	1.23001	0.8661	1.27836	1.25396	0.85042	0.697428	1.22369	0.844231	1.22637
1071	Smar_temp_010403:	2064	0	349	637	375	703	82	97	0	0	314	69	68	128	0	76	0	221	128	155	66	0	247	106	101	106	0	0	99	0	0	1.52977	1.2564	0.587554	0.937705	1.01861	1.10598	1.20354	1.04087	0.775101	0.984126	1.28787	0.580468	0.714409	1.00215	0.891733	1.31138
1072	Smar_temp_004993:	9824	0	1583	3578	1667	2996	244	169	0	0	1092	474	644	670	0	253	0	961	610	766	284	0	1454	687	519	527	0	0	469	0	0	0.629156	1.11576	1.06071	0.900191	0.880703	1.10354	0.862595	1.05728	0.922537	1.19158	0.991852	0.981847	0.701997	1.19989	1.09163	1.19516
1073	Smar_temp_003668:	19103	21	3427	6212	3553	5890	695	713	0	2	2385	850	1003	1209	19	690	2	1711	1141	1366	706	0	2463	1174	1035	996	0	0	942	0	0	1.11862	1.21928	0.868112	0.928745	0.893315	1.04641	1.05171	1.10764	0.859888	1.05347	1.12233	0.804435	0.71319	1.04154	0.942609	1.31329
1074	Smar_temp_008900:	642	0	91	267	97	187	16	8	0	0	72	23	34	35	0	14	0	66	39	56	20	0	129	46	37	20	0	0	26	0	0	0.581851	1.16172	0.842812	0.977652	0.848645	0.867601	1.09172	1.45463	0.920227	1.21546	1.08538	0.867721	0.720062	1.38034	0.75454	1.32186
1075	Smar_temp_010075:	8878	0	1526	2896	1569	2887	294	238	0	0	1156	396	452	478	0	284	0	856	585	664	317	0	1145	608	443	482	0	0	479	0	0	0.8825	1.21206	0.883145	0.88995	0.908957	0.933946	1.06027	1.17543	0.938817	1.22142	1.08274	0.798011	0.705079	1.14657	0.971317	1.23134
1076	Smar_temp_006316:	5651	40	1074	1729	1251	1557	280	220	0	1	513	258	373	437	38	196	0	510	378	361	258	1	531	400	314	305	0	1	274	0	1	0.925308	1.00376	0.9745	0.955555	1.07056	1.14171	1.01104	1.08513	0.794932	1.21727	0.960225	0.871871	0.75779	1.09666	1.0307	1.19582
1077	Smar_temp_004440:	1545	0	250	518	288	489	53	52	0	0	207	55	87	97	0	48	0	149	96	122	60	0	203	95	78	64	0	0	78	0	0	1.11583	1.16887	0.901001	0.930579	0.908816	1.00456	0.987232	1.2875	0.8557	1.1334	1.18656	0.695092	0.744132	1.05317	0.808834	1.33746
1078	Smar_temp_002093:	5785	0	989	1870	1198	1728	231	275	0	0	699	230	318	435	0	148	0	503	374	370	237	0	729	336	319	285	0	0	295	0	0	1.34271	1.206	0.821168	0.997829	0.900505	1.1233	0.931112	1.15717	0.824375	1.051	0.875331	0.778558	0.662399	1.04514	0.964735	1.35423
1079	Smar_temp_005638:	1537	0	259	470	300	508	64	72	0	0	223	65	69	109	0	47	0	149	95	110	56	0	175	75	76	80	0	0	71	0	0	1.42425	1.21763	0.752149	0.959599	0.959177	1.18818	1.09298	1.10775	0.716056	0.946973	1.07689	0.759318	0.708117	0.958104	0.934545	1.32816
1080	Smar_temp_010807:	19356	60	2758	6817	3219	6502	676	569	2	0	2888	647	818	1109	57	489	0	2010	1154	1517	476	0	3139	1050	850	943	2	1	957	1	0	1.24055	1.30744	0.72153	0.875078	0.877751	0.978212	1.26276	1.03778	0.885033	1.08098	1.24433	0.698359	0.662462	1.06722	1.01786	1.32227
1081	Smar_temp_007756:	1541	0	245	538	325	433	78	66	0	0	138	55	72	120	0	36	0	157	109	122	44	0	207	88	101	64	0	0	83	0	0	1.27731	1.10207	0.634555	1.1808	1.03856	1.05759	1.13797	0.851542	0.908886	1.02881	0.924215	0.798935	0.807035	1.1936	0.92967	1.13424
1082	Smar_temp_005798:	446	0	78	131	86	151	12	29	0	0	71	15	17	39	0	17	0	48	27	34	18	0	41	17	24	19	0	0	17	0	0	1.92815	1.06556	0.672998	1.04756	1.08225	1.54394	0.723634	1.19678	0.58386	0.742024	1.24622	0.568008	0.766594	0.927306	0.719477	1.3888
1083	Smar_temp_001309:	768	0	152	224	191	201	45	17	0	0	58	49	63	64	0	35	0	42	66	39	30	0	69	51	49	38	0	0	52	0	0	0.449711	1.05612	1.13089	1.10526	0.716418	1.14884	0.947342	0.793607	1.04024	1.15038	1.16343	1.23174	0.665245	1.32031	0.955224	1.10255
1084	Smar_temp_007936:	243	0	44	82	51	66	9	8	0	0	7	17	1	25	0	7	0	27	33	8	2	0	36	12	17	18	0	0	15	0	0	0.86631	1.30101	0.0581062	1.14496	1.21231	1.45265	0.84083	0.216578	1.08289	0.808204	0.878616	1.42252	0.359202	2.38235	1.5062	0.390496
1085	Smar_temp_005733:	5650	0	978	1887	950	1835	210	188	0	0	834	183	209	294	0	217	0	547	343	359	175	0	844	390	286	299	0	0	271	0	0	1.14326	1.33921	0.658718	0.875596	0.89254	0.926617	1.31468	1.0642	0.878331	1.19399	1.28183	0.576135	0.585781	1.11169	0.941336	1.3994
1086	Smar_temp_004248:	10008	0	1713	3159	2241	2895	485	403	0	0	1072	407	628	818	0	306	0	885	725	606	407	0	1138	597	508	491	0	0	531	0	0	1.05064	1.14128	0.887801	0.939516	0.968484	1.1564	0.966508	1.06107	0.819127	1.10412	1.04365	0.821364	0.663165	1.11839	0.990884	1.2801
1087	Smar_temp_002332:	2690	0	471	763	462	994	65	79	0	0	442	149	112	114	0	91	0	245	206	200	124	0	297	152	109	146	0	0	158	0	0	0.976599	1.37233	0.85468	0.815893	0.868975	0.869943	0.819184	1.53289	0.92551	1.13776	1.10345	0.856113	0.709368	1.20668	0.838876	1.20338
1088	Smar_temp_002364:	5484	0	805	1822	1186	1671	267	142	0	0	592	199	368	409	0	136	0	547	409	433	177	0	651	328	255	237	0	0	333	0	0	0.815653	1.07543	0.933925	0.95344	0.985281	1.03798	1.04097	1.01669	0.921469	1.22639	1.15092	0.811294	0.779939	1.13177	0.966214	1.1627
1089	Smar_temp_008638:	13649	0	2272	4539	2634	4204	572	371	0	0	1573	545	773	835	0	420	0	1293	918	1038	433	0	1730	936	743	675	0	0	793	0	0	0.846156	1.14611	0.882479	0.983379	0.924861	0.95326	1.12529	0.987563	0.977452	1.23882	1.11054	0.778801	0.742464	1.13153	0.96457	1.2148
1090	Smar_temp_006489:	5830	0	917	1904	1012	1997	190	212	0	0	857	232	279	362	0	174	0	612	330	497	164	0	746	299	266	313	0	0	296	0	0	1.33185	1.1997	0.844161	0.888206	0.938372	1.09529	1.08159	1.0303	0.85389	0.998397	1.20637	0.7386	0.762044	0.951971	0.996473	1.25283
1091	Smar_temp_005401:	9032	0	1564	3014	1548	2906	248	305	0	0	1140	398	399	493	0	279	0	930	596	728	369	0	1210	582	475	441	0	0	438	0	0	1.13783	1.20305	0.772401	0.910118	0.959021	0.95437	0.934746	1.37658	0.87941	1.11513	1.03018	0.790924	0.750717	1.19664	0.876375	1.21926
1092	Smar_temp_006814:	2894	20	469	948	452	1005	76	78	1	0	400	139	118	139	19	78	0	319	179	273	89	0	362	173	149	153	1	0	147	0	0	1.06483	1.16571	0.796955	0.969848	0.96898	0.938786	1.07655	1.215	0.936508	1.12606	1.02624	0.853443	0.829252	1.14037	0.939401	1.14611
1093	Smar_temp_002393:	2971	0	530	1081	490	870	66	90	0	0	284	123	162	165	0	109	0	317	172	291	112	0	417	208	185	123	0	0	146	0	0	1.02961	1.0602	0.908648	0.959341	1.00142	0.925475	0.816685	1.28129	1.01751	1.07861	1.15286	0.792524	0.919286	1.19871	0.792524	1.11476
1094	Smar_temp_004374:	1194	0	207	344	360	283	120	69	0	0	87	35	78	107	0	48	0	72	93	47	44	0	134	55	59	56	0	0	89	0	0	1.10556	1.35205	0.752035	0.989299	0.883064	1.03164	1.10556	0.704992	1.04305	0.922228	1.33753	0.713371	0.576444	1.08993	1.14139	1.29703
1095	Smar_temp_010990:	25000	0	3649	8307	4507	8537	807	588	0	0	3627	1066	1372	1558	0	549	0	2459	1740	2030	757	0	3273	1446	1202	1140	0	0	1385	0	0	0.893832	1.18576	0.916141	0.991349	0.86686	1.04034	0.993204	1.15073	0.899906	1.19259	1.03078	0.855496	0.715627	1.13057	0.914883	1.24416
1096	Smar_temp_010599:	682	0	109	216	148	209	26	33	0	0	74	23	42	46	0	17	0	64	47	57	27	0	76	36	34	31	0	0	48	0	0	1.39512	1.11094	0.896021	0.984879	0.966862	0.981356	0.809533	1.14146	1.05832	1.04281	0.975844	0.688556	0.861111	1.03627	0.928054	1.15538
1097	Smar_temp_003001:	991	0	139	330	129	393	24	15	0	0	173	51	37	37	0	21	0	125	53	113	24	0	127	52	40	54	0	0	44	0	0	0.829011	1.15571	0.861334	0.864181	0.955162	0.861334	1.42924	1.32642	0.86009	1.12344	1.07712	0.925202	0.863467	1.03602	0.979625	1.11003
1098	Smar_temp_009083:	7761	0	1391	2402	1655	2313	324	450	0	0	928	298	451	602	0	231	0	685	430	512	326	0	875	412	391	443	0	0	402	0	0	1.51707	1.17701	0.880488	0.908227	0.956885	1.17528	0.918051	1.09903	0.815023	0.957006	0.926564	0.718838	0.715219	0.871791	1.06861	1.34621
1099	Smar_temp_000357:	4431	0	777	1384	766	1504	162	142	0	0	677	187	214	248	0	155	0	438	248	328	154	0	515	293	216	251	0	0	202	0	0	1.05716	1.19134	0.894439	0.890017	0.932378	1.03655	1.22337	1.1465	0.77692	1.20729	1.1376	0.709046	0.698219	0.953843	0.951714	1.32616
1100	Smar_temp_005476:	16087	0	2610	5860	2652	4965	418	484	0	0	2043	689	843	959	0	448	0	1509	907	1312	550	0	2600	989	908	703	0	0	724	0	0	1.12488	1.21802	0.872633	0.955043	0.834348	0.99271	0.956102	1.27827	0.884547	1.04024	1.05797	0.855332	0.725424	1.10813	0.872711	1.33323
1101	Smar_temp_012787:	8990	0	1337	2676	1754	3223	355	253	0	0	1460	389	462	555	0	243	0	832	684	666	303	0	1003	452	379	412	0	0	541	0	0	0.969883	1.25918	0.884883	0.952317	0.867235	1.06301	1.03736	1.16156	0.860334	1.13574	1.22209	0.811554	0.694205	1.08774	0.859538	1.26355
1102	Smar_temp_002725:	2507	0	400	919	419	769	58	64	0	0	322	80	142	191	0	84	0	264	155	172	67	0	384	171	129	120	0	0	103	0	0	0.957327	1.13987	0.924513	0.879769	0.936519	1.24354	0.828236	1.0022	0.801403	1.16621	1.31618	0.652016	0.610156	1.206	0.978023	1.36508
1103	Smar_temp_008427:	10166	0	1879	2969	1986	3332	403	373	0	0	1343	522	494	565	0	385	0	851	716	660	402	0	1145	598	479	613	0	0	616	0	0	1.01614	1.32049	0.851702	0.872868	0.874509	0.974112	1.03872	1.09514	0.946339	1.08972	1.10856	0.847596	0.678233	1.09997	0.995357	1.22975
1104	Smar_temp_009763:	7418	0	1129	2411	1248	2630	232	188	0	0	1131	321	340	393	0	196	0	775	488	667	219	0	926	424	370	344	0	0	403	0	0	0.989774	1.18169	0.838212	1.00832	0.906641	0.968875	1.10496	1.15298	0.910797	1.15548	1.14066	0.801941	0.780297	1.1029	0.8594	1.21294
1105	Smar_temp_011948:	867	0	170	313	170	214	27	28	0	0	71	38	64	75	0	31	0	73	51	41	36	0	123	73	52	51	0	0	32	0	0	0.84	1.08852	1.04281	0.847284	0.944896	1.22204	0.81	1.08	0.762617	1.18946	0.93	0.905607	0.530695	1.21542	1.21542	1.34416
1106	Smar_temp_003625:	871	0	170	321	149	231	27	57	0	0	95	29	40	64	0	26	0	80	25	60	32	0	139	58	61	51	0	0	26	0	0	1.96001	1.17496	0.728428	0.97363	0.939704	1.16549	1.05928	1.10036	0.657951	0.925747	0.783599	0.643214	0.704778	0.632645	1.13117	1.55066
1107	Smar_temp_004939:	3425	0	650	1132	670	973	117	105	0	0	341	136	212	227	0	119	0	314	236	236	143	0	378	290	228	160	0	0	182	0	0	0.825775	1.01032	0.95736	1.06129	0.976407	1.0251	0.892682	1.12463	0.95619	1.34989	0.964675	0.736501	0.73386	1.2399	0.866472	1.23364
1108	Smar_temp_005501:	2517	0	585	795	435	702	72	79	0	0	226	170	119	142	0	107	0	186	165	158	100	0	265	229	225	153	0	0	120	0	0	0.781385	1.05535	0.866111	1.21771	0.838865	1.03351	0.957717	0.989095	0.989095	1.23935	0.786965	1.04193	0.712584	1.36001	0.937738	1.1543
1109	Smar_temp_006622:	2569	0	471	824	446	828	80	74	0	0	309	141	136	136	0	71	0	244	156	193	96	0	309	185	134	170	0	0	134	0	0	0.904982	1.16914	0.950694	0.886994	0.918748	0.950694	1.0332	1.17403	0.932188	1.22458	0.822206	0.928821	0.726715	1.08523	1.11985	1.15788
1110	Smar_temp_001474:	6036	0	864	2050	1014	2108	166	178	0	0	1038	180	267	338	0	152	0	610	403	440	230	0	917	354	255	227	0	0	280	0	0	1.22636	1.31708	0.775298	0.869004	0.852029	0.981463	0.974499	1.58462	0.790676	1.20638	1.22904	0.596537	0.614579	1.13801	0.752299	1.40996
1111	Smar_temp_011322:	353	0	67	109	74	103	19	10	0	0	41	17	24	18	0	21	0	26	21	27	18	0	44	19	14	14	0	0	19	0	0	0.711981	1.3073	1.05033	0.676708	0.817494	0.787751	1.2248	1.28157	0.879953	0.91839	1.65137	0.869584	0.848936	0.972579	0.716128	1.36422
1112	Smar_temp_006104:	1333	0	193	443	289	408	58	53	0	0	172	51	93	113	0	31	0	112	85	101	45	0	170	58	67	50	0	0	73	0	0	1.26663	1.15471	0.968304	1.04459	0.826008	1.17654	0.925683	1.07544	0.825268	0.904268	1.10937	0.863342	0.744882	0.960928	0.846414	1.37733
1113	Smar_temp_006728:	3570	0	525	1209	581	1255	102	124	0	0	575	120	153	221	0	83	0	382	201	294	79	0	496	198	178	185	0	0	178	0	0	1.45129	1.21143	0.777602	1.00116	0.898797	1.1232	1.07874	0.924613	0.871502	1.11365	1.07505	0.650199	0.691744	0.984112	1.00239	1.30331
1114	Smar_temp_010327:	1782	0	323	518	332	609	75	77	0	0	267	81	56	94	0	73	0	170	124	113	72	0	218	92	73	105	0	0	91	0	0	1.27955	1.44779	0.580267	0.777496	0.960306	0.97402	1.21253	1.19646	0.802036	0.979858	1.24688	0.733792	0.638321	1.09288	0.951212	1.28288
1115	Smar_temp_003150:	11032	635	1734	3428	1822	3413	330	367	0	5	1435	415	495	578	629	294	5	992	630	821	347	0	1370	658	571	522	0	1	565	1	0	1.28151	1.28615	0.87432	1.05974	0.935382	1.02092	1.09666	1.21168	1.00235	1.22121	1.07871	0.773601	0.774141	1.11766	0.973059	1.35904
1116	Smar_temp_005868:	3701	0	520	1276	636	1269	88	130	0	0	566	119	184	250	0	85	0	393	233	309	107	0	531	186	167	161	0	0	191	0	0	1.4548	1.20701	0.83913	0.931497	0.898254	1.14012	0.80517	1.19741	0.875858	1.03748	1.16341	0.667423	0.706261	1.06846	0.902984	1.30081
1117	Smar_temp_002272:	26045	726	4390	8877	4515	7537	896	812	0	0	2895	987	1363	1583	724	871	0	2419	1443	1936	798	1	3637	1720	1457	1263	0	2	1236	1	0	1.06698	1.20209	0.88572	0.973763	0.941663	1.02868	1.14477	1.04859	0.94599	1.14953	1.1771	0.776924	0.753642	1.10442	0.994179	1.32732
1118	Smar_temp_012028:	9740	0	1588	3275	1667	3210	298	394	0	0	1362	369	445	595	0	257	0	1004	530	802	298	0	1310	568	516	516	0	0	475	0	0	1.44967	1.18962	0.793911	0.966378	0.9302	1.06152	1.04449	1.09645	0.864593	1.06376	0.992638	0.705066	0.743048	0.964704	0.985946	1.28744
1119	Smar_temp_006711:	1524	0	197	546	268	513	48	54	0	0	227	45	71	122	0	27	0	169	95	124	27	0	229	71	76	67	0	0	71	0	0	1.55875	1.17067	0.739462	1.07681	0.919521	1.27062	1.01849	0.779377	0.78703	1.00597	1.06027	0.6786	0.674678	1.05307	1.01036	1.31455
1120	Smar_temp_007180:	519	0	62	181	121	155	24	18	0	0	49	20	39	46	0	6	0	52	40	53	17	0	63	18	26	13	0	0	34	0	0	1.24527	0.998046	0.924204	1.20246	0.961968	1.09009	0.850762	1.17609	0.940869	0.832472	0.810094	1.08012	0.980467	1.1069	0.702081	1.05852
1121	Smar_temp_008610:	495	0	86	183	106	120	13	29	0	0	43	11	33	53	0	12	0	45	31	21	19	0	74	34	30	25	0	0	21	0	0	1.5747	1.09379	0.842097	0.943576	1.01434	1.35246	0.572713	1.0317	0.817217	1.06939	0.803137	0.527616	0.473361	1.20637	1.19913	1.47812
1122	Smar_temp_010772:	1298	0	177	470	224	427	44	35	0	0	188	43	73	83	0	28	0	132	72	114	33	0	201	71	63	53	0	0	64	0	0	1.14583	1.18107	0.900019	0.982979	0.853735	1.02331	1.13823	1.08036	0.868518	1.1078	1.16008	0.738486	0.737316	0.977083	0.910226	1.33837
1123	Smar_temp_001773:	1095	0	256	314	245	280	44	52	0	0	89	70	74	91	0	52	0	72	75	42	61	0	98	82	69	74	0	0	49	0	0	0.907844	1.08838	1.0533	0.939926	0.896724	1.29527	0.802666	1.06497	0.782143	1.11701	0.868835	1.06934	0.523089	1.19716	1.13044	1.24305
1124	Smar_temp_001897:	1200	0	209	335	250	406	47	47	0	0	164	55	57	71	0	30	0	117	99	85	62	0	101	77	59	58	0	0	70	0	0	1.07943	1.07997	0.816716	1.01121	1.03228	1.01731	0.9024	1.42392	0.827586	1.31972	0.824157	0.777807	0.749945	1.17044	0.820232	1.19391
1125	Smar_temp_002002:	7865	0	1317	2340	1481	2727	332	160	0	0	1078	439	387	420	0	232	0	736	601	604	255	0	830	486	386	444	0	0	474	0	0	0.645176	1.19219	0.878292	0.985109	0.907143	0.953185	1.19049	1.02825	0.923075	1.24032	1.052	0.961374	0.744449	1.1704	0.972324	1.14011
1126	Smar_temp_011596:	21691	0	3099	7021	3868	7703	748	496	0	0	3193	1011	1086	1174	0	427	0	2261	1538	1926	709	0	2756	1165	917	1046	0	0	1237	0	0	0.897539	1.21272	0.867409	0.914173	0.90682	0.937696	1.08445	1.28297	0.90054	1.16141	0.964416	0.918648	0.772462	1.11967	0.950451	1.16724
1127	Smar_temp_002186:	3535	0	556	1070	767	1142	144	101	0	0	415	143	239	241	0	98	0	342	283	287	140	0	327	214	162	156	0	0	242	0	0	0.837222	1.00965	1.02946	0.9626	0.989386	1.03807	0.865289	1.16051	0.97666	1.27158	1.12064	0.796131	0.830274	1.14213	0.868507	1.12488
1128	Smar_temp_006787:	4068	0	642	1310	809	1307	156	173	0	0	529	148	211	255	0	112	0	399	269	338	168	0	508	209	191	171	0	0	230	0	0	1.35501	1.20421	0.809923	0.923864	0.947997	0.978817	0.969635	1.31585	0.884881	1.01093	1.10542	0.717517	0.803065	1.03493	0.829023	1.25975
1129	Smar_temp_001554:	673	0	106	252	157	158	45	14	0	0	44	27	42	48	0	26	0	56	56	42	32	0	122	39	32	16	0	0	31	0	0	0.566158	1.29293	0.714437	0.806229	0.946554	0.8165	1.22865	1.29408	0.841047	0.982592	1.55732	1.08497	0.709916	1.51931	0.642942	1.18619
1130	Smar_temp_008582:	25269	0	4154	7905	4610	8600	966	824	0	0	3770	1116	1039	1539	0	778	0	2468	1781	1725	859	0	3204	1436	1194	1323	0	0	1246	0	0	1.0873	1.29562	0.720445	0.918806	0.917345	1.06715	1.14859	1.13348	0.794158	1.10503	1.13929	0.789382	0.641175	1.13515	0.9358	1.28805
1131	Smar_temp_012488:	1256	0	185	380	231	460	43	53	0	0	205	51	49	71	0	22	0	127	86	91	40	0	158	59	45	78	0	0	77	0	0	1.55769	1.37429	0.701116	0.803983	0.91254	1.0159	1.01212	1.17562	0.910145	1.05411	0.807363	0.752714	0.653867	1.01653	1.15121	1.21682
1132	Smar_temp_005783:	9679	0	1432	3522	1619	3106	276	216	0	0	1215	419	530	577	0	237	0	1009	597	891	303	0	1494	559	489	403	0	0	463	0	0	0.901767	1.16574	0.899643	0.938441	0.892752	0.979423	1.01917	1.26498	0.891175	1.07278	1.11865	0.911801	0.788347	1.1491	0.876983	1.219
1133	Smar_temp_001785:	5473	0	993	1757	915	1808	154	151	0	0	714	292	241	264	0	184	0	513	368	424	207	0	703	366	300	302	0	0	289	0	0	0.909561	1.24634	0.820445	0.941078	0.883838	0.898745	1.00671	1.24688	0.956101	1.14812	1.02128	0.890145	0.730502	1.21746	0.920629	1.19544
1134	Smar_temp_008326:	7078	0	1286	2255	1141	2396	210	268	0	0	989	374	274	312	0	231	0	661	388	567	247	0	963	413	356	452	0	0	372	0	0	1.29276	1.34043	0.753753	0.868906	0.865922	0.858288	1.14172	1.19146	0.963121	1.00803	0.988646	0.859121	0.74278	1.00455	1.0383	1.21936
1135	Smar_temp_012279:	2346	0	402	798	371	775	43	80	0	0	292	107	100	161	0	67	0	267	148	184	58	0	304	148	126	151	0	0	109	0	0	1.2584	1.11994	0.792412	0.921445	1.01283	1.27578	0.732907	0.912339	0.889363	1.08233	0.972637	0.80572	0.697977	1.20757	1.13704	1.14053
1136	Smar_temp_002484:	2630	0	421	926	467	816	93	62	0	0	320	101	159	160	0	86	0	258	153	229	77	0	365	172	143	114	0	0	137	0	0	0.82937	1.11951	0.966997	0.964714	0.897996	0.973078	1.12151	1.03002	0.945517	1.16036	1.27612	0.773223	0.797058	1.05594	0.872747	1.26394
1137	Smar_temp_008991:	678	0	106	253	131	188	23	25	0	0	59	22	43	51	0	17	0	75	40	54	25	0	105	42	29	35	0	0	32	0	0	1.22065	1.11219	0.879643	0.733164	1.06909	1.0433	0.908688	1.22065	0.880949	1.06182	1.02581	0.748495	0.769742	1.10119	1.19079	1.13179
1138	Smar_temp_002119:	7229	0	1103	2527	1179	2420	197	289	0	0	1077	290	311	384	0	164	0	695	382	584	240	0	1198	360	323	376	0	0	358	0	0	1.60652	1.3562	0.754605	0.837722	0.821566	0.931731	1.02451	1.33414	0.907052	0.933684	0.974476	0.78539	0.690352	0.96786	1.0183	1.32942
1139	Smar_temp_003938:	7796	0	1326	2781	1269	2420	179	250	0	0	957	317	402	458	0	224	0	779	438	619	266	0	1170	534	430	406	0	0	366	0	0	1.15826	1.17939	0.888046	0.909067	0.902387	1.01175	0.866566	1.23239	0.929129	1.12893	0.993191	0.770144	0.717045	1.11191	0.986368	1.27395
1140	Smar_temp_007061:	1361	0	249	420	262	430	53	51	0	0	175	72	70	79	0	42	0	106	88	97	53	0	159	84	84	70	0	0	77	0	0	1.06397	1.22675	0.865776	1.09317	0.798815	0.97709	1.05083	1.10569	0.930206	1.09317	0.921953	0.915214	0.730991	1.06309	0.889792	1.28813
1141	Smar_temp_009843:	578	0	123	207	96	152	20	20	0	0	65	17	26	37	0	33	0	51	30	32	19	0	84	53	46	25	0	0	19	0	0	0.978997	1.1331	0.75624	1.04426	0.93688	1.07619	1.25434	0.930047	0.752604	1.20317	1.26076	0.525567	0.587846	1.18832	0.772893	1.62613
1142	Smar_temp_004131:	5458	0	759	1976	878	1845	173	120	0	0	745	238	255	296	0	119	0	604	330	540	151	0	857	282	259	230	0	0	258	0	0	0.98283	1.19795	0.802218	0.94255	0.904247	0.931202	1.22487	1.23673	0.869285	1.02625	1.12745	0.927625	0.808433	1.11188	0.896444	1.19453
1143	Smar_temp_010783:	3607	0	565	1096	723	1223	147	94	0	0	493	176	211	241	0	92	0	362	271	277	142	0	374	203	149	182	0	0	192	0	0	0.830018	1.12304	0.960461	0.867907	0.974132	1.09702	1.01435	1.25386	0.783218	1.18245	1.03953	0.918722	0.745399	1.10548	0.950042	1.18889
1144	Smar_temp_005999:	3397	0	648	992	754	1003	173	218	0	0	437	96	158	225	0	138	0	268	205	202	153	0	368	196	198	159	0	0	202	0	0	1.51567	1.27034	0.717579	1.04634	0.914993	1.02187	1.03371	1.06375	0.90735	1.03577	1.11641	0.501754	0.689659	0.920825	0.83103	1.47562
1145	Smar_temp_009173:	5936	0	1206	1848	1067	1815	213	314	0	0	754	265	246	350	0	250	0	515	294	383	223	0	738	377	348	384	0	0	281	0	0	1.44848	1.28276	0.740564	0.926881	0.911428	1.05365	1.11057	1.0287	0.861309	1.00412	1.02033	0.718647	0.67782	0.901156	1.04136	1.35866
1146	Smar_temp_002437:	2223	0	364	648	416	795	93	75	0	0	324	103	111	123	0	62	0	235	137	192	67	0	208	124	93	142	0	0	133	0	0	1.10105	1.10117	0.915365	0.876488	1.01406	1.01432	1.19464	0.983602	0.893986	1.16865	1.04023	0.79124	0.828512	0.920873	1.09084	1.13959
1147	Smar_temp_000156:	753	0	131	250	201	171	64	29	0	0	50	17	60	57	0	25	0	60	48	40	36	0	92	60	37	33	0	0	44	0	0	0.829327	1.10842	0.899104	0.850718	1.05684	0.854149	1.19284	1.02951	0.963952	1.37954	1.09696	0.571448	0.704561	1.05158	1.10928	1.28758
1148	Smar_temp_007637:	2754	0	384	911	535	924	130	74	0	0	405	123	136	165	0	66	0	254	195	192	98	0	432	121	88	132	0	0	142	0	0	0.991998	1.43354	0.768477	0.692783	0.831012	0.932343	1.25083	1.31373	0.791091	0.952576	1.23267	0.954698	0.628167	1.08636	1.02455	1.3064
1149	Smar_temp_001768:	1133	0	179	369	270	315	73	29	0	0	102	43	89	89	0	38	0	92	79	92	30	0	118	69	69	42	0	0	78	0	0	0.679847	0.981882	1.01211	1.18359	0.896769	1.01211	1.13455	0.70329	1.03908	1.18359	1.34372	0.864042	0.896769	1.0524	0.843948	1.16469
1150	Smar_temp_006433:	16567	0	2919	5448	2936	5264	541	525	0	0	2181	692	800	959	0	593	0	1520	1070	1157	566	0	2224	1108	904	856	0	0	870	0	0	1.01488	1.24138	0.828592	0.941762	0.878081	0.993275	1.03975	1.09413	0.932591	1.15428	1.153	0.746105	0.668381	1.14698	0.922928	1.30397
1151	Smar_temp_004157:	12329	0	2169	4280	1894	3986	313	335	0	0	1570	605	568	622	0	398	0	1208	678	1014	356	0	1813	831	690	724	0	0	603	0	0	1.00539	1.22022	0.863878	0.916376	0.872999	0.946007	1.07575	1.06841	0.984754	1.10364	1.04302	0.862753	0.732799	1.10724	1.03245	1.2183
1152	Smar_temp_007241:	6787	96	1149	2204	1190	2148	199	333	0	1	940	254	315	422	95	179	0	622	343	481	237	0	917	383	349	384	0	0	331	0	1	1.65293	1.28122	0.815136	0.935345	0.891707	1.09202	0.953755	1.17641	0.87887	1.02647	0.920218	0.698485	0.689568	0.910732	1.05598	1.38273
1153	Smar_temp_006503:	1611	0	274	545	256	536	51	31	0	0	190	84	65	77	0	42	0	184	109	148	50	0	203	116	93	89	0	0	78	0	0	0.711978	1.10103	0.750538	1.0033	1.01473	0.889098	1.25368	1.14835	0.915768	1.25143	0.901247	0.921424	0.816199	1.27973	0.976271	1.06542
1154	Smar_temp_005408:	1097	0	169	382	191	355	33	32	0	0	136	43	62	67	0	30	0	123	64	92	37	0	158	64	39	63	0	0	53	0	0	1.08752	1.18778	0.932184	0.662706	0.994993	1.00736	0.992325	1.25744	0.857474	1.08752	1.15227	0.786249	0.744222	1.03544	1.15195	1.18383
1155	Smar_temp_007511:	1014	44	180	348	180	262	32	58	0	0	94	35	42	64	43	31	0	87	48	62	37	0	164	56	54	58	0	1	46	1	0	1.81519	1.37317	0.679885	0.874138	0.967557	1.03602	1.00148	1.15796	0.989059	0.906513	0.970185	0.752545	0.689524	1.03206	1.24707	1.38856
1156	Smar_temp_001600:	4015	0	650	1257	854	1254	134	204	0	0	472	136	179	370	0	104	0	437	337	246	140	0	434	206	207	199	0	0	209	0	0	1.47552	1.10282	0.669492	1.0172	1.1131	1.38387	0.737691	1.01261	0.783568	1.01229	0.988308	0.669906	0.626596	1.26346	0.980229	1.20513
1157	Smar_temp_004793:	1199	0	268	371	204	356	37	63	0	0	147	56	49	64	0	65	0	101	55	80	51	0	143	84	77	74	0	0	52	0	0	1.38164	1.24568	0.776267	0.928541	0.916889	1.0139	1.06601	1.11847	0.858504	1.01295	1.08508	0.703756	0.726249	0.908033	0.929964	1.39071
1158	Smar_temp_008202:	22809	787	3467	7057	3932	7566	756	607	0	2	3124	1027	1059	1189	784	540	1	2224	1510	1846	799	0	2728	1293	1044	1084	0	0	1188	1	2	1.01561	1.24943	0.8705	0.973269	0.950068	0.97736	1.11532	1.33686	0.910842	1.2054	1.02469	0.89301	0.78859	1.15772	0.942574	1.24476
1159	Smar_temp_011036:	6884	0	1098	2216	1346	2224	289	130	0	0	837	326	430	420	0	191	0	669	497	560	245	0	784	451	332	330	0	0	392	0	0	0.605532	1.09905	0.992418	0.939305	0.934464	0.969338	1.09812	1.14119	0.901461	1.27598	1.09061	0.919012	0.782212	1.14292	0.930289	1.16492
1160	Smar_temp_003888:	45568	0	7402	14571	8260	15335	1668	949	0	0	6094	2288	2396	2434	0	1309	0	4285	3247	3659	1490	0	5621	2856	2268	2335	0	0	2668	0	0	0.707289	1.20641	0.907146	0.958219	0.873852	0.921534	1.11403	1.1105	0.959803	1.20665	1.08868	0.918508	0.74619	1.1681	0.937376	1.18085
1161	Smar_temp_005179:	2995	0	518	952	634	891	133	165	0	0	329	126	168	206	0	82	0	266	168	250	125	0	350	145	167	144	0	0	170	0	0	1.50474	1.15662	0.833643	1.01425	0.939212	1.0222	0.990992	1.13996	0.90132	0.880639	0.915274	0.817636	0.882718	0.890716	0.934441	1.24119
1162	Smar_temp_011582:	607	0	92	214	126	175	20	17	0	0	61	21	44	46	0	15	0	58	45	40	25	0	88	39	23	29	0	0	35	0	0	0.890183	1.16639	0.990506	0.709112	0.94008	1.03553	0.764676	1.30909	0.963492	1.20241	1.07573	0.791739	0.648331	1.23878	1.09335	1.20904
1163	Smar_temp_007118:	3721	0	639	1193	685	1204	119	128	0	0	486	185	193	247	0	109	0	352	245	259	138	0	469	217	178	214	0	0	181	0	0	1.08812	1.22617	0.878792	0.868837	0.911875	1.12467	0.943682	1.17313	0.816622	1.0592	0.993309	0.894755	0.670954	1.10537	1.03501	1.24751
1164	Smar_temp_007950:	1258	0	165	447	190	456	33	38	0	0	210	43	58	67	0	19	0	144	61	136	30	0	178	65	67	49	0	0	59	0	0	1.52485	1.12069	0.859108	1.14278	0.888732	0.992417	1.14997	1.20383	0.856671	1.10867	0.877943	0.718953	0.839358	0.885711	0.819272	1.27049
1165	Smar_temp_001992:	4514	0	643	1406	833	1632	163	90	0	0	695	194	230	243	0	80	0	475	350	388	158	0	496	279	205	199	0	0	268	0	0	0.758487	1.13259	0.88646	1.02357	0.934436	0.936564	1.06037	1.33157	0.889879	1.39306	0.873433	0.834511	0.763287	1.16216	0.856019	1.17789
1166	Smar_temp_010483:	8912	0	1345	3006	1702	2859	316	243	0	0	1085	373	518	574	0	185	0	878	625	683	289	0	1204	544	406	465	0	0	523	0	0	0.946018	1.18747	0.902311	0.894932	0.910472	0.999858	0.972172	1.1251	0.957862	1.19912	0.911386	0.864465	0.70826	1.14467	1.07768	1.18298
1167	Smar_temp_012623:	597	0	152	176	117	152	23	21	0	0	41	35	33	40	0	39	0	48	40	24	26	0	54	57	40	47	0	0	28	0	0	0.70496	1.04074	0.956731	0.892644	1.07117	1.15967	1.00307	0.872807	0.939946	1.27202	1.00775	0.904389	0.535586	1.34278	1.21447	1.05943
1168	Smar_temp_007195:	3766	0	513	1259	644	1350	118	94	0	0	606	153	182	247	0	68	0	405	250	327	93	0	487	198	184	167	0	0	186	0	0	1.07153	1.15707	0.845357	1.07289	0.897379	1.14727	1.0715	1.06013	0.8057	1.15452	0.973093	0.831995	0.72455	1.08293	0.908125	1.25223
1169	Smar_temp_001818:	10832	0	1955	3446	1799	3632	355	387	0	0	1474	518	439	502	0	344	0	1099	618	871	401	0	1367	706	540	669	0	0	541	0	0	1.19191	1.24694	0.767055	0.868241	0.951142	0.877134	1.18816	1.23502	0.896869	1.13514	0.97493	0.790216	0.753817	1.02452	1.02057	1.21036
1170	Smar_temp_002498:	26100	20	4384	7972	4557	9167	924	755	0	0	4077	1313	1170	1427	19	791	1	2436	1707	1818	865	0	3201	1525	1164	1564	0	0	1341	1	0	0.986366	1.31459	0.840582	0.869272	0.870008	1.02522	1.16133	1.13007	0.837844	1.13887	1.07418	0.852722	0.649292	1.06652	1.01573	1.26627
1171	Smar_temp_008567:	3562	0	830	1088	689	955	220	75	0	0	317	189	204	153	0	230	0	281	190	209	149	0	390	336	212	239	0	0	167	0	0	0.467152	1.17355	0.96934	0.836224	0.963314	0.727005	1.65074	0.928075	0.90404	1.32534	1.18923	0.849326	0.716486	1.02855	1.07402	1.23807
1172	Smar_temp_013059:	825	0	149	264	167	245	28	48	0	0	114	19	41	65	0	23	0	72	50	45	34	0	94	59	56	36	0	0	40	0	0	1.59145	1.11269	0.767216	1.1745	0.918367	1.21632	0.828284	1.12728	0.80655	1.23742	0.854691	0.429393	0.57398	1.00819	0.813587	1.56685
1173	Smar_temp_005563:	8797	0	1526	2867	1598	2806	294	252	0	0	1209	431	465	566	0	291	0	765	587	623	336	0	1125	552	512	387	0	0	401	0	0	0.909084	1.20401	0.892859	1.02949	0.836528	1.08679	1.01281	1.21211	0.78671	1.10992	1.09931	0.885461	0.681251	1.15162	0.795066	1.35078
1174	Smar_temp_011267:	947	0	185	332	125	305	14	17	0	0	108	51	35	45	0	37	0	105	58	77	25	0	130	80	62	61	0	0	41	0	0	0.696173	1.11691	0.798675	0.955943	0.981977	1.02687	0.848512	1.02378	1.01841	1.23347	1.02378	0.85595	0.720117	1.44068	1.02378	1.09945
1175	Smar_temp_011927:	15803	20	2901	5285	2639	4958	492	552	0	1	1975	759	733	803	19	565	1	1464	862	1231	585	0	2226	1025	861	889	0	0	759	0	0	1.13944	1.25943	0.830537	0.887462	0.882936	0.909852	1.11642	1.20756	0.916717	1.0565	1.06094	0.833925	0.742414	1.04112	0.976758	1.26968
1176	Smar_temp_000350:	26838	20	4135	8382	4821	9480	903	645	0	0	4118	1304	1338	1452	19	674	0	2550	1934	2149	957	0	3268	1512	1225	1279	0	1	1508	1	0	0.868355	1.24835	0.888631	0.948556	0.86126	0.964344	1.04271	1.2884	0.885536	1.17079	1.05794	0.892779	0.725823	1.13569	0.875663	1.22976
1177	Smar_temp_007443:	1176	0	223	315	280	358	61	104	0	0	132	42	44	84	0	29	0	107	71	79	58	0	103	48	60	76	0	0	77	0	0	1.95874	1.22074	0.586667	1.00448	1.11583	1.12	0.915	1.09238	0.903352	0.803587	0.685797	0.618684	0.823836	0.832961	1.11952	1.2112
1178	Smar_temp_004064:	647	0	132	225	135	155	35	34	0	0	58	24	42	60	0	25	0	51	24	27	18	0	88	49	43	46	0	0	22	0	0	1.23446	1.12466	0.894617	0.936734	0.946151	1.27802	1.24252	0.653535	0.680239	1.06744	0.928317	0.758944	0.500903	0.742079	1.45464	1.56196
1179	Smar_temp_000151:	1306	0	202	491	261	352	38	41	0	0	101	54	85	119	0	17	0	146	96	92	53	0	191	89	69	63	0	0	51	0	0	1.01563	1.0347	0.866244	0.908572	1.10324	1.21274	0.728527	1.31289	0.724987	1.17193	0.544113	0.991843	0.695195	1.36468	1.15715	1.06458
1180	Smar_temp_008709:	25827	20	3904	8332	4443	9128	770	638	0	1	3927	1147	1257	1391	19	621	0	2548	1778	2203	778	0	3240	1498	1286	1219	0	0	1504	0	1	0.949967	1.20537	0.876968	1.02107	0.865264	0.970455	1.00742	1.15842	0.957789	1.1894	1.05232	0.831289	0.748107	1.13228	0.883471	1.21726
1181	Smar_temp_012837:	4078	0	687	1375	667	1349	126	93	0	0	531	199	189	235	0	92	0	419	259	326	106	0	512	302	255	233	0	0	200	0	0	0.827652	1.10436	0.840389	1.10085	0.921184	1.04493	1.15496	0.943345	0.906441	1.30375	0.794917	0.875652	0.716721	1.17384	1.02526	1.18992
1182	Smar_temp_000406:	6664	0	1037	2079	1199	2349	249	209	0	0	1019	248	243	390	0	197	0	714	498	498	192	0	808	382	314	334	0	0	368	0	0	1.12017	1.24577	0.649632	0.97058	0.974307	1.04262	1.15424	1.02905	0.870724	1.18077	1.2208	0.678461	0.679558	1.17832	0.913734	1.23067
1183	Smar_temp_007009:	9277	0	1582	3046	1768	2881	326	373	0	0	1154	367	468	591	0	275	0	880	601	663	372	0	1225	567	472	463	0	0	479	0	0	1.23717	1.22485	0.806197	0.908685	0.930287	1.01808	0.967522	1.23385	0.872404	1.09158	1.01936	0.747006	0.700887	1.0946	0.942408	1.28981
1184	Smar_temp_009269:	4735	0	718	1623	923	1471	165	208	0	0	620	136	245	353	0	132	0	466	305	344	156	0	685	241	227	202	0	0	249	0	0	1.48613	1.23133	0.774401	0.922365	0.924219	1.11577	0.917066	1.1146	0.86837	0.979251	1.2124	0.609708	0.682256	1.06367	0.905595	1.35671
1185	Smar_temp_001323:	5644	48	1252	1521	1078	1745	226	353	0	0	757	250	223	290	47	313	1	443	276	348	267	0	546	336	309	362	0	0	295	1	0	1.47618	1.33205	0.767616	0.915824	0.942033	0.998245	1.09763	1.11654	0.885105	0.995847	1.127	0.645843	0.740017	0.828098	0.935181	1.40311
1186	Smar_temp_008262:	1058	0	193	346	188	331	34	48	0	0	121	46	42	58	0	38	0	107	64	99	39	0	128	61	69	47	0	0	56	0	0	1.39963	1.13121	0.683126	1.0932	0.988474	0.943365	1.01777	1.1372	0.952112	0.966456	1.07933	0.76183	0.91457	1.08813	0.778392	1.16846
1187	Smar_temp_001667:	3402	0	572	1041	738	1051	160	140	0	0	398	134	186	236	0	112	0	318	252	230	141	0	389	185	148	171	0	0	201	0	0	1.12826	1.22119	0.823645	0.845569	0.988799	1.04506	0.999405	1.13632	0.881599	1.05696	1.16456	0.758299	0.715169	1.10529	0.96768	1.22578
1188	Smar_temp_002168:	6220	20	865	2117	977	2241	177	193	0	0	1069	211	228	306	19	133	0	643	378	540	176	0	942	328	302	254	0	0	318	1	1	1.42049	1.30737	0.685662	1.02579	0.843021	0.92023	1.15339	1.29537	0.903402	1.11411	1.10563	0.677041	0.707981	1.07386	0.815016	1.32399
1189	Smar_temp_007037:	708	0	120	313	150	125	38	0	0	0	39	5	38	35	0	40	0	42	74	12	38	0	190	75	42	0	0	0	39	0	0	0	1.37309	0.573035	0.791693	0.760026	0.527796	1.19573	1.49467	1.47264	1.41374	1.96667	0.236	0.21715	2.79424	0	1.76717
1190	Smar_temp_011827:	6704	0	969	2198	1203	2334	227	152	0	0	978	345	364	370	0	129	0	649	460	592	244	0	892	343	292	304	0	0	362	0	0	0.874154	1.23778	0.922873	0.919106	0.848106	0.938085	1.05155	1.40325	0.864323	1.07963	0.921035	1.02265	0.773619	1.09831	0.901121	1.20357
1191	Smar_temp_001393:	1927	0	360	592	364	611	74	39	0	0	238	87	97	106	0	73	0	185	154	130	83	0	194	161	115	89	0	0	101	0	0	0.573512	1.06669	0.867422	1.03981	0.985577	0.947904	1.07624	1.22055	0.875106	1.45574	1.08542	0.762179	0.692568	1.33432	0.779701	1.2285
1192	Smar_temp_002421:	438	0	80	132	70	156	6	15	0	0	65	12	18	27	0	15	0	54	31	32	11	0	34	38	26	28	0	0	25	0	0	1.17321	0.854683	0.853247	1.07841	1.1486	1.27987	0.536327	0.860357	1.00275	1.57614	1.02656	0.421154	0.680653	1.24341	0.982692	1.16987
1193	Smar_temp_003904:	2426	0	343	868	381	834	47	57	0	0	355	100	114	118	0	51	0	240	163	227	77	0	387	135	126	89	0	0	139	0	0	1.05815	1.24613	0.836279	1.02671	0.804297	0.865622	0.785486	1.42943	1.06124	1.10005	1.05165	0.848068	0.760731	1.24448	0.75478	1.23819
1194	Smar_temp_004780:	12778	0	2215	4021	2504	4038	459	649	0	0	1638	528	577	876	0	401	0	1170	819	839	466	0	1668	637	606	742	0	0	702	0	0	1.4952	1.31823	0.732268	0.869416	0.920764	1.11173	0.935421	1.0736	0.887155	0.913891	1.04438	0.754322	0.660274	1.03501	1.06005	1.28364
1195	Smar_temp_009509:	19771	0	3179	6452	3568	6572	688	506	0	0	2661	951	994	1156	0	522	0	1944	1380	1547	708	0	2550	1199	964	984	0	0	1016	0	0	0.88199	1.2111	0.853681	0.929225	0.906427	0.992813	1.06848	1.23409	0.856643	1.15575	1.02122	0.899956	0.721318	1.16355	0.931184	1.21809
1196	Smar_temp_002794:	3934	0	737	1241	700	1256	142	122	0	0	467	228	183	191	0	142	0	355	253	322	161	0	483	245	220	214	0	0	205	0	0	0.930312	1.23378	0.828735	0.946276	0.895986	0.864964	1.14006	1.22771	0.917277	1.05381	1.02846	0.968974	0.812697	1.13205	0.909475	1.16459
1197	Smar_temp_006852:	3225	0	568	1064	563	1030	122	79	0	0	401	125	156	160	0	122	0	313	206	226	90	0	435	242	159	197	0	0	191	0	0	0.79671	1.23918	0.839855	0.848471	0.921075	0.86139	1.24129	0.907644	1.06223	1.29138	1.21953	0.689055	0.665058	1.14565	1.08595	1.21899
1198	Smar_temp_009838:	5935	0	1126	1706	1328	1775	359	321	0	0	742	223	273	400	0	252	0	507	375	335	265	0	640	330	286	323	0	0	303	0	0	1.27406	1.3051	0.715165	0.883628	0.993691	1.04786	1.20814	1.05179	0.762899	1.01957	1.17963	0.662199	0.656581	0.944182	0.95915	1.39774
1199	Smar_temp_009368:	994	0	177	330	178	309	37	34	0	0	117	44	35	62	0	42	0	97	72	71	28	0	139	57	58	49	0	0	51	0	0	1.07268	1.26874	0.592271	0.987023	0.945553	1.04917	1.16078	0.883387	0.921676	0.970005	1.33257	0.799664	0.692106	1.30119	0.890534	1.21802
1200	Smar_temp_004120:	6537	0	975	2116	1191	2255	227	175	0	0	944	286	339	400	0	161	0	683	450	574	222	0	788	353	305	287	0	0	342	0	0	0.985145	1.15046	0.879328	0.966403	0.935701	1.03755	1.04612	1.24973	0.832427	1.11849	1.10712	0.850341	0.786372	1.0953	0.853315	1.21355
1201	Smar_temp_001168:	3107	20	547	973	716	851	181	116	0	0	280	149	195	244	19	101	0	246	224	195	115	0	351	181	179	152	0	0	176	1	1	0.920235	1.15192	0.869661	1.04495	0.923069	1.08819	1.09697	0.912302	0.897452	1.05662	1.04879	0.994513	0.731701	1.14221	1.01454	1.20127
1202	Smar_temp_008154:	2969	0	420	1088	524	937	105	94	0	0	390	97	163	196	0	69	0	304	162	255	77	0	476	160	144	130	0	0	146	0	0	1.26811	1.19388	0.848863	0.935609	0.885351	1.02072	1.13537	1.03877	0.882861	1.03957	1.16134	0.731801	0.742646	0.979613	0.980764	1.31885
1203	Smar_temp_007800:	5621	0	962	1894	1012	1753	209	217	0	0	663	257	267	341	0	185	0	562	319	467	191	0	783	303	281	304	0	0	271	0	0	1.2529	1.22692	0.783005	0.866892	0.951454	1.00002	1.14709	1.10279	0.858658	0.934762	1.12366	0.856623	0.790621	1.01075	1.01328	1.21273
1204	Smar_temp_008434:	7472	0	1262	2381	1412	2417	292	261	0	0	921	351	377	437	0	215	0	723	482	604	261	0	905	434	376	410	0	0	422	0	0	1.09442	1.1928	0.837884	0.934988	0.938727	0.971235	1.09434	1.09442	0.923928	1.07921	1.00869	0.859821	0.78422	1.05529	1.00435	1.17799
1205	Smar_temp_012750:	3237	139	621	922	587	968	111	128	1	0	349	169	139	161	138	129	0	270	208	227	135	0	340	194	172	184	1	0	180	0	0	1.13664	1.29467	0.831359	0.972408	0.979265	0.962941	1.04277	1.1988	1.02542	1.09679	1.0828	0.910044	0.823308	1.18493	0.990817	1.20564
1206	Smar_temp_004148:	9478	0	1447	3154	1552	3325	259	238	0	0	1375	464	479	500	0	210	0	997	576	894	304	0	1224	535	454	479	0	0	489	0	0	1.00446	1.1662	0.927468	0.942849	0.90107	0.968129	1.01914	1.28301	0.898136	1.11107	0.950602	0.91406	0.807981	1.05793	0.943609	1.17879
1207	Smar_temp_012138:	6264	40	1046	2000	1141	2037	205	197	0	0	804	310	321	334	38	161	1	572	418	511	251	2	777	378	329	303	0	1	350	0	0	1.03395	1.21678	0.881132	0.985113	0.879482	0.916817	0.986357	1.31737	0.943285	1.13183	0.921752	0.911362	0.785691	1.12655	0.890782	1.21374
1208	Smar_temp_000379:	1652	0	259	445	333	615	73	54	0	0	256	71	66	76	0	53	0	161	140	145	57	0	142	81	75	74	0	0	127	0	0	1.03433	1.18462	0.735783	1.07501	0.971853	0.847265	1.08754	1.09179	1.02446	1.16101	1.30523	0.736366	0.875272	1.12932	0.76748	1.11815
1209	Smar_temp_002355:	4829	0	655	1584	723	1867	138	97	0	0	886	186	189	204	0	102	0	548	299	461	134	0	648	270	198	221	0	0	247	0	0	0.989121	1.24716	0.79694	0.921565	0.894825	0.860189	1.27485	1.36641	0.883632	1.25668	1.14809	0.734488	0.752764	1.06966	0.872698	1.22745
1210	Smar_temp_001185:	10967	162	2441	2457	2549	3358	606	725	0	0	1401	571	482	642	160	619	2	705	736	482	620	0	804	526	465	737	0	0	681	2	0	1.27787	1.46061	0.844034	0.850292	0.937111	1.12421	1.02287	1.0928	0.872538	0.961835	1.13931	0.763969	0.640692	0.943007	0.986068	1.36259
1211	Smar_temp_005544:	6282	0	1151	2173	886	2072	141	155	0	0	886	313	254	268	0	218	0	610	336	507	214	0	933	464	376	343	0	0	263	0	0	0.954818	1.24125	0.828778	0.944389	0.851095	0.874459	1.12836	1.31826	0.899975	1.16542	1.03372	0.824474	0.707386	1.14978	0.903498	1.29644
1212	Smar_temp_008355:	4270	0	653	1494	762	1361	115	96	0	0	539	175	234	280	0	90	0	413	317	315	133	0	606	292	240	190	0	0	234	0	0	0.823817	1.15931	0.877684	1.05045	0.8673	1.05022	0.845699	1.14133	0.963453	1.27805	0.901247	0.840804	0.6615	1.30519	0.912873	1.24251
1213	Smar_temp_009407:	5781	0	983	1939	937	1922	164	205	0	0	826	234	248	335	0	165	0	587	320	457	163	0	767	379	336	319	0	0	275	0	0	1.28666	1.17935	0.789109	1.01909	0.910563	1.06593	1.07986	1.02305	0.88276	1.1495	0.987143	0.715998	0.708905	1.02721	0.976083	1.29264
1214	Smar_temp_003739:	1783	0	277	601	285	620	47	38	0	0	266	83	80	94	0	44	0	186	120	150	60	0	245	112	89	84	0	0	84	0	0	0.858243	1.2094	0.832764	0.953207	0.890017	0.978498	1.03171	1.35512	0.847606	1.19954	1.02246	0.861704	0.717755	1.21087	0.872086	1.23381
1215	Smar_temp_005128:	3803	0	687	1300	588	1228	93	136	0	0	483	196	156	200	0	119	0	395	203	314	142	0	550	236	198	228	0	0	153	0	0	1.28036	1.23766	0.776122	0.843124	0.940983	0.995029	1.02295	1.33684	0.805827	1.00494	0.95887	0.883542	0.748022	1.06917	1.02779	1.21808
1216	Smar_temp_012730:	2612	0	438	851	432	891	75	81	0	0	426	110	163	111	0	90	0	202	113	235	92	0	347	157	139	117	0	0	153	0	0	1.11815	1.25154	1.1581	0.974057	0.695853	0.788647	1.0497	1.27	1.03825	1.10019	1.22537	0.736231	0.809532	0.766814	0.783082	1.40161
1217	Smar_temp_009713:	19441	0	3342	6487	3818	5794	724	677	0	0	2225	828	1229	1383	0	632	0	1694	1187	1335	664	0	2564	1205	999	1047	0	0	1047	0	0	1.03149	1.18454	0.964696	0.895847	0.876213	1.08558	0.965573	1.01168	0.920134	1.08058	1.10008	0.831312	0.690522	1.04317	1.05119	1.28852
1218	Smar_temp_011201:	19147	939	2903	5641	3353	6311	618	651	0	1	2822	812	860	1069	937	454	2	1714	1223	1358	703	0	2227	986	840	906	1	0	962	0	0	1.28056	1.34001	0.870582	0.982148	0.921844	1.08215	1.0525	1.38285	0.87045	1.15285	1.03148	0.848617	0.730376	1.10661	0.946856	1.35663
1219	Smar_temp_008405:	3519	0	489	1180	672	1178	132	90	0	0	467	144	192	221	0	68	0	365	258	313	117	0	458	187	164	140	0	0	202	0	0	0.963793	1.1575	0.852058	1.00017	0.924027	0.980754	1.02862	1.25293	0.897958	1.14043	1.00072	0.879686	0.792385	1.1469	0.85525	1.18426
1220	Smar_temp_002542:	1522	0	245	580	211	486	26	37	0	0	176	75	71	63	0	31	0	156	77	160	43	0	254	102	98	73	0	0	79	0	0	1.08935	1.14919	0.883004	1.04966	0.842316	0.78351	0.888839	1.266	1.17253	1.0925	0.786039	0.95868	0.863914	1.14284	0.933115	1.13411
1221	Smar_temp_005102:	2182	0	356	707	366	753	70	55	0	0	302	103	96	133	0	58	0	244	145	189	60	0	245	140	122	116	0	0	103	0	0	0.921057	1.0695	0.809516	1.05766	1.00007	1.12152	1.14023	1.00479	0.815485	1.21371	0.99858	0.838392	0.774644	1.14801	0.944208	1.16218
1222	Smar_temp_006341:	18465	20	2861	5829	3205	6550	555	448	0	0	2808	918	891	997	19	402	1	1813	1311	1495	642	1	2243	1093	881	935	0	0	1011	0	0	0.902156	1.21896	0.880653	0.975469	0.876823	0.985422	0.997668	1.29282	0.889265	1.2102	0.906859	0.904551	0.723028	1.15314	0.921301	1.20855
1223	Smar_temp_005074:	1249	0	178	427	238	406	51	27	0	0	159	56	81	88	0	28	0	130	79	112	38	0	160	67	55	56	0	0	61	0	0	0.79603	1.09604	0.995503	0.90381	0.936595	1.08153	1.12455	1.12034	0.788477	1.10101	1.10377	0.967842	0.806913	1.02114	0.967842	1.20478
1224	Smar_temp_005706:	3070	20	537	1071	510	932	128	99	0	0	380	135	140	146	19	122	0	285	143	245	104	0	497	181	147	164	0	0	132	1	1	1.10976	1.3302	0.786877	0.784679	0.876552	0.8206	1.5108	1.16581	0.852562	0.966169	1.29882	0.828098	0.753527	0.923609	1.00599	1.34304
1225	Smar_temp_005481:	3054	0	503	1040	477	1034	85	75	0	0	440	133	145	151	0	92	0	312	172	283	92	0	402	203	180	139	0	0	149	0	0	0.954649	1.13509	0.892658	1.05085	0.886074	0.929596	1.14091	1.17104	0.922606	1.18512	1.11051	0.780966	0.803714	1.06502	0.816198	1.25684
1226	Smar_temp_008998:	12650	0	1923	3958	2139	4630	395	340	0	0	2105	534	556	712	0	322	0	1325	848	1005	366	0	1515	726	562	672	0	0	666	0	0	1.04563	1.22335	0.830766	0.934054	0.914639	1.06386	1.09211	1.12559	0.850693	1.20662	1.10151	0.758702	0.693745	1.08316	0.954772	1.24217
1227	Smar_temp_000033:	818	0	97	121	251	349	75	23	0	0	148	44	31	37	0	10	0	48	122	35	30	0	28	20	13	44	0	0	109	0	0	0.772744	1.56437	0.834941	0.906024	0.929788	0.996543	0.973794	1.00793	1.01784	1.39388	0.86938	1.06318	0.67797	1.13924	1.06318	0.993949
1228	Smar_temp_005014:	2957	0	442	958	513	1044	100	45	0	0	444	135	137	155	0	69	0	297	230	238	90	0	372	193	151	132	0	0	168	0	0	0.586846	1.19857	0.824307	1.05449	0.878096	0.93261	1.12361	1.17369	0.927562	1.34779	1.04437	0.865092	0.703659	1.26988	0.845868	1.20457
1229	Smar_temp_008129:	581	0	75	209	104	193	20	6	0	0	81	18	36	42	0	13	0	65	42	38	13	0	90	38	17	32	0	0	29	0	0	0.446923	1.19709	0.962275	0.630112	0.936237	1.12265	1.07433	0.968333	0.839428	1.40848	1.34276	0.722487	0.547339	1.21572	1.28442	1.26342
1230	Smar_temp_013138:	2841	0	470	934	538	899	114	126	0	0	354	115	126	190	0	87	0	284	172	226	88	0	375	142	148	147	0	0	146	0	0	1.41567	1.22126	0.712381	0.95783	0.960911	1.07423	1.11895	0.988721	0.857595	0.918999	1.11891	0.773235	0.764668	1.01032	0.988396	1.24439
1231	Smar_temp_002209:	2756	0	378	911	424	1043	82	47	0	0	450	137	120	127	0	43	0	313	174	288	72	0	345	151	132	131	0	0	143	0	0	0.808201	1.14568	0.856202	1.05644	0.907864	0.906147	1.25708	1.2381	0.891179	1.2085	0.8294	0.957687	0.835351	1.08437	0.915745	1.14005
1232	Smar_temp_008678:	1305	0	227	382	331	365	73	74	0	0	123	43	65	115	0	41	0	114	119	59	58	0	138	69	64	64	0	0	85	0	0	1.28525	1.23414	0.670861	0.963166	1.06699	1.18691	0.869516	1.00736	0.918139	1.03841	1.03835	0.677268	0.552213	1.2854	1.00803	1.20484
1233	Smar_temp_012144:	617	0	85	204	111	217	11	29	0	0	103	22	30	63	0	13	0	65	41	35	10	0	84	21	24	38	0	0	27	0	0	1.89645	1.24539	0.817435	0.853979	0.905959	1.71661	0.550848	0.653948	0.691618	0.747232	1.11017	0.735918	0.487824	1.05023	1.27113	1.34959
1234	Smar_temp_001099:	2540	0	596	751	477	716	80	171	0	0	258	123	118	151	0	129	0	214	107	163	125	0	264	173	155	187	0	0	121	0	0	1.5278	1.18893	0.836676	0.879588	1.01087	1.07066	0.893073	1.11681	0.899886	0.981734	0.922425	0.732115	0.76996	0.795767	1.11305	1.27828
1235	Smar_temp_012067:	35837	21	5264	11489	6520	12543	1282	1041	0	1	5567	1471	1792	2079	19	880	2	3481	2404	2887	1137	0	4651	1872	1565	1682	1	0	2022	0	0	1.08697	1.26274	0.857314	0.927359	0.865669	0.994618	1.08075	1.18721	0.886061	1.10928	1.13811	0.798412	0.717951	1.05346	0.912936	1.26809
1236	Smar_temp_008022:	1695	0	268	601	282	544	48	43	0	0	208	69	90	91	0	37	0	170	101	144	45	0	247	119	94	91	0	0	97	0	0	0.964393	1.15909	0.900096	0.98921	0.881344	0.910097	1.02309	1.00925	1.07175	1.2523	0.873176	0.802205	0.74655	1.11595	1.05798	1.19134
1237	Smar_temp_008389:	981	0	160	304	155	362	31	5	0	0	144	68	47	35	0	26	0	88	72	91	27	0	117	60	52	55	0	0	62	0	0	0.197782	1.24196	0.978502	1.04877	0.784458	0.728671	1.26581	1.06802	1.08398	1.21012	0.996328	1.15173	0.811201	1.25881	0.931544	1.07799
1238	Smar_temp_011560:	8515	0	1397	2629	1575	2914	286	273	0	0	1235	434	460	478	0	203	0	755	555	665	321	0	999	487	415	458	0	0	490	0	0	1.0565	1.23075	0.945957	0.962157	0.839173	0.982973	0.981724	1.24226	0.909098	1.12908	0.885703	0.907796	0.739139	1.02969	0.957997	1.23843
1239	Smar_temp_011671:	38697	0	6613	11761	7257	13066	1377	1443	0	0	5794	1888	1989	2398	0	1072	0	3412	2448	2567	1510	0	4585	2210	1775	2256	0	0	1972	0	0	1.16356	1.28271	0.901801	0.883147	0.85921	1.08724	1.01181	1.21758	0.804793	1.09958	0.948582	0.845548	0.646422	0.999054	1.01036	1.31332
1240	Smar_temp_010232:	1216	0	173	508	225	310	42	24	0	0	96	33	99	111	0	28	0	136	60	104	27	0	204	88	68	50	0	0	45	0	0	0.74975	0.96125	1.05323	0.940877	1.05014	1.18089	1.00883	0.843468	0.784516	1.21761	1.13763	0.748238	0.803048	1.04602	1.13369	1.21473
1241	Smar_temp_011616:	10694	0	1794	3255	1903	3742	335	266	0	0	1533	516	471	496	0	347	0	1006	831	846	385	0	1248	664	530	532	0	0	687	0	0	0.833222	1.25966	0.813151	0.970605	0.883249	0.856312	0.989253	1.20598	1.0317	1.216	1.15299	0.821985	0.742772	1.24795	0.847472	1.17078
1242	Smar_temp_010240:	2356	0	395	811	429	721	84	71	0	0	256	95	128	139	0	73	0	250	146	192	85	0	323	156	110	127	0	0	120	0	0	0.987141	1.15701	0.866776	0.809003	1.0073	0.941265	1.07533	1.18179	0.914037	1.14731	1.10231	0.785899	0.773607	1.11208	1.05062	1.16023
1243	Smar_temp_002591:	1940	0	330	614	332	664	35	61	0	0	295	107	77	95	0	35	0	158	159	130	97	0	261	127	118	80	0	0	104	0	0	1.08014	1.34309	0.732801	1.1298	0.751835	0.904105	0.616018	1.7176	0.915227	1.21597	0.623508	0.947335	0.618598	1.39924	0.708288	1.29804
1244	Smar_temp_004905:	1996	20	303	689	390	594	79	29	0	1	223	89	131	138	19	49	0	189	151	133	80	0	281	136	87	87	0	1	92	0	0	0.489837	1.18149	0.973079	0.831798	0.921757	1.02508	1.03671	1.35127	0.792679	1.30028	1.0653	0.98701	0.648644	1.30103	0.96483	1.26152
1245	Smar_temp_007313:	9047	0	1457	2857	1681	3052	338	283	0	0	1196	422	426	524	0	266	0	896	633	738	281	0	1109	486	425	485	0	0	538	0	0	1.04535	1.22918	0.802484	0.923685	0.929646	0.987093	1.08215	1.03797	0.948713	1.05626	1.13362	0.858565	0.765713	1.11624	0.986739	1.16163
1246	Smar_temp_003537:	1127	0	172	388	206	361	34	42	0	0	139	42	56	75	0	21	0	126	74	99	44	0	147	67	58	49	0	0	53	0	0	1.33591	1.10047	0.789611	0.979471	1.01381	1.05751	0.90296	1.39953	0.803203	1.13146	0.799993	0.76232	0.796563	1.12145	0.889374	1.20205
1247	Smar_temp_008885:	24054	60	4026	7208	4674	8086	931	1066	0	3	3579	940	1116	1522	57	734	2	2172	1561	1609	828	0	2791	1286	1128	1335	0	1	1392	0	0	1.36264	1.29216	0.796798	0.934992	0.896393	1.08667	1.02508	1.05841	0.88594	1.06596	1.08927	0.694557	0.664041	0.9935	0.986418	1.31668
1248	Smar_temp_002965:	3441	0	585	1113	490	1253	68	74	0	0	529	205	136	141	0	76	0	337	212	310	99	0	433	229	207	202	0	0	182	0	0	0.88831	1.20277	0.858089	1.09397	0.831512	0.889636	0.974544	1.18841	1.02002	1.21023	0.764164	0.962347	0.764892	1.18816	0.948264	1.15941
1249	Smar_temp_010084:	1018	0	164	350	172	332	38	16	0	0	121	42	48	57	0	32	0	120	70	86	28	0	132	74	49	55	0	0	49	0	0	0.577425	1.09695	0.811694	0.869024	1.05129	0.963887	1.3076	1.01049	0.873529	1.3124	1.21118	0.785263	0.753425	1.2479	1.02832	1.11752
1250	Smar_temp_005366:	2930	0	468	958	479	1025	86	90	0	0	439	121	135	151	0	82	0	313	168	279	90	0	353	174	157	139	0	0	152	0	0	1.17633	1.12697	0.861986	1.02602	0.933948	0.964148	1.09823	1.17633	0.907093	1.13712	1.09696	0.739066	0.832497	1.00258	0.84901	1.22429
1251	Smar_temp_011955:	1745	0	336	559	351	499	67	55	0	0	187	82	119	121	0	72	0	136	110	113	69	0	197	127	106	89	0	0	94	0	0	0.813789	1.10011	1.05834	0.984805	0.850789	1.07612	0.948978	1.02094	0.936517	1.17991	1.11288	0.853433	0.706906	1.09592	0.926287	1.3105
1252	Smar_temp_000485:	706	0	130	228	164	184	36	18	0	0	43	41	50	63	0	27	0	60	60	44	25	0	76	44	41	37	0	0	40	0	0	0.59606	1.03216	0.944052	0.976586	1.00973	1.18951	0.944973	0.827861	0.935843	1.04804	1.12793	1.21012	0.740465	1.40376	1.09206	0.89668
1253	Smar_temp_010533:	16220	0	3020	4866	2842	5492	520	394	0	0	2219	892	843	790	0	670	0	1424	1085	1189	575	0	1823	1064	775	999	0	0	957	0	0	0.744588	1.2488	0.98874	0.855408	0.864287	0.926578	1.04425	1.08664	0.994508	1.17439	1.19155	0.872325	0.721656	1.12752	0.976965	1.19329
1254	Smar_temp_011347:	6171	0	1279	1833	1063	1996	169	282	0	0	814	320	248	330	0	281	0	549	364	390	251	0	716	396	319	428	0	0	313	0	0	1.27997	1.31505	0.785437	0.839679	0.925987	1.04514	0.922945	1.13927	0.910345	1.04236	1.06004	0.773525	0.657805	1.05868	1.03459	1.26084
1255	Smar_temp_010393:	19390	40	2834	6270	3273	6973	721	487	0	1	3259	758	840	1027	38	520	1	2009	1225	1595	578	0	2579	1068	842	893	0	1	946	1	0	1.01803	1.27202	0.793677	0.918803	0.890985	0.970364	1.30503	1.20826	0.803717	1.16542	1.2554	0.743751	0.707378	1.04075	0.876213	1.29964
1256	Smar_temp_008033:	1767	0	297	569	432	469	83	109	0	0	175	52	138	208	0	52	0	161	102	80	60	0	196	84	73	112	0	0	81	0	0	1.50115	1.06972	0.992018	0.763292	1.06605	1.49522	0.785864	0.826319	0.706423	0.878309	1.04166	0.659645	0.529714	0.88957	1.42077	1.40582
1257	Smar_temp_010310:	3862	0	592	1357	720	1193	126	115	0	0	465	148	229	293	0	75	0	383	250	269	104	0	540	254	204	209	0	0	197	0	0	1.04197	1.13252	0.905181	0.980711	0.913673	1.15816	0.938681	0.942305	0.885739	1.22108	0.826476	0.809304	0.641718	1.12403	1.14287	1.26178
1258	Smar_temp_012408:	387	0	61	132	63	131	13	9	0	0	59	14	20	21	0	13	0	44	21	28	15	0	57	25	10	23	0	0	14	0	0	0.906323	1.26601	0.930736	0.480626	0.984733	0.977273	1.26757	1.51054	0.656489	1.20156	1.35206	0.678013	0.626648	0.984733	1.11388	1.33052
1259	Smar_temp_006134:	603	0	115	170	111	207	23	27	0	0	83	28	22	26	0	25	0	58	39	48	23	0	60	35	30	37	0	0	38	0	0	1.27544	1.2519	0.703021	0.92532	0.993862	0.830843	1.12564	1.08649	0.997258	1.07954	1.13989	0.709263	0.822506	1.0235	0.93724	1.16803
1260	Smar_temp_010746:	1918	0	280	660	365	613	85	34	0	0	247	76	96	135	0	49	0	216	150	134	71	0	269	121	78	82	0	0	74	0	0	0.638082	1.18444	0.764334	0.809545	1.024	1.07484	1.22372	1.33247	0.634347	1.25583	1.19875	0.849266	0.635256	1.28584	0.916313	1.26074
1261	Smar_temp_010090:	3588	0	498	1291	659	1140	109	109	0	0	445	135	211	265	0	71	0	375	230	317	100	0	525	183	179	148	0	0	185	0	0	1.19169	1.13021	0.889863	0.998964	0.914224	1.1176	0.900551	1.0933	0.883556	1.02129	1.02719	0.853202	0.772824	1.09847	0.935363	1.22858
1262	Smar_temp_009326:	10231	0	1689	3255	1984	3303	402	556	0	0	1453	344	445	638	0	281	0	954	581	719	392	0	1390	508	465	550	0	0	552	0	0	1.69755	1.34224	0.704994	0.865347	0.907835	1.01076	1.04487	1.19683	0.861801	0.945369	1.00778	0.630868	0.684207	0.907077	1.00865	1.36259
1263	Smar_temp_012780:	1571	0	284	544	269	474	48	44	0	0	163	62	94	94	0	64	0	161	82	141	38	0	195	114	94	88	0	0	88	0	0	0.904812	1.03517	1.00914	0.955844	0.9809	1.00914	1.04211	0.781428	1.08425	1.15921	1.24658	0.723554	0.859049	1.01032	1.02698	1.13974
1264	Smar_temp_003987:	2237	0	333	720	484	700	98	98	0	0	252	69	116	154	0	49	0	225	172	163	78	0	285	117	93	113	0	0	154	0	0	1.3602	1.22983	0.74464	0.867705	0.998661	0.988573	0.935839	1.08261	1.01682	1.09163	0.988493	0.662175	0.723474	1.13567	1.08443	1.15046
1265	Smar_temp_011312:	1158	0	255	388	219	296	56	60	0	0	101	52	42	67	0	59	0	102	61	67	55	0	170	84	74	67	0	0	40	0	0	1.24416	1.30766	0.572377	0.866101	1.02846	0.913077	1.3521	1.14048	0.71455	0.983141	1.0507	0.797774	0.675554	1.08969	1.0279	1.33489
1266	Smar_temp_006993:	4356	0	733	1463	724	1436	107	135	0	0	584	192	209	243	0	128	0	422	273	341	136	0	601	278	231	238	0	0	237	0	0	1.1081	1.22313	0.859511	0.938321	0.874987	0.999335	0.88919	1.11631	0.992986	1.12924	1.03774	0.794567	0.707039	1.14382	0.984932	1.23365
1267	Smar_temp_001154:	1821	0	233	593	325	670	57	45	0	0	311	67	93	129	0	30	0	195	130	146	41	0	226	91	79	83	0	0	97	0	0	1.08214	1.17033	0.878729	1.04118	0.893748	1.21888	0.982693	0.985949	0.811192	1.19934	1.00628	0.781545	0.669165	1.08716	0.968183	1.2616
1268	Smar_temp_005252:	10493	0	1814	3491	1853	3335	336	381	0	0	1330	454	488	600	0	283	0	1001	648	778	368	0	1417	696	584	579	0	0	549	0	0	1.18936	1.22003	0.791579	0.967666	0.902169	0.973253	1.02681	1.14877	0.932182	1.15325	0.902426	0.787449	0.701187	1.10028	1.00426	1.25476
1269	Smar_temp_005828:	11469	0	2138	3877	1761	3693	239	369	0	0	1452	533	509	566	0	427	0	1165	644	991	414	0	1511	809	692	605	0	0	542	0	0	1.12405	1.15292	0.855043	0.957477	0.933204	0.950795	0.883903	1.26113	0.955842	1.11936	1.07137	0.774222	0.793824	1.13572	0.878808	1.22105
1270	Smar_temp_009417:	10550	21	1909	3504	1738	3378	321	256	1	2	1248	546	500	521	19	340	1	1022	660	875	336	0	1342	766	639	594	0	0	560	0	0	0.814023	1.15313	0.866181	1.00782	0.910919	0.90256	1.12114	1.06841	1.00631	1.20812	0.984282	0.893263	0.779896	1.18601	0.971792	1.15385
1271	Smar_temp_011370:	20120	0	3552	6613	3601	6354	736	519	0	0	2410	919	997	1107	0	659	0	1934	1349	1539	668	0	2512	1455	1170	1055	0	0	1090	0	0	0.816393	1.15571	0.842367	1.00217	0.926059	0.935307	1.14198	1.05077	0.958482	1.24629	1.05091	0.819263	0.736921	1.18623	0.940503	1.20102
1272	Smar_temp_006563:	751	0	146	223	144	238	28	29	0	0	84	36	41	40	0	24	0	76	46	54	33	0	71	57	35	54	0	0	42	0	0	1.03591	1.07223	0.958863	0.807328	1.0754	0.935476	1.01408	1.1788	0.920343	1.31479	0.845562	0.778059	0.764103	1.00799	1.16709	1.11369
1273	Smar_temp_012347:	2664	0	425	929	441	869	87	77	0	0	328	117	130	150	0	79	0	295	147	249	74	0	378	152	126	145	0	0	129	0	0	1.09445	1.1668	0.845324	0.850159	0.973466	0.975374	1.19173	1.05181	0.896738	1.02559	1.16515	0.84394	0.821671	1.02186	1.04591	1.15709
1274	Smar_temp_005978:	3325	0	496	1080	673	1076	82	101	0	0	326	95	120	230	0	72	0	438	370	227	144	0	395	228	127	152	0	0	217	0	0	1.00604	1.12601	0.548952	0.788297	1.25323	1.05216	0.601971	1.43436	0.996378	1.41521	0.973107	0.591863	0.649503	1.69889	0.946981	0.936235
1275	Smar_temp_008619:	16546	0	2346	5366	2818	6016	508	381	0	0	2597	706	794	851	0	359	0	1764	1135	1533	510	0	2082	899	726	751	0	0	949	0	0	0.953562	1.19639	0.868804	0.954225	0.904135	0.931174	1.05846	1.27642	0.926212	1.18161	1.07927	0.827679	0.785736	1.10775	0.880435	1.18727
1276	Smar_temp_004873:	6507	0	1095	2229	1098	2085	210	86	0	0	832	338	384	381	0	217	0	605	417	504	197	0	890	454	349	332	0	0	310	0	0	0.465439	1.1656	1.02094	0.930426	0.847071	1.01296	1.13343	1.06618	0.881118	1.21035	1.17764	0.963335	0.70566	1.18525	0.946234	1.24535
1277	Smar_temp_000588:	5451	0	742	1824	877	2008	147	171	0	0	932	204	218	265	0	84	0	579	341	481	172	0	794	283	232	254	0	0	293	0	0	1.43241	1.30091	0.742862	0.934406	0.86172	0.903021	1.04182	1.44079	0.906944	1.13981	0.831664	0.746343	0.715868	1.05552	0.929271	1.25998
1278	Smar_temp_005093:	14355	0	2164	4804	2516	4871	462	342	0	0	2069	612	770	866	0	336	0	1430	941	1146	427	0	1918	874	686	715	0	0	760	0	0	0.901699	1.19301	0.914493	0.947255	0.877239	1.02851	1.04767	1.12581	0.890201	1.20685	1.02998	0.833449	0.703018	1.10221	0.973719	1.25178
1279	Smar_temp_004947:	21964	0	4326	7163	3836	6639	683	968	0	0	2547	949	914	1328	0	956	0	2066	1271	1486	747	0	2895	1453	1288	1335	0	0	1077	0	0	1.28121	1.23928	0.730607	0.912948	0.95421	1.06154	1.01947	0.988705	0.928851	1.0299	1.12201	0.725752	0.686329	1.09616	1.02095	1.26921
1280	Smar_temp_005290:	4333	0	801	1373	793	1366	148	179	0	0	531	206	189	233	0	142	0	390	277	305	173	0	560	274	234	252	0	0	239	0	0	1.22106	1.28717	0.752154	0.921938	0.901015	0.927259	1.01977	1.18013	0.956011	1.07953	0.958985	0.815779	0.70464	1.10801	0.997944	1.23305
1281	Smar_temp_005431:	8272	0	1248	2957	1284	2783	229	286	0	0	1247	292	326	482	0	206	0	891	443	660	221	0	1352	463	388	433	0	0	352	0	0	1.47638	1.27904	0.710251	0.869714	0.89562	1.05013	1.14899	1.14084	0.814845	1.03783	1.09408	0.695449	0.663422	1.0255	1.03127	1.33184
1282	Smar_temp_001333:	180	0	30	70	41	39	10	0	0	0	10	7	20	14	0	6	0	11	11	8	6	0	30	17	8	10	0	0	11	0	0	0	1.10204	1.25436	0.685714	0.725275	0.878049	1.07079	0.878049	1.23827	1.45714	1.2	1.07692	0.527473	1.23827	1.53846	1.18343
1283	Smar_temp_010576:	5821	0	929	1850	1087	1955	262	120	0	0	785	251	279	341	0	156	0	598	426	434	164	0	673	402	299	310	0	0	320	0	0	0.691725	1.14464	0.807608	1.0127	0.962455	0.987076	1.29074	0.945358	0.876539	1.36156	1.05218	0.804468	0.698504	1.16689	0.993566	1.19557
1284	Smar_temp_003876:	27119	0	5234	8242	5095	8548	1003	876	0	0	3154	1562	1334	1564	0	974	0	2377	1881	1893	1073	0	2963	1822	1568	1619	0	0	1455	0	0	0.89084	1.18288	0.861495	0.98572	0.914968	1.01003	1.04782	1.09118	0.906	1.1454	0.964196	0.946796	0.728664	1.17126	0.981346	1.17059
1285	Smar_temp_005111:	962	0	150	321	170	321	38	24	0	0	127	43	47	56	0	21	0	104	61	69	29	0	133	62	36	64	0	0	47	0	0	0.905412	1.2417	0.82855	0.719252	0.970953	0.987209	1.26491	1.09404	0.82855	1.23871	0.897867	0.859107	0.64419	1.07535	1.27867	1.18568
1286	Smar_temp_008877:	49068	0	8251	17330	10187	13300	1926	1512	0	0	5100	1882	3690	4191	0	1560	0	3821	3059	2898	1574	0	6944	3297	2874	2243	0	0	2496	0	0	0.882668	1.13452	1.0256	0.986234	0.813439	1.16485	0.910672	0.918862	0.903951	1.13139	1.12437	0.841511	0.616945	1.10785	1.00293	1.4147
1287	Smar_temp_010934:	299	0	36	95	66	102	11	10	0	0	42	8	17	22	0	9	0	30	28	25	11	0	38	9	9	7	0	0	22	0	0	1.25842	1.25895	0.810686	0.786842	0.925697	1.04912	0.755051	1.38426	0.977124	0.786842	2.07639	0.651416	0.771414	1.24361	0.569989	1.20704
1288	Smar_temp_000586:	6157	0	951	1898	1119	2189	190	196	0	0	996	263	277	369	0	142	0	582	456	455	211	0	723	350	316	282	0	0	348	0	0	1.134	1.23571	0.803013	1.0779	0.862482	1.06972	0.934249	1.22079	0.874727	1.19388	0.966711	0.777855	0.674277	1.14619	0.83405	1.27978
1289	Smar_temp_003725:	7010	20	1219	2292	1115	2364	175	229	0	1	1036	351	282	356	19	203	0	659	428	555	265	0	945	436	406	345	0	1	317	0	0	1.18107	1.26102	0.773531	1.01865	0.852592	0.976514	0.986748	1.36674	0.843053	1.09392	0.95765	0.853835	0.71804	1.13825	0.83924	1.29952
1290	Smar_temp_004786:	3998	0	599	1341	766	1292	145	191	0	0	542	123	178	303	0	88	0	422	252	282	112	0	558	197	183	216	0	0	205	0	0	1.66426	1.24056	0.692796	0.910832	0.973787	1.17931	0.987992	0.9759	0.828143	0.980513	0.980555	0.635417	0.65073	1.01801	1.11585	1.29813
1291	Smar_temp_013187:	13295	0	2241	4403	2476	4175	457	454	0	0	1614	571	683	853	0	378	0	1282	882	1013	458	0	1699	837	739	666	0	0	708	0	0	1.08781	1.16516	0.832932	0.995731	0.927195	1.04025	0.991068	1.09739	0.910572	1.12778	1.00068	0.811383	0.732643	1.13436	0.946377	1.23106
1292	Smar_temp_003181:	5444	20	818	1866	894	1846	172	151	1	0	825	192	239	297	19	132	0	570	332	385	167	0	841	342	216	303	0	0	258	1	0	1.1241	1.31489	0.77995	0.770383	0.900844	0.969227	1.17158	1.24321	0.851077	1.21977	1.07395	0.692204	0.608465	1.09518	1.09239	1.31798
1293	Smar_temp_005750:	11598	0	1957	3763	2073	3805	407	405	0	0	1662	453	527	776	0	421	0	1166	734	852	366	0	1457	678	613	556	0	0	524	0	0	1.15784	1.19337	0.783538	0.965425	0.94448	1.15375	1.09845	1.04634	0.770478	1.06779	1.27492	0.705563	0.690135	1.07926	0.865989	1.33139
1294	Smar_temp_007023:	2251	0	511	651	492	597	97	168	0	0	195	107	113	154	0	95	0	180	114	125	126	0	230	141	127	163	0	0	115	0	0	1.50418	1.22163	0.79416	0.859364	1.04254	1.08231	0.902022	1.12813	0.881321	0.954097	0.81895	0.789522	0.723986	0.873657	1.20273	1.23158
1295	Smar_temp_008292:	5295	0	803	1995	931	1566	118	135	0	0	554	215	335	392	0	122	0	545	343	410	169	0	861	331	254	258	0	0	252	0	0	0.956169	1.14547	0.955033	0.83954	0.923693	1.11753	0.720856	1.19698	0.915219	1.09405	1.00183	0.90531	0.694889	1.24571	1.08637	1.19617
1296	Smar_temp_012576:	5176	0	809	1752	893	1722	151	145	0	0	714	215	271	327	0	132	0	536	326	438	159	0	670	317	275	243	0	0	256	0	0	1.03887	1.1298	0.896557	1.00426	0.919585	1.08182	0.980095	1.13918	0.861687	1.15763	1.04393	0.798824	0.751452	1.0973	0.902857	1.24631
1297	Smar_temp_007026:	14785	0	2377	4736	2675	4997	574	362	0	0	2010	670	688	738	0	363	0	1497	1050	1240	542	0	1776	982	775	697	0	0	820	0	0	0.841738	1.17069	0.802924	1.01785	0.935238	0.861276	1.186	1.26028	0.906989	1.28971	0.949882	0.833984	0.774679	1.16139	0.867592	1.19014
1298	Smar_temp_010916:	5336	0	815	1712	1013	1796	213	205	0	0	789	174	272	332	0	137	0	552	323	433	187	0	648	299	240	250	0	0	281	0	0	1.32496	1.17973	0.836896	0.917837	0.957954	1.02151	1.10758	1.20862	0.82415	1.14347	1.10058	0.634309	0.751439	0.947333	0.911364	1.30521
1299	Smar_temp_009183:	437	0	70	112	112	143	32	28	0	0	66	16	22	36	0	12	0	35	30	21	18	0	40	14	14	26	0	0	26	0	0	1.56071	1.39349	0.766422	0.780357	0.954983	1.25415	1.1148	1.00332	0.709416	0.780357	1.0702	0.698501	0.57299	0.818556	1.13506	1.41044
1300	Smar_temp_002737:	4318	20	727	1507	939	1125	237	170	0	1	341	149	223	366	19	160	0	444	309	275	146	0	618	248	221	200	0	0	189	0	1	1.0753	1.17502	0.680469	0.871018	1.13084	1.11682	1.16065	0.923497	0.77255	0.977432	1.30718	0.786651	0.700406	1.26306	1.05591	1.16341
1301	Smar_temp_006918:	2265	0	384	723	416	742	73	103	0	0	346	88	112	158	0	71	0	205	128	156	82	0	287	122	118	112	0	0	103	0	0	1.46043	1.24358	0.843441	0.962677	0.865525	1.18985	0.955442	1.16267	0.755802	0.99531	1.0906	0.699545	0.658644	0.939249	0.89033	1.42343
1302	Smar_temp_011289:	3582	0	705	1233	629	1015	118	104	0	0	359	178	206	205	0	164	0	309	200	281	137	0	488	259	229	175	0	0	169	0	0	0.840077	1.14979	0.951435	0.943645	0.884413	0.946816	1.06833	1.10664	0.94819	1.06727	1.18193	0.891026	0.804272	1.12212	0.876009	1.24821
1303	Smar_temp_011495:	35944	40	5187	11766	6484	12467	1186	979	0	0	5423	1493	1711	2192	38	773	0	3593	2607	2794	1147	0	4836	1942	1624	1643	1	0	1958	1	2	1.04628	1.25561	0.806129	0.956461	0.880426	1.03275	1.01397	1.22583	0.870631	1.14375	1.0327	0.829866	0.68464	1.15921	0.913242	1.25413
1304	Smar_temp_002113:	761	0	120	231	149	261	33	37	0	0	123	23	30	48	0	15	0	72	49	48	25	0	89	45	39	41	0	0	43	0	0	1.57478	1.26926	0.663296	1.07067	0.908792	1.06127	1.13117	1.06404	0.841446	1.23539	0.792708	0.558844	0.605862	0.958857	0.996201	1.37407
1305	Smar_temp_009435:	1266	0	239	316	263	448	42	80	0	0	189	57	39	67	0	36	0	105	102	86	57	0	96	66	75	71	0	0	97	0	0	1.61128	1.21711	0.594094	1.25722	0.938983	1.02062	0.768726	1.14803	1.04225	1.10635	0.797885	0.673958	0.769072	1.09597	0.839491	1.19217
1306	Smar_temp_005949:	6076	0	912	1894	1198	2072	238	294	0	0	919	227	291	416	0	131	0	586	375	462	204	0	756	260	260	316	0	0	340	0	0	1.63498	1.2805	0.779245	0.914569	0.907289	1.11397	1.00758	1.13448	0.832243	0.914569	0.956972	0.729893	0.715303	0.917915	1.01606	1.30063
1307	Smar_temp_002888:	1950	0	328	636	371	615	78	86	0	0	248	70	86	142	0	55	0	203	121	126	57	0	250	117	96	120	0	0	94	0	0	1.37811	1.2052	0.710726	0.897377	1.01204	1.17352	1.10505	0.913401	0.803366	1.09368	0.996895	0.676681	0.628164	1.03412	1.16002	1.2786
1308	Smar_temp_007156:	544	0	82	171	97	194	14	22	0	0	84	21	28	35	0	12	0	57	33	43	17	0	66	27	19	34	0	0	31	0	0	1.50465	1.22786	0.91831	0.737127	0.934708	1.14789	0.809438	1.16269	0.896163	1.0475	0.970851	0.718129	0.705131	0.95398	1.16269	1.21416
1309	Smar_temp_001536:	228	0	32	101	40	55	9	2	0	0	18	6	21	20	0	6	0	25	8	19	5	0	43	18	11	10	0	0	6	0	0	0.35625	0.961082	1.18515	0.77599	1.0261	1.12871	1.2825	0.890625	0.621818	1.2698	1.33594	0.777273	0.779838	0.829091	1.29545	1.35669
1310	Smar_temp_001692:	1019	0	212	355	181	271	30	50	0	0	89	52	49	60	0	39	0	86	52	71	46	0	153	71	67	59	0	0	44	0	0	1.32779	1.23711	0.777076	0.907162	0.910909	0.951521	0.933122	1.22157	0.914069	0.961321	0.884234	0.9223	0.75203	1.08026	1.04646	1.23488
1311	Smar_temp_005589:	1043	0	144	309	213	377	56	26	0	0	161	38	40	65	0	24	0	111	91	80	25	0	107	56	50	45	0	0	67	0	0	0.884129	1.16883	0.633879	1.17202	0.993819	1.03005	1.2874	0.850124	0.870238	1.31266	1.20718	0.730069	0.716266	1.18197	0.864556	1.18148
1312	Smar_temp_012971:	6470	0	1341	1836	1420	1873	275	491	0	0	736	245	248	460	0	246	0	560	406	346	353	0	670	359	357	385	0	0	332	0	0	1.66828	1.28598	0.615453	0.938147	1.05361	1.14157	0.882389	1.19939	0.807637	0.943403	0.885079	0.631108	0.650983	0.987653	0.991741	1.3574
1313	Smar_temp_007276:	8453	20	1319	2728	1525	2861	331	380	0	1	1367	226	323	481	19	258	0	849	491	588	295	0	1203	455	351	415	0	0	418	0	1	1.59691	1.36643	0.656295	0.824572	0.91951	0.977331	1.20309	1.2397	0.80984	1.06889	1.25355	0.50624	0.636834	0.951272	0.9296	1.4117
1314	Smar_temp_006618:	2535	0	524	801	651	559	233	72	0	0	163	107	170	189	0	122	0	137	176	103	77	0	285	223	208	117	0	0	152	0	0	0.535055	1.12605	0.826444	1.25625	0.775629	0.918811	1.39371	0.572211	1.05884	1.34685	1.12635	0.926016	0.583137	1.22602	1.01256	1.32234
1315	Smar_temp_003100:	9156	0	1489	2720	1710	3237	337	297	0	0	1402	441	429	534	0	268	0	856	647	702	301	0	1001	483	434	485	0	0	538	0	0	1.068	1.2388	0.844497	0.981142	0.89016	1.05119	1.05522	1.08238	0.889916	1.09192	1.10675	0.837736	0.730014	1.07022	0.921319	1.22509
1316	Smar_temp_003124:	3627	0	639	1163	639	1186	106	132	0	0	467	165	163	225	0	115	0	385	238	285	139	0	426	226	189	196	0	0	169	0	0	1.17252	1.14235	0.795526	0.92242	1.01238	1.09812	0.941568	1.2347	0.808814	1.103	1.02151	0.789671	0.749425	1.13904	0.938033	1.20419
1317	Smar_temp_006874:	1014	0	171	334	194	315	40	20	0	0	116	55	46	60	0	32	0	93	88	69	43	0	141	64	53	42	0	0	51	0	0	0.611322	1.28163	0.719859	0.94096	0.896322	0.938947	1.07769	1.31434	0.846244	1.13625	1.10967	1.03537	0.665013	1.46019	0.790643	1.18543
1318	Smar_temp_011858:	1515	0	228	535	265	487	43	46	0	0	179	56	71	108	0	38	0	180	105	127	42	0	211	88	72	76	0	0	72	0	0	1.15343	1.11683	0.758702	0.894245	1.04665	1.15408	0.927661	1.05313	0.845221	1.09297	1.10746	0.764077	0.738471	1.23261	1.03696	1.14343
1319	Smar_temp_000967:	618	0	123	181	111	203	18	22	0	0	65	51	37	33	0	17	0	57	34	51	29	0	63	33	24	53	0	0	30	0	0	0.995825	1.18843	1.13812	0.666217	0.958713	1.01508	0.902849	1.31268	0.822793	0.916049	0.694428	1.26229	0.857796	0.932499	1.31179	0.974787
1320	Smar_temp_005427:	3871	0	584	1245	651	1391	110	114	0	0	594	171	170	224	0	84	0	427	257	343	118	0	462	215	185	197	0	0	199	0	0	1.16074	1.15379	0.811936	0.984947	0.954453	1.06984	1.00474	1.20147	0.850684	1.14467	0.953404	0.814853	0.766692	1.09862	0.938749	1.18838
1321	Smar_temp_000606:	1383	0	262	415	292	414	59	54	0	0	136	67	62	84	0	45	0	120	117	83	59	0	152	96	80	78	0	0	90	0	0	0.976184	1.22059	0.707592	1.01757	0.965951	0.958673	0.956992	1.06657	1.02963	1.22108	0.906634	0.85427	0.668116	1.33852	0.994524	1.09739
1322	Smar_temp_001349:	8772	0	1703	2824	1574	2671	312	268	0	0	911	446	421	472	0	347	0	843	573	664	320	0	1046	642	513	523	0	0	470	0	0	0.877029	1.15054	0.830828	0.9357	0.980365	0.931475	1.1047	1.0472	0.980659	1.17099	1.04954	0.860092	0.772197	1.19557	1.00858	1.12013
1323	Smar_temp_009457:	4254	20	687	1362	714	1471	142	110	0	0	686	143	192	215	19	167	1	428	270	303	143	0	575	267	167	210	0	0	214	1	0	0.953971	1.31859	0.839892	0.759242	0.908765	0.940504	1.18492	1.24016	0.866763	1.21388	1.50522	0.601955	0.643354	1.09358	0.88399	1.34864
1324	Smar_temp_007185:	2549	0	499	685	533	832	112	101	0	0	320	127	135	125	0	94	0	202	185	181	113	0	201	177	146	146	0	0	183	0	0	0.967973	1.0919	0.94251	1.08876	0.903457	0.872694	1.00492	1.08298	1.05189	1.31993	0.962269	0.77974	0.809533	1.06339	0.896394	1.17835
1325	Smar_temp_000114:	312	0	66	78	94	74	26	27	0	0	20	14	18	26	0	14	0	14	23	15	16	0	25	11	20	16	0	0	26	0	0	1.35783	1.28205	0.765957	1.21212	0.756757	1.10638	0.918062	0.804642	1.16619	0.666667	1.00275	0.894349	0.810811	1.03163	1.02211	1.13952
1326	Smar_temp_006786:	800	0	152	184	169	295	28	57	0	0	144	34	42	46	0	20	0	69	42	57	47	0	39	41	33	52	0	0	48	0	0	1.77515	0.92155	1.08052	0.943936	1.01695	1.18343	0.784286	1.46372	0.770234	1.17277	0.692521	0.606601	0.840088	0.673954	0.927743	1.32376
1327	Smar_temp_002262:	8212	0	1518	2489	1493	2712	284	301	0	0	1125	412	354	419	0	258	0	756	554	571	371	0	951	547	427	462	0	0	419	0	0	1.09065	1.26061	0.782289	0.928069	0.919721	0.92593	1.04628	1.34428	0.849794	1.18888	0.919444	0.821835	0.694657	1.12359	0.921572	1.25609
1328	Smar_temp_003466:	1077	0	153	371	251	302	58	28	0	0	102	53	86	99	0	32	0	92	79	68	38	0	163	40	30	53	0	0	55	0	0	0.785251	1.27543	0.994641	0.569209	0.884347	1.14499	0.991508	1.0657	0.781444	0.758945	1.47225	1.23536	0.653648	1.12244	1.23536	1.20449
1329	Smar_temp_005534:	4681	0	757	1486	876	1562	171	141	0	0	630	204	250	276	0	123	0	447	313	369	147	0	552	289	237	250	0	0	281	0	0	0.995309	1.17015	0.898992	0.986217	0.90146	0.992487	1.0431	1.03766	0.961302	1.2026	1.00474	0.807592	0.744158	1.07077	0.989696	1.2087
1330	Smar_temp_010553:	6742	0	1096	2279	1152	2215	203	141	0	0	892	305	327	383	0	189	0	662	481	502	211	0	933	461	356	340	0	0	355	0	0	0.752913	1.2111	0.83973	0.960913	0.884156	0.983537	1.03129	1.1267	0.937974	1.24433	1.06079	0.847041	0.670462	1.27089	0.944242	1.22576
1331	Smar_temp_002033:	399	0	74	136	88	101	25	20	0	0	37	15	27	28	0	6	0	32	16	27	18	0	47	33	29	21	0	0	17	0	0	1.22543	1.01389	0.90015	1.14974	0.929528	0.933489	1.28809	1.10289	0.763164	1.30833	0.43718	0.800776	0.784289	0.718272	1.12109	1.44721
1332	Smar_temp_005079:	1359	0	283	423	231	422	38	62	0	0	170	61	54	84	0	49	0	129	77	76	47	0	151	111	88	99	0	0	62	0	0	1.28888	1.14687	0.751036	0.999023	0.982101	1.16828	0.967785	0.977055	0.864344	1.26013	0.831462	0.694145	0.578602	1.07346	1.12656	1.29731
1333	Smar_temp_011360:	15412	0	2398	5051	2620	5343	504	404	0	0	2221	701	677	732	0	364	0	1546	1034	1350	509	0	2041	928	787	738	0	0	875	0	0	0.991037	1.23296	0.788441	1.0014	0.882889	0.852494	1.13158	1.24861	0.963342	1.18081	0.975578	0.843223	0.770957	1.1384	0.88773	1.19905
1334	Smar_temp_010131:	8242	0	1125	2705	1423	2989	264	249	0	0	1422	288	353	475	0	170	0	853	557	663	257	0	1148	418	351	347	0	0	426	0	0	1.28196	1.29312	0.755849	0.950648	0.869538	1.01708	1.07455	1.32315	0.825489	1.13211	1.10707	0.705906	0.675854	1.07934	0.850518	1.31184
1335	Smar_temp_002936:	9193	0	1627	2836	1736	2994	379	473	0	0	1365	342	377	569	0	264	0	853	507	640	354	0	1080	547	526	482	0	0	434	0	0	1.53951	1.23444	0.703951	1.04797	0.923524	1.06246	1.1561	1.15219	0.767619	1.08981	0.916824	0.645422	0.692914	0.896734	0.90963	1.39987
1336	Smar_temp_012852:	2893	20	462	1061	469	881	82	103	0	1	396	84	117	173	19	111	1	277	166	208	91	0	517	163	150	110	0	0	123	0	0	1.37522	1.32864	0.680215	0.885283	0.857308	1.00579	1.07849	1.215	0.861202	0.962008	1.50448	0.597049	0.643755	1.16227	0.78185	1.47602
1337	Smar_temp_006737:	2431	0	322	662	566	881	164	49	0	0	407	96	133	154	0	73	0	200	220	158	70	0	245	104	83	96	0	0	178	0	0	0.653595	1.35905	0.862903	0.946562	0.833645	0.999151	1.2445	0.933707	0.867786	1.18605	1.71158	0.822668	0.658579	1.07254	0.822668	1.27476
1338	Smar_temp_000006:	1245	0	291	378	287	289	70	79	0	0	67	53	57	88	0	72	0	102	81	65	62	0	137	87	81	76	0	0	67	0	0	1.17766	1.19373	0.65414	0.916789	1.16246	1.0099	1.05804	0.924243	1.00569	0.9847	1.05856	0.784611	0.740787	1.21583	1.1251	0.998731
1339	Smar_temp_009222:	1444	0	261	514	272	397	45	76	0	0	157	57	74	122	0	41	0	125	76	90	47	0	215	87	99	74	0	0	58	0	0	1.54586	1.17511	0.764305	1.06561	0.884552	1.26007	0.878298	0.955995	0.775596	0.936446	0.869101	0.794348	0.636878	1.0163	1.03126	1.43842
1340	Smar_temp_009811:	10834	0	1655	3656	1761	3762	298	264	0	0	1521	483	526	593	0	240	0	1211	673	1025	323	0	1370	667	549	543	0	0	547	0	0	0.981376	1.11044	0.885134	0.983008	0.953911	0.997879	1.04109	1.2007	0.894536	1.19429	0.949301	0.840464	0.807398	1.10059	0.94487	1.16434
1341	Smar_temp_010062:	413	0	61	158	73	121	14	9	0	0	44	19	24	38	0	13	0	45	26	40	8	0	59	20	29	11	0	0	13	0	0	0.834718	0.976086	0.859372	1.24269	0.972121	1.36067	1.08501	0.741972	0.607834	0.857024	1.44289	1.06314	0.864107	1.21567	0.615499	1.24117
1342	Smar_temp_011961:	1214	0	159	403	207	445	33	0	0	0	173	63	55	71	0	20	0	137	119	102	32	0	154	76	56	51	0	0	71	0	0	0	1.15114	0.800398	1.06097	0.927415	1.03324	0.934958	1.18032	0.935722	1.43989	0.960405	1.08094	0.690484	1.56832	0.875048	1.06058
1343	Smar_temp_002896:	900	0	157	253	198	292	60	42	0	0	134	37	43	53	0	38	0	71	53	48	34	0	111	40	28	57	0	0	50	0	0	1.21598	1.56072	0.772548	0.634425	0.864963	0.95221	1.37741	0.984366	0.778331	0.906322	1.38748	0.726376	0.584764	0.825031	1.11901	1.41443
1344	Smar_temp_004940:	2690	0	469	863	616	742	139	73	0	0	252	113	194	206	0	100	0	207	210	154	101	0	319	183	142	126	0	0	170	0	0	0.679707	1.15218	0.981663	0.94375	0.869577	1.04238	0.985384	0.940416	1.0005	1.21624	1.22294	0.873482	0.646932	1.23591	0.973971	1.23125
1345	Smar_temp_011914:	2424	0	397	984	467	576	87	92	0	0	184	75	144	215	0	89	0	208	144	151	55	0	476	141	156	97	0	0	109	0	0	1.20285	1.19165	0.759597	0.967992	0.889566	1.13412	0.966981	0.719098	0.982245	0.874916	1.36881	0.795025	0.645791	1.29764	1.02823	1.34433
1346	Smar_temp_007667:	8723	0	1543	2836	1518	2826	264	211	0	0	1102	429	447	495	0	283	0	828	596	647	292	0	1074	620	487	480	0	0	467	0	0	0.785797	1.16482	0.905723	0.970784	0.901193	1.00298	0.99937	1.08745	0.949596	1.23591	1.03686	0.858193	0.704193	1.2119	0.960216	1.20366
1347	Smar_temp_008629:	18266	0	2863	6097	3148	6158	560	477	0	0	2551	786	926	998	0	513	0	1825	1185	1542	594	0	2469	1087	876	880	0	0	996	0	0	0.966731	1.2132	0.881259	0.916664	0.887872	0.94978	1.0322	1.20385	0.938487	1.13746	1.14319	0.814338	0.750191	1.11657	0.911728	1.22878
1348	Smar_temp_011502:	6697	0	1067	2435	942	2253	137	145	0	0	932	266	288	322	0	191	0	748	372	595	176	0	1053	464	346	354	0	0	307	0	0	0.966124	1.18935	0.840858	0.891852	0.913107	0.940127	1.03395	1.17267	0.968739	1.19601	1.12353	0.741031	0.726335	1.17385	0.986184	1.22963
1349	Smar_temp_000109:	6776	0	1224	2114	1305	2133	231	335	0	0	881	282	321	412	0	204	0	579	417	468	271	0	831	403	382	367	0	0	391	0	0	1.42111	1.25998	0.78843	1.00035	0.870074	1.01194	0.919103	1.14961	0.951807	1.05534	0.922658	0.731897	0.703272	1.0151	0.952505	1.3121
1350	Smar_temp_002214:	7369	0	1397	2284	1364	2324	293	346	0	0	1034	239	322	405	0	320	0	663	403	545	278	0	841	492	457	342	0	0	388	0	0	1.33805	1.18799	0.761647	1.05544	0.920428	0.957973	1.16051	1.07508	0.901965	1.13627	1.20827	0.542468	0.756611	0.936835	0.776251	1.41077
1351	Smar_temp_011581:	3369	0	529	1055	632	1153	114	113	0	0	486	145	182	216	0	90	0	327	222	257	107	0	401	181	145	187	0	0	195	0	0	1.13869	1.21378	0.919608	0.875308	0.905664	1.0914	0.96155	1.07823	0.901549	1.09263	1.08351	0.800911	0.711791	1.02638	1.0329	1.23163
1352	Smar_temp_003779:	276	0	83	79	51	63	9	15	0	0	15	20	13	17	0	20	0	20	14	10	17	0	23	28	22	24	0	0	8	0	0	0.97803	1.01714	0.890544	0.926033	1.1091	1.16456	0.955017	1.10843	0.687208	1.17859	0.801277	1.05565	0.554551	1.20261	1.26678	1.04308
1353	Smar_temp_009479:	10670	0	1749	3425	2013	3483	424	377	0	0	1425	435	528	681	0	323	0	1068	684	831	353	0	1298	614	531	542	0	0	555	0	0	1.14254	1.18064	0.817135	0.94582	0.95526	1.05392	1.11646	1.06981	0.844618	1.09366	1.12665	0.761922	0.743278	1.04093	0.949337	1.25335
1354	Smar_temp_012885:	2414	0	290	882	392	850	80	32	0	0	391	70	112	131	0	45	0	272	168	204	64	0	403	143	94	87	0	0	117	0	0	0.679521	1.25056	0.781989	0.887153	0.875828	0.914648	1.25677	1.35904	0.847653	1.34961	1.29168	0.685517	0.656871	1.21714	0.852	1.3064
1355	Smar_temp_008429:	27488	0	4597	8808	4975	9108	931	829	0	0	3681	1287	1390	1552	0	840	0	2605	1825	2162	957	0	3453	1641	1360	1439	0	0	1535	0	0	0.996392	1.22345	0.871942	0.923273	0.892587	0.973564	1.03397	1.15024	0.931184	1.11404	1.09263	0.844937	0.740796	1.10711	0.944727	1.21973
1356	Smar_temp_011123:	7142	0	1192	2347	1123	2480	192	162	0	0	980	355	300	331	0	198	0	768	469	648	223	0	890	477	389	382	0	0	377	0	0	0.864329	1.15394	0.812921	0.993071	0.942359	0.896923	1.08733	1.18979	0.966785	1.21772	0.995251	0.85767	0.795115	1.20271	0.922901	1.138
1357	Smar_temp_004271:	7446	0	1154	2615	1226	2451	238	180	0	0	914	317	352	395	0	187	0	803	456	678	176	0	1072	469	388	403	0	0	417	0	0	0.947326	1.16728	0.81753	0.957364	0.932875	0.917398	1.17901	0.926274	1.0333	1.15723	1.04557	0.834513	0.787658	1.12994	1.06091	1.13288
1358	Smar_temp_005299:	2175	0	384	740	323	728	44	48	0	0	263	130	104	89	0	57	0	224	126	228	79	0	274	149	137	111	0	0	111	0	0	0.841718	1.08829	0.946364	1.04862	0.904366	0.809869	0.91729	1.38533	1.02671	1.14047	0.840759	1.01144	0.920515	1.16546	0.863614	1.07933
1359	Smar_temp_005398:	20157	0	3526	6428	3319	6884	579	700	0	0	3108	901	785	1134	0	649	0	1929	1255	1385	661	0	2633	1276	1081	1135	0	0	945	0	0	1.20569	1.28447	0.741673	0.961376	0.878702	1.07141	1.05947	1.13851	0.8337	1.1348	1.05222	0.748217	0.630898	1.10719	0.942537	1.32198
1360	Smar_temp_005137:	1225	0	349	338	253	285	43	90	0	0	93	71	53	77	0	79	0	67	67	39	79	0	113	109	105	86	0	0	53	0	0	1.24863	1.21166	0.759232	1.09039	0.852019	1.10304	0.822931	1.09602	0.900423	1.13193	0.794534	0.874428	0.495951	1.13827	1.05917	1.40259
1361	Smar_temp_005549:	624	0	87	160	196	181	66	19	0	0	47	25	47	40	0	4	0	39	64	38	20	0	42	39	31	32	0	0	70	0	0	0.695285	1.02375	0.935204	1.38966	0.840331	0.795918	1.07205	0.731879	1.23125	1.74828	0.329766	0.990665	0.818785	1.12572	1.26805	0.895211
1362	Smar_temp_008846:	1483	0	227	493	295	468	64	48	0	0	194	51	64	109	0	47	0	153	118	107	52	0	196	81	79	49	0	0	70	0	0	1.063	1.19592	0.652608	1.04688	0.983422	1.11147	1.09063	1.15159	0.751919	1.07338	1.35266	0.711934	0.687752	1.26752	0.684015	1.31356
1363	Smar_temp_007540:	8277	0	1398	2766	1470	2643	291	368	0	0	1143	294	330	497	0	272	0	796	481	577	272	0	1228	463	412	442	0	0	410	0	0	1.48216	1.32852	0.671765	0.881883	0.901232	1.01172	1.11463	1.09551	0.873459	0.991048	1.15193	0.658591	0.65328	1.02472	0.990127	1.35433
1364	Smar_temp_002707:	2048	0	317	550	371	810	66	46	0	0	336	121	75	100	0	46	0	202	184	149	54	0	196	104	76	141	0	0	151	0	0	0.801041	1.32697	0.752757	0.892733	0.928611	1.00368	0.982033	0.940352	1.02908	1.22163	0.937496	0.965097	0.684965	1.25397	1.12462	1.04882
1365	Smar_temp_007012:	4147	0	672	1360	712	1403	135	112	0	0	632	161	213	232	0	133	0	389	252	305	124	0	556	266	201	214	0	0	221	0	0	0.97074	1.24661	0.91221	0.912057	0.845448	0.993581	1.10435	1.07475	0.917463	1.207	1.22137	0.708163	0.662884	1.04616	0.941284	1.33148
1366	Smar_temp_003063:	5845	0	874	2024	1095	1852	221	174	0	0	763	237	351	395	0	150	0	588	349	502	215	0	813	313	271	238	0	0	264	0	0	1.06269	1.15999	0.925693	0.89543	0.916875	1.04173	1.07733	1.3131	0.76091	1.03421	1.14776	0.855816	0.782775	1.0059	0.859427	1.30025
1367	Smar_temp_012843:	2887	0	476	843	521	1047	96	62	0	0	413	153	125	145	0	86	0	300	238	247	99	0	275	175	142	149	0	0	181	0	0	0.721762	1.11718	0.821659	1.02165	0.981282	0.953124	1.02104	1.15249	0.957946	1.25907	1.0958	0.886308	0.807922	1.25962	0.863136	1.08769
1368	Smar_temp_010319:	3544	0	539	1186	639	1180	121	121	0	0	494	131	174	207	0	90	0	369	223	316	125	0	465	197	177	147	0	0	186	0	0	1.24506	1.17159	0.813687	0.981281	0.934444	0.968007	1.05021	1.28622	0.874226	1.09216	1.09789	0.729952	0.800229	1.04813	0.819106	1.25735
1369	Smar_temp_004864:	5119	0	753	1551	1003	1812	228	240	0	0	849	142	209	276	0	111	0	506	326	386	184	0	628	260	208	250	0	0	315	0	0	1.62667	1.33635	0.687731	0.911678	0.921649	0.9082	1.16016	1.24712	0.887231	1.1396	1.00212	0.532746	0.703076	0.918213	0.937933	1.32366
1370	Smar_temp_009895:	2823	0	551	911	500	861	81	101	0	0	338	145	142	186	0	111	0	246	176	182	101	0	348	194	174	165	0	0	132	0	0	1.03493	1.18373	0.880057	0.978566	0.885369	1.15275	0.914652	1.03493	0.865589	1.09104	1.03212	0.862828	0.655029	1.15412	0.981839	1.28713
1371	Smar_temp_002294:	1786	0	355	563	385	483	76	59	0	0	142	88	133	122	0	76	0	143	117	118	77	0	190	132	96	106	0	0	110	0	0	0.770982	1.07058	1.09588	0.857859	0.939208	1.00525	0.915743	1.0062	1.05649	1.17956	1.07706	0.916619	0.775011	1.12372	1.10411	1.08712
1372	Smar_temp_008463:	1824	0	284	559	338	643	70	53	0	0	258	85	83	97	0	48	0	193	132	149	64	0	215	98	67	104	0	0	107	0	0	1.00708	1.25499	0.801262	0.769785	0.979398	0.936414	1.11761	1.2161	0.89801	1.12595	1.0855	0.849013	0.756116	1.10782	1.03879	1.13821
1373	Smar_temp_010302:	6935	0	1198	2484	1314	1939	297	128	0	0	663	313	456	471	0	226	0	644	433	546	227	0	935	531	448	297	0	0	319	0	0	0.563903	1.05088	0.968867	1.04404	0.927263	1.00074	1.19292	1.00005	0.868288	1.23746	1.09205	0.93445	0.786158	1.17859	0.886683	1.22294
1374	Smar_temp_008190:	2990	0	532	923	593	942	88	167	0	0	383	117	120	204	0	72	0	275	218	188	134	0	354	176	173	153	0	0	167	0	0	1.58278	1.24243	0.655535	1.05343	0.945695	1.11441	0.748246	1.27002	0.893886	1.07169	0.760642	0.698063	0.646512	1.16687	0.912851	1.29053
1375	Smar_temp_002789:	8539	34	1322	2874	1401	2908	257	318	0	0	1379	296	362	502	32	217	1	843	464	634	252	0	1245	491	422	430	0	0	390	2	1	1.4661	1.28707	0.767698	0.948421	0.861298	1.0646	1.11806	1.16182	0.817408	1.10349	1.06024	0.657465	0.647761	0.972506	0.955102	1.39246
1376	Smar_temp_011379:	4887	0	714	1806	793	1574	128	147	0	0	678	174	207	278	0	92	0	486	311	367	151	0	860	301	253	217	0	0	236	0	0	1.26879	1.28856	0.706353	0.958842	0.835519	0.948629	0.994732	1.30331	0.924009	1.14076	0.881929	0.756639	0.630937	1.21766	0.943624	1.3374
1377	Smar_temp_001839:	2092	0	358	629	378	727	66	106	0	0	329	85	75	123	0	54	0	214	130	144	90	0	250	112	90	124	0	0	99	0	0	1.63867	1.32191	0.659904	0.836124	0.979017	1.08224	0.966322	1.39133	0.753652	1.04051	0.881433	0.683224	0.658778	0.989644	0.996703	1.30223
1378	Smar_temp_007100:	1213	0	187	418	234	374	27	28	0	0	147	51	71	74	0	26	0	105	108	87	62	0	175	82	66	32	0	0	71	0	0	0.776178	1.21492	0.880495	1.0242	0.814708	0.917699	0.598126	1.71868	0.984083	1.2725	0.901885	0.884541	0.675044	1.49691	0.555006	1.27478
1379	Smar_temp_000757:	8780	0	1382	2980	1599	2819	320	259	0	0	1125	352	494	520	0	237	0	883	526	705	300	0	1221	534	382	462	0	0	459	0	0	1.02905	1.2072	0.910242	0.814392	0.922877	0.958149	1.09887	1.19195	0.894054	1.13844	1.0895	0.793294	0.736838	1.02456	1.0412	1.24296
1380	Smar_temp_007976:	2600	0	644	635	657	664	174	149	0	0	213	188	159	166	0	138	0	128	175	99	182	0	200	169	147	177	0	0	135	0	0	0.915605	1.2896	0.990904	0.934611	0.789299	1.03453	1.04807	1.11839	0.804588	1.07449	0.865129	1.14308	0.610473	1.04298	1.0762	1.25608
1381	Smar_temp_009278:	7545	0	1229	2399	1330	2587	277	275	0	0	1125	302	359	419	0	214	0	773	419	612	247	0	929	438	338	430	0	0	387	0	0	1.26937	1.21791	0.84893	0.864956	0.939749	0.990812	1.18151	1.14013	0.848637	1.12086	1.06898	0.716668	0.744019	0.918809	1.02042	1.26829
1382	Smar_temp_012515:	11779	0	1957	3949	2170	3703	437	429	0	0	1439	473	556	769	0	362	0	1215	747	902	388	0	1585	693	593	614	0	0	576	0	0	1.18991	1.19719	0.764252	0.903827	0.978687	1.05703	1.09313	1.07619	0.84434	1.05624	1.11336	0.768821	0.726564	1.095	0.998004	1.23612
1383	Smar_temp_011877:	10711	0	1796	3690	1774	3451	308	277	0	0	1295	516	504	590	0	288	0	1102	685	911	338	0	1473	715	610	560	0	0	538	0	0	0.931215	1.15872	0.824671	0.985887	0.926916	0.965388	1.04827	1.13628	0.941269	1.15559	0.956335	0.89172	0.766262	1.19846	0.967758	1.16469
1384	Smar_temp_000661:	4048	0	728	1431	701	1188	118	145	0	0	442	168	196	273	0	131	0	400	242	281	132	0	592	284	242	223	0	0	178	0	0	1.15016	1.17026	0.790932	0.94034	0.952455	1.10165	0.972045	1.04704	0.865219	1.10354	1.00057	0.786325	0.6691	1.17631	1.04375	1.26774
1385	Smar_temp_012692:	1841	0	310	631	336	564	60	89	0	0	220	74	97	113	0	51	0	176	90	147	69	0	274	96	83	107	0	0	94	0	0	1.57305	1.26691	0.842281	0.781161	0.910454	0.981214	0.978423	1.21956	0.913194	0.903512	0.977014	0.779192	0.760436	0.874335	1.12667	1.27326
1386	Smar_temp_000324:	7489	20	1226	2476	1585	2182	313	254	0	1	833	336	535	594	19	252	1	593	483	496	259	0	1001	384	346	369	0	0	419	0	0	0.978899	1.2228	1.02093	0.853609	0.822002	1.13352	0.93306	0.998168	0.907306	0.947358	1.25558	0.940628	0.687543	1.04589	1.03301	1.31027
1387	Smar_temp_001503:	17844	20	2428	5801	2968	6627	622	328	0	1	3140	732	789	916	19	384	1	1858	1229	1502	534	0	2398	984	755	755	0	0	896	0	0	0.812182	1.27156	0.817716	0.956506	0.862419	0.949338	1.25995	1.32227	0.812867	1.24662	1.16232	0.811779	0.697176	1.11497	0.837285	1.27582
1388	Smar_temp_008166:	1037	0	142	340	187	368	51	20	0	0	176	44	51	56	0	25	0	100	64	81	32	0	150	53	38	47	0	0	48	0	0	0.78105	1.34559	0.831818	0.816197	0.828804	0.913369	1.5124	1.24968	0.72332	1.13838	1.28571	0.873163	0.671332	0.964427	0.932697	1.34771
1389	Smar_temp_000505:	1943	0	374	615	451	503	90	64	0	0	163	71	146	134	0	89	0	140	151	105	98	0	225	150	103	84	0	0	129	0	0	0.737233	1.15586	1.02276	0.870088	0.879342	0.938698	0.85973	1.12889	1.10489	1.26712	1.23629	0.733317	0.659506	1.29332	0.867586	1.25177
1390	Smar_temp_013106:	10942	0	1823	3633	1884	3602	341	324	0	0	1486	498	518	616	0	329	0	1073	700	804	382	0	1541	672	500	612	0	0	545	0	0	1.03222	1.27752	0.828095	0.826066	0.897196	0.984762	1.05121	1.21701	0.878757	1.11023	1.08323	0.829843	0.67227	1.12868	1.01981	1.25322
1391	Smar_temp_002035:	4229	0	989	1112	883	1245	184	143	0	0	392	263	179	210	0	323	0	306	377	243	206	0	399	260	227	233	0	0	283	0	0	0.692495	1.36459	0.770948	0.872896	0.934727	0.904464	0.998008	0.99758	1.08866	0.999793	1.39652	0.903291	0.742284	1.45027	0.800254	1.06951
1392	Smar_temp_004005:	12226	0	1746	3678	2517	4285	518	372	0	0	1762	547	646	785	0	277	0	1200	981	964	438	0	1379	550	452	578	0	0	776	0	0	1.0349	1.24631	0.853143	0.860532	0.9309	1.03671	0.999649	1.21852	0.879654	1.04711	1.1109	0.893875	0.747823	1.11204	0.944533	1.17324
1393	Smar_temp_008488:	2411	0	510	722	503	676	114	118	0	0	233	120	120	155	0	102	0	186	151	119	98	0	278	170	137	173	0	0	136	0	0	1.10902	1.28578	0.79666	0.897037	0.918811	1.02902	1.08634	0.921054	0.964321	1.11311	0.94549	0.839192	0.587842	1.07068	1.20984	1.22931
1394	Smar_temp_009913:	542	0	73	182	91	196	14	16	0	0	86	30	25	37	0	9	0	57	36	47	17	0	79	18	20	27	0	0	23	0	0	1.30543	1.29266	0.818138	0.815896	0.866057	1.21084	0.916314	1.38702	0.698924	0.734307	0.915369	1.13643	0.714118	1.09397	1.02278	1.21335
1395	Smar_temp_008122:	1066	0	207	303	214	342	39	49	0	0	144	53	51	74	0	39	0	85	74	82	41	0	81	66	86	41	0	0	60	0	0	1.17915	0.940496	0.838438	1.46165	0.874394	1.21656	0.907809	0.986636	0.873914	1.12173	0.970244	0.798062	0.843533	1.07783	0.617369	1.3124
1396	Smar_temp_011648:	10588	0	2097	3102	2213	3176	480	605	0	0	1287	463	517	659	0	422	0	851	611	636	499	0	1199	607	534	642	0	0	575	0	0	1.38035	1.31932	0.797409	0.86919	0.914579	1.01643	1.03775	1.1385	0.866203	0.988012	1.01608	0.736065	0.683516	0.920435	1.02063	1.35093
1397	Smar_temp_010016:	1227	0	212	397	252	366	49	61	0	0	176	34	73	97	0	46	0	100	69	72	50	0	156	71	67	49	0	0	56	0	0	1.401	1.21447	0.895316	0.976772	0.844448	1.18967	0.946759	1.14836	0.744991	1.03509	1.25583	0.537659	0.608003	0.917935	0.774861	1.61211
1398	Smar_temp_005333:	538	0	119	145	121	153	32	18	0	0	58	36	38	37	0	25	0	35	33	23	27	0	44	40	28	39	0	0	24	0	0	0.672547	1.1259	1.16523	0.873022	0.848772	1.13457	1.17588	1.00882	0.697456	1.24717	0.949792	1.06377	0.557764	0.959002	1.15241	1.33299
1399	Smar_temp_004920:	1144	0	221	294	267	362	49	38	0	0	140	64	76	65	0	43	0	84	104	58	79	0	94	76	39	60	0	0	74	0	0	0.736726	1.24411	1.1076	0.686675	0.90292	0.947285	0.78632	1.53161	0.875866	1.33814	1.00719	0.915177	0.623445	1.23095	0.857979	1.22218
1400	Smar_temp_003277:	10964	0	2036	3830	1704	3394	292	275	0	0	1251	523	525	557	0	391	0	1100	611	922	335	0	1504	847	700	610	0	0	520	0	0	0.869069	1.12414	0.881982	0.984216	0.927793	0.935741	1.10259	1.05868	0.985805	1.1909	1.03417	0.829815	0.777659	1.15832	0.967853	1.1907
1401	Smar_temp_006255:	2406	0	453	792	421	740	82	111	0	0	294	76	108	130	0	109	0	240	120	184	79	0	320	157	123	142	0	0	130	0	0	1.40036	1.22743	0.779313	0.824855	0.985258	0.938062	1.11313	0.996649	1.00398	1.05286	1.27798	0.545481	0.755364	0.926751	1.01919	1.29175
1402	Smar_temp_011095:	1471	0	204	526	289	452	56	45	0	0	181	54	90	116	0	30	0	147	98	112	47	0	222	75	66	61	0	0	70	0	0	1.12279	1.1803	0.870907	0.904775	0.909507	1.1225	0.986291	1.17269	0.788269	1.02815	1.06041	0.861465	0.692957	1.10358	0.973137	1.30321
1403	Smar_temp_000249:	2842	0	469	737	498	1138	104	67	0	0	509	163	112	130	0	87	0	289	215	221	87	0	233	152	102	193	0	0	177	0	0	0.815261	1.21912	0.867252	0.838656	0.979292	1.00663	1.19179	1.05862	0.887617	1.24976	1.12408	0.867954	0.74887	1.07818	1.0277	1.11701
1404	Smar_temp_004325:	8450	0	1113	2743	1552	3042	306	253	0	0	1389	311	385	548	0	151	0	891	607	701	247	0	1096	398	370	345	0	0	451	0	0	1.23763	1.23088	0.764187	1.02409	0.902297	1.08773	1.07348	1.20828	0.807202	1.10159	1.03001	0.77618	0.709888	1.08641	0.861036	1.26835
1405	Smar_temp_010913:	2293	0	442	751	323	777	50	50	0	0	304	149	88	89	0	85	0	205	135	191	65	0	312	158	146	146	0	0	119	0	0	0.803062	1.26847	0.831849	1.00854	0.805558	0.841301	1.09893	1.04398	1.08725	1.09144	0.997651	0.994826	0.750545	1.23343	0.974796	1.15461
1406	Smar_temp_005631:	407	0	66	129	68	144	10	12	0	0	60	23	20	26	0	8	0	40	26	31	11	0	48	23	20	27	0	0	21	0	0	1.08824	1.17397	0.927953	0.956072	0.8764	1.20634	0.88019	0.997549	0.872855	1.09948	0.747475	0.984954	0.67921	1.08068	1.15625	1.17766
1407	Smar_temp_011062:	3106	0	420	1087	570	1029	92	95	0	0	444	113	188	225	0	64	0	293	194	248	74	0	466	148	139	143	0	0	179	0	0	1.23254	1.22498	0.942443	0.945665	0.813625	1.12792	0.879508	0.960084	0.947904	1.0069	1.12689	0.812111	0.688665	1.02734	1.02772	1.30243
1408	Smar_temp_010501:	1489	0	273	473	288	455	58	34	0	0	178	81	95	94	0	52	0	122	101	98	62	0	174	106	81	78	0	0	74	0	0	0.6439	1.15803	1.0384	0.934019	0.844077	1.02747	1.04121	1.17417	0.840858	1.2223	1.0389	0.97097	0.678029	1.14766	0.935008	1.28024
1409	Smar_temp_009993:	17341	0	3195	5482	2976	5688	557	553	0	0	2287	887	723	801	0	575	0	1549	1143	1273	653	0	2228	1179	982	985	0	0	965	0	0	1.00855	1.28562	0.768494	0.972245	0.861444	0.851402	1.09059	1.19092	0.988573	1.16729	0.976788	0.846384	0.707952	1.17092	0.939896	1.2258
1410	Smar_temp_010012:	2107	0	423	724	508	452	103	137	0	0	142	72	150	203	0	78	0	138	118	85	101	0	299	136	137	107	0	0	100	0	0	1.34332	1.20187	0.859317	0.942554	0.888519	1.16294	0.840958	0.990334	0.917619	0.935674	0.918498	0.793448	0.547276	1.08279	1.17915	1.46445
1411	Smar_temp_007913:	3117	0	570	1024	531	992	88	84	0	0	350	180	170	170	0	105	0	300	189	264	111	0	388	201	166	188	0	0	162	0	0	0.865061	1.15337	0.974521	0.886482	0.920548	0.974521	0.972815	1.14312	0.958618	1.07339	1.00734	0.992254	0.810082	1.11839	1.03635	1.10862
1412	Smar_temp_004237:	2962	0	548	964	458	992	82	87	0	0	401	140	101	139	0	107	0	313	188	228	99	0	382	214	168	174	0	0	138	0	0	1.02673	1.21757	0.677585	0.941969	0.969484	0.932518	1.15789	1.16835	0.899678	1.19989	1.05538	0.762818	0.706206	1.22565	0.948074	1.207
1413	Smar_temp_012806:	2231	0	315	719	439	758	92	50	0	0	337	87	134	139	0	45	0	200	163	168	74	0	278	133	106	90	0	0	134	0	0	0.806667	1.19974	0.947133	1.04416	0.818713	0.982474	1.06502	1.19387	0.898402	1.31012	1.01179	0.812904	0.687719	1.09283	0.840935	1.30855
1414	Smar_temp_009822:	9096	0	1481	3025	1525	3065	275	278	0	0	1240	403	403	492	0	251	0	949	568	804	284	0	1180	549	493	453	0	0	473	0	0	1.11962	1.17296	0.794621	1.00096	0.931024	0.970109	1.07558	1.14378	0.920473	1.11466	1.04091	0.807551	0.78877	1.10535	0.907743	1.20064
1415	Smar_temp_001919:	12576	0	2177	4139	2164	4096	401	365	0	0	1605	581	560	638	0	395	0	1254	838	1022	469	0	1642	836	682	631	0	0	656	0	0	0.974361	1.20538	0.786281	0.95186	0.930218	0.895799	1.07689	1.25199	0.930742	1.1668	1.04815	0.819408	0.75812	1.18897	0.889925	1.20309
1416	Smar_temp_007823:	9880	0	1555	3270	1577	3478	264	272	0	0	1442	462	408	527	0	256	0	1068	632	850	280	0	1328	565	466	553	0	0	506	0	0	1.09588	1.22704	0.781696	0.905451	0.927793	1.00969	1.04881	1.12811	0.911478	1.09781	1.04601	0.843993	0.738412	1.13845	1.01023	1.17778
1417	Smar_temp_003950:	9221	0	1565	3017	1938	2701	610	224	0	0	999	406	569	582	0	401	0	824	535	744	273	0	1157	534	467	423	0	0	472	0	0	0.681017	1.17209	0.897349	0.912022	0.932407	0.91785	1.49762	0.829989	0.831461	1.04287	1.50971	0.885656	0.841882	0.942439	0.92274	1.26268
1418	Smar_temp_004695:	1779	0	296	639	348	496	73	64	0	0	170	80	100	125	0	41	0	169	111	142	73	0	260	111	109	73	0	0	77	0	0	1.10531	1.13279	0.800011	1.0252	0.948593	1.00001	1.07236	1.26075	0.793607	1.04401	0.832485	0.969377	0.797043	1.14403	0.884556	1.22931
1419	Smar_temp_002901:	11516	21	2039	3626	2216	3614	482	648	0	1	1516	469	458	714	19	342	0	1057	628	756	449	0	1575	580	533	714	0	0	571	1	2	1.65154	1.37952	0.656402	0.830202	0.928882	1.0233	1.13034	1.14436	0.821069	0.903409	0.947313	0.732941	0.664366	0.903033	1.11582	1.33667
1420	Smar_temp_011789:	36764	373	6063	11492	6595	12241	1106	1113	2	1	5109	1706	1808	2002	370	1006	0	3381	2568	2748	1443	1	4504	2236	1797	1816	0	0	2044	1	1	1.02333	1.2538	0.877023	0.948173	0.883599	0.971128	0.934864	1.32674	0.930833	1.17981	1.00611	0.845079	0.71817	1.16946	0.899568	1.2535
1421	Smar_temp_002885:	1506	0	216	455	295	540	62	10	0	0	217	84	95	83	0	29	0	143	128	121	54	0	157	93	59	74	0	0	96	0	0	0.236347	1.14209	1.0659	0.90409	0.876508	0.931257	1.07293	1.27627	0.907571	1.42509	0.936085	1.08457	0.741661	1.21009	0.955453	1.12072
1422	Smar_temp_005853:	15447	0	2432	4875	2767	5373	535	588	0	0	2465	610	733	931	0	421	0	1464	910	1219	467	0	1912	813	765	779	0	0	834	0	0	1.34974	1.24275	0.839391	0.996707	0.863364	1.06613	1.07939	1.07198	0.866531	1.05925	1.09951	0.721097	0.71888	0.945496	0.920876	1.31895
1423	Smar_temp_004816:	259	0	33	81	55	90	17	4	0	0	36	7	12	14	0	8	0	30	22	22	7	0	30	14	8	10	0	0	17	0	0	0.570799	1.18427	0.697643	0.775159	1.06584	0.813917	1.45554	0.998898	0.889495	1.35653	1.90266	0.610438	0.781619	1.15111	0.872054	1.15111
1424	Smar_temp_006535:	837	0	170	241	228	198	47	35	0	0	63	36	81	73	0	36	0	41	65	31	50	0	73	63	45	39	0	0	58	0	0	0.755805	1.052	1.23384	0.919331	0.719163	1.11198	0.756752	1.07972	1.07536	1.28706	1.04263	0.895187	0.543757	1.20514	0.969786	1.34504
1425	Smar_temp_008344:	13481	0	2253	4532	2215	4481	355	304	0	0	1739	672	670	729	0	422	0	1349	886	1138	410	0	1810	855	702	718	0	0	721	0	0	0.821222	1.18801	0.899774	0.926847	0.895507	0.979007	0.975445	1.10757	0.979284	1.12885	1.12076	0.897336	0.755439	1.20339	0.958761	1.16754
1426	Smar_temp_002801:	2622	256	364	879	330	793	54	50	0	1	348	102	104	121	253	61	1	243	122	199	56	0	405	151	124	123	0	0	99	2	2	1.09141	1.37439	0.940077	1.01616	0.914065	1.09374	1.30017	1.22238	0.991929	1.23743	1.20715	0.926527	0.748555	1.22238	1.11728	1.45099
1427	Smar_temp_004976:	5244	0	781	1700	909	1854	147	131	0	0	789	229	261	291	0	130	0	543	370	483	178	0	634	291	261	212	0	0	293	0	0	0.967652	1.15041	0.885708	1.03087	0.903449	0.987513	0.932937	1.31482	0.91171	1.14936	1.11765	0.829349	0.803621	1.15131	0.767782	1.20371
1428	Smar_temp_009038:	678	0	103	225	118	232	23	25	0	0	110	19	30	39	0	13	0	67	40	51	19	0	88	46	40	31	0	0	36	0	0	1.3946	1.17855	0.766102	1.17023	0.87023	0.995932	1.11994	1.0599	0.891584	1.34576	0.830804	0.539086	0.662414	0.990649	0.879561	1.38563
1429	Smar_temp_010581:	8694	0	1655	3000	1529	2510	276	320	0	0	873	391	386	499	0	288	0	832	547	628	340	0	1218	655	564	462	0	0	414	0	0	1.09942	1.17659	0.731608	0.987596	0.960612	0.945783	1.02639	1.16814	0.937862	1.14694	0.914147	0.818323	0.725077	1.23916	0.966919	1.20472
1430	Smar_temp_000749:	2859	0	408	904	594	953	117	102	0	0	406	123	156	196	0	55	0	267	218	218	124	0	362	128	118	111	0	0	157	0	0	1.20328	1.26644	0.830585	0.914677	0.886062	1.04356	0.948041	1.46281	0.792929	0.992192	0.944619	0.904412	0.723451	1.10101	0.816176	1.27807
1431	Smar_temp_004748:	1500	0	208	460	319	513	90	25	0	0	213	69	87	89	0	31	0	145	117	111	54	0	176	83	51	72	0	0	86	0	0	0.565168	1.24764	0.889328	0.79954	0.921688	0.909772	1.32664	1.22076	0.788282	1.30121	1.0748	0.969973	0.705568	1.07243	1.01215	1.21405
1432	Smar_temp_004358:	8544	0	1431	2937	1449	2727	232	196	0	0	1032	399	444	473	0	247	0	864	577	695	313	0	1180	589	448	423	0	0	431	0	0	0.807624	1.16879	0.891398	0.910743	0.921692	0.94962	0.944088	1.28973	0.931934	1.19738	1.03057	0.873593	0.741407	1.24762	0.92614	1.18569
1433	Smar_temp_004809:	894	0	188	242	221	243	58	67	0	0	80	42	38	71	0	28	0	73	58	45	44	0	74	51	56	60	0	0	48	0	0	1.44166	1.12964	0.635204	1.1004	1.10978	1.18683	1.06165	0.94676	0.799062	1.00215	0.708239	0.821907	0.684114	0.965533	1.17415	1.2112
1434	Smar_temp_006552:	3046	0	472	976	579	1019	123	102	0	0	402	135	162	180	0	64	0	300	192	258	94	0	367	171	146	167	0	0	182	0	0	1.13687	1.17354	0.873206	0.965364	0.918813	0.970228	1.11758	1.0477	0.939612	1.13067	0.875036	0.854963	0.790179	0.991239	1.05762	1.17925
1435	Smar_temp_003456:	7389	0	992	2481	1234	2682	218	123	0	0	1177	307	355	401	0	141	0	797	538	644	215	0	1015	421	314	322	0	0	400	0	0	0.742444	1.21842	0.856785	0.942707	0.885031	0.967806	1.05782	1.29777	0.893042	1.26395	1.05872	0.852616	0.715132	1.20114	0.894275	1.20905
1436	Smar_temp_004769:	4186	0	612	1212	922	1440	258	129	0	0	644	166	282	248	0	101	0	363	253	365	148	0	383	216	184	178	0	0	267	0	0	0.956988	1.09142	1.05637	1.0384	0.870644	0.929004	1.27045	1.09794	0.841816	1.21899	1.1288	0.788485	0.875441	0.797676	0.845484	1.30005
1437	Smar_temp_006925:	8765	0	1481	2925	1499	2860	320	347	0	0	1226	349	365	455	0	245	0	856	467	640	295	0	1290	540	414	527	0	0	428	0	0	1.37001	1.32157	0.729655	0.837667	0.896879	0.909569	1.24824	1.16471	0.87504	1.09261	0.979057	0.722198	0.670564	0.954775	1.09054	1.31374
1438	Smar_temp_013221:	41234	60	7606	13290	6789	13489	1288	1261	0	0	5685	2118	1819	2118	57	1599	1	3730	2421	2984	1427	3	5559	2628	2179	2398	0	0	1956	0	2	1.00695	1.29778	0.831299	0.888856	0.857945	0.967945	1.15228	1.13951	0.880722	1.07201	1.1397	0.851227	0.686356	1.0901	0.963759	1.28833
1439	Smar_temp_002239:	345	0	65	115	69	96	11	18	0	0	31	11	20	27	0	15	0	36	20	24	13	0	42	21	16	21	0	0	18	0	0	1.38462	1.09565	0.869565	0.738462	1.125	1.17391	0.797101	1	0.9375	0.969231	1.22485	0.608173	0.75	1.04167	1.16106	1.16048
1440	Smar_temp_003300:	5479	0	873	1719	913	1974	172	131	0	0	870	255	242	287	0	166	0	566	368	451	171	0	659	321	251	285	0	0	283	0	0	0.900508	1.2219	0.844831	0.9164	0.913892	1.00193	1.13055	1.17547	0.860339	1.17197	1.19339	0.810737	0.728207	1.11875	0.906118	1.22328
1441	Smar_temp_006730:	465	0	88	168	96	113	17	18	0	0	36	14	26	39	0	18	0	44	35	25	21	0	65	38	32	17	0	0	19	0	0	0.990767	1.0709	0.749628	1.00649	1.07775	1.12444	0.857747	1.15589	0.814436	1.19521	1.08084	0.654666	0.612358	1.50028	0.794952	1.31099
1442	Smar_temp_004399:	7572	0	1080	2516	1359	2617	267	267	0	0	1163	293	339	465	0	173	0	774	486	618	241	0	1087	346	316	350	0	0	386	0	0	1.37746	1.30023	0.750724	0.880569	0.890097	1.02975	1.09467	1.24332	0.821816	0.964167	1.12308	0.784966	0.710697	1.03472	0.937672	1.28583
1443	Smar_temp_011744:	7953	322	1098	2825	1249	2459	238	183	0	0	1122	241	339	510	321	213	0	827	489	508	232	1	1346	461	312	340	0	1	268	0	0	1.06125	1.34134	0.764099	0.799954	0.946803	1.14953	1.21334	1.34541	0.693977	1.18198	1.4051	0.709884	0.581591	1.26625	1.0015	1.47573
1444	Smar_temp_003225:	1739	0	220	624	263	632	48	31	0	0	284	71	62	82	0	37	0	188	122	167	44	0	293	81	80	59	0	0	89	0	0	0.931714	1.30857	0.656978	1.0134	0.829002	0.868907	1.20678	1.32243	0.931144	1.02607	1.3294	0.888011	0.736401	1.2764	0.737924	1.23647
1445	Smar_temp_004656:	6925	0	1104	2215	1273	2333	265	155	0	0	934	319	326	355	0	209	0	674	527	544	248	0	895	421	319	328	0	0	405	0	0	0.763755	1.26327	0.800636	0.903374	0.903215	0.871858	1.13242	1.22201	0.944347	1.19223	1.18748	0.857683	0.729004	1.22882	0.881881	1.18833
1446	Smar_temp_010672:	4229	0	541	1323	726	1639	140	94	0	0	810	174	202	232	0	79	0	407	290	350	105	0	546	194	168	189	0	0	248	0	0	1.01212	1.3192	0.889391	0.992636	0.793767	1.02148	1.12329	1.13056	0.881402	1.14626	1.14149	0.829871	0.682601	1.03067	0.901412	1.27516
1447	Smar_temp_010907:	3503	0	565	1262	667	1009	110	133	0	0	406	123	225	278	0	105	0	306	199	220	106	0	560	204	170	184	0	0	173	0	0	1.23628	1.23171	0.936348	0.835182	0.841804	1.15691	0.866126	0.985307	0.90047	1.00222	1.15221	0.755798	0.605219	1.0358	1.13062	1.39696
1448	Smar_temp_005613:	3008	0	432	1004	453	1119	75	59	0	0	495	125	112	147	0	67	0	351	207	269	82	0	406	181	135	148	0	0	148	0	0	0.906876	1.21154	0.740737	0.936255	0.939769	0.972217	1.09937	1.2604	0.878236	1.25528	1.0799	0.777811	0.720222	1.22834	0.920928	1.18911
1449	Smar_temp_012197:	1470	0	248	513	292	417	56	66	0	0	141	56	65	115	0	30	0	147	104	81	48	0	221	96	79	91	0	0	73	0	0	1.33976	1.23445	0.637867	0.912799	1.01014	1.12853	0.965472	0.97437	0.881295	1.10922	0.717027	0.796008	0.556607	1.25554	1.29351	1.19197
1450	Smar_temp_012930:	4554	0	817	1452	894	1391	173	238	0	0	604	152	220	327	0	174	0	427	263	294	186	0	577	253	228	229	0	0	208	0	0	1.48392	1.24634	0.771812	0.875264	0.96278	1.14719	0.985744	1.1597	0.761714	0.971236	1.18713	0.609098	0.662898	0.963128	0.917655	1.42159
1451	Smar_temp_011064:	6283	0	974	2049	1123	2137	209	213	0	0	920	259	303	360	0	162	0	607	398	498	203	0	850	340	289	320	0	0	351	0	0	1.22351	1.27204	0.827348	0.909838	0.870982	0.982987	1.04125	1.16607	0.918946	1.0704	1.07291	0.781814	0.714578	1.042	0.965948	1.26574
1452	Smar_temp_012751:	1034	0	233	340	196	265	40	53	0	0	78	50	48	72	0	47	0	96	55	58	44	0	127	83	68	74	0	0	40	0	0	1.20001	1.13597	0.744778	0.887554	1.10171	1.11717	1.07663	0.996234	0.796303	1.08334	0.895172	0.837315	0.665616	1.09492	1.23923	1.14848
1453	Smar_temp_006721:	1042	0	191	313	234	304	49	43	0	0	111	37	63	68	0	33	0	86	79	55	47	0	111	78	52	59	0	0	70	0	0	1.00251	1.1806	0.896289	0.906345	0.941777	0.967423	0.932464	1.09576	1.02536	1.35952	0.942573	0.663991	0.602299	1.15719	1.0588	1.25154
1454	Smar_temp_012117:	331	0	49	108	71	103	12	13	0	0	36	9	16	26	0	9	0	34	30	22	9	0	41	18	16	15	0	0	24	0	0	1.23685	1.16349	0.690662	1.00076	1.01169	1.12233	0.787939	0.856281	1.08628	1.12585	1.24073	0.590252	0.654621	1.35786	0.983753	1.1232
1455	Smar_temp_000631:	1000	0	203	248	209	340	46	37	0	0	137	55	43	50	0	36	0	90	83	60	54	0	62	75	53	60	0	0	58	0	0	0.872086	1.00806	0.829603	1.05276	1.06736	0.964655	1.05309	1.27277	0.816212	1.48975	0.873596	0.79687	0.711575	1.16803	0.869313	1.18512
1456	Smar_temp_002219:	1557	0	274	476	258	549	56	69	0	0	281	46	67	81	0	54	0	151	66	116	50	0	175	104	83	86	0	0	71	0	0	1.51973	1.20258	0.849448	0.990853	0.899676	1.02694	1.3099	1.10126	0.780468	1.24155	1.11991	0.476128	0.691142	0.725505	0.890152	1.45161
1457	Smar_temp_007135:	4883	0	767	1552	923	1641	190	182	0	0	676	182	228	280	0	130	0	504	323	404	174	0	596	272	224	238	0	0	279	0	0	1.25534	1.20823	0.777192	0.918856	0.966311	0.954446	1.08902	1.20016	0.899457	1.11575	1.07904	0.70608	0.774583	1.04131	0.923336	1.22579
1458	Smar_temp_008540:	2017	0	489	515	522	491	120	136	0	0	149	110	116	120	0	116	0	117	150	69	167	0	198	127	83	123	0	0	115	0	0	1.07465	1.50576	0.870334	0.664765	0.933261	0.900346	0.888272	1.3196	0.905007	1.01717	0.978467	0.924077	0.550385	1.18044	1.03329	1.24661
1459	Smar_temp_011931:	14836	0	2241	4975	2994	4626	545	556	0	0	1787	531	837	1069	0	327	0	1457	1056	1119	529	0	1960	827	720	664	0	0	851	0	0	1.22941	1.17486	0.833676	0.958108	0.939242	1.06475	0.902007	1.16971	0.911568	1.10049	0.966008	0.759913	0.721354	1.13116	0.950249	1.23888
1460	Smar_temp_005284:	13536	234	2242	3971	2551	4538	606	463	0	1	1995	643	594	774	232	448	1	1200	888	914	471	0	1593	688	583	740	0	1	699	1	0	1.09578	1.36743	0.793718	0.886387	0.901379	1.03424	1.2605	1.11472	0.817321	1.04603	1.20642	0.855463	0.68655	1.03831	0.984514	1.31131
1461	Smar_temp_006378:	8910	0	1392	2843	1679	2996	287	381	0	0	1333	303	399	610	0	216	0	890	612	599	312	0	1141	492	412	452	0	0	470	0	0	1.45249	1.25779	0.744771	0.927596	0.930999	1.13862	0.907106	1.18944	0.832498	1.10771	0.993237	0.64735	0.626593	1.08402	0.965684	1.3232
1462	Smar_temp_010679:	3900	0	770	1264	694	1172	137	166	0	0	463	185	169	229	0	158	0	352	222	268	156	0	506	261	236	219	0	0	172	0	0	1.2115	1.23515	0.751354	0.945668	0.926686	1.01811	1.10934	1.13852	0.824719	1.04584	1.0393	0.799499	0.705545	1.06446	0.946434	1.31459
1463	Smar_temp_008420:	4890	0	856	1558	901	1575	173	186	0	0	635	204	256	303	0	170	0	461	286	384	150	0	574	296	266	270	0	0	275	0	0	1.1793	1.15634	0.891778	0.975325	0.918675	1.0555	1.04209	0.951046	0.947624	1.08532	1.13452	0.73992	0.76523	0.985529	0.979306	1.25176
1464	Smar_temp_007900:	360	0	83	98	72	107	14	14	0	0	39	26	21	29	0	20	0	29	23	24	16	0	21	23	26	21	0	0	13	0	0	0.843373	0.787172	1.07143	1.15073	0.995613	1.47959	0.972222	0.963855	0.607477	1.01795	1.04514	1.05394	0.823956	1.07477	0.851255	1.22631
1465	Smar_temp_002713:	13025	40	2180	3787	2627	4391	582	555	0	1	2003	516	624	799	38	431	0	1173	866	862	549	0	1448	677	540	660	0	0	697	1	2	1.26228	1.31509	0.816972	0.851961	0.918792	1.04609	1.09845	1.24863	0.787022	1.06811	1.18125	0.702114	0.67519	0.97785	0.898053	1.35311
1466	Smar_temp_000282:	888	0	123	336	233	196	53	49	0	0	60	22	72	111	0	14	0	68	59	48	23	0	138	38	57	29	0	0	46	0	0	1.51827	1.08546	0.816677	1.22474	0.91691	1.25904	0.866916	0.712656	0.894456	0.816492	0.821733	0.810353	0.64723	1.14724	1.06819	1.38692
1467	Smar_temp_003867:	1403	20	223	482	224	454	33	49	1	0	193	52	57	88	19	51	0	151	85	113	45	0	209	70	64	63	0	0	58	1	0	1.37626	1.26215	0.740692	0.835383	0.968126	1.14352	0.922732	1.26391	0.800169	0.9137	1.43886	0.72061	0.724491	1.17266	0.873047	1.31372
1468	Smar_temp_006985:	6344	0	993	2117	1162	2072	259	206	0	0	822	257	278	352	0	179	0	637	418	522	195	0	892	351	309	310	0	0	356	0	0	1.1326	1.26266	0.716937	0.932506	0.921281	0.907776	1.21689	1.07212	0.938031	1.05925	1.15164	0.792423	0.754958	1.1014	0.955841	1.21466
1469	Smar_temp_005791:	2496	0	296	885	386	929	71	6	0	0	409	101	140	119	0	39	0	284	168	255	61	0	361	150	99	97	0	0	135	0	0	0.131074	1.15044	1.02292	0.943289	0.862192	0.869483	1.1894	1.33259	0.93967	1.42923	1.11103	0.916766	0.774151	1.16937	0.880458	1.18287
1470	Smar_temp_007457:	3609	0	613	1056	619	1321	87	195	0	0	668	126	160	254	0	98	0	353	176	280	104	0	328	194	214	197	0	0	174	0	0	1.85469	1.06153	0.88339	1.1931	0.913261	1.40238	0.819454	0.989166	0.767967	1.08159	0.941222	0.561557	0.7244	0.776794	0.87799	1.38152
1471	Smar_temp_009430:	1172	0	174	329	267	402	56	29	0	0	151	56	70	79	0	22	0	108	112	82	45	0	100	67	50	57	0	0	87	0	0	0.731586	1.08277	0.933939	1.02365	0.957039	1.05402	0.920647	1.13522	0.949969	1.37169	0.851632	0.938297	0.72664	1.22295	0.955052	1.0951
1472	Smar_temp_009303:	16408	0	2594	5443	2951	5420	610	450	0	0	2290	679	808	963	0	448	0	1569	1083	1244	497	0	2219	1017	846	803	0	0	881	0	0	0.964559	1.22896	0.82539	0.983145	0.872652	0.983727	1.14934	1.0653	0.903781	1.18187	1.09243	0.792421	0.691892	1.111	0.937135	1.27906
1473	Smar_temp_011731:	1591	0	259	562	294	476	39	58	0	0	187	58	106	109	0	42	0	144	91	121	60	0	231	101	80	77	0	0	86	0	0	1.21186	1.16362	1.02069	0.874428	0.856425	1.04957	0.717861	1.25364	0.97772	1.10397	0.996139	0.748499	0.719635	1.03456	0.993697	1.3131
1474	Smar_temp_003482:	2564	0	376	855	416	917	87	61	0	0	428	104	117	130	0	61	0	268	151	229	82	0	345	150	124	109	0	0	117	0	0	0.999923	1.21005	0.843421	0.988976	0.87643	0.937135	1.28899	1.34416	0.786396	1.19634	1.1063	0.773382	0.74889	1.01492	0.810564	1.30504
1475	Smar_temp_003822:	3584	0	612	1103	722	1147	154	191	0	0	533	103	174	258	0	120	0	330	203	241	129	0	405	198	193	170	0	0	181	0	0	1.54922	1.19309	0.783077	1.0247	0.934852	1.16111	1.0588	1.04633	0.783332	1.05125	1.14828	0.525885	0.682725	0.878544	0.867965	1.45201
1476	Smar_temp_007044:	17648	29	2759	5402	3686	5772	812	797	0	10	2525	622	877	1236	19	505	10	1599	1200	1160	622	0	2171	835	754	877	0	0	1016	0	0	1.38308	1.31294	0.777294	0.892813	0.90503	1.09548	1.05473	1.07939	0.842767	0.988725	1.1708	0.689299	0.656557	0.995394	0.97189	1.33753
1477	Smar_temp_009339:	2843	0	471	1051	457	864	64	139	0	0	334	128	118	183	0	68	0	289	136	246	97	0	486	135	158	148	0	0	113	0	0	1.83592	1.25086	0.698457	0.907424	0.904812	1.0832	0.871213	1.28118	0.813627	0.775331	0.871453	0.894236	0.770186	0.979233	1.03396	1.27203
1478	Smar_temp_001730:	1409	0	363	394	272	380	54	84	0	0	139	68	56	76	0	93	0	105	78	61	74	0	138	118	95	101	0	0	68	0	0	1.19871	1.25256	0.736265	0.935905	0.988145	0.999216	1.02841	1.05601	0.926974	1.16249	0.994445	0.694592	0.574065	1.06329	1.03167	1.35631
1479	Smar_temp_005218:	6268	0	913	2252	1062	2041	185	134	0	0	762	275	333	342	0	138	0	644	409	570	175	0	975	365	300	300	0	0	360	0	0	0.866241	1.20503	0.872731	0.914558	0.87822	0.896318	1.02814	1.13128	1.04103	1.11271	1.03769	0.925013	0.777307	1.18273	1.00911	1.14656
1480	Smar_temp_008601:	3035	0	516	987	534	998	101	55	0	0	372	158	154	168	0	90	0	304	224	250	101	0	356	213	173	152	0	0	163	0	0	0.605802	1.10911	0.88679	1.03095	0.936666	0.967408	1.07497	1.11247	0.92827	1.26932	1.02589	0.931184	0.770284	1.27566	0.895823	1.13355
1481	Smar_temp_005103:	2868	0	502	892	568	906	115	114	0	0	369	125	137	193	0	92	0	274	202	197	121	0	331	171	150	138	0	0	138	0	0	1.14665	1.1931	0.775508	0.960731	0.972381	1.0925	1.0223	1.21706	0.769098	1.09523	1.04703	0.788238	0.699121	1.12578	0.870215	1.28929
1482	Smar_temp_003338:	497	0	85	156	110	146	21	27	0	0	56	20	33	46	0	14	0	49	29	30	22	0	55	24	18	31	0	0	21	0	0	1.43519	1.12323	0.955769	0.674661	1.06924	1.33228	0.862562	1.16941	0.649875	0.899548	0.963045	0.800967	0.654636	0.897447	1.2415	1.30569
1483	Smar_temp_003342:	2422	0	416	882	364	760	67	73	0	0	339	79	109	133	0	80	0	227	115	178	50	0	388	183	158	128	0	0	114	0	0	1.16762	1.208	0.822301	1.04296	0.820196	1.00336	1.22475	0.799741	0.998077	1.20799	1.11964	0.605194	0.64315	1.00683	0.980567	1.4215
1484	Smar_temp_002016:	636	0	121	224	116	175	22	14	0	0	54	37	29	39	0	24	0	58	51	40	29	0	98	46	38	30	0	0	26	0	0	0.634369	1.24219	0.709821	0.891677	0.94102	0.954587	1.03983	1.31405	0.814581	1.0794	1.04255	1.11131	0.64898	1.59783	0.901063	1.12144
1485	Smar_temp_003283:	1684	0	218	569	363	534	87	49	0	0	202	62	121	131	0	31	0	164	106	151	38	0	210	76	74	75	0	0	106	0	0	1.04274	1.09229	0.986526	1.00463	0.908934	1.06806	1.11185	0.808654	0.920874	1.03178	1.09848	0.896883	0.836884	0.920874	1.08494	1.19292
1486	Smar_temp_008289:	501	0	89	171	110	131	20	13	0	0	40	22	37	38	0	8	0	41	40	31	24	0	55	46	37	20	0	0	28	0	0	0.665271	0.942341	0.985486	1.21802	0.916968	1.01212	0.828099	1.22819	0.973491	1.51429	0.505997	0.945364	0.693317	1.3907	0.859422	1.16776
1487	Smar_temp_012398:	10076	54	1488	3364	1681	3489	314	330	0	0	1564	373	409	558	53	282	0	1067	628	842	323	0	1460	503	427	455	0	0	485	1	1	1.32933	1.29996	0.728765	0.859522	0.916	0.994257	1.11965	1.30113	0.833223	1.01251	1.28331	0.723924	0.722842	1.07889	0.883071	1.29456
1488	Smar_temp_002646:	12928	0	1881	4046	2153	4848	379	514	0	0	2383	412	505	753	0	316	0	1417	755	1047	385	0	1607	639	517	663	0	0	635	0	0	1.64082	1.2691	0.749468	0.878228	0.933927	1.11752	1.05702	1.22902	0.786499	1.08547	1.15462	0.584086	0.690064	0.935129	0.939926	1.31078
1489	Smar_temp_003328:	8556	0	1298	3026	1513	2719	262	309	0	0	1111	285	425	562	0	227	0	889	517	689	255	0	1297	477	414	402	0	0	434	0	0	1.34622	1.21192	0.79424	0.901836	0.924473	1.05027	0.979251	1.11096	0.902635	1.03907	1.15278	0.690926	0.716493	1.07526	0.97457	1.28578
1490	Smar_temp_006799:	26114	20	3826	8757	4236	9275	807	418	0	0	3984	1240	1303	1349	19	592	1	2682	1708	2280	711	0	3550	1576	1221	1302	0	0	1369	1	0	0.673517	1.2089	0.91729	0.951675	0.862309	0.949673	1.17445	1.14562	0.909928	1.22837	1.0561	0.912507	0.733059	1.13525	0.958132	1.20939
1491	Smar_temp_011486:	5648	0	886	1711	1020	2031	199	177	0	0	931	245	252	306	0	150	0	534	392	450	194	0	640	314	285	257	0	0	321	0	0	1.1062	1.23474	0.81554	1.06183	0.867913	0.990298	1.08031	1.21245	0.875164	1.16988	1.07924	0.768984	0.731387	1.06874	0.806648	1.27475
1492	Smar_temp_010741:	3600	0	545	1202	654	1199	103	159	0	0	529	117	180	243	0	75	0	376	212	298	131	0	466	194	179	160	0	0	177	0	0	1.60593	1.16113	0.824314	0.983682	0.939219	1.11282	0.86693	1.32312	0.812604	1.06611	0.909014	0.644574	0.744381	0.973288	0.881469	1.32471
1493	Smar_temp_006469:	739	0	114	258	155	212	29	8	0	0	65	34	59	75	0	36	0	80	59	45	18	0	101	36	17	43	0	0	33	0	0	0.334578	1.12131	1.0903	0.427139	1.08088	1.38597	0.892029	0.752801	0.742149	0.904529	2.04709	1.03964	0.607997	1.32687	1.31484	1.06877
1494	Smar_temp_000939:	1387	0	276	446	205	460	26	43	0	0	191	70	56	75	0	58	0	138	80	99	43	0	167	105	84	90	0	0	61	0	0	1.0541	1.16446	0.849524	0.946481	0.93296	1.13776	0.858108	1.0541	0.897211	1.1831	1.05605	0.764729	0.669297	1.17667	0.983223	1.25197
1495	Smar_temp_008852:	31952	0	4770	10031	5650	11501	1076	654	0	0	5075	1554	1623	1760	0	726	0	3056	2297	2593	998	0	3841	1836	1510	1536	0	0	1816	0	0	0.77537	1.2197	0.915006	1.00835	0.846392	0.992243	1.07699	1.18321	0.892956	1.22605	1.01953	0.905097	0.718159	1.12947	0.894613	1.22592
1496	Smar_temp_009815:	23104	0	4061	7434	4021	7588	777	691	0	0	3188	1088	1130	1248	0	778	0	2119	1423	1740	803	0	2942	1504	1243	1237	0	0	1192	0	0	0.977683	1.22994	0.873392	0.951268	0.867897	0.964595	1.1103	1.13615	0.902614	1.15101	1.08994	0.815748	0.712667	1.07753	0.927463	1.27924
1497	Smar_temp_010104:	1319	1	195	473	213	437	29	31	0	0	185	59	65	74	0	27	0	129	88	107	46	0	213	78	64	57	0	0	64	1	1	0.984447	1.25575	0.850976	0.915227	0.823175	0.968804	0.843109	1.46079	0.906909	1.11543	0.936568	0.913231	0.682788	1.247	0.882274	1.27777
1498	Smar_temp_009447:	4022	340	691	1259	554	1178	95	70	1	1	445	189	167	181	339	155	0	373	221	292	108	0	510	276	208	220	0	0	170	0	0	0.735449	1.29408	0.962993	0.961616	1.01153	1.04372	1.24493	1.13469	1.0477	1.27599	1.30562	0.933857	0.79187	1.36201	1.08703	1.28977
1499	Smar_temp_005735:	3869	0	573	1274	704	1318	158	105	0	0	543	131	180	201	0	112	0	422	261	324	122	0	523	225	149	190	0	0	222	0	0	1.00707	1.2467	0.776478	0.789698	0.972358	0.867067	1.23342	1.17012	0.925686	1.1925	1.3198	0.67112	0.74655	1.08831	0.97338	1.20939
1500	Smar_temp_006278:	10016	0	1632	3436	1647	3301	270	301	0	0	1386	466	512	568	0	268	0	973	564	841	333	0	1429	597	521	510	0	0	476	0	0	1.12162	1.21233	0.906186	0.930591	0.859228	1.0053	0.996944	1.24087	0.876924	1.06634	1.00783	0.866392	0.742663	1.03904	0.948198	1.27399
1501	Smar_temp_005759:	2686	0	414	916	534	822	100	77	0	0	337	119	162	196	0	71	0	240	195	178	112	0	394	147	119	112	0	0	126	0	0	0.935524	1.26128	0.889579	0.842863	0.85615	1.07628	0.941941	1.36076	0.771016	1.04118	1.11266	0.939249	0.634978	1.19324	0.883999	1.33965
1502	Smar_temp_008702:	6193	0	887	1938	1125	2243	225	151	0	0	1003	295	327	340	0	134	0	589	422	516	204	0	774	307	247	302	0	0	356	0	0	0.937134	1.27625	0.928843	0.889858	0.839138	0.96577	1.10098	1.26606	0.873714	1.10602	1.05477	0.91827	0.735136	1.03569	0.940059	1.23465
1503	Smar_temp_009829:	1799	0	229	563	329	678	62	25	0	0	290	83	93	99	0	26	0	187	149	147	50	0	222	95	60	92	0	0	118	0	0	0.596953	1.25999	0.903254	0.837218	0.881322	0.961528	1.03046	1.19391	0.951673	1.3256	0.891936	0.96171	0.692804	1.20169	1.06599	1.13493
1504	Smar_temp_006558:	4041	0	803	1074	824	1340	154	217	0	0	577	226	184	239	0	124	0	320	269	235	214	0	363	236	206	259	0	0	217	0	0	1.32527	1.27171	0.840185	0.965242	0.898524	1.09133	0.916548	1.30695	0.794176	1.10581	0.777105	0.848744	0.659854	0.984485	0.972676	1.29854
1505	Smar_temp_000302:	3414	0	463	1200	543	1208	103	79	0	0	548	133	161	178	0	79	0	344	200	309	79	0	540	172	154	151	0	0	183	0	0	1.07278	1.28025	0.843545	0.946285	0.810166	0.932615	1.19262	1.07278	0.952462	1.05689	1.25814	0.811834	0.727736	1.04094	0.921706	1.28207
1506	Smar_temp_004353:	770	0	143	252	129	246	26	32	0	0	107	31	34	39	0	31	0	65	37	55	21	0	108	49	44	47	0	0	43	0	0	1.33572	1.30952	0.80534	0.940171	0.807362	0.923773	1.20305	0.876565	1.04336	1.04701	1.16729	0.678549	0.683153	0.897775	1.02877	1.36146
1507	Smar_temp_004676:	5499	0	825	1923	1067	1684	198	262	0	0	731	156	266	449	0	132	0	546	341	328	169	0	871	275	239	284	0	0	251	0	0	1.63669	1.29522	0.712889	0.828416	0.927161	1.20333	0.956357	1.05573	0.768159	0.953198	1.06647	0.617465	0.556976	1.04359	1.1241	1.41748
1508	Smar_temp_011053:	20167	0	3222	6382	3840	6723	725	698	0	0	2884	791	1059	1257	0	557	0	1904	1358	1498	714	0	2450	1176	968	983	0	0	1144	0	0	1.13773	1.21309	0.871464	0.949367	0.894928	1.0344	0.991555	1.16381	0.893661	1.15336	1.08205	0.736426	0.704098	1.06083	0.915179	1.2868
1509	Smar_temp_008730:	1587	0	215	517	282	573	46	33	0	0	233	69	78	89	0	32	0	162	125	139	38	0	208	81	69	76	0	0	108	0	0	0.86378	1.23498	0.849047	0.985138	0.867854	0.968785	0.917987	0.994656	1.06071	1.15647	1.09863	0.888859	0.74464	1.22767	0.979033	1.12622
1510	Smar_temp_013088:	10405	20	1274	2897	1758	4456	373	333	0	1	2471	338	359	555	19	197	1	1047	693	773	232	0	1164	405	327	518	0	0	598	0	0	1.54703	1.44311	0.733448	0.921875	0.843908	1.13388	1.25578	1.07781	0.79429	1.14177	1.2629	0.619504	0.623057	0.920473	0.949418	1.29486
1511	Smar_temp_002653:	8162	0	1238	2663	1365	2896	252	281	0	0	1306	314	292	516	0	178	0	906	540	564	226	0	1117	465	348	486	0	0	370	0	0	1.35722	1.2856	0.655655	0.861557	0.95886	1.15862	1.10391	1.09157	0.763954	1.15122	0.947928	0.714837	0.596906	1.11496	1.1064	1.27099
1512	Smar_temp_003518:	14768	0	2048	4858	2628	5234	531	325	0	0	2276	630	724	865	0	290	0	1505	1048	1221	409	0	1969	803	659	689	0	0	823	0	0	0.891764	1.23212	0.837486	0.978182	0.874112	1.00059	1.13544	1.12225	0.883614	1.19193	1.02108	0.867958	0.709163	1.12518	0.949243	1.22695
1513	Smar_temp_007321:	5696	0	831	2119	967	1779	162	79	0	0	657	270	363	381	0	126	0	573	363	491	145	0	890	356	292	268	0	0	279	0	0	0.559976	1.12901	1.00907	0.944541	0.8658	1.0591	0.986807	1.0278	0.923787	1.15156	1.03929	1.0403	0.741899	1.20192	1.03259	1.18245
1514	Smar_temp_010972:	68076	0	10688	21056	13030	23302	2553	2684	0	0	9908	2925	3485	4110	0	1706	0	6417	4308	5561	2315	0	8011	3373	3142	3525	0	0	4052	0	0	1.31201	1.23007	0.864722	0.950447	0.890342	1.0198	1.02366	1.13163	0.908502	1.02032	1.01667	0.799522	0.771574	0.9659	0.963526	1.24221
1515	Smar_temp_012672:	1771	0	352	541	357	521	86	131	0	0	210	56	65	124	0	71	0	184	75	118	76	0	204	94	87	118	0	0	71	0	0	1.8462	1.2344	0.596028	0.809092	1.15612	1.13704	1.19503	1.07108	0.676038	0.874191	1.01483	0.540787	0.741422	0.714124	1.13952	1.37013
1516	Smar_temp_007359:	6725	0	1050	2320	1075	2280	166	122	0	0	907	308	331	354	0	177	0	704	456	559	193	0	963	443	322	358	0	0	361	0	0	0.726866	1.20321	0.892532	0.888937	0.895039	0.954551	0.966014	1.14988	0.990504	1.22298	1.07966	0.865205	0.710692	1.25116	1.00566	1.17336
1517	Smar_temp_007464:	14677	20	2967	3803	3356	4531	764	1050	0	1	2012	599	662	1023	19	576	1	1050	879	711	700	0	1327	742	763	928	0	0	869	0	0	1.5477	1.34665	0.761285	0.992471	0.894347	1.17643	0.995604	1.0318	0.838766	0.965156	0.960339	0.653962	0.605601	0.848419	1.01315	1.43839
1518	Smar_temp_009234:	3839	0	657	1278	733	1171	133	158	0	0	447	152	202	246	0	102	0	352	239	295	134	0	492	245	231	190	0	0	220	0	0	1.25952	1.15644	0.827818	1.05617	0.902969	1.00813	0.950302	1.0682	0.983966	1.12018	0.907168	0.758472	0.75675	1.06894	0.94809	1.25145
1519	Smar_temp_001454:	1812	0	295	612	311	594	36	103	0	0	214	65	60	121	0	36	0	216	112	141	55	0	258	91	77	127	0	0	99	0	0	2.03429	1.24817	0.571212	0.772815	1.07665	1.15195	0.674435	1.08627	0.971061	0.913327	0.749578	0.672145	0.702812	1.09857	1.31327	1.099
1520	Smar_temp_000740:	658	0	92	200	124	242	16	17	0	0	96	34	23	40	0	9	0	69	67	45	24	0	83	32	25	34	0	0	43	0	0	0.98054	1.36535	0.610242	0.894022	0.938058	1.06129	0.684703	1.38429	0.942882	1.14435	0.699669	1.00485	0.611777	1.46914	1.00485	1.07861
1521	Smar_temp_000517:	2764	0	451	930	523	860	98	119	0	0	358	113	152	196	0	83	0	271	154	215	111	0	382	136	125	132	0	0	118	0	0	1.39446	1.22077	0.863768	0.823737	0.936539	1.11381	0.990286	1.30072	0.725137	0.896226	1.12788	0.80527	0.743011	0.946365	0.940669	1.3379
1522	Smar_temp_003558:	2513	0	403	852	415	843	79	58	0	0	346	114	117	151	0	75	0	255	161	202	57	0	343	156	137	134	0	0	127	0	0	0.8715	1.18743	0.831554	1.00269	0.892207	1.0732	1.15272	0.856474	0.912264	1.14175	1.1605	0.843266	0.706768	1.15649	0.991208	1.22353
[truncated: 11,711 more rows]
