# Supplementary material for: The First Myriapod Genome Sequence Reveals Conservative Arthropod Gene Content and Genome Organisation in the Centipede Strigamia maritima
Source: PubMed Central journal article supplement (PMC4244043; doi:10.1371/journal.pbio.1002005), 2014-11-25

Arthropod ground pattern (e.g. *Limulus polyphemus*)

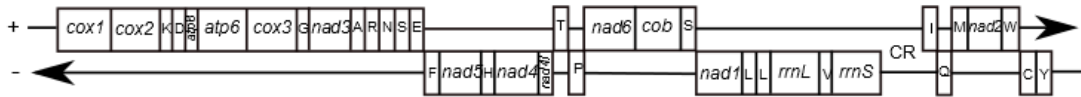

*Strigamia maritima* (Chilopoda)

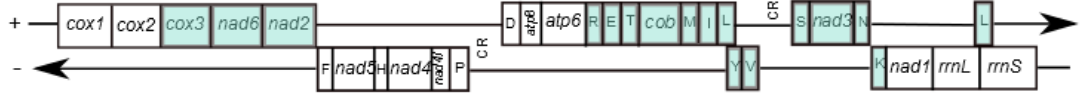

*Lithobius forficatus* (Chilopoda)

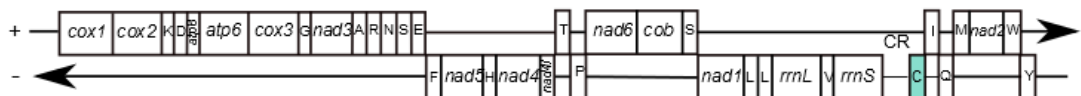

*Scutigera coleoptrata* (Chilopoda)

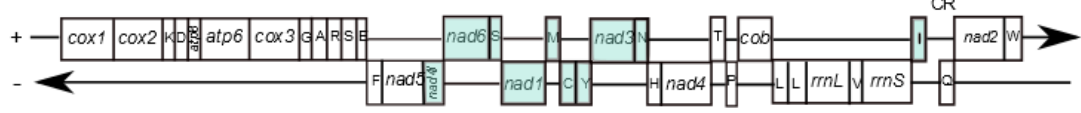

*Narceus annularis* (Diplopoda)

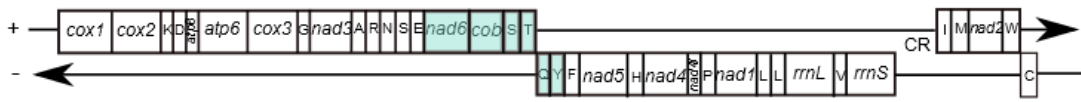

*Thyropygus* sp. (DVL-2001) (Diplopoda)

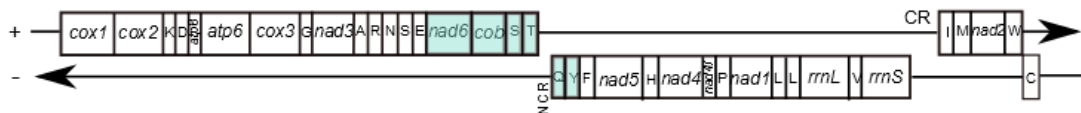

*Scutigera causeyae* (Symphyla)

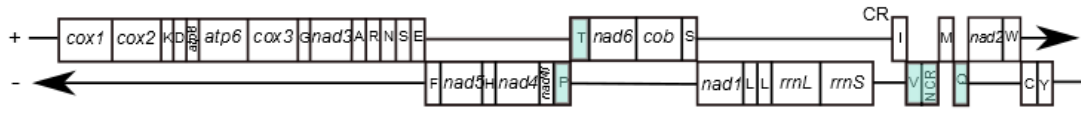

*Antokoreana gracilipes* (Diplopoda)

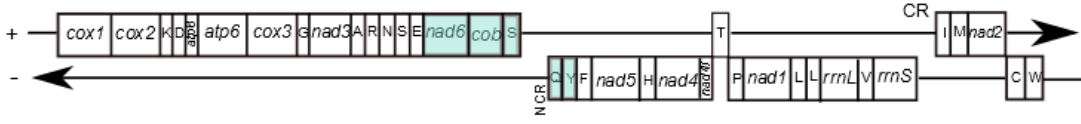

Supplement: pbio.1002005.s006.pdf [file pbio.1002005.s006.pdf]
