# Supplementary material for: The First Myriapod Genome Sequence Reveals Conservative Arthropod Gene Content and Genome Organisation in the Centipede Strigamia maritima
Source: PubMed Central journal article supplement (PMC4244043; doi:10.1371/journal.pbio.1002005), 2014-11-25
Supplement: pbio.1002005.s012.pdf [file pbio.1002005.s012.pdf]

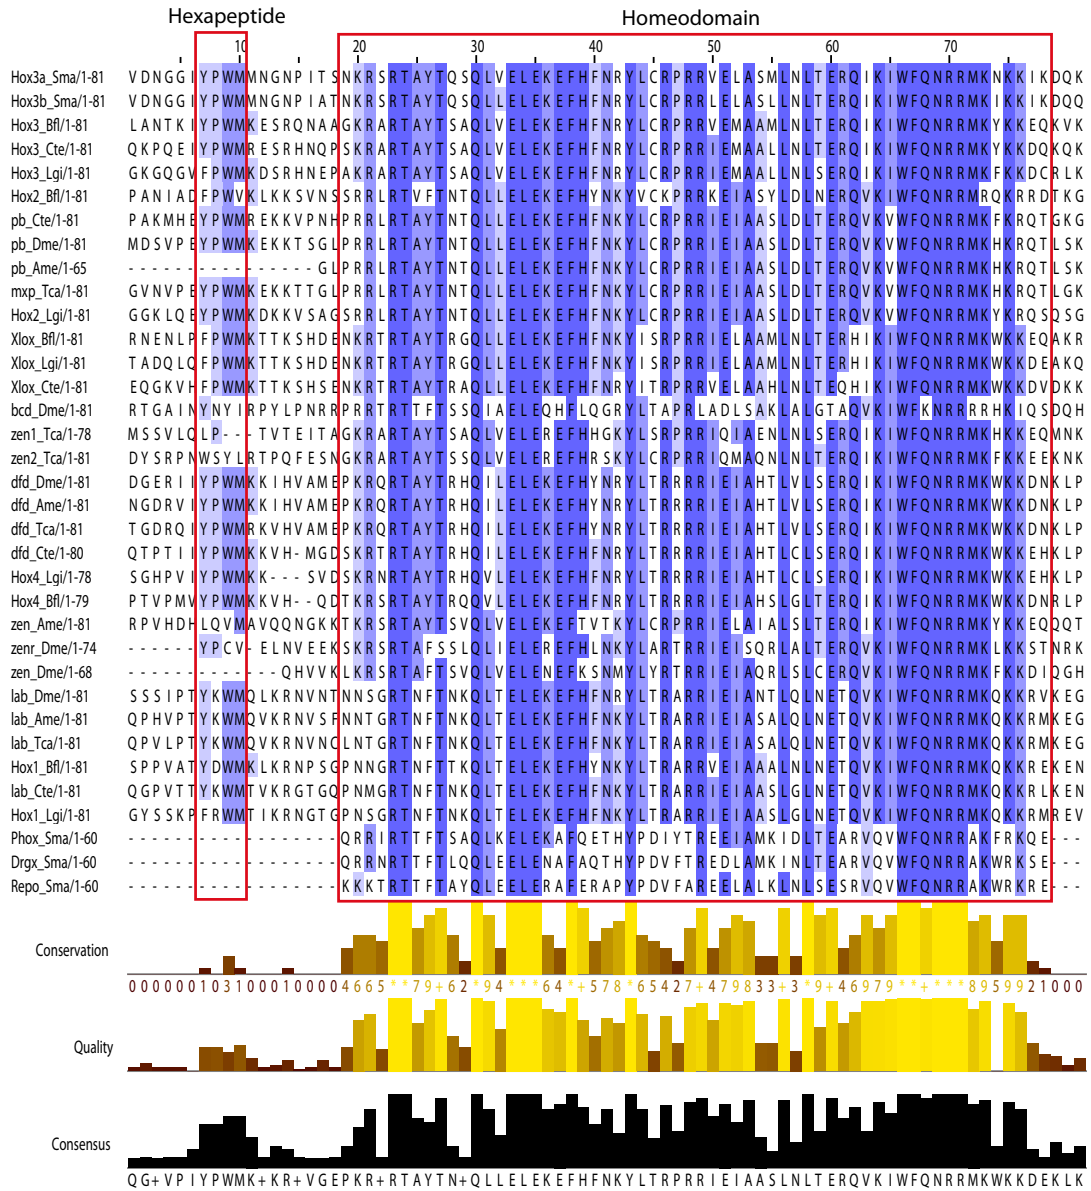

Hox3a\_Sma/1-81 V D N G G I Y P W M M N G N P I T S N K R S R T A Y T Q S Q L V E L E K E F H F N R Y L C R P R R V E L A S M L N L T E R Q I K I W F Q N R R M K N K K I K D Q K

Hox3b\_Sma/1-81 V D N G G I Y P W M M N G N P I A T N K R S R T A Y T Q S Q L L E L E K E F H F N R Y L C R P R R L E L A S L N L T E R Q I K I W F Q N R R M K I K K I K D Q Q

Hox3\_Bf1/1-81 L A N T K I Y P W M K E S R Q N A A G K R A R T A Y T S A Q L V E L E K E F H F N R Y L C R P R R V E M A A M L N L T E R Q I K I W F Q N R R M K Y K K E Q K V K

Hox3\_Cte/1-81 Q K P Q E I Y P W M R E S R H N Q P S K R A R T A Y T S A Q L V E L E K E F H F N R Y L C R P R R I E M A A L N L T E R Q I K I W F Q N R R M K Y K D Q K Q K

Hox3\_Lgi/1-81 G K G Q G V F P W M K D S R H N E P A K R A R T A Y T S A Q L V E L E K E F H F N R Y L C R P R R I E M A A L N L S E R Q I K I W F Q N R R M K F K K D C R L K

Hox2\_Bf1/1-81 P A N I A D F P W V L K K S V N S S R L R T V F T N T Q L L E L E K E F H Y N K Y V C K P R R K E I A S Y L D L N E R Q V K I W F Q N R R M R Q K R R D T K G

pb\_Cte/1-81 P A K M H E Y P W M R E K K V P N H P R R L R T A Y T N T Q L L E L E K E F H F N K Y L C R P R R I E I A A S L D L T E R Q V K V W F Q N R R M K Y K R Q T G K G

pb\_Dme/1-81 M D S V P E Y P W M K E K K T S G L P R R L R T A Y T N T Q L L E L E K E F H F N K Y L C R P R R I E I A A S L D L T E R Q V K V W F Q N R R M K H K R Q T L S K

pb\_Ame/1-65 - - - - - G L P R R L R T A Y T N T Q L L E L E K E F H F N K Y L C R P R R I E I A A S L D L T E R Q V K V W F Q N R R M K H K R Q T L S K

mxp\_Tca/1-81 G V N V P E Y P W M K E K K T T G L P R R L R T A Y T N T Q L L E L E K E F H F N K Y L C R P R R I E I A A S L D L T E R Q V K V W F Q N R R M K H K R Q T L G K

Hox2\_Lgi/1-81 G G K L Q E Y P W M K D K K V S A G S R R L R T A Y T N T Q L L E L E K E F H F N K Y L C R P R R I E I A A S L D L T E R Q V K V W F Q N R R M K Y K R Q S S G

Xlox\_Bf1/1-81 R N E N L P F P W M K T T K S H D E N K R T R T A Y T R G Q L L E L E K E F H F N K Y I S R P R R I E L A A M L N L T E R H I K I W F Q N R R M K W K E Q A K R

Xlox\_Lgi/1-81 T A D Q L Q F P W M K T T K S H D E N K R T R T A Y T R G Q L L E L E K E F H F N K Y I S R P R R I E L A A M L N L T E R H I K I W F Q N R R M K W K D E A K Q

Xlox\_Cte/1-81 E Q G K V F P W M K T T K S H S E N K R T R T A Y T R A Q L L E L E K E F H F N R Y I T R P R R V E L A A H L N L T E Q H I K I W F Q N R R M K W K D V D K K

bcd\_Dme/1-81 R T G A I N Y I R P Y L P N R R P R R T T T F T S Q I A E L E Q H F L Q G R Y L T A P R L A D L S A K L A L G T A Q V K I W F Q N R R M K Y K R Q S D Q H

zen1\_Tca/1-78 M S S V L C L P - - - T V T E I T A G K R A R T A Y T S A Q L V E L E R E F H H G K Y L S R P R R I Q I A E N L N L S E R Q I K I W F Q N R R M K H K K E Q M N K

zen2\_Tca/1-81 D Y S R P N W S Y L R T P Q F E S N G K R A R T A Y T S S Q L V E L E R E F H R S K Y L C R P R R I Q M A Q N L N L T E R Q I K I W F Q N R R M K F K K E E K N K

dfd\_Dme/1-81 D G E R I Y P W M K I H V A M E P K R Q R T A Y T R H Q I L E L E K E F H F N R Y L T R R R R I E I A H T L V L S E R Q I K I W F Q N R R M K W K D N K L P

dfd\_Ame/1-81 N G D R V I Y P W M K I H V A M E P K R Q R T A Y T R H Q I L E L E K E F H Y N R Y L T R R R R I E I A H T L V L S E R Q I K I W F Q N R R M K W K D N K L P

dfd\_Tca/1-81 T G D R Q I Y P W M R K V H V A M E P K R Q R T A Y T R H Q I L E L E K E F H Y N R Y L T R R R R I E I A H T L V L S E R Q I K I W F Q N R R M K W K D N K L P

dfd\_Cte/1-80 Q T P T I Y P W M K V H - M G D S K R T R T A Y T R H Q I L E L E K E F H F N R Y L T R R R R I E I A H T L C L S E R Q I K I W F Q N R R M K W K E H K L P

Hox4\_Lgi/1-78 S G H P V I Y P W M K K - - - S V D S K R N R T A Y T R H Q V L E L E K E F H F N R Y L T R R R R I E I A H T L C L S E R Q I K I W F Q N R R M K W K E H K L P

Hox4\_Bf1/1-79 P T V P M V Y P W M K K V H - - - Q D T K R S R T A Y T R Q V L E L E K E F H F N R Y L T R R R R I E I A H S L G L T E R Q I K I W F Q N R R M K W K D N R L P

zen\_Ame/1-81 R P V H D H L Q V M A V Q Q G K T K R S R T A Y T S V Q L V E L E K E F T V T K Y L C R P R R I E L A I A L S L T E R Q I K I W F Q N R R M K Y K K E Q Q T

zenr\_Dme/1-74 - - - - - Y P C V - E L N V E E K S K R S R T A F S S L Q L I E L E R E F H L N K Y L A R T R R I E I S Q R L A L T E R Q V K I W F Q N R R M K L K K S T N R K

zen\_Dme/1-68 - - - - - Q H V V K L K R S R T A F T S V Q L E L E N E F K S N M Y L Y R T R R I E I A Q R L S L C E R Q V K I W F Q N R R M K F K K D I Q G H

lab\_Dme/1-81 S S S I P T Y K W M Q L K R N V N T N N S G R T N F T N K Q L T E L E K E F H F N R Y L T R A R R I E I A N T L Q L N E T Q V K I W F Q N R R M K Q K R V K E G

lab\_Ame/1-81 Q P H V P T Y K W M Q V K R N V S F N N T G R T N F T N K Q L T E L E K E F H F N K Y L T R A R R I E I A S A L Q L N E T Q V K I W F Q N R R M K Q K R M K E G

lab\_Tca/1-81 Q P V L P T Y K W M Q V K R N V N C L N T G R T N F T N K Q L T E L E K E F H F N K Y L T R A R R I E I A S A L Q L N E T Q V K I W F Q N R R M K Q K R M K E G

Hox1\_Bf1/1-81 S P P V A T Y D W M K L K R N P S G P N N G R T N F T T K Q L T E L E K E F H Y N K Y L T R A R R V E I A A A L N L N E T Q V K I W F Q N R R M K Q K R E K E N

lab\_Cte/1-81 Q G P V T T Y K W M T V K R G T G P N M G R T N F T N K Q L T E L E K E F H F N K Y L T R A R R I E I A A S L G L N E T Q V K I W F Q N R R M K Q K R L K E N

Hox1\_Lgi/1-81 G Y S S K P F R W M T I K R N G T G P N S G R T N F T N K Q L T E L E K E F H F N K Y L T R A R R I E I A A S L G L N E T Q V K I W F Q N R R M K Q K R M R E V

Phox\_Sma/1-60 - - - - - Q R R I R T T F T S A Q L K E L E K A F Q E T H Y P D I Y T R E I A M K I D L T E A R V Q V W F Q N R R A K F R K Q E - - -

Drgx\_Sma/1-60 - - - - - Q R R N R T T F T L Q Q L E L E E N A F A Q T H Y P D V F T R E D L A M K I N L T E A R V Q V W F Q N R R A K W R K S E - - -

Repo\_Sma/1-60 - - - - - K K K T R T T F T A Y Q L E L E R A F E R A P Y P D V F A R E L A L K L N L S E S R V Q V W F Q N R R A K W R K R E - - -
