# Supplementary material for: The First Myriapod Genome Sequence Reveals Conservative Arthropod Gene Content and Genome Organisation in the Centipede Strigamia maritima
Source: PubMed Central journal article supplement (PMC4244043; doi:10.1371/journal.pbio.1002005), 2014-11-25
Supplement: pbio.1002005.s014.pdf [file pbio.1002005.s014.pdf]

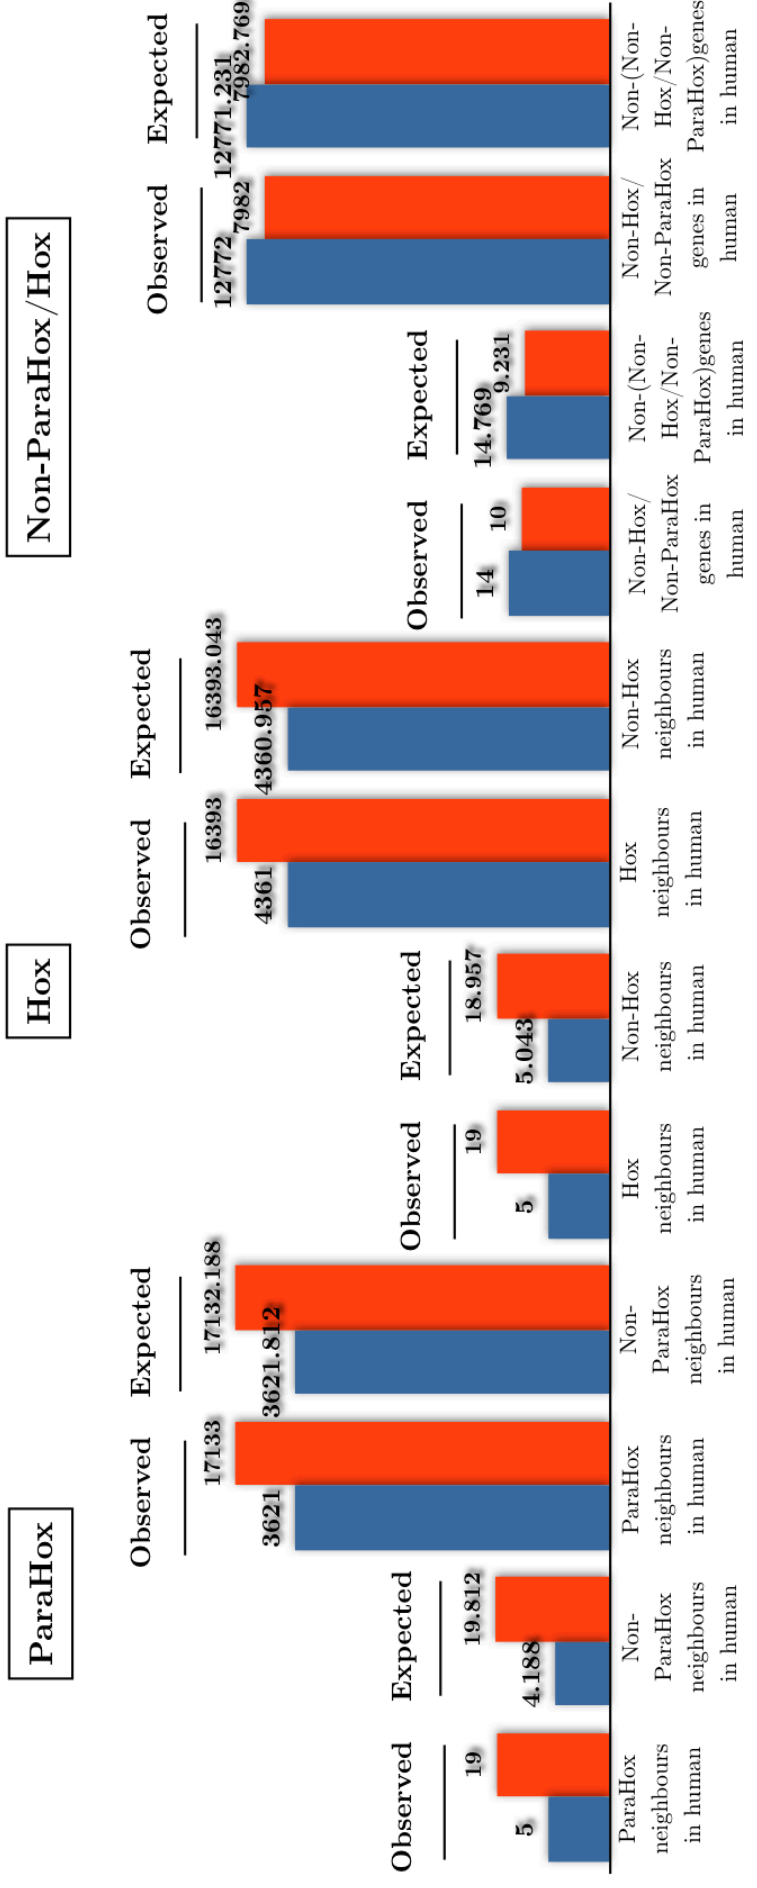

**P-value = 1**

**P-value = 0.6417**

**P-value = 0.6986**

■ Human genes with orthology on Scf48457

■ Human genes without orthology
