# Supplementary material for: The First Myriapod Genome Sequence Reveals Conservative Arthropod Gene Content and Genome Organisation in the Centipede Strigamia maritima
Source: PubMed Central journal article supplement (PMC4244043; doi:10.1371/journal.pbio.1002005), 2014-11-25

50% corrected distance

Multiple Daphnia GR subfamilies

Fructose receptors

CO2 receptors

Old and young Ixodes GR subfamilies

Sugar receptors

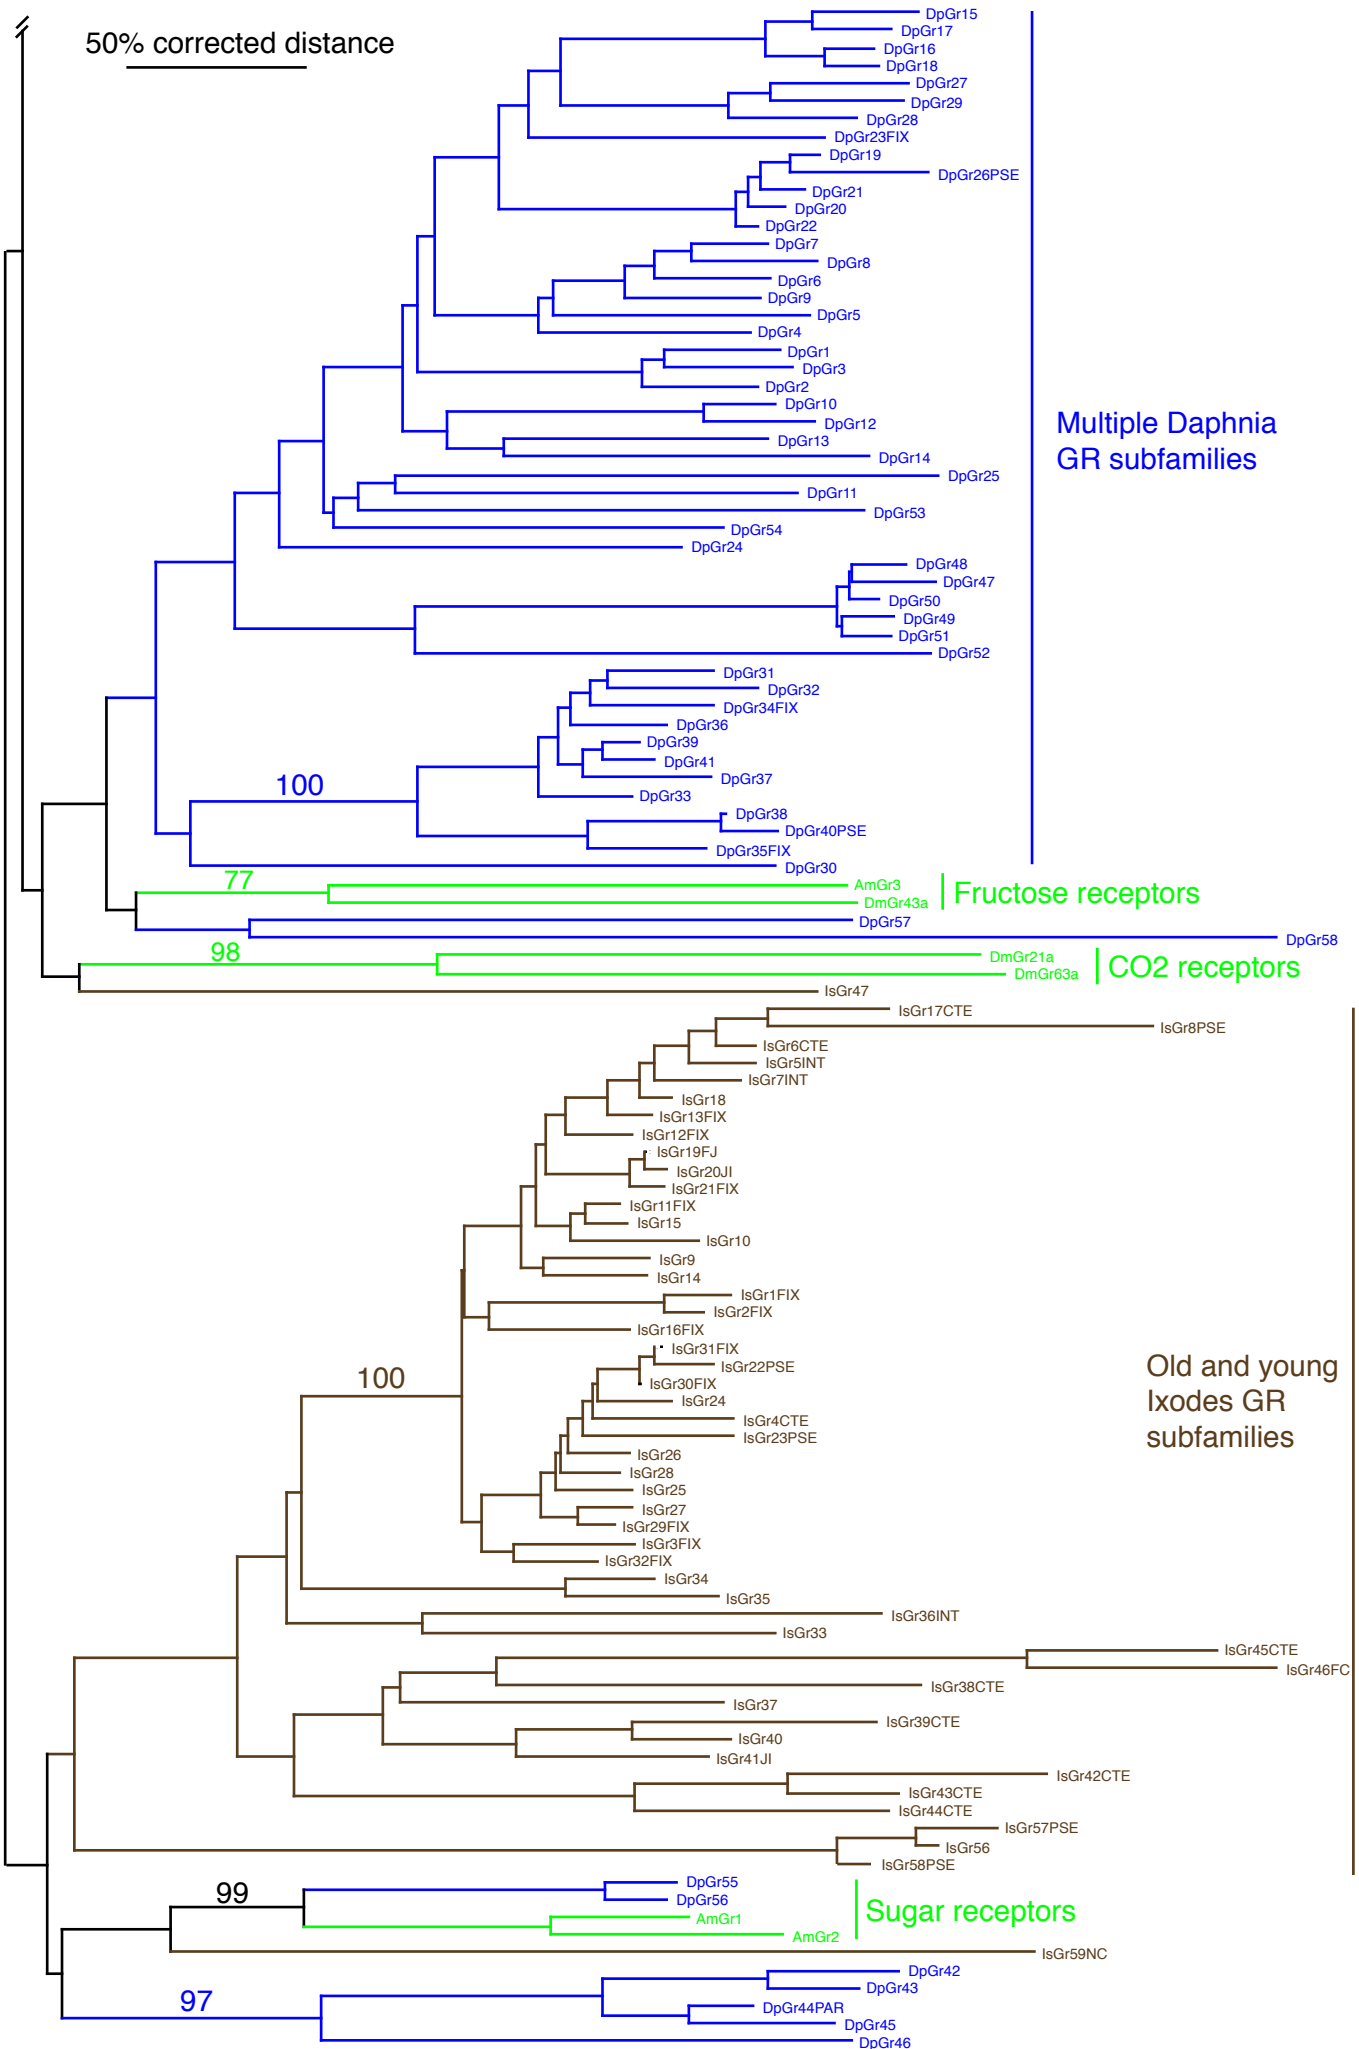

Supplement: pbio.1002005.s018.pdf [file pbio.1002005.s018.pdf]
