# Supplementary material for: The First Myriapod Genome Sequence Reveals Conservative Arthropod Gene Content and Genome Organisation in the Centipede Strigamia maritima
Source: PubMed Central journal article supplement (PMC4244043; doi:10.1371/journal.pbio.1002005), 2014-11-25

# Synthesis

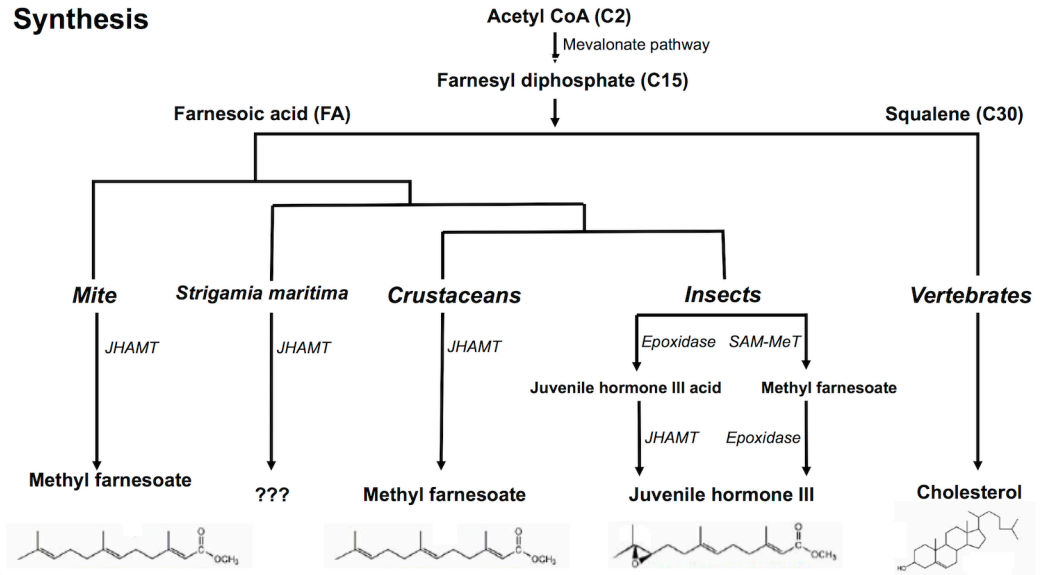

# Degradation

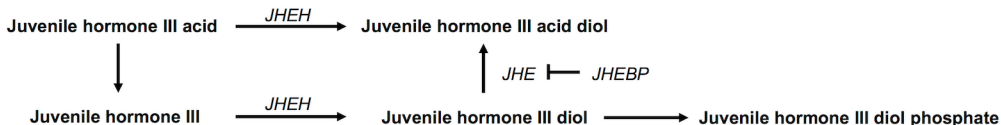

Supplement: pbio.1002005.s022.pdf [file pbio.1002005.s022.pdf]
