# Supplementary material for: The First Myriapod Genome Sequence Reveals Conservative Arthropod Gene Content and Genome Organisation in the Centipede Strigamia maritima
Source: PubMed Central journal article supplement (PMC4244043; doi:10.1371/journal.pbio.1002005), 2014-11-25

A. *Drosophila melanogaster*

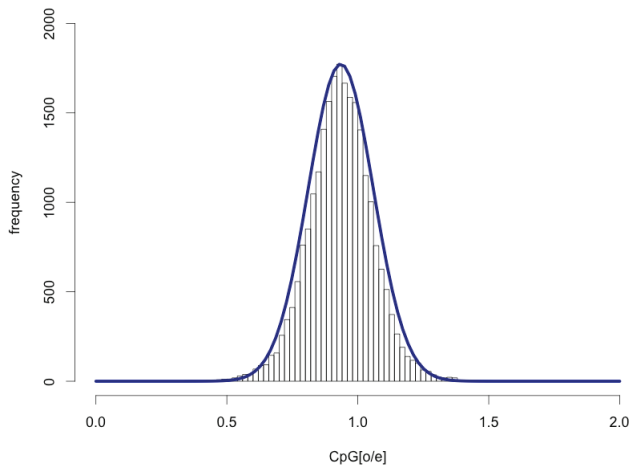

B. *Apis mellifera*

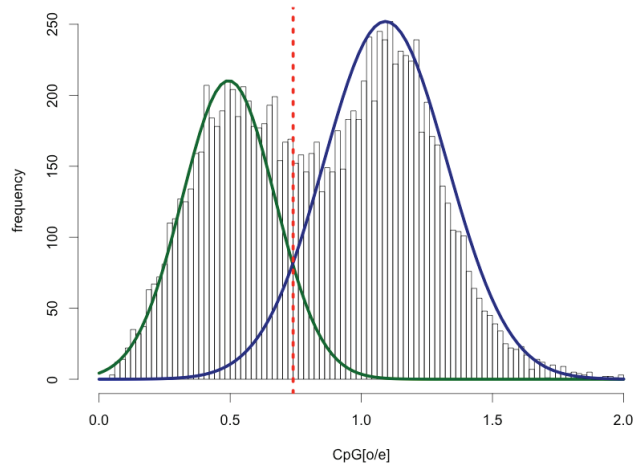

C. *Tetranychus urticae*

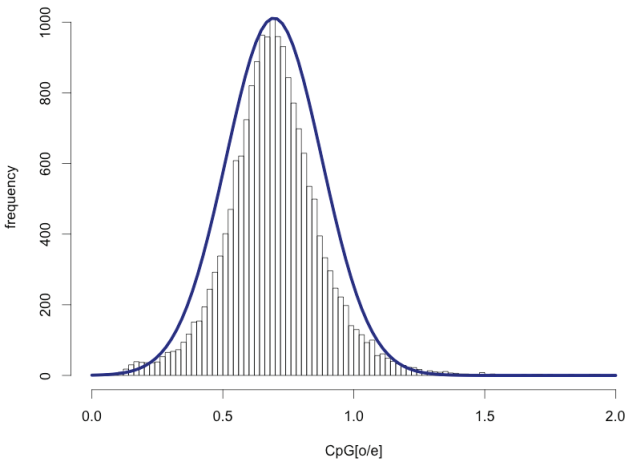

D. *Strigamia maritima*

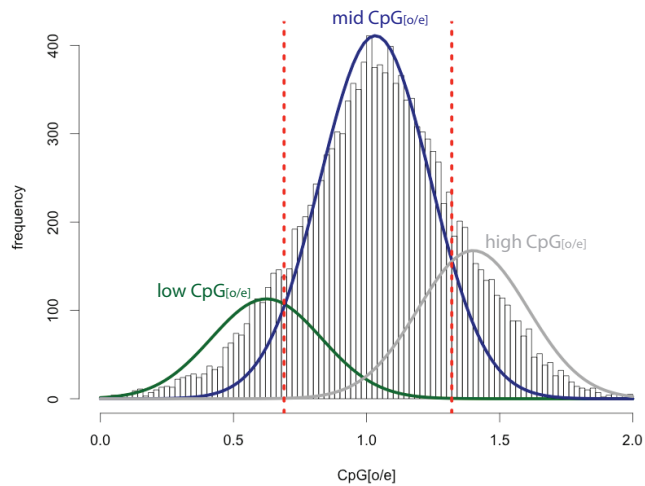

Supplement: pbio.1002005.s030.pdf [file pbio.1002005.s030.pdf]
