# Supplementary material for: The First Myriapod Genome Sequence Reveals Conservative Arthropod Gene Content and Genome Organisation in the Centipede Strigamia maritima
Source: PubMed Central journal article supplement (PMC4244043; doi:10.1371/journal.pbio.1002005), 2014-11-25
Supplement: pbio.1002005.s051.pdf [file pbio.1002005.s051.pdf]

**Table S17. Evolutionary conservation of RNA processing modes in the *S. maritima* and *D. melanogaster* Hox clusters.**

| Gene         | <i>Strigamia maritima</i>        |                           |                                   | <i>Drosophila melanogaster</i>   |                           |                                   |
|--------------|----------------------------------|---------------------------|-----------------------------------|----------------------------------|---------------------------|-----------------------------------|
|              | Alternative Promoter Usage (APU) | Alternative Splicing (AS) | Alternative Polyadenylation (APA) | Alternative Promoter Usage (APU) | Alternative Splicing (AS) | Alternative Polyadenylation (APA) |
| <i>lab</i>   | No                               | No                        | Yes                               | Yes                              | No                        | No                                |
| <i>pb</i>    | No                               | No                        | Yes                               | No                               | Yes                       | No                                |
| <i>Dfd</i>   | Yes                              | Yes                       | Yes                               | No                               | No                        | No                                |
| <i>Scr</i>   | No                               | No                        | No                                | Yes                              | No                        | No                                |
| <i>ftz</i>   | Yes                              | Yes                       | No                                | No                               | No                        | No                                |
| <i>Antp</i>  | No                               | No                        | No                                | Yes                              | No                        | Yes                               |
| <i>Ubx</i>   | No                               | No                        | Yes*                              | No                               | Yes                       | Yes*                              |
| <i>abd-A</i> | No                               | No                        | Yes*                              | Yes                              | No                        | Yes*                              |
| <i>Abd-B</i> | No                               | No                        | Yes*                              | Yes                              | Yes                       | Yes*                              |
