# Supplementary material for: The First Myriapod Genome Sequence Reveals Conservative Arthropod Gene Content and Genome Organisation in the Centipede Strigamia maritima
Source: PubMed Central journal article supplement (PMC4244043; doi:10.1371/journal.pbio.1002005), 2014-11-25
Supplement: pbio.1002005.s059.pdf [file pbio.1002005.s059.pdf]

| Wnt                | SMAR       | Scaffold | Orientation | exact position                               |
|--------------------|------------|----------|-------------|----------------------------------------------|
| 1                  | SMAR002920 | JH431262 | -           | JH431262:1251-10636                          |
| 2                  | SMAR004376 | JH431477 | +           | JH431477:348546-351888                       |
| 3                  | absent     |          |             |                                              |
| 4                  | SMAR013747 | JH431581 |             | JH431581:51660-57306                         |
| 5                  | SMAR008487 | JH431845 |             | JH431845:98065-103552                        |
| 6                  | SMAR002921 | JH431262 | +           | JH431262:10405-17870                         |
| 7a                 | SMAR012534 | JH432147 |             | JH432147:616902-620452                       |
| 7b (partial)       | SMAR004621 | JH431512 |             | JH431512:2960-3358                           |
| 8                  | absent     |          |             |                                              |
| 9                  | SMAR014558 | JH431549 |             | JH431549:26-4967                             |
| 10                 | SMAR002922 | JH431262 | +           | JH431262:18145-23485                         |
| 11                 | SMAR013488 | JH432107 |             | JH432107:26645-29318<br>JH432107:28062-29318 |
| 11                 | SMAR015633 | JH432107 |             |                                              |
| 16                 | SMAR001019 |          |             | AFFK01014592:25825-27850                     |
| 16-like1           | SMAR004315 | JH431466 |             | JH431466:16092-19535                         |
| 16-like2 (partial) | SMAR001022 |          |             | AFFK01014592:59416-61453                     |
| A                  | SMAR015773 | JH431250 |             | JH431250:56204-61501                         |
